# Supplementary material for: Dual-function enzyme catalysis for enantioselective carbon–nitrogen bond formation
Source: Springer Nature journal article supplement (doi:10.1038/s41557-021-00794-z), 2021-10-18
Supplement: MOESM3 [file 41557_2021_794_MOESM3_ESM.cif]

 
data_V20254 
  
_audit_creation_method            'SHELXL-2018/3' 
_shelx_SHELXL_version_number      '2018/3' 
_chemical_name_systematic         ? 
_chemical_name_common             ? 
_chemical_melting_point           ? 
_chemical_formula_moiety          ? 
_chemical_formula_sum 
 'C11 H13 N O3' 
_chemical_formula_weight          207.22 
  
loop_ 
 _atom_type_symbol 
 _atom_type_description 
 _atom_type_scat_dispersion_real 
 _atom_type_scat_dispersion_imag 
 _atom_type_scat_source 
 'C'  'C'   0.0181   0.0091 
 'International Tables Vol C Tables 4.2.6.8 and 6.1.1.4' 
 'H'  'H'   0.0000   0.0000 
 'International Tables Vol C Tables 4.2.6.8 and 6.1.1.4' 
 'N'  'N'   0.0311   0.0180 
 'International Tables Vol C Tables 4.2.6.8 and 6.1.1.4' 
 'O'  'O'   0.0492   0.0322 
 'International Tables Vol C Tables 4.2.6.8 and 6.1.1.4' 
  
_space_group_crystal_system       monoclinic 
_space_group_IT_number            4 
_space_group_name_H-M_alt         'P 21' 
_space_group_name_Hall            'P 2yb' 
  
_shelx_space_group_comment 
; 
The symmetry employed for this shelxl refinement is uniquely defined 
by the following loop, which should always be used as a source of 
symmetry information in preference to the above space-group names. 
They are only intended as comments. 
; 
  
loop_ 
 _space_group_symop_operation_xyz 
 'x, y, z' 
 '-x, y+1/2, -z' 
  
_cell_length_a                    5.6898(6) 
_cell_length_b                    7.6140(7) 
_cell_length_c                    11.6487(12) 
_cell_angle_alpha                 90 
_cell_angle_beta                  102.057(3) 
_cell_angle_gamma                 90 
_cell_volume                      493.51(9) 
_cell_formula_units_Z             2 
_cell_measurement_temperature     100(2) 
_cell_measurement_reflns_used     9821 
_cell_measurement_theta_min       3.88 
_cell_measurement_theta_max       74.62 
  
_exptl_crystal_description        Plate 
_exptl_crystal_colour             colourless 
_exptl_crystal_density_meas       ? 
_exptl_crystal_density_method     'not measured' 
_exptl_crystal_density_diffrn     1.394 
_exptl_crystal_F_000              220 
_exptl_transmission_factor_min    ? 
_exptl_transmission_factor_max    ? 
_exptl_crystal_size_max           0.200 
_exptl_crystal_size_mid           0.150 
_exptl_crystal_size_min           0.050 
_exptl_absorpt_coefficient_mu     0.844 
_shelx_estimated_absorpt_T_min    0.849 
_shelx_estimated_absorpt_T_max    0.959 
_exptl_absorpt_correction_type    multi-scan 
_exptl_absorpt_correction_T_min   0.6431 
_exptl_absorpt_correction_T_max   0.7538 
_exptl_absorpt_process_details    'SADABS-2016/2 (Sheldrick, 2014)' 
_exptl_absorpt_special_details    ? 
_diffrn_ambient_temperature       100(2) 
_diffrn_radiation_wavelength      1.54178 
_diffrn_radiation_type            CuK\a 
_diffrn_source                    'I\mS HB micro-focus sealed tube' 
_diffrn_measurement_device_type   'Bruker D8 VENTURE Kappa Duo PHOTON II CPAD' 
_diffrn_measurement_method        '\f and \w scans' 
_diffrn_detector_area_resol_mean  7.69 
_diffrn_reflns_number             15186 
_diffrn_reflns_av_unetI/netI      0.0284 
_diffrn_reflns_av_R_equivalents   0.0533 
_diffrn_reflns_limit_h_min        -7 
_diffrn_reflns_limit_h_max        7 
_diffrn_reflns_limit_k_min        -9 
_diffrn_reflns_limit_k_max        9 
_diffrn_reflns_limit_l_min        -14 
_diffrn_reflns_limit_l_max        14 
_diffrn_reflns_theta_min          3.880 
_diffrn_reflns_theta_max          74.614 
_diffrn_reflns_theta_full         67.679 
_diffrn_measured_fraction_theta_max   0.999 
_diffrn_measured_fraction_theta_full  1.000 
_diffrn_reflns_Laue_measured_fraction_max    0.999 
_diffrn_reflns_Laue_measured_fraction_full   1.000 
_diffrn_reflns_point_group_measured_fraction_max   0.986 
_diffrn_reflns_point_group_measured_fraction_full  0.998 
_reflns_number_total              1993 
_reflns_number_gt                 1958 
_reflns_threshold_expression      'I > 2\s(I)' 
_reflns_Friedel_coverage          0.828 
_reflns_Friedel_fraction_max      0.971 
_reflns_Friedel_fraction_full     0.996 
  
_reflns_special_details 
; 
 Reflections were merged by SHELXL according to the crystal 
 class for the calculation of statistics and refinement. 
  
 _reflns_Friedel_fraction is defined as the number of unique 
 Friedel pairs measured divided by the number that would be 
 possible theoretically, ignoring centric projections and 
 systematic absences. 
; 
  
_computing_data_collection        'APEX3 v2019.1-0 (Bruker Nano, 2019)' 
_computing_cell_refinement        'SAINT v8.40A (Bruker-AXS, 2013)' 
_computing_data_reduction         'SAINT v8.40A (Bruker-AXS, 2013)' 
_computing_structure_solution     'SHELXS-2013/1 (Sheldrick, 2015)' 
_computing_structure_refinement 'SHELXL-2018/3 (Sheldrick, 2018)' 
_computing_molecular_graphics     'Bruker SHELXTL' 
_computing_publication_material   'Bruker SHELXTL' 
_refine_special_details 
; 
 Refinement of F^2^ against ALL reflections.  The weighted R-factor wR and 
 goodness of fit S are based on F^2^, conventional R-factors R are based 
 on F, with F set to zero for negative F^2^. The threshold expression of 
 F^2^ > 2sigma(F^2^) is used only for calculating R-factors(gt) etc. and is 
 not relevant to the choice of reflections for refinement.  R-factors based 
 on F^2^ are statistically about twice as large as those based on F, and R- 
 factors based on ALL data will be even larger. 
; 
_refine_ls_structure_factor_coef  Fsqd 
_refine_ls_matrix_type            full 
_refine_ls_weighting_scheme       calc 
_refine_ls_weighting_details 
'w=1/[\s^2^(Fo^2^)+(0.0627P)^2^+0.1083P] where P=(Fo^2^+2Fc^2^)/3' 
_atom_sites_solution_primary      direct 
_atom_sites_solution_secondary    difmap 
_atom_sites_solution_hydrogens    mixed 
_refine_ls_hydrogen_treatment     mixed 
_refine_ls_extinction_method      'SHELXL-2018/3 (Sheldrick 2018)' 
_refine_ls_extinction_coef        0.014(4) 
_refine_ls_extinction_expression 
 'Fc^*^=kFc[1+0.001xFc^2^\l^3^/sin(2\q)]^-1/4^' 
_refine_ls_abs_structure_details 
; 
 Flack x determined using 882 quotients [(I+)-(I-)]/[(I+)+(I-)] 
 (Parsons, Flack and Wagner, Acta Cryst. B69 (2013) 249-259). 
; 
_refine_ls_abs_structure_Flack    0.1(2) 
_chemical_absolute_configuration  ad 
_refine_ls_number_reflns          1993 
_refine_ls_number_parameters      141 
_refine_ls_number_restraints      2 
_refine_ls_R_factor_all           0.0381 
_refine_ls_R_factor_gt            0.0375 
_refine_ls_wR_factor_ref          0.1051 
_refine_ls_wR_factor_gt           0.1046 
_refine_ls_goodness_of_fit_ref    1.143 
_refine_ls_restrained_S_all       1.142 
_refine_ls_shift/su_max           0.000 
_refine_ls_shift/su_mean          0.000 
  
loop_ 
 _atom_site_label 
 _atom_site_type_symbol 
 _atom_site_fract_x 
 _atom_site_fract_y 
 _atom_site_fract_z 
 _atom_site_U_iso_or_equiv 
 _atom_site_adp_type 
 _atom_site_occupancy 
 _atom_site_site_symmetry_order 
 _atom_site_calc_flag 
 _atom_site_refinement_flags_posn 
 _atom_site_refinement_flags_adp 
 _atom_site_refinement_flags_occupancy 
 _atom_site_disorder_assembly 
 _atom_site_disorder_group 
O1 O 0.8327(3) 0.6270(3) 0.37613(16) 0.0299(5) Uani 1 1 d . . . . . 
C1 C 0.8352(4) 0.6057(3) 0.4911(2) 0.0222(5) Uani 1 1 d . . . . . 
O2 O 0.9860(3) 0.6761(3) 0.56531(16) 0.0294(4) Uani 1 1 d . . . . . 
C2 C 0.6299(4) 0.4855(3) 0.50722(19) 0.0197(5) Uani 1 1 d . . . . . 
H2 H 0.692861 0.363128 0.521676 0.024 Uiso 1 1 calc R U . . . 
N1 N 0.5177(4) 0.5365(3) 0.60204(17) 0.0227(5) Uani 1 1 d D . . . . 
H1N H 0.361(4) 0.570(4) 0.581(3) 0.027 Uiso 1 1 d D U . . . 
C5 C 0.5966(4) 0.4798(3) 0.71759(19) 0.0195(5) Uani 1 1 d . . . . . 
C6 C 0.8143(4) 0.3949(3) 0.7576(2) 0.0220(5) Uani 1 1 d . . . . . 
H6 H 0.914732 0.369013 0.704075 0.026 Uiso 1 1 calc R U . . . 
C7 C 0.8877(4) 0.3470(4) 0.8756(2) 0.0255(5) Uani 1 1 d . . . . . 
H7 H 1.035358 0.286587 0.901428 0.031 Uiso 1 1 calc R U . . . 
C8 C 0.7438(5) 0.3880(4) 0.9551(2) 0.0268(5) Uani 1 1 d . . . . . 
O3 O 0.8024(4) 0.3530(3) 1.07384(16) 0.0412(6) Uani 1 1 d . . . . . 
C11 C 1.0466(5) 0.3249(4) 1.1248(2) 0.0290(6) Uani 1 1 d . . . . . 
H11A H 1.104340 0.220949 1.089526 0.043 Uiso 1 1 calc R U . . . 
H11B H 1.064744 0.306638 1.209500 0.043 Uiso 1 1 calc R U . . . 
H11C H 1.140538 0.427695 1.110921 0.043 Uiso 1 1 calc R U . . . 
C9 C 0.5249(4) 0.4713(4) 0.9157(2) 0.0263(5) Uani 1 1 d . . . . . 
H9 H 0.425029 0.497766 0.969337 0.032 Uiso 1 1 calc R U . . . 
C10 C 0.4514(4) 0.5159(3) 0.7984(2) 0.0233(5) Uani 1 1 d . . . . . 
H10 H 0.300328 0.571669 0.772215 0.028 Uiso 1 1 calc R U . . . 
C3 C 0.4621(4) 0.4929(3) 0.3868(2) 0.0238(5) Uani 1 1 d . . . . . 
H3A H 0.376511 0.380032 0.367462 0.029 Uiso 1 1 calc R U . . . 
H3B H 0.342734 0.588466 0.382869 0.029 Uiso 1 1 calc R U . . . 
C4 C 0.6330(5) 0.5286(4) 0.3051(2) 0.0292(6) Uani 1 1 d . . . . . 
H4A H 0.690642 0.417252 0.276888 0.035 Uiso 1 1 calc R U . . . 
H4B H 0.552567 0.598678 0.236468 0.035 Uiso 1 1 calc R U . . . 
  
loop_ 
 _atom_site_aniso_label 
 _atom_site_aniso_U_11 
 _atom_site_aniso_U_22 
 _atom_site_aniso_U_33 
 _atom_site_aniso_U_23 
 _atom_site_aniso_U_13 
 _atom_site_aniso_U_12 
O1 0.0264(9) 0.0381(11) 0.0269(9) 0.0046(7) 0.0095(7) -0.0019(8) 
C1 0.0176(10) 0.0237(11) 0.0258(11) 0.0029(9) 0.0055(9) 0.0022(9) 
O2 0.0199(8) 0.0341(10) 0.0335(9) 0.0003(8) 0.0038(7) -0.0052(7) 
C2 0.0195(10) 0.0192(11) 0.0202(11) 0.0012(8) 0.0037(8) 0.0010(8) 
N1 0.0162(9) 0.0305(11) 0.0221(10) 0.0029(8) 0.0056(8) 0.0039(8) 
C5 0.0175(10) 0.0193(11) 0.0218(11) -0.0013(9) 0.0041(8) -0.0029(9) 
C6 0.0184(11) 0.0254(11) 0.0225(11) -0.0014(9) 0.0050(9) -0.0007(9) 
C7 0.0191(11) 0.0316(13) 0.0250(12) 0.0039(10) 0.0025(9) -0.0009(9) 
C8 0.0220(12) 0.0364(13) 0.0214(11) 0.0024(10) 0.0030(9) -0.0061(10) 
O3 0.0246(9) 0.0779(17) 0.0205(9) 0.0096(9) 0.0032(7) -0.0062(10) 
C11 0.0272(13) 0.0342(13) 0.0241(11) 0.0029(10) 0.0020(10) 0.0032(11) 
C9 0.0221(12) 0.0350(13) 0.0236(11) -0.0015(10) 0.0086(9) -0.0037(11) 
C10 0.0173(11) 0.0263(12) 0.0266(12) -0.0003(10) 0.0054(9) -0.0009(9) 
C3 0.0233(12) 0.0237(12) 0.0230(11) 0.0007(9) 0.0019(9) -0.0010(9) 
C4 0.0319(13) 0.0334(13) 0.0229(11) 0.0001(10) 0.0074(10) 0.0005(11) 
  
_geom_special_details 
; 
 All esds (except the esd in the dihedral angle between two l.s. planes) 
 are estimated using the full covariance matrix.  The cell esds are taken 
 into account individually in the estimation of esds in distances, angles 
 and torsion angles; correlations between esds in cell parameters are only 
 used when they are defined by crystal symmetry.  An approximate (isotropic) 
 treatment of cell esds is used for estimating esds involving l.s. planes. 
; 
  
loop_ 
 _geom_bond_atom_site_label_1 
 _geom_bond_atom_site_label_2 
 _geom_bond_distance 
 _geom_bond_site_symmetry_2 
 _geom_bond_publ_flag 
O1 C1 1.347(3) . ? 
O1 C4 1.464(3) . ? 
C1 O2 1.208(3) . ? 
C1 C2 1.526(3) . ? 
C2 N1 1.440(3) . ? 
C2 C3 1.524(3) . ? 
C2 H2 1.0000 . ? 
N1 C5 1.395(3) . ? 
N1 H1N 0.91(2) . ? 
C5 C6 1.389(3) . ? 
C5 C10 1.403(3) . ? 
C6 C7 1.399(3) . ? 
C6 H6 0.9500 . ? 
C7 C8 1.394(4) . ? 
C7 H7 0.9500 . ? 
C8 O3 1.379(3) . ? 
C8 C9 1.388(4) . ? 
O3 C11 1.408(3) . ? 
C11 H11A 0.9800 . ? 
C11 H11B 0.9800 . ? 
C11 H11C 0.9800 . ? 
C9 C10 1.385(3) . ? 
C9 H9 0.9500 . ? 
C10 H10 0.9500 . ? 
C3 C4 1.521(3) . ? 
C3 H3A 0.9900 . ? 
C3 H3B 0.9900 . ? 
C4 H4A 0.9900 . ? 
C4 H4B 0.9900 . ? 
  
loop_ 
 _geom_angle_atom_site_label_1 
 _geom_angle_atom_site_label_2 
 _geom_angle_atom_site_label_3 
 _geom_angle 
 _geom_angle_site_symmetry_1 
 _geom_angle_site_symmetry_3 
 _geom_angle_publ_flag 
C1 O1 C4 110.26(19) . . ? 
O2 C1 O1 121.1(2) . . ? 
O2 C1 C2 128.7(2) . . ? 
O1 C1 C2 110.2(2) . . ? 
N1 C2 C3 113.78(19) . . ? 
N1 C2 C1 113.96(19) . . ? 
C3 C2 C1 102.33(19) . . ? 
N1 C2 H2 108.8 . . ? 
C3 C2 H2 108.8 . . ? 
C1 C2 H2 108.8 . . ? 
C5 N1 C2 123.48(19) . . ? 
C5 N1 H1N 116(2) . . ? 
C2 N1 H1N 116(2) . . ? 
C6 C5 N1 123.5(2) . . ? 
C6 C5 C10 118.4(2) . . ? 
N1 C5 C10 118.1(2) . . ? 
C5 C6 C7 120.9(2) . . ? 
C5 C6 H6 119.6 . . ? 
C7 C6 H6 119.6 . . ? 
C8 C7 C6 119.9(2) . . ? 
C8 C7 H7 120.0 . . ? 
C6 C7 H7 120.0 . . ? 
O3 C8 C9 115.6(2) . . ? 
O3 C8 C7 124.8(2) . . ? 
C9 C8 C7 119.6(2) . . ? 
C8 O3 C11 117.6(2) . . ? 
O3 C11 H11A 109.5 . . ? 
O3 C11 H11B 109.5 . . ? 
H11A C11 H11B 109.5 . . ? 
O3 C11 H11C 109.5 . . ? 
H11A C11 H11C 109.5 . . ? 
H11B C11 H11C 109.5 . . ? 
C10 C9 C8 120.3(2) . . ? 
C10 C9 H9 119.9 . . ? 
C8 C9 H9 119.9 . . ? 
C9 C10 C5 121.0(2) . . ? 
C9 C10 H10 119.5 . . ? 
C5 C10 H10 119.5 . . ? 
C4 C3 C2 102.9(2) . . ? 
C4 C3 H3A 111.2 . . ? 
C2 C3 H3A 111.2 . . ? 
C4 C3 H3B 111.2 . . ? 
C2 C3 H3B 111.2 . . ? 
H3A C3 H3B 109.1 . . ? 
O1 C4 C3 105.08(19) . . ? 
O1 C4 H4A 110.7 . . ? 
C3 C4 H4A 110.7 . . ? 
O1 C4 H4B 110.7 . . ? 
C3 C4 H4B 110.7 . . ? 
H4A C4 H4B 108.8 . . ? 
  
loop_ 
 _geom_torsion_atom_site_label_1 
 _geom_torsion_atom_site_label_2 
 _geom_torsion_atom_site_label_3 
 _geom_torsion_atom_site_label_4 
 _geom_torsion 
 _geom_torsion_site_symmetry_1 
 _geom_torsion_site_symmetry_2 
 _geom_torsion_site_symmetry_3 
 _geom_torsion_site_symmetry_4 
 _geom_torsion_publ_flag 
C4 O1 C1 O2 -179.9(2) . . . . ? 
C4 O1 C1 C2 0.3(3) . . . . ? 
O2 C1 C2 N1 38.2(3) . . . . ? 
O1 C1 C2 N1 -142.0(2) . . . . ? 
O2 C1 C2 C3 161.5(2) . . . . ? 
O1 C1 C2 C3 -18.8(2) . . . . ? 
C3 C2 N1 C5 154.7(2) . . . . ? 
C1 C2 N1 C5 -88.4(3) . . . . ? 
C2 N1 C5 C6 11.9(4) . . . . ? 
C2 N1 C5 C10 -170.3(2) . . . . ? 
N1 C5 C6 C7 177.6(2) . . . . ? 
C10 C5 C6 C7 -0.3(3) . . . . ? 
C5 C6 C7 C8 -1.4(4) . . . . ? 
C6 C7 C8 O3 -177.5(2) . . . . ? 
C6 C7 C8 C9 2.1(4) . . . . ? 
C9 C8 O3 C11 -159.2(3) . . . . ? 
C7 C8 O3 C11 20.4(4) . . . . ? 
O3 C8 C9 C10 178.6(2) . . . . ? 
C7 C8 C9 C10 -1.0(4) . . . . ? 
C8 C9 C10 C5 -0.7(4) . . . . ? 
C6 C5 C10 C9 1.3(3) . . . . ? 
N1 C5 C10 C9 -176.7(2) . . . . ? 
N1 C2 C3 C4 151.8(2) . . . . ? 
C1 C2 C3 C4 28.4(2) . . . . ? 
C1 O1 C4 C3 18.5(3) . . . . ? 
C2 C3 C4 O1 -29.1(2) . . . . ? 
  
loop_ 
 _geom_hbond_atom_site_label_D 
 _geom_hbond_atom_site_label_H 
 _geom_hbond_atom_site_label_A 
 _geom_hbond_distance_DH 
 _geom_hbond_distance_HA 
 _geom_hbond_distance_DA 
 _geom_hbond_angle_DHA 
 _geom_hbond_site_symmetry_A 
 _geom_hbond_publ_flag 
N1 H1N O2  0.91(2) 2.25(2) 3.150(3) 169(3) 1_455 yes 
C6 H6 O1  0.95 2.63 3.454(3) 145.9 2_746 yes 
C3 H3A N1  0.99 2.69 3.478(3) 136.7 2_646 yes 
C4 H4A O3  0.99 2.62 3.326(3) 128.3 1_554 yes 
  
_refine_diff_density_max    0.248 
_refine_diff_density_min   -0.170 
_refine_diff_density_rms    0.042 
  
_shelx_res_file 
; 
TITL V20254 in P2(1) 
    V20254.res 
    created by SHELXL-2018/3 at 11:22:00 on 01-Dec-2020 
CELL 1.54178   5.68980   7.61400  11.64870  90.0000 102.0571  90.0000 
ZERR    2.00   0.00060   0.00070   0.00120   0.0000   0.0032   0.0000 
LATT -1 
SYMM -X, 0.5+Y, -Z 
SFAC C H N O 
UNIT 22 26 2 6 
TEMP -173 
SIZE 0.05 0.15 0.20 
  
ACTA 
WPDB -2 
CONF 
  
L.S. 10 
BOND $H 
FMAP 2 
PLAN 20 
  
dfix 0.91 n1 h1n 
  
EQIV $1 x-1, y, z 
EQIV $2 -x+2, y-1/2, -z+1 
EQIV $3 -x+1, y-1/2, -z+1 
EQIV $4 x, y, z-1 
  
HTAB 
HTAB N1 O2_$1 
HTAB C6 O1_$2 
HTAB C3 N1_$3 
HTAB C4 O3_$4 
  
WGHT    0.062700    0.108300 
EXTI    0.013528 
FVAR       0.49446 
O1    4    0.832690    0.627024    0.376132    11.00000    0.02637    0.03811 = 
         0.02687    0.00461    0.00952   -0.00188 
C1    1    0.835235    0.605715    0.491139    11.00000    0.01760    0.02368 = 
         0.02579    0.00288    0.00548    0.00221 
O2    4    0.985960    0.676108    0.565305    11.00000    0.01990    0.03405 = 
         0.03346    0.00026    0.00378   -0.00518 
C2    1    0.629868    0.485518    0.507219    11.00000    0.01953    0.01921 = 
         0.02020    0.00117    0.00371    0.00101 
AFIX  13 
H2    2    0.692861    0.363128    0.521676    11.00000   -1.20000 
AFIX   0 
N1    3    0.517650    0.536494    0.602044    11.00000    0.01620    0.03054 = 
         0.02213    0.00294    0.00557    0.00386 
H1N   2    0.360974    0.569747    0.581234    11.00000   -1.20000 
C5    1    0.596613    0.479835    0.717588    11.00000    0.01751    0.01927 = 
         0.02183   -0.00135    0.00409   -0.00287 
C6    1    0.814299    0.394915    0.757568    11.00000    0.01837    0.02537 = 
         0.02252   -0.00145    0.00502   -0.00066 
AFIX  43 
H6    2    0.914732    0.369013    0.704075    11.00000   -1.20000 
AFIX   0 
C7    1    0.887691    0.346993    0.875557    11.00000    0.01909    0.03155 = 
         0.02496    0.00391    0.00253   -0.00095 
AFIX  43 
H7    2    1.035358    0.286587    0.901428    11.00000   -1.20000 
AFIX   0 
C8    1    0.743825    0.388004    0.955138    11.00000    0.02198    0.03644 = 
         0.02141    0.00235    0.00299   -0.00609 
O3    4    0.802418    0.352989    1.073843    11.00000    0.02460    0.07794 = 
         0.02052    0.00957    0.00320   -0.00619 
C11   1    1.046576    0.324934    1.124824    11.00000    0.02717    0.03422 = 
         0.02412    0.00291    0.00202    0.00317 
AFIX 137 
H11A  2    1.104340    0.220949    1.089526    11.00000   -1.50000 
H11B  2    1.064744    0.306638    1.209500    11.00000   -1.50000 
H11C  2    1.140538    0.427695    1.110921    11.00000   -1.50000 
AFIX   0 
C9    1    0.524884    0.471255    0.915684    11.00000    0.02209    0.03501 = 
         0.02358   -0.00149    0.00859   -0.00366 
AFIX  43 
H9    2    0.425029    0.497766    0.969337    11.00000   -1.20000 
AFIX   0 
C10   1    0.451362    0.515856    0.798365    11.00000    0.01731    0.02631 = 
         0.02657   -0.00031    0.00544   -0.00085 
AFIX  43 
H10   2    0.300328    0.571669    0.772215    11.00000   -1.20000 
AFIX   0 
C3    1    0.462087    0.492865    0.386808    11.00000    0.02332    0.02374 = 
         0.02303    0.00065    0.00192   -0.00097 
AFIX  23 
H3A   2    0.376511    0.380032    0.367462    11.00000   -1.20000 
H3B   2    0.342734    0.588466    0.382869    11.00000   -1.20000 
AFIX   0 
C4    1    0.632975    0.528644    0.305105    11.00000    0.03192    0.03339 = 
         0.02290    0.00012    0.00736    0.00052 
AFIX  23 
H4A   2    0.690642    0.417252    0.276888    11.00000   -1.20000 
H4B   2    0.552567    0.598678    0.236468    11.00000   -1.20000 
AFIX   0 
HKLF 4 
  
  
  
  
REM  V20254 in P2(1) 
REM wR2 = 0.105054, GooF = S = 1.14290, Restrained GooF = 1.14229 for all data 
REM R1 = 0.037515 for 1958 Fo > 4sig(Fo) and 0.038123 for all 1993 data 
REM 141 parameters refined using 2 restraints 
  
END 
  
WGHT      0.0627      0.1083 
  
REM Instructions for potential hydrogen bonds 
HTAB N1 O2_$1 
HTAB C6 O1_$2 
HTAB C3 N1_$3 
HTAB C4 O3_$4 
  
REM Highest difference peak  0.248,  deepest hole -0.170,  1-sigma level  0.042 
Q1    1   0.8350  0.2612  1.0484  11.00000  0.05    0.25 
Q2    1   1.1082  0.3325  0.9035  11.00000  0.05    0.18 
Q3    1   0.6220  0.4223  0.9268  11.00000  0.05    0.17 
Q4    1   0.6868  0.4082  0.7381  11.00000  0.05    0.17 
Q5    1   0.7142  0.5470  0.5070  11.00000  0.05    0.16 
Q6    1   0.7441  0.4315  0.5122  11.00000  0.05    0.16 
Q7    1   0.5552  0.5281  0.7606  11.00000  0.05    0.15 
Q8    1   0.7857  0.3369  0.9163  11.00000  0.05    0.15 
Q9    1   1.0824  0.2872  0.6532  11.00000  0.05    0.15 
Q10   1   0.8093  0.6590  0.6396  11.00000  0.05    0.14 
Q11   1   1.1805  0.6576  0.5836  11.00000  0.05    0.14 
Q12   1   0.8729  0.3429  0.3093  11.00000  0.05    0.13 
Q13   1   0.3905  0.4837  0.5809  11.00000  0.05    0.13 
Q14   1   0.3555  0.6027  0.5558  11.00000  0.05    0.12 
Q15   1   0.5379  0.5139  0.4492  11.00000  0.05    0.12 
Q16   1   0.8425  0.6479  0.2059  11.00000  0.05    0.12 
Q17   1   1.0035  0.6831  0.4180  11.00000  0.05    0.12 
Q18   1   0.8390  0.3867  1.0818  11.00000  0.05    0.12 
Q19   1   0.9741  0.2061  1.2014  11.00000  0.05    0.12 
Q20   1   0.7977  0.4773  0.2987  11.00000  0.05    0.12 
; 
_shelx_res_checksum   49332 
  
_shelx_hkl_file 
; 
   1   0   0   34.44    2.06 
   1   0   0   32.85    2.85 
   1   0   0   31.75    1.97 
   1   0   0   26.81    1.99 
   1   0   0   30.65    1.95 
   1   0   0   27.88    1.95 
  -1   0   0   30.83    1.94 
  -1   0   0   31.00    1.95 
  -1   0   0   30.01    2.00 
  -1   0   0   33.74    1.95 
  -1   0   0   30.41    2.81 
  -1   0   0   30.74    1.97 
  -1   0   0   31.81    2.04 
   2   0   0   82.93    5.28 
  -2   0   0   79.84    5.05 
  -2   0   0   81.43    5.06 
  -2   0   0   76.97    6.93 
  -2   0   0   85.22    5.05 
   2   0   0   83.62    7.17 
  -2   0   0   77.59    5.24 
   2   0   0   74.01    5.12 
   2   0   0   79.97    5.10 
   2   0   0   82.28    5.05 
   2   0   0   79.25    5.07 
   3   0   0  103.79    6.74 
   3   0   0  110.18    6.78 
   3   0   0  104.65    6.81 
   3   0   0  121.52    6.88 
  -3   0   0  108.51    6.76 
  -3   0   0   99.03    6.76 
  -3   0   0  109.68    6.78 
   3   0   0  118.32    7.25 
   3   0   0  115.24   10.87 
   3   0   0  105.31    6.90 
  -3   0   0  103.78    6.74 
   3   0   0  109.71    6.75 
  -3   0   0  104.70    6.92 
  -3   0   0  101.18   11.63 
  -3   0   0   97.66    7.10 
   4   0   0    2.08    0.24 
   4   0   0    2.09    0.20 
  -4   0   0    1.85    0.25 
  -4   0   0    1.83    0.38 
  -4   0   0    2.17    0.33 
  -4   0   0    2.25    0.23 
  -4   0   0    2.16    0.23 
   4   0   0    2.00    0.32 
  -4   0   0    2.13    0.26 
   4   0   0    2.29    0.19 
  -5   0   0   20.32    1.50 
   5   0   0   20.37    1.39 
   5   0   0   21.96    1.40 
  -5   0   0   22.06    1.57 
  -5   0   0   21.87    1.45 
  -5   0   0   22.48    1.42 
  -5   0   0   20.77    1.71 
   5   0   0   21.87    1.39 
   5   0   0   18.85    1.52 
   5   0   0   22.46    1.48 
   6   0   0   17.97    1.16 
   6   0   0   17.39    1.15 
  -6   0   0   17.88    1.19 
   0  -1   0    0.00    0.04 
   0  -1   0    0.07    0.04 
   0  -1   0    0.01    0.01 
   0   1   0    0.01    0.01 
   0   1   0   -0.09    0.26 
   0   1   0    0.01    0.04 
   0   1   0    0.02    0.04 
  -1  -1   0  671.35   42.06 
  -1  -1   0  646.41   43.22 
   1  -1   0  723.23   42.56 
   1  -1   0  644.21   41.98 
   1   1   0  647.85   40.78 
   1   1   0  595.11   39.58 
  -1   1   0  614.41   39.50 
  -1   1   0  673.61   40.13 
  -2  -1   0   13.93    1.16 
  -2  -1   0   14.70    0.92 
   2  -1   0   13.06    0.90 
   2  -1   0   13.21    0.93 
   2  -1   0   14.45    0.91 
   2  -1   0   16.80    2.73 
  -2  -1   0   13.39    0.94 
  -2  -1   0   13.77    0.90 
   2  -1   0   15.03    1.12 
  -2  -1   0   12.95    1.02 
   2  -1   0   15.23    0.96 
  -2  -1   0   21.63    4.07 
  -2  -1   0   14.30    0.95 
  -2   1   0   13.83    0.89 
  -2   1   0   16.18    2.92 
   2   1   0   14.79    0.96 
   2   1   0   14.13    0.93 
  -2   1   0   14.25    1.17 
  -2   1   0   13.83    1.01 
   2   1   0   13.20    0.98 
   2   1   0   13.57    0.90 
  -2   1   0   15.63    0.91 
   2   1   0   15.89    3.94 
   2   1   0   14.63    1.22 
   2   1   0   14.60    0.99 
  -2   1   0   13.47    0.90 
  -3  -1   0   27.40    1.74 
   3  -1   0   29.20    1.72 
   3  -1   0   25.02    1.87 
  -3  -1   0   27.05    1.76 
  -3  -1   0   26.09    1.77 
  -3  -1   0   25.17    2.20 
   3  -1   0   27.74    1.74 
   3  -1   0   32.74    6.34 
   3  -1   0   25.82    2.18 
   3  -1   0   27.05    1.81 
  -3  -1   0   25.11    1.73 
  -3  -1   0   30.55    7.01 
   3  -1   0   26.65    1.77 
  -3   1   0   26.62    1.88 
   3   1   0   26.88    1.78 
   3   1   0   26.92    1.82 
  -3   1   0   26.42    6.05 
   3   1   0   27.59    1.69 
   3   1   0   27.25    1.70 
   3   1   0   25.87    2.38 
   3   1   0   32.73    6.97 
   3   1   0   25.82    1.73 
  -3   1   0   23.83    2.05 
  -4  -1   0   26.99    2.14 
  -4  -1   0   27.65    1.96 
   4  -1   0   27.62    2.14 
  -4  -1   0   31.77    1.96 
  -4  -1   0   31.68    1.94 
   4  -1   0   31.99    1.90 
  -4  -1   0   30.86    2.05 
   4  -1   0   28.77    2.04 
   4  -1   0   28.37    1.90 
  -4  -1   0   28.78    1.97 
   4  -1   0   29.82    1.95 
  -4  -1   0   29.87    1.89 
  -4   1   0   27.22    1.90 
  -4   1   0   28.76    2.00 
   4   1   0   29.94    1.93 
  -4   1   0   27.44    2.12 
  -4   1   0   30.04    1.92 
   4   1   0   30.75    1.88 
   4   1   0   29.70    1.91 
   4   1   0   29.80    1.87 
  -4   1   0   30.18    2.03 
  -4   1   0   25.50    1.91 
   4   1   0   31.36    2.12 
   4   1   0   27.87    1.97 
  -4   1   0   29.97    1.90 
   5  -1   0   20.14    1.25 
   5  -1   0   19.11    1.32 
  -5  -1   0   19.52    1.28 
  -5  -1   0   18.24    1.31 
  -5  -1   0   18.65    1.29 
   5  -1   0   19.84    1.25 
  -5  -1   0   16.77    1.53 
  -5  -1   0   19.77    1.42 
   5  -1   0   16.27    1.38 
   5  -1   0   20.35    1.26 
   5   1   0   17.49    1.29 
  -5   1   0   20.77    1.40 
   5   1   0   17.57    1.32 
   5   1   0   18.96    1.19 
  -5   1   0   18.48    1.23 
  -5   1   0   18.96    1.34 
  -5   1   0   16.69    1.48 
  -5   1   0   19.47    1.26 
  -5   1   0   16.35    1.22 
   5   1   0   16.55    1.19 
   6  -1   0    9.65    0.68 
  -6  -1   0   10.92    0.74 
   6  -1   0    9.96    0.69 
  -6  -1   0    9.96    0.74 
   6  -1   0   10.49    0.68 
  -6   1   0    7.74    0.62 
   6   1   0    8.83    0.59 
   6   1   0    9.63    0.60 
  -6   1   0    8.94    0.68 
   0  -2   0  507.82   31.82 
   0  -2   0  472.00   31.87 
   0  -2   0  551.67   32.48 
   0   2   0  579.95   36.79 
  -1  -2   0  965.33   59.60 
  -1  -2   0  936.18   61.17 
   1   2   0  982.39   62.06 
   1   2   0 1000.00   63.57 
  -2  -2   0   75.73    5.25 
   2  -2   0   79.92    5.14 
   2  -2   0   80.16    5.12 
  -2  -2   0   84.42    5.47 
  -2  -2   0   73.23    5.20 
  -2  -2   0   83.06    8.51 
   2  -2   0   84.59    5.18 
  -2  -2   0   85.22    5.19 
   2  -2   0   90.61    5.25 
   2  -2   0   85.05    6.32 
   2  -2   0   82.22    5.12 
  -2  -2   0   77.85    5.17 
  -2   2   0   75.14    5.04 
  -2   2   0   77.96    4.94 
   2   2   0   74.18    4.81 
   2   2   0   79.48    5.18 
  -2   2   0   77.43    4.81 
   2   2   0   71.49    4.83 
  -2   2   0   81.47    6.22 
   2   2   0   78.40    4.87 
   2   2   0   81.19    7.89 
   3  -2   0   21.84    7.85 
   3  -2   0   35.19    2.22 
  -3  -2   0   33.36    2.20 
  -3  -2   0   34.94    2.86 
   3  -2   0   31.44    2.31 
  -3  -2   0   33.56    2.12 
   3  -2   0   32.32    2.11 
  -3  -2   0   31.67    2.15 
   3  -2   0   32.37    2.18 
  -3  -2   0   33.89    2.16 
  -3  -2   0   58.62   10.94 
   3  -2   0   32.39    2.13 
  -3  -2   0   33.48    2.12 
   3  -2   0   35.67    2.15 
   3   2   0   31.94    2.88 
  -3   2   0   30.42    1.97 
   3   2   0   31.34    2.00 
   3   2   0   28.28    2.06 
   3   2   0   30.17    1.96 
   3   2   0   32.36    2.04 
  -3   2   0   32.30    2.16 
  -3   2   0   31.15    6.05 
   3   2   0   36.24    8.38 
   3   2   0   30.55    1.97 
  -4  -2   0    1.93    0.29 
   4  -2   0    1.42    0.28 
   4  -2   0    1.86    0.18 
  -4  -2   0    1.57    0.26 
  -4  -2   0    1.64    0.27 
  -4  -2   0    1.58    0.18 
   4  -2   0    1.62    0.41 
  -4  -2   0    1.73    0.24 
   4  -2   0    1.45    0.16 
   4  -2   0    1.79    0.17 
   4  -2   0    1.52    0.20 
  -4   2   0    1.47    0.22 
   4   2   0    1.92    0.29 
   4   2   0    1.11    0.20 
   4   2   0    1.43    0.15 
   4   2   0    1.48    0.24 
  -4   2   0    1.54    0.19 
  -4   2   0    1.74    0.31 
  -4   2   0    1.63    0.24 
  -4   2   0    1.61    0.29 
  -4   2   0    1.53    0.34 
   4   2   0    1.62    0.35 
   4   2   0    1.59    0.18 
  -5  -2   0    1.01    0.35 
   5  -2   0    1.52    0.18 
  -5  -2   0    1.16    0.15 
   5  -2   0    1.52    0.17 
   5  -2   0    1.59    0.22 
  -5  -2   0    1.61    0.25 
  -5  -2   0    1.73    0.24 
   5  -2   0    1.39    0.17 
  -5  -2   0    1.23    0.25 
   5   2   0    1.09    0.13 
   5   2   0    1.02    0.25 
  -5   2   0    1.64    0.34 
   5   2   0    1.50    0.27 
  -5   2   0    1.52    0.30 
  -5   2   0    1.48    0.24 
   5   2   0    1.31    0.16 
  -5   2   0    1.26    0.21 
  -5   2   0    1.56    0.19 
   6  -2   0   15.97    1.07 
  -6  -2   0   18.17    1.14 
  -6  -2   0   17.61    1.17 
   6  -2   0   15.87    1.07 
   6  -2   0   14.92    1.07 
   6   2   0   16.92    0.97 
  -6   2   0   13.97    1.05 
  -6   2   0   13.22    1.10 
  -6   2   0   14.54    0.98 
   0  -3   0    0.03    0.03 
   0  -3   0    0.03    0.07 
   0  -3   0   -0.02    0.04 
   0  -3   0    0.12    0.92 
   0  -3   0   -0.02    0.12 
   0  -3   0   -0.01    0.03 
   0   3   0    0.12    0.89 
   0   3   0    0.08    0.10 
   0   3   0    0.03    0.12 
  -1  -3   0   72.41    4.30 
  -1  -3   0   63.60    4.32 
  -1  -3   0   68.93    4.38 
  -1  -3   0   66.00    4.27 
  -1  -3   0   67.62    4.37 
  -1  -3   0   63.89    6.46 
  -1  -3   0   72.00    4.52 
   1   3   0   71.28    4.33 
   1   3   0   59.78    6.22 
   1   3   0   66.76    4.54 
  -1   3   0   68.41    4.33 
  -1   3   0   66.45    4.51 
   1   3   0   72.95    4.33 
  -2  -3   0  150.27   10.00 
  -2  -3   0  165.68    9.87 
   2  -3   0  163.18    9.91 
  -2  -3   0  158.14   14.19 
  -2  -3   0  153.03    9.83 
  -2  -3   0  157.13    9.94 
  -2  -3   0  152.46    9.90 
  -2  -3   0  158.11    9.84 
   2  -3   0  147.53    9.82 
   2  -3   0  166.01    9.83 
  -2  -3   0  155.32   10.24 
  -2   3   0  162.98    9.90 
   2   3   0  157.96    9.79 
   2   3   0  151.10    9.78 
   2   3   0  155.29    9.77 
   2   3   0  151.01   13.64 
   2   3   0  133.91    9.77 
  -2   3   0  157.82    9.77 
   2   3   0  177.58   10.43 
  -3  -3   0   16.87    1.15 
  -3  -3   0   17.59    1.11 
   3  -3   0   16.95    1.09 
  -3  -3   0   17.02    1.12 
  -3  -3   0   16.94    1.16 
   3  -3   0   18.26    1.17 
   3  -3   0   17.02    1.20 
  -3  -3   0   17.39    1.34 
  -3  -3   0   16.36    1.23 
   3  -3   0   14.39    1.29 
  -3  -3   0   17.85    1.12 
   3   3   0   17.64    1.16 
  -3   3   0   14.60    1.14 
   3   3   0   18.31    1.25 
  -3   3   0   16.99    1.23 
   3   3   0   16.68    1.15 
  -3   3   0   15.33    1.13 
   3   3   0   16.85    1.08 
  -3   3   0   16.87    1.28 
  -3   3   0   17.14    1.23 
  -4  -3   0   23.81    1.53 
  -4  -3   0   23.33    1.65 
  -4  -3   0   21.71    1.62 
  -4  -3   0   23.86    1.67 
  -4  -3   0   25.11    1.55 
   4  -3   0   24.72    1.58 
  -4  -3   0   22.24    1.70 
  -4  -3   0   24.16    1.59 
   4  -3   0   22.41    1.84 
   4  -3   0   24.00    1.54 
   4  -3   0   24.64    1.53 
  -4   3   0   24.85    1.71 
   4   3   0   21.19    1.61 
  -4   3   0   24.95    1.72 
  -4   3   0   24.89    1.60 
   4   3   0   23.80    1.53 
  -4   3   0   22.27    1.60 
   4   3   0   25.47    1.69 
  -4   3   0   21.92    1.79 
   5  -3   0    8.57    0.58 
  -5  -3   0    8.25    0.67 
  -5  -3   0    6.30    1.10 
   5  -3   0    7.66    0.64 
  -5  -3   0    9.21    0.77 
  -5  -3   0    9.04    0.59 
   5  -3   0    9.04    0.60 
  -5  -3   0    9.01    0.65 
  -5   3   0    8.02    0.84 
   5   3   0    7.73    0.54 
  -5   3   0    7.06    0.60 
   5   3   0    8.39    0.64 
  -5   3   0    7.73    0.72 
  -5   3   0    8.84    0.72 
  -5   3   0    8.06    0.62 
   5   3   0    7.48    0.66 
  -5   3   0    8.20    0.61 
  -6  -3   0    8.11    0.57 
  -6  -3   0    7.61    0.55 
   6  -3   0    7.20    0.52 
   6  -3   0    8.12    0.54 
  -6   3   0    6.95    0.58 
  -6   3   0    7.56    0.54 
  -6   3   0    8.35    0.64 
   0  -4   0   14.17    0.82 
   0  -4   0   12.11    0.83 
   0  -4   0   12.83    0.97 
   0  -4   0   11.17    0.86 
   0   4   0   13.14    1.63 
   0   4   0   13.53    0.90 
  -1  -4   0  333.09   21.33 
  -1  -4   0  340.44   21.46 
  -1  -4   0  349.48   21.46 
  -1  -4   0  314.84   21.38 
   1  -4   0  358.20   21.43 
  -1  -4   0  341.27   21.32 
   1  -4   0  307.73   21.40 
  -1  -4   0  360.02   21.35 
  -1  -4   0  322.58   21.57 
   1  -4   0  381.59   21.42 
   1   4   0  322.25   21.16 
  -1   4   0  340.26   20.91 
   1   4   0  345.66   20.92 
   1   4   0  323.89   23.43 
   2  -4   0  151.08    9.25 
  -2  -4   0  147.58    9.26 
  -2  -4   0  154.29    9.38 
  -2  -4   0  154.01    9.23 
   2  -4   0  161.74    9.41 
   2  -4   0  140.61    9.19 
  -2  -4   0  135.37    9.41 
  -2  -4   0  140.66    9.30 
   2  -4   0  148.58    9.32 
  -2  -4   0  128.08    9.88 
  -2  -4   0  150.50    9.22 
   2   4   0  151.08    9.17 
  -2   4   0  146.73    9.10 
  -2   4   0  129.68    9.13 
  -2   4   0  144.79    9.22 
   2   4   0  156.85    9.09 
   2   4   0  150.17    9.11 
  -2   4   0  142.06    9.20 
  -2   4   0  151.98    9.25 
   2   4   0  130.33    9.12 
  -3  -4   0   20.46    1.38 
  -3  -4   0   20.03    1.42 
   3  -4   0   22.05    1.37 
   3  -4   0   21.49    1.63 
  -3  -4   0   21.11    1.37 
  -3  -4   0   22.66    1.39 
  -3  -4   0   20.26    1.54 
  -3  -4   0   19.98    1.49 
  -3  -4   0   20.85    1.43 
  -3   4   0   18.94    1.37 
  -3   4   0   21.95    1.38 
   3   4   0   19.49    1.37 
   3   4   0   17.33    1.33 
   3   4   0   20.33    1.35 
  -3   4   0   21.46    1.53 
  -3   4   0   21.91    1.48 
  -3   4   0   21.37    1.48 
  -3   4   0   19.62    1.41 
   3   4   0   20.66    1.41 
  -3   4   0   18.74    1.35 
   4  -4   0    2.98    0.28 
  -4  -4   0    3.02    0.27 
  -4  -4   0    3.07    0.29 
   4  -4   0    3.13    0.24 
  -4  -4   0    2.97    0.42 
  -4  -4   0    2.99    0.34 
  -4  -4   0    3.40    0.28 
  -4  -4   0    3.20    0.35 
  -4   4   0    3.17    0.32 
  -4   4   0    3.26    0.42 
   4   4   0    2.36    0.30 
  -4   4   0    2.76    0.32 
  -4   4   0    3.03    0.42 
  -4   4   0    3.21    0.47 
  -4   4   0    2.82    0.31 
   4   4   0    2.74    0.34 
  -5  -4   0    7.97    0.66 
   5  -4   0    9.23    0.63 
  -5  -4   0    8.84    0.60 
   5  -4   0    8.21    0.58 
  -5  -4   0    9.19    0.65 
  -5   4   0    9.85    0.78 
  -5   4   0    8.49    0.64 
   5   4   0    8.30    0.67 
  -5   4   0    9.46    0.76 
  -5   4   0    7.94    0.65 
  -6  -4   0    2.39    0.22 
  -6  -4   0    2.29    0.22 
   6  -4   0    2.38    0.18 
  -6   4   0    1.84    0.23 
   6   4   0    2.06    0.21 
  -6   4   0    2.56    0.22 
   0  -5   0    0.15    0.13 
   0  -5   0    0.08    0.12 
   0   5   0    0.05    0.07 
   0   5   0   -0.01    0.14 
   0   5   0    0.13    0.09 
   0   5   0   -0.01    0.15 
   0   5   0    0.01    0.10 
  -1  -5   0   17.83    1.08 
   1  -5   0   13.90    1.15 
   1  -5   0   14.00    1.13 
  -1  -5   0   15.89    1.22 
  -1  -5   0   17.65    1.06 
  -1  -5   0   17.86    1.10 
   1  -5   0   17.18    1.18 
  -1   5   0   15.69    1.13 
  -1   5   0   18.46    1.28 
   1   5   0   16.36    1.14 
   1   5   0   15.32    1.16 
  -1   5   0   17.88    1.15 
   1   5   0   17.72    1.14 
  -1   5   0   14.48    1.13 
   1   5   0   15.78    1.15 
  -1   5   0   18.61    1.27 
  -1   5   0   17.59    1.22 
  -1   5   0   17.99    1.16 
  -1   5   0   18.01    1.16 
  -1   5   0   15.76    1.21 
  -2  -5   0   45.31    2.96 
  -2  -5   0   45.21    2.76 
   2  -5   0   45.30    3.10 
  -2  -5   0   43.30    2.80 
  -2  -5   0   47.47    2.78 
   2  -5   0   41.32    2.92 
   2  -5   0   42.54    2.87 
  -2  -5   0   37.12    2.95 
  -2  -5   0   41.94    2.77 
  -2   5   0   36.16    2.68 
  -2   5   0   39.31    2.70 
  -2   5   0   41.59    2.70 
  -2   5   0   45.81    2.73 
  -2   5   0   44.81    2.81 
  -2   5   0   40.53    2.76 
  -2   5   0   41.12    2.80 
   2   5   0   40.45    2.69 
  -2   5   0   42.86    2.69 
   2   5   0   43.11    2.75 
   2   5   0   45.21    2.70 
   2   5   0   40.22    2.71 
  -2   5   0   46.01    2.86 
  -2   5   0   39.49    2.71 
   2   5   0   39.90    2.69 
   3  -5   0   11.11    0.77 
  -3  -5   0   11.89    0.82 
  -3  -5   0   11.67    0.80 
  -3  -5   0   10.55    0.99 
   3  -5   0   12.06    1.38 
  -3  -5   0   12.37    0.92 
  -3  -5   0   11.67    0.85 
  -3  -5   0   14.00    1.04 
  -3  -5   0   11.12    0.95 
  -3   5   0    9.02    0.72 
  -3   5   0    9.92    0.79 
  -3   5   0   10.62    0.78 
  -3   5   0   11.64    0.78 
   3   5   0    8.62    0.83 
   3   5   0    9.66    0.73 
  -3   5   0   10.07    0.75 
  -3   5   0   11.13    0.88 
   3   5   0   11.03    0.83 
  -3   5   0   11.53    0.88 
   3   5   0   10.37    0.76 
  -4  -5   0   12.18    0.87 
  -4  -5   0   10.95    0.98 
   4  -5   0   12.21    0.78 
  -4  -5   0   12.34    0.81 
   4  -5   0   12.74    0.80 
  -4  -5   0   11.42    0.82 
  -4  -5   0   11.43    0.83 
  -4   5   0   11.90    0.99 
  -4   5   0   11.81    0.86 
  -4   5   0   11.45    1.05 
  -4   5   0   11.83    0.86 
  -4   5   0   12.66    0.91 
   4   5   0   12.17    0.91 
  -4   5   0   12.75    0.99 
  -5  -5   0    2.03    0.23 
  -5  -5   0    2.09    0.21 
   5  -5   0    1.62    0.17 
   5  -5   0    1.95    0.16 
  -5   5   0    2.00    0.28 
  -5   5   0    1.70    0.20 
  -5   5   0    2.16    0.24 
   5   5   0    2.29    0.28 
   0  -6   0   80.89    5.06 
   0  -6   0   79.23    5.08 
   0  -6   0   81.21    5.27 
   0   6   0   76.29    5.51 
   0   6   0   94.12    5.44 
   0   6   0   76.21    5.35 
   0   6   0   86.78    5.46 
   0   6   0   87.10    5.37 
  -1  -6   0    4.86    0.54 
  -1  -6   0    5.42    0.37 
   1  -6   0    3.66    0.52 
   1  -6   0    5.57    0.54 
  -1  -6   0    4.92    0.37 
  -1  -6   0    4.41    0.39 
  -1   6   0    4.02    0.38 
  -1   6   0    4.29    0.46 
  -1   6   0    4.97    0.40 
  -1   6   0    4.43    0.46 
   1   6   0    4.76    0.42 
   1   6   0    5.26    0.47 
   1   6   0    4.70    0.40 
  -1   6   0    4.68    0.42 
   1   6   0    4.46    0.40 
  -1   6   0    4.52    0.40 
  -1   6   0    4.84    0.43 
   1   6   0    4.40    0.44 
  -1   6   0    4.96    0.50 
  -1   6   0    4.43    0.42 
  -2  -6   0   53.66    3.32 
  -2  -6   0   51.04    3.32 
  -2  -6   0   46.66    3.55 
  -2  -6   0   51.92    3.36 
  -2  -6   0   55.87    3.31 
  -2   6   0   46.61    3.11 
   2   6   0   47.87    3.08 
   2   6   0   52.68    3.19 
   2   6   0   46.74    3.13 
  -2   6   0   45.03    3.17 
  -2   6   0   45.35    3.20 
  -2   6   0   45.31    3.10 
  -2   6   0   47.65    3.11 
  -2   6   0   55.22    3.24 
  -2   6   0   50.84    3.13 
  -2   6   0   50.21    3.13 
  -2   6   0   45.97    3.26 
  -2   6   0   46.16    3.12 
   2   6   0   51.63    3.18 
   2   6   0   44.94    3.10 
  -3  -6   0    2.08    0.24 
  -3  -6   0    1.94    0.28 
  -3  -6   0    1.84    0.38 
  -3  -6   0    1.94    0.22 
  -3  -6   0    2.19    0.29 
  -3   6   0    2.32    0.51 
  -3   6   0    1.19    0.25 
  -3   6   0    2.06    0.35 
   3   6   0    1.59    0.26 
   3   6   0    1.78    0.32 
  -3   6   0    1.82    0.27 
   3   6   0    1.83    0.31 
  -3   6   0    2.02    0.42 
  -3   6   0    1.56    0.20 
   3   6   0    1.65    0.21 
  -4  -6   0    6.32    0.49 
  -4  -6   0    6.85    0.56 
  -4  -6   0    6.74    0.49 
  -4  -6   0    6.53    0.48 
  -4   6   0    6.52    0.59 
   4   6   0    6.23    0.50 
  -4   6   0    6.71    0.51 
   4   6   0    6.36    0.53 
  -4   6   0    6.22    0.52 
  -4   6   0    7.39    0.61 
  -5  -6   0    1.29    0.13 
  -5  -6   0    1.34    0.16 
  -5   6   0    1.51    0.17 
  -5   6   0    1.17    0.20 
   5   6   0    1.30    0.15 
   0  -7   0   -0.07    0.05 
   0  -7   0    0.00    0.07 
   0   7   0    0.13    0.12 
   0   7   0    0.07    0.12 
   0   7   0   -0.21    0.08 
   0   7   0    0.01    0.09 
   0   7   0    0.02    0.14 
   0   7   0    0.01    0.11 
  -1  -7   0    9.69    0.75 
  -1  -7   0   11.10    0.74 
  -1  -7   0   10.87    0.72 
   1   7   0   10.59    0.75 
  -1   7   0   10.68    0.82 
   1   7   0    9.94    0.78 
  -1   7   0   10.55    0.77 
  -1   7   0   10.37    0.76 
   1   7   0   10.23    0.77 
   1   7   0   10.22    0.74 
  -1   7   0    9.59    0.73 
  -1   7   0    8.41    0.74 
   1   7   0   10.46    0.81 
  -1   7   0    9.46    0.73 
  -2  -7   0    0.76    0.13 
  -2  -7   0    0.94    0.15 
  -2  -7   0    0.52    0.15 
  -2  -7   0    0.92    0.15 
  -2   7   0    0.75    0.20 
   2   7   0    0.73    0.21 
   2   7   0    0.81    0.18 
  -2   7   0    0.50    0.12 
   2   7   0    0.85    0.18 
  -2   7   0    0.68    0.20 
   2   7   0    0.91    0.12 
  -2   7   0    0.56    0.19 
  -2   7   0    0.70    0.16 
  -2   7   0    0.80    0.17 
  -2   7   0    0.68    0.15 
  -2   7   0    0.46    0.13 
   2   7   0    0.51    0.18 
   2   7   0    0.76    0.16 
  -3  -7   0    2.16    0.32 
  -3  -7   0    2.76    0.30 
  -3  -7   0    3.10    0.27 
  -3  -7   0    3.17    0.28 
  -3   7   0    2.64    0.27 
  -3   7   0    2.62    0.35 
  -3   7   0    2.62    0.29 
   3   7   0    2.86    0.25 
   3   7   0    3.26    0.33 
   3   7   0    2.78    0.29 
  -3   7   0    2.83    0.28 
  -3   7   0    2.56    0.26 
   3   7   0    2.95    0.32 
  -4  -7   0    5.67    0.44 
  -4  -7   0    5.79    0.41 
  -4  -7   0    6.00    0.41 
  -4   7   0    5.00    0.46 
   4   7   0    5.54    0.38 
   0  -8   0   23.56    1.52 
   0  -8   0   23.36    1.51 
   0   8   0   20.26    1.38 
   0   8   0   20.22    1.35 
   0   8   0   21.59    1.43 
   0   8   0   20.72    1.38 
   0   8   0   17.97    1.33 
  -1  -8   0    9.39    0.60 
  -1  -8   0    7.53    0.59 
  -1  -8   0    8.63    0.62 
   1   8   0    8.50    0.60 
  -1   8   0    8.65    0.62 
  -1   8   0    8.77    0.60 
  -1   8   0    8.14    0.61 
   1   8   0    7.34    0.63 
   1   8   0    7.23    0.59 
  -1   8   0    8.71    0.63 
   1   8   0    7.19    0.65 
  -1   8   0    8.29    0.66 
   1   8   0    8.20    0.62 
  -2  -8   0    3.45    0.31 
  -2  -8   0    3.34    0.26 
  -2  -8   0    3.19    0.27 
  -2  -8   0    3.09    0.26 
  -2   8   0    2.96    0.28 
  -2   8   0    2.36    0.24 
   2   8   0    2.25    0.29 
  -2   8   0    2.49    0.27 
   2   8   0    2.45    0.31 
   2   8   0    2.69    0.28 
   2   8   0    3.02    0.26 
   2   8   0    2.06    0.28 
  -3  -8   0   11.41    0.74 
  -3  -8   0   10.91    0.73 
  -3  -8   0   10.36    0.72 
  -3   8   0    7.95    0.56 
   3   8   0    7.09    0.55 
  -3   8   0    8.47    0.58 
   3   8   0    7.82    0.58 
   0   9   0    0.05    0.08 
   0   9   0    0.00    0.08 
   0   9   0    0.02    0.07 
   0   9   0    0.00    0.08 
  -1  -9   0    6.52    0.45 
  -1   9   0    5.79    0.42 
  -1   9   0    4.84    0.42 
   1   9   0    5.70    0.44 
   1   9   0    6.13    0.41 
   1   9   0    5.86    0.41 
  -1   9   0    4.65    0.40 
   2   9   0    1.06    0.14 
   2   9   0    0.90    0.13 
   7   0  -1    1.17    0.10 
  -6   0   1   18.31    1.56 
   6   0  -1   22.08    1.42 
   6   0  -1   24.47    1.40 
   5   0  -1    0.11    0.09 
  -5   0   1    0.14    0.15 
  -5   0   1    0.21    0.12 
   5   0  -1    0.16    0.08 
  -5   0   1    0.26    0.24 
  -5   0   1    0.06    0.23 
   5   0  -1    0.19    0.09 
   5   0  -1    0.16    0.11 
   5   0  -1    0.16    0.15 
  -5   0   1    0.23    0.16 
  -5   0   1    0.24    0.10 
   4   0  -1   15.76    1.11 
   4   0  -1   16.26    1.31 
  -4   0   1   16.17    1.08 
   4   0  -1   17.14    1.07 
   4   0  -1   16.42    1.07 
  -4   0   1   17.32    1.10 
  -4   0   1   16.42    1.20 
  -4   0   1   16.74    1.12 
  -4   0   1   14.08    1.11 
   4   0  -1   16.41    1.21 
  -4   0   1   15.40    1.29 
   3   0  -1    3.05    0.37 
  -3   0   1   -1.81    4.06 
   3   0  -1    3.11    0.24 
  -3   0   1    3.18    0.26 
  -3   0   1    2.76    0.37 
   3   0  -1    2.81    4.48 
   3   0  -1    3.33    0.79 
   3   0  -1    3.11    0.31 
  -3   0   1    2.63    0.26 
  -3   0   1    2.75    0.61 
  -3   0   1    3.35    0.28 
   3   0  -1    3.44    0.27 
  -2   0   1   15.67    0.95 
   2   0  -1   14.09    2.82 
   2   0  -1   14.44    0.97 
  -2   0   1   13.89    1.02 
   2   0  -1   14.33    0.94 
  -2   0   1   14.43    0.93 
  -2   0   1   14.79    0.95 
   2   0  -1   13.86    1.01 
  -2   0   1   13.85    1.14 
   2   0  -1   14.41    0.96 
  -2   0   1   15.84    2.91 
   2   0  -1   14.44    0.96 
   2   0  -1   14.79    1.17 
   2   0  -1   14.03    0.92 
   1   0  -1   63.08    4.02 
   1   0  -1   61.38    4.03 
   1   0  -1   59.40    4.01 
  -1   0   1   60.54    4.06 
  -1   0   1   64.98    4.01 
  -1   0   1   63.35    4.03 
  -1   0   1   66.98    4.03 
   1   0  -1   58.17    4.05 
  -1   0   1   68.39    4.12 
   1   0  -1   70.85    4.12 
  -1   0   1   67.11    4.99 
   1   0  -1   66.23    5.01 
  -1   0   1   65.53    4.02 
   0   0   1   79.71    4.84 
   0   0  -1   77.52    4.82 
   0   0  -1   70.66    4.81 
   0   0   1   70.14    4.81 
   0   0  -1   74.14    4.82 
   0   0   1   77.42    4.81 
   0   0   1   77.89    4.81 
   0   0   1   79.21    4.82 
   0   0   1   84.34    5.25 
   0   0  -1   76.31    4.81 
   0   0  -1   79.02    4.84 
   0   0  -1   75.10    4.80 
   0   0  -1   71.17    4.81 
   0   0  -1   81.33    5.24 
   0   0   1   81.75    4.82 
   1   0   1   17.98    1.39 
   1   0   1   22.73    1.38 
  -1   0  -1   19.64    2.36 
  -1   0  -1   21.60    1.40 
   1   0   1   21.16    1.34 
  -1   0  -1   20.81    1.34 
  -1   0  -1   20.83    1.35 
  -1   0  -1   23.38    1.46 
   1   0   1   24.00    2.34 
   1   0   1   20.46    1.36 
   1   0   1   21.09    1.46 
  -2   0  -1   91.14    5.67 
  -2   0  -1   92.04    5.86 
  -2   0  -1   83.55    5.76 
   2   0   1   92.12    5.91 
   2   0   1   90.11    5.66 
   2   0   1   92.50    7.81 
   2   0   1   91.31    5.68 
  -2   0  -1   86.58    5.64 
  -2   0  -1   92.22    5.65 
  -2   0  -1   90.45    8.08 
   2   0   1   85.48    5.63 
   2   0   1   93.48    5.71 
  -3   0  -1   60.52    3.79 
   3   0   1   59.54    8.35 
   3   0   1   63.40    3.90 
   3   0   1   58.53    3.84 
  -3   0  -1   68.81    9.69 
   3   0   1   61.09    4.34 
  -3   0  -1   59.34    3.81 
   3   0   1   60.67    3.81 
   3   0   1   56.46    3.92 
   3   0   1   57.32    3.76 
   4   0   1    1.64    0.17 
   4   0   1    1.60    0.28 
   4   0   1    1.59    0.36 
   4   0   1    1.56    0.34 
  -4   0  -1    1.66    0.21 
  -4   0  -1    1.47    0.22 
   4   0   1    1.64    0.23 
  -4   0  -1    2.16    0.34 
   4   0   1    1.76    0.18 
   4   0   1    1.60    0.17 
  -4   0  -1    1.75    0.22 
  -4   0  -1    1.97    0.31 
  -4   0  -1    1.50    0.22 
   5   0   1   32.35    2.08 
  -5   0  -1   29.89    2.01 
  -5   0  -1   28.09    2.19 
  -5   0  -1   26.08    2.27 
  -5   0  -1   35.38    2.19 
  -5   0  -1   31.74    2.03 
   5   0   1   28.61    2.12 
   5   0   1   33.55    1.99 
   6   0   1   17.02    1.12 
   6   0   1   16.98    1.11 
   6   0   1   17.36    1.12 
  -6   0  -1   19.07    1.16 
  -6   0  -1   15.58    1.12 
   7  -1  -1    2.43    0.20 
  -7  -1   1    3.20    0.22 
   7   1  -1    2.32    0.16 
   6  -1  -1    1.56    0.17 
   6  -1  -1    1.67    0.19 
  -6  -1   1    1.83    0.23 
   6   1  -1    1.19    0.16 
  -6   1   1    1.35    0.25 
   6   1  -1    1.43    0.14 
  -6   1   1    1.50    0.28 
   6   1  -1    1.28    0.15 
   5  -1  -1   15.60    1.05 
  -5  -1   1   13.64    1.25 
   5  -1  -1   15.92    0.98 
  -5  -1   1   15.17    1.00 
  -5  -1   1   13.82    1.06 
  -5  -1   1   14.79    1.04 
   5  -1  -1   15.52    0.97 
   5  -1  -1   13.34    1.10 
  -5  -1   1   12.15    1.09 
  -5  -1   1   15.19    1.03 
   5  -1  -1   14.59    0.98 
   5   1  -1   15.62    0.98 
  -5   1   1   15.95    1.06 
   5   1  -1   14.42    1.08 
   5   1  -1   14.57    1.11 
  -5   1   1   15.05    1.14 
   5   1  -1   15.96    1.00 
  -5   1   1   15.08    1.16 
   5   1  -1   14.24    0.98 
  -5   1   1   14.89    1.03 
  -5   1   1   13.44    1.26 
  -5   1   1   13.58    1.02 
   4  -1  -1    7.13    0.61 
   4  -1  -1    7.29    0.53 
  -4  -1   1    6.75    0.58 
  -4  -1   1    7.42    0.55 
   4  -1  -1    6.77    0.72 
  -4  -1   1    8.23    0.59 
   4  -1  -1    7.73    0.52 
  -4  -1   1    7.46    0.51 
  -4  -1   1    6.59    0.72 
   4  -1  -1    8.30    0.53 
   4  -1  -1    7.43    0.56 
  -4  -1   1    7.44    0.59 
  -4   1   1    6.99    0.72 
  -4   1   1    7.70    0.65 
  -4   1   1    6.68    0.55 
  -4   1   1    7.81    0.60 
  -4   1   1    7.65    0.57 
   4   1  -1    7.13    0.50 
   4   1  -1    6.70    0.67 
   4   1  -1    7.21    0.56 
  -4   1   1    6.54    0.54 
   4   1  -1    7.56    0.50 
   4   1  -1    7.84    0.51 
   4   1  -1    7.28    0.60 
  -4   1   1    6.85    0.63 
  -4   1   1    6.48    0.51 
  -3  -1   1    8.71    0.59 
  -3  -1   1    9.04    5.72 
  -3  -1   1    8.42    1.18 
  -3  -1   1    8.63    0.65 
   3  -1  -1    8.33    0.74 
   3  -1  -1    9.07    0.61 
   3  -1  -1   15.57    4.74 
  -3  -1   1    8.76    0.62 
   3  -1  -1    8.95    0.58 
   3  -1  -1    9.10    1.12 
   3  -1  -1    8.78    0.61 
  -3  -1   1    9.09    0.65 
   3  -1  -1    9.31    0.66 
  -3  -1   1    7.44    0.68 
   3   1  -1    8.78    0.59 
  -3   1   1    9.93    1.06 
   3   1  -1    8.46    0.58 
   3   1  -1    8.22    0.65 
  -3   1   1    8.96    4.25 
   3   1  -1   11.34    1.39 
   3   1  -1    8.61    5.17 
   3   1  -1    8.95    0.79 
   3   1  -1    8.79    0.62 
  -2  -1   1  168.12   10.80 
  -2  -1   1  173.12   10.82 
   2  -1  -1  190.26   12.63 
   2  -1  -1  164.65   10.77 
   2  -1  -1  178.87   10.89 
  -2  -1   1  185.82   11.07 
  -2  -1   1  171.37   10.78 
  -2  -1   1  162.33   10.82 
  -2  -1   1  186.55   13.38 
   2  -1  -1  176.39   10.79 
   2  -1  -1  166.67   10.79 
   2  -1  -1  146.89   10.84 
  -2  -1   1  184.96   10.83 
  -2   1   1  165.93   11.43 
  -2   1   1  152.50   11.37 
   2   1  -1  184.62   16.93 
  -2   1   1  198.62   11.34 
   2   1  -1  170.01   11.33 
   2   1  -1  189.30   11.41 
   2   1  -1  179.08   11.35 
  -2   1   1  178.84   12.92 
  -2   1   1  201.16   11.33 
  -2   1   1  178.14   11.33 
   2   1  -1  190.15   11.62 
   2   1  -1  187.68   11.37 
  -1  -1   1  206.10   11.95 
   1  -1  -1  186.09   12.51 
  -1  -1   1  172.90   11.83 
   1  -1  -1  187.75   11.81 
  -1  -1   1  183.12   11.84 
   1  -1  -1  181.68   11.83 
  -1  -1   1  185.43   11.81 
   1  -1  -1  194.57   11.78 
   1  -1  -1  183.24   11.78 
  -1  -1   1  200.32   13.15 
   1  -1  -1  175.79   11.79 
  -1  -1   1  201.61   11.80 
  -1  -1   1  196.97   11.82 
   1   1  -1  201.58   13.88 
  -1   1   1  209.82   12.58 
  -1   1   1  197.94   13.13 
   1   1  -1  206.12   12.60 
   1   1  -1  202.08   12.65 
  -1   1   1  214.64   12.51 
   1   1  -1  182.41   12.56 
  -1   1   1  197.13   12.56 
   1   1  -1  190.27   12.52 
   1   1  -1  199.27   12.51 
   0  -1   1   74.89    4.70 
   0  -1   1   72.60    4.71 
   0  -1  -1   80.48    4.71 
   0  -1  -1   69.09    4.67 
   0  -1  -1   81.11    4.72 
   0  -1  -1   77.08    4.67 
   0  -1   1   71.59    4.67 
   0  -1  -1   75.30    4.67 
   0  -1   1   80.30    4.73 
   0  -1  -1   69.14    5.20 
   0  -1  -1   69.56    4.69 
   0  -1  -1   83.21    4.67 
   0  -1   1   73.33    4.69 
   0  -1   1   65.90    4.67 
   0   1   1   67.86    4.52 
   0   1   1   79.52    5.06 
   0   1   1   80.12    4.56 
   0   1  -1   74.94    5.06 
   0   1   1   71.72    4.57 
   0   1  -1   79.55    4.52 
   0   1  -1   73.75    4.53 
   0   1  -1   75.62    4.54 
   0   1   1   65.45    4.52 
   0   1  -1   75.74    5.00 
   0   1  -1   70.13    4.52 
   0   1   1   66.31    4.52 
   0   1   1   68.99    4.53 
   0   1   1   65.62    4.51 
   1  -1   1  215.11   13.43 
   1  -1   1  206.71   12.70 
  -1  -1  -1  192.47   12.62 
  -1  -1  -1  205.16   12.68 
   1  -1   1  203.08   12.61 
   1  -1   1  178.88   12.60 
  -1  -1  -1  208.07   12.75 
  -1  -1  -1  200.06   14.07 
  -1  -1  -1  207.69   12.61 
  -1   1  -1  201.84   12.39 
   1   1   1  191.65   12.44 
  -1   1  -1  182.83   12.45 
  -1   1  -1  215.31   12.47 
  -1   1  -1  201.55   13.31 
   1   1   1  196.43   12.56 
   1   1   1  189.76   12.42 
   1   1   1  192.02   12.42 
   1   1   1  217.64   13.87 
   1   1   1  201.53   12.40 
  -2  -1  -1   52.49    3.53 
  -2  -1  -1   54.83    3.67 
   2  -1   1   55.05    3.46 
   2  -1   1   48.49    3.59 
   2  -1   1   56.61    3.40 
  -2  -1  -1   59.94    6.43 
  -2  -1  -1   54.73    3.41 
   2  -1   1   52.29    3.42 
   2  -1   1   58.77    5.29 
  -2  -1  -1   54.05    3.43 
  -2  -1  -1   52.71    3.43 
   2   1   1   54.42    3.37 
  -2   1  -1   52.25    3.36 
  -2   1  -1   58.73    3.33 
  -2   1  -1   55.17    5.44 
   2   1   1   56.68    3.42 
  -2   1  -1   51.99    3.49 
   2   1   1   49.29    5.64 
   2   1   1   46.02    3.39 
   2   1   1   51.20    3.31 
  -2   1  -1   49.60    3.44 
   2   1   1   54.48    3.65 
   3  -1   1   94.08    6.03 
  -3  -1  -1   87.13    6.42 
   3  -1   1   91.74    5.95 
  -3  -1  -1   91.19   13.04 
  -3  -1  -1   94.38    5.99 
  -3  -1  -1   91.30    6.00 
   3  -1   1   94.04    5.96 
   3  -1   1   98.01    6.09 
  -3  -1  -1  104.16    6.01 
  -3  -1  -1   95.68    6.03 
  -3  -1  -1   95.05    5.97 
   3  -1   1   96.36    6.00 
   3   1   1   92.23    6.48 
   3   1   1   95.30    5.93 
  -3   1  -1  100.38    5.84 
   3   1   1   95.66    5.98 
   3   1   1   90.82    5.88 
   3   1   1   95.04    5.84 
  -3   1  -1   92.04    5.86 
   3   1   1   94.18    5.83 
  -3   1  -1   89.61    6.03 
   3   1   1   85.06    5.97 
   3   1   1   89.26   11.31 
  -3   1  -1   88.30   10.94 
   4  -1   1   60.71    3.85 
  -4  -1  -1   61.59    3.83 
   4  -1   1   60.02    3.79 
  -4  -1  -1   61.00    3.88 
   4  -1   1   60.00    3.91 
  -4  -1  -1   54.82    3.84 
   4  -1   1   55.76    4.06 
  -4  -1  -1   58.49    3.78 
  -4  -1  -1   52.80    4.05 
   4  -1   1   60.19    4.02 
   4  -1   1   60.01    3.78 
  -4  -1  -1   66.51    3.97 
   4  -1   1   65.30    3.80 
   4   1   1   61.44    3.67 
   4   1   1   54.26    3.91 
  -4   1  -1   64.18    3.74 
  -4   1  -1   57.26    3.81 
   4   1   1   57.22    3.68 
   4   1   1   59.83    3.89 
  -4   1  -1   56.23    3.96 
  -4   1  -1   56.70    3.70 
  -4   1  -1   56.66    3.71 
  -4   1  -1   51.73    3.72 
   4   1   1   58.16    3.75 
  -4   1  -1   63.45    3.86 
   5  -1   1    9.05    0.57 
  -5  -1  -1    6.59    0.61 
   5  -1   1    8.58    0.66 
  -5  -1  -1    7.36    0.84 
   5  -1   1    7.17    0.75 
  -5  -1  -1    8.32    0.64 
  -5  -1  -1    8.46    0.62 
  -5  -1  -1    8.58    0.75 
   5  -1   1    8.15    0.57 
  -5   1  -1    8.22    0.67 
  -5   1  -1    7.74    0.57 
  -5   1  -1    7.28    0.82 
   5   1   1    7.33    0.55 
   5   1   1    6.57    0.68 
  -5   1  -1    8.33    0.74 
   5   1   1    8.45    0.56 
   5   1   1    8.29    0.55 
  -5   1  -1    7.08    0.58 
  -5   1  -1    8.40    0.62 
   5   1   1    7.55    0.69 
  -5   1  -1    8.13    0.60 
   6  -1   1    8.59    0.58 
  -6  -1  -1    8.78    0.62 
  -6  -1  -1    8.87    0.63 
   6  -1   1    7.98    0.58 
   6  -1   1    8.55    0.59 
  -6   1  -1    8.46    0.59 
   6   1   1    7.46    0.54 
  -6   1  -1    8.76    0.71 
   6   1   1    7.29    0.53 
   6  -2  -1    6.51    0.46 
  -6  -2   1    6.78    0.52 
  -6  -2   1    6.72    0.51 
   6  -2  -1    6.50    0.47 
   6   2  -1    5.87    0.41 
  -6   2   1    5.66    0.55 
  -6   2   1    6.16    0.45 
  -6   2   1    6.01    0.55 
  -5  -2   1    1.30    0.25 
  -5  -2   1    0.85    0.19 
   5  -2  -1    0.89    0.16 
  -5  -2   1    1.31    0.22 
   5  -2  -1    1.36    0.16 
  -5  -2   1    1.18    0.14 
  -5  -2   1    1.14    0.33 
   5  -2  -1    1.62    0.24 
   5   2  -1    1.03    0.13 
  -5   2   1    1.10    0.30 
  -5   2   1    1.08    0.21 
   5   2  -1    1.46    0.25 
  -5   2   1    1.11    0.33 
  -5   2   1    1.30    0.23 
  -5   2   1    1.24    0.17 
  -5   2   1    1.39    0.31 
   5   2  -1    0.95    0.22 
   4  -2  -1    0.54    0.10 
   4  -2  -1    0.26    0.19 
  -4  -2   1    0.27    0.14 
  -4  -2   1    0.30    0.21 
  -4  -2   1    0.46    0.22 
  -4  -2   1    0.13    0.18 
  -4  -2   1    0.27    0.09 
  -4  -2   1    0.19    0.11 
   4  -2  -1    0.24    0.08 
   4  -2  -1    0.29    0.09 
   4  -2  -1    0.27    0.17 
  -4  -2   1    0.23    0.11 
  -4  -2   1    0.27    0.11 
  -4  -2   1   -0.19    0.28 
   4   2  -1    0.24    0.07 
   4   2  -1    0.39    0.12 
   4   2  -1    0.23    0.15 
  -4   2   1    0.38    0.24 
  -4   2   1    0.29    0.09 
   4   2  -1    0.11    0.16 
   4   2  -1    0.39    0.15 
  -4   2   1    0.42    0.21 
  -4   2   1    0.41    0.15 
  -4   2   1    0.39    0.19 
  -4   2   1    0.37    0.15 
   4   2  -1    0.34    0.10 
   4   2  -1    0.29    0.07 
   3  -2  -1    7.64    0.52 
   3  -2  -1    8.12    0.55 
  -3  -2   1    8.01    0.62 
   3  -2  -1    7.63    0.59 
  -3  -2   1   10.81    1.47 
  -3  -2   1    7.67    0.54 
  -3  -2   1    7.85    0.57 
  -3  -2   1   13.01    7.60 
  -3  -2   1    7.88    0.62 
  -3  -2   1    7.70    0.57 
   3  -2  -1    7.60    0.71 
  -3  -2   1    7.70    0.53 
   3  -2  -1    6.53    5.25 
   3  -2  -1    7.81    0.53 
   3   2  -1    1.99    6.70 
   3   2  -1    7.50    0.53 
   3   2  -1    7.57    0.59 
  -3   2   1    7.56    0.51 
   3   2  -1    8.28    0.55 
  -3   2   1   11.48    4.58 
   3   2  -1   11.77    1.59 
   3   2  -1    7.56    0.56 
  -3   2   1    7.88    0.70 
   3   2  -1    8.50    0.67 
  -2  -2   1    7.82    0.59 
   2  -2  -1    8.20    0.51 
  -2  -2   1    7.61    0.64 
   2  -2  -1   12.93    2.04 
   2  -2  -1    7.88    0.53 
   2  -2  -1    7.89    0.53 
  -2  -2   1    8.50    0.90 
   2  -2  -1    6.85    0.61 
  -2  -2   1    7.10    0.54 
   2  -2  -1    7.08    0.51 
  -2  -2   1    9.27    3.21 
  -2  -2   1    8.04    0.59 
  -2   2   1    8.72    1.78 
  -2   2   1    8.35    0.65 
  -2   2   1    7.34    0.65 
   2   2  -1    7.73    0.55 
   2   2  -1   10.44    3.24 
   2   2  -1    8.22    0.57 
  -2   2   1    8.23    0.53 
   2   2  -1    8.38    0.60 
   2   2  -1    7.39    0.56 
   2   2  -1    8.91    0.93 
  -1  -2   1  524.50   31.09 
  -1  -2   1  488.73   32.56 
  -1  -2   1  469.76   30.92 
   1   2  -1  509.48   31.66 
   1   2  -1  439.02   29.79 
   1   2  -1  439.40   29.95 
   1   2  -1  523.98   29.77 
   0  -2   1  794.85   52.15 
   0  -2  -1  932.23   53.08 
   0  -2  -1  794.24   52.19 
   0  -2   1  846.59   52.23 
   0  -2  -1  813.63   52.33 
   0   2   1  931.79   60.76 
   0   2  -1  988.38   60.91 
   0   2   1  959.17   60.17 
   0   2  -1  969.73   60.73 
  -1  -2  -1   30.68    2.11 
   1  -2   1   37.59    2.16 
   1  -2   1   31.99    2.11 
  -1  -2  -1   31.84    2.29 
   1  -2   1   30.43    2.10 
  -1  -2  -1   30.02    3.73 
   1  -2   1   35.57    2.10 
  -1  -2  -1   34.65    2.21 
   1  -2   1   33.66    2.16 
   1  -2   1   34.39    2.16 
   1  -2   1   31.00    2.65 
  -1  -2  -1   31.57    2.14 
  -1  -2  -1   37.06    2.13 
   1   2   1   31.40    2.24 
  -1   2  -1   31.99    2.11 
  -1   2  -1   30.59    2.63 
   1   2   1   32.46    2.05 
   1   2   1   31.70    2.05 
  -1   2  -1   33.65    2.08 
   1   2   1   32.47    2.04 
   1   2   1   34.19    3.81 
  -1   2  -1   33.25    2.05 
  -2  -2  -1   37.63    2.44 
   2  -2   1   40.87    2.39 
   2  -2   1   36.37    2.40 
   2  -2   1   34.91    2.36 
   2  -2   1   39.46    2.56 
  -2  -2  -1   36.33    2.40 
  -2  -2  -1   37.53    2.45 
   2  -2   1   35.41    2.38 
   2  -2   1   36.63    3.93 
   2  -2   1   37.95    2.46 
  -2  -2  -1   45.42    6.55 
  -2  -2  -1   39.53    2.73 
  -2  -2  -1   38.31    2.39 
  -2  -2  -1   37.23    2.54 
   2   2   1   39.14    2.42 
   2   2   1   37.60    2.30 
   2   2   1   35.51    2.33 
   2   2   1   35.89    2.35 
   2   2   1   35.46    2.29 
  -2   2  -1   36.17    2.42 
  -2   2  -1   36.84    4.27 
  -2   2  -1   34.11    2.43 
   2   2   1   37.37    2.35 
   2   2   1   35.43    2.71 
  -3  -2  -1   73.40    4.68 
  -3  -2  -1   74.61    4.74 
  -3  -2  -1   73.39    4.66 
   3  -2   1   67.60    4.73 
  -3  -2  -1   74.72    4.65 
   3  -2   1   75.47    4.65 
  -3  -2  -1   72.56   13.23 
  -3  -2  -1   72.25    5.33 
   3  -2   1   78.94    4.68 
  -3  -2  -1   73.96    4.70 
  -3  -2  -1   71.80    4.65 
  -3  -2  -1   79.33    4.79 
   3  -2   1   76.03    4.64 
  -3  -2  -1   65.35    4.89 
   3  -2   1   75.55    4.78 
   3   2   1   69.29    4.44 
   3   2   1   68.39    4.45 
  -3   2  -1   70.45    4.47 
  -3   2  -1   70.31    4.59 
   3   2   1   70.38    5.36 
   3   2   1   71.41    4.50 
   3   2   1   75.59    4.63 
  -3   2  -1   76.59    4.59 
   3   2   1   75.33   11.21 
  -3   2  -1   73.65    4.67 
  -3   2  -1   70.40   10.22 
   3   2   1   60.90    4.55 
  -4  -2  -1   47.22    3.19 
   4  -2   1   44.92    3.41 
  -4  -2  -1   53.08    3.13 
   4  -2   1   52.27    3.19 
   4  -2   1   48.84    3.11 
  -4  -2  -1   50.26    3.17 
  -4  -2  -1   47.85    3.23 
   4  -2   1   46.64    3.29 
   4  -2   1   54.39    3.46 
   4  -2   1   46.66    3.12 
   4   2   1   47.21    3.09 
  -4   2  -1   52.80    3.04 
  -4   2  -1   46.23    3.26 
   4   2   1   46.42    3.05 
   4   2   1   43.79    3.05 
   4   2   1   50.34    3.32 
  -4   2  -1   48.55    3.03 
   4   2   1   41.09    2.97 
  -4   2  -1   45.43    3.04 
  -4   2  -1   49.46    3.14 
  -4   2  -1   45.47    2.99 
   4   2   1   46.02    2.97 
  -5  -2  -1   10.24    0.98 
   5  -2   1   11.34    0.77 
  -5  -2  -1   12.32    1.00 
  -5  -2  -1   12.07    0.82 
  -5  -2  -1    9.91    1.18 
  -5   2  -1    7.17    0.61 
   5   2   1    5.90    0.65 
  -5   2  -1    7.25    0.73 
   6  -2   1    4.83    0.35 
   6  -2   1    4.55    0.35 
  -6  -2  -1    5.03    0.38 
  -6  -2  -1    5.22    0.40 
   6   2   1    3.94    0.29 
  -6   2  -1    4.49    0.38 
  -6   2  -1    4.04    0.43 
  -6   2  -1    3.63    0.32 
  -6   2  -1    3.46    0.32 
   6  -3  -1    3.35    0.27 
   6  -3  -1    4.09    0.29 
   6  -3  -1    3.89    0.28 
  -6  -3   1    3.85    0.31 
  -6   3   1    4.01    0.36 
  -6   3   1    4.24    0.42 
  -6   3   1    3.70    0.31 
   6   3  -1    3.91    0.35 
  -6   3   1    3.90    0.41 
  -5  -3   1    3.40    0.33 
   5  -3  -1    3.05    0.26 
  -5  -3   1    2.73    0.53 
   5  -3  -1    3.34    0.32 
  -5  -3   1    3.51    0.27 
  -5  -3   1    3.08    0.36 
   5  -3  -1    3.82    0.30 
  -5  -3   1    2.21    0.38 
   5   3  -1    3.04    0.25 
  -5   3   1    3.95    0.48 
  -5   3   1    3.28    0.35 
  -5   3   1    3.16    0.50 
  -5   3   1    2.95    0.35 
   5   3  -1    2.79    0.34 
  -5   3   1    3.74    0.55 
   5   3  -1    3.07    0.35 
  -4  -3   1    1.68    0.27 
  -4  -3   1    1.81    0.20 
  -4  -3   1    1.50    0.18 
   4  -3  -1    2.41    0.45 
  -4  -3   1    1.98    0.36 
  -4  -3   1    1.16    0.22 
   4  -3  -1    1.73    0.17 
  -4  -3   1    1.85    0.19 
   4  -3  -1    1.77    0.20 
  -4  -3   1    1.68    0.26 
  -4  -3   1    1.80    0.30 
  -4   3   1    2.18    0.38 
  -4   3   1    2.05    0.33 
  -4   3   1    1.68    0.25 
  -4   3   1    2.27    0.28 
  -4   3   1    1.34    0.29 
  -4   3   1    1.86    0.18 
  -4   3   1    2.00    0.24 
   4   3  -1    1.67    0.25 
  -4   3   1    2.02    0.35 
   3  -3  -1   24.25    1.82 
  -3  -3   1   25.72    1.70 
   3  -3  -1   25.10    1.68 
  -3  -3   1   24.89    1.67 
  -3  -3   1   28.11    1.80 
   3  -3  -1   23.48    1.60 
  -3  -3   1   24.18    1.62 
  -3  -3   1   27.39    1.73 
  -3  -3   1   25.66    1.75 
   3  -3  -1   24.33    1.67 
  -3   3   1   23.84    1.54 
  -3   3   1   23.96    1.83 
  -3   3   1   24.71    1.74 
   3   3  -1   23.91    1.60 
   3   3  -1   24.86    1.63 
   3   3  -1   26.61    1.63 
   3   3  -1   24.51    1.54 
  -3   3   1   23.35    1.60 
  -3   3   1   22.46    1.74 
   3   3  -1   21.85    1.60 
  -2  -3   1   46.64    3.31 
   2  -3  -1   44.87    2.88 
  -2  -3   1   49.08    2.96 
  -2  -3   1   61.14    8.27 
   2  -3  -1   43.26    2.83 
  -2  -3   1   44.70    2.85 
  -2  -3   1   40.88    2.97 
  -2  -3   1   42.31    2.90 
  -2  -3   1   43.22    2.84 
  -2  -3   1   45.74    2.87 
   2  -3  -1   44.42    2.83 
   2  -3  -1   48.89    2.99 
   2   3  -1   41.71    3.31 
   2   3  -1   47.34    2.92 
   2   3  -1   42.61    7.05 
  -2   3   1   47.98    3.03 
   2   3  -1   46.86    2.91 
  -2   3   1   49.35    2.90 
   2   3  -1   39.33    2.89 
  -1  -3   1   21.97    1.42 
   1  -3  -1   21.73    1.47 
  -1  -3   1   26.41    3.94 
  -1  -3   1   22.03    1.46 
  -1  -3   1   22.52    1.66 
  -1  -3   1   21.31    1.44 
  -1  -3   1   21.68    1.40 
  -1  -3   1   24.82    1.50 
  -1  -3   1   20.25    1.47 
  -1   3   1   21.23    1.43 
   1   3  -1   20.86    1.42 
   1   3  -1   22.55    1.43 
  -1   3   1   24.28    1.51 
   1   3  -1   23.05    1.65 
   1   3  -1   13.35    3.18 
   0  -3  -1   71.43    4.93 
   0  -3   1   76.23    4.93 
   0  -3  -1   87.39    5.03 
   0  -3   1   70.04    4.95 
   0  -3  -1   88.79    4.93 
   0  -3   1   71.30    4.93 
   0  -3  -1   82.94    6.12 
   0  -3   1   90.09    5.01 
   0  -3   1   70.55    4.99 
   0  -3   1   82.53    5.03 
   0  -3  -1   77.19    4.95 
   0   3  -1   79.42    5.12 
   0   3   1   80.48    5.13 
   0   3   1   82.57    6.03 
   0   3   1   73.70    5.20 
   0   3  -1   84.62    5.94 
   0   3   1   87.58    5.20 
   0   3  -1   81.25    6.07 
   0   3  -1   83.06    5.17 
  -1  -3  -1  217.71   13.02 
  -1  -3  -1  194.55   12.87 
  -1  -3  -1  213.76   15.41 
  -1  -3  -1  200.94   13.10 
   1  -3   1  211.96   12.92 
  -1  -3  -1  218.87   12.90 
  -1  -3  -1  186.52   12.91 
   1  -3   1  205.68   12.86 
   1   3   1  196.88   12.35 
  -1   3  -1  209.20   12.43 
   1   3   1  190.12   14.44 
   1   3   1  198.23   12.36 
  -1   3  -1  196.59   12.36 
   1   3   1  188.68   12.59 
  -2  -3  -1   40.41    2.49 
   2  -3   1   39.93    2.55 
  -2  -3  -1   39.64    2.45 
  -2  -3  -1   38.13    2.46 
  -2  -3  -1   36.43    2.52 
  -2  -3  -1   29.31    3.48 
  -2  -3  -1   37.79    2.65 
   2  -3   1   41.30    2.45 
   2  -3   1   37.62    2.45 
  -2  -3  -1   44.95    9.05 
  -2  -3  -1   39.79    2.57 
   2   3   1   37.59    2.37 
   2   3   1   38.61    6.91 
  -2   3  -1   38.99    2.50 
   2   3   1   31.97    2.37 
   2   3   1   39.66    2.92 
  -2   3  -1   38.58    2.36 
   2   3   1   37.45    2.40 
  -3  -3  -1    9.80    0.71 
   3  -3   1   10.09    0.89 
   3  -3   1    9.26    0.64 
   3  -3   1   10.14    0.65 
  -3  -3  -1    8.71    0.91 
  -3  -3  -1    9.94    0.68 
  -3  -3  -1   10.19    0.68 
   3  -3   1   10.78    0.69 
  -3  -3  -1    9.82    0.72 
   3  -3   1    9.68    0.79 
  -3  -3  -1    9.66    0.79 
  -3  -3  -1    9.40    0.77 
  -3  -3  -1    9.70    0.66 
   3   3   1    9.06    0.70 
   3   3   1    8.87    0.83 
  -3   3  -1    8.89    0.62 
  -3   3  -1    8.97    0.67 
  -3   3  -1    9.75    0.83 
  -3   3  -1    9.87    0.78 
  -3   3  -1    9.83    0.77 
   3   3   1   10.24    0.74 
  -3   3  -1    9.27    0.70 
   3   3   1    8.58    0.69 
   3   3   1   10.09    0.63 
   4  -3   1   33.11    2.25 
  -4  -3  -1   36.35    2.28 
   4  -3   1   37.43    2.79 
  -4  -3  -1   40.00    2.40 
  -4  -3  -1   30.94    2.33 
  -4   3  -1   31.89    2.24 
   4   3   1   34.40    2.06 
  -4   3  -1   34.01    2.24 
  -4   3  -1   31.48    2.05 
  -4   3  -1   33.31    2.12 
  -4   3  -1   29.57    2.12 
   4   3   1   30.80    2.14 
  -4   3  -1   32.04    2.46 
  -5  -3  -1   11.15    0.84 
   5  -3   1   10.39    0.76 
  -5  -3  -1   11.83    0.82 
  -5  -3  -1   11.04    0.76 
   5  -3   1   11.79    0.77 
   5  -3   1   12.45    0.76 
  -5   3  -1   11.09    0.76 
  -5   3  -1    9.89    0.88 
  -5   3  -1   10.58    0.85 
  -5   3  -1   10.65    0.77 
   5   3   1   10.98    0.79 
  -5   3  -1    9.59    0.77 
   5   3   1   10.74    0.70 
  -6  -3  -1    1.86    0.18 
  -6  -3  -1    1.67    0.20 
   6  -3   1    1.92    0.16 
   6  -3   1    1.37    0.14 
   6  -3   1    1.37    0.14 
  -6   3  -1    1.45    0.19 
  -6   3  -1    1.01    0.18 
  -6   3  -1    1.41    0.23 
  -6  -4   1    6.05    0.46 
  -6  -4   1    6.39    0.46 
   6  -4  -1    6.27    0.42 
  -6   4   1    5.23    0.42 
   6   4  -1    4.29    0.40 
   5  -4  -1    9.65    0.66 
  -5  -4   1   10.27    0.76 
   5  -4  -1   10.03    0.65 
  -5  -4   1    8.96    0.73 
  -5  -4   1    9.37    0.66 
  -5   4   1    8.53    0.73 
  -5   4   1    8.47    0.64 
   5   4  -1    8.60    0.65 
  -5   4   1    7.28    0.61 
  -5   4   1    8.45    0.72 
  -4  -4   1   11.71    0.93 
  -4  -4   1   10.50    0.93 
   4  -4  -1   11.73    0.80 
  -4  -4   1   12.61    0.81 
  -4  -4   1   11.61    0.85 
  -4  -4   1   11.83    0.79 
  -4  -4   1   14.24    1.29 
   4  -4  -1   10.73    0.79 
  -4  -4   1   11.57    0.90 
  -4  -4   1   10.94    0.79 
  -4   4   1   10.61    0.82 
   4   4  -1   10.90    0.83 
  -4   4   1   12.20    0.94 
  -4   4   1   10.31    0.99 
  -4   4   1   11.05    0.81 
   4   4  -1   10.38    0.80 
   4   4  -1   10.21    0.72 
  -4   4   1   11.76    0.93 
  -4   4   1   12.01    0.80 
  -3  -4   1   16.15    1.05 
  -3  -4   1   15.34    1.08 
  -3  -4   1   15.79    1.05 
  -3  -4   1   15.78    1.20 
   3  -4  -1   14.36    1.00 
   3  -4  -1   17.29    1.34 
   3  -4  -1   15.35    1.02 
  -3  -4   1   13.91    1.13 
  -3  -4   1   16.49    1.04 
  -3   4   1   14.79    1.08 
   3   4  -1   15.10    1.02 
  -3   4   1   15.60    1.04 
  -3   4   1   16.15    1.21 
  -3   4   1   14.03    1.03 
   3   4  -1   14.69    1.05 
  -3   4   1   13.65    1.05 
  -3   4   1   14.86    1.14 
  -3   4   1   14.67    0.99 
  -3   4   1   15.59    1.14 
   3   4  -1   14.94    1.08 
  -2  -4   1   23.10    1.54 
   2  -4  -1   24.58    1.43 
  -2  -4   1   20.68    1.62 
   2  -4  -1   20.96    1.58 
  -2  -4   1   21.13    1.58 
  -2  -4   1   22.68    2.25 
  -2  -4   1   24.02    1.50 
  -2  -4   1   24.16    1.46 
   2  -4  -1   19.32    1.50 
   2  -4  -1   22.86    1.51 
  -2  -4   1   24.31    1.47 
   2   4  -1   25.51    1.53 
  -2   4   1   22.73    1.55 
  -2   4   1   23.42    1.66 
  -2   4   1   27.27    1.67 
  -2   4   1   21.46    1.58 
   2   4  -1   22.29    1.59 
  -2   4   1   26.62    1.78 
   2   4  -1   20.65    1.56 
  -2   4   1   24.13    1.69 
  -1  -4   1   33.07    5.41 
  -1  -4   1   37.04    2.25 
  -1  -4   1   35.33    2.35 
  -1  -4   1   38.54    2.27 
  -1  -4   1   39.10    2.28 
  -1  -4   1   30.25    2.56 
   1  -4  -1   32.44    2.31 
  -1  -4   1   36.05    2.38 
  -1  -4   1   34.37    2.31 
   1   4  -1   38.58    2.43 
   1   4  -1   34.62    5.32 
  -1   4   1   43.80    2.55 
   1   4  -1   34.35    2.68 
  -1   4   1   34.18    2.42 
   0  -4   1   18.42    1.33 
   0  -4   1   22.79    1.31 
   0  -4  -1   19.43    1.32 
   0  -4   1   18.57    1.31 
   0  -4  -1   21.45    2.92 
   0  -4   1   20.87    1.29 
   0  -4  -1   20.66    1.29 
   0  -4  -1   20.04    1.34 
   0  -4  -1   23.01    1.41 
   0   4   1   23.61    1.59 
   0   4   1   22.65    1.50 
   0   4   1   21.24    2.76 
   0   4  -1   22.90    1.49 
   0   4  -1   23.56    2.50 
  -1  -4  -1  129.36    7.84 
   1  -4   1  125.23    7.80 
  -1  -4  -1  119.29    7.81 
  -1  -4  -1  108.67    7.83 
   1  -4   1  128.71    7.80 
   1  -4   1  106.38    7.88 
  -1  -4  -1  126.06    8.11 
   1  -4   1  144.22    7.89 
  -1  -4  -1  134.44    8.05 
  -1   4  -1  131.69    7.94 
  -1   4  -1  121.14    7.85 
   1   4   1  136.21   13.29 
   1   4   1  122.04    8.43 
   1   4   1  121.17    7.85 
  -2  -4  -1    2.14    0.29 
  -2  -4  -1    2.52    0.34 
   2  -4   1    2.65    0.19 
  -2  -4  -1    2.37    0.21 
  -2  -4  -1    2.16    0.40 
  -2  -4  -1    2.56    0.27 
   2  -4   1    2.59    0.32 
   2  -4   1    2.44    0.18 
  -2  -4  -1    2.02    0.24 
  -2   4  -1    2.20    0.21 
  -2   4  -1    2.91    0.37 
  -2   4  -1    2.51    0.32 
   2   4   1    2.54    0.22 
   2   4   1    2.42    0.21 
  -2   4  -1    2.00    0.24 
  -2   4  -1    2.43    0.26 
  -2   4  -1    2.11    0.28 
   2   4   1    2.05    0.27 
   3  -4   1   18.51    1.14 
  -3  -4  -1   17.28    1.20 
  -3  -4  -1   16.10    1.25 
   3  -4   1   15.31    1.37 
  -3  -4  -1   17.42    1.18 
   3  -4   1   16.77    1.27 
  -3  -4  -1   17.71    1.14 
  -3  -4  -1   18.71    1.15 
  -3  -4  -1   15.16    1.42 
  -3  -4  -1   16.30    1.30 
  -3  -4  -1   17.83    1.13 
  -3   4  -1   15.45    1.12 
   3   4   1   16.43    1.16 
   3   4   1   16.34    1.14 
  -3   4  -1   15.27    1.16 
  -3   4  -1   16.46    1.14 
  -3   4  -1   17.54    1.26 
  -3   4  -1   17.99    1.27 
   3   4   1   17.98    1.22 
  -3   4  -1   18.69    1.19 
   3   4   1   14.51    1.12 
  -3   4  -1   18.45    1.32 
   4  -4   1    7.29    0.54 
   4  -4   1    7.63    0.50 
  -4  -4  -1    6.42    0.69 
  -4  -4  -1    6.42    0.51 
  -4  -4  -1    6.84    0.58 
  -4  -4  -1    7.31    0.58 
  -4  -4  -1    7.00    0.52 
  -4  -4  -1    6.92    0.66 
   4  -4   1    7.42    0.49 
  -4  -4  -1    7.74    0.54 
  -4   4  -1    7.25    0.57 
   4   4   1    6.09    0.54 
  -4   4  -1    5.93    0.70 
  -4   4  -1    7.99    0.68 
   4   4   1    6.59    0.57 
  -4   4  -1    6.33    0.55 
  -4   4  -1    7.25    0.66 
  -4   4  -1    6.81    0.53 
  -5  -4  -1    3.64    0.28 
   5  -4   1    3.52    0.30 
  -5  -4  -1    3.63    0.36 
   5  -4   1    3.40    0.27 
  -5   4  -1    3.32    0.33 
  -5   4  -1    3.95    0.35 
  -5   4  -1    3.56    0.34 
  -5   4  -1    4.12    0.43 
   5   4   1    3.68    0.36 
   6  -4   1    6.51    0.47 
  -6  -4  -1    7.90    0.54 
   6   4   1    6.31    0.46 
  -6   4  -1    6.75    0.49 
  -6   4  -1    6.66    0.53 
  -6   4  -1    6.34    0.45 
  -6   5   1    2.53    0.25 
   5  -5  -1    2.55    0.22 
   5  -5  -1    3.58    0.26 
  -5  -5   1    3.04    0.30 
  -5  -5   1    3.24    0.26 
   5   5  -1    2.87    0.30 
  -5   5   1    2.79    0.28 
  -5   5   1    3.20    0.38 
   5   5  -1    2.41    0.28 
  -5   5   1    3.24    0.30 
  -5   5   1    3.35    0.38 
   4  -5  -1    8.98    0.58 
  -4  -5   1    9.36    0.68 
   4  -5  -1    7.66    0.58 
  -4  -5   1    8.79    0.62 
  -4  -5   1    7.97    0.80 
  -4  -5   1    8.65    0.61 
   4  -5  -1    9.11    0.59 
  -4  -5   1    7.27    0.74 
   4   5  -1    9.92    0.84 
  -4   5   1   10.25    0.74 
  -4   5   1    9.54    0.89 
  -4   5   1    7.68    0.65 
  -3  -5   1    7.06    0.71 
  -3  -5   1    8.94    0.61 
  -3  -5   1    8.77    0.59 
   3  -5  -1    7.61    0.54 
  -3  -5   1    9.95    1.00 
  -3  -5   1   10.84    0.87 
   3  -5  -1    6.99    0.84 
   3   5  -1    7.42    0.64 
  -3   5   1    7.96    0.66 
  -3   5   1    8.54    0.72 
   3   5  -1    8.28    0.67 
  -3   5   1    8.07    0.60 
  -3   5   1    7.84    0.63 
  -3   5   1    7.91    0.71 
  -3   5   1    7.68    0.58 
   3   5  -1    7.75    0.61 
  -3   5   1    7.40    0.91 
   3   5  -1    6.99    0.58 
  -3   5   1    7.77    0.61 
  -2  -5   1   18.58    1.18 
  -2  -5   1   17.76    1.20 
   2  -5  -1   14.55    1.27 
   2  -5  -1   17.95    1.31 
  -2  -5   1   16.90    1.17 
   2  -5  -1   19.10    1.35 
  -2  -5   1   18.14    1.16 
  -2  -5   1   17.66    1.35 
  -2  -5   1   18.61    1.38 
   2   5  -1   16.34    1.16 
  -2   5   1   14.82    1.12 
  -2   5   1   17.84    1.16 
  -2   5   1   18.74    1.31 
  -2   5   1   15.74    1.16 
  -2   5   1   17.50    1.14 
  -2   5   1   16.93    1.26 
   2   5  -1   15.23    1.13 
  -2   5   1   17.82    1.24 
   2   5  -1   16.31    1.19 
  -2   5   1   16.92    1.16 
  -2   5   1   18.23    1.16 
  -2   5   1   17.89    1.22 
   2   5  -1   15.64    1.14 
   1  -5  -1   18.53    1.29 
  -1  -5   1   17.74    1.13 
  -1  -5   1   16.75    1.11 
  -1  -5   1   17.89    1.15 
  -1  -5   1   17.76    1.28 
   1  -5  -1   16.71    1.10 
   1  -5  -1   15.19    1.23 
  -1   5   1   15.47    1.11 
  -1   5   1   17.10    1.22 
   1   5  -1   16.30    1.13 
   1   5  -1   15.59    1.11 
   1   5  -1   15.96    1.14 
   1   5  -1   17.27    1.12 
  -1   5   1   16.38    1.11 
  -1   5   1   17.40    1.18 
  -1   5   1   16.54    1.14 
  -1   5   1   16.92    1.16 
   0  -5  -1    3.13    0.24 
   0  -5  -1    3.83    0.33 
   0  -5   1    3.29    0.37 
   0  -5   1    3.41    0.27 
   0  -5   1    3.29    0.23 
   0  -5  -1    3.38    0.41 
   0  -5  -1    3.42    0.40 
   0   5  -1    3.18    0.28 
   0   5  -1    3.01    0.35 
   0   5  -1    2.92    0.31 
   0   5   1    3.28    0.33 
   0   5   1    3.56    0.31 
   0   5   1    2.76    0.32 
   0   5   1    3.16    0.31 
   0   5   1    3.12    0.31 
   0   5   1    2.78    0.27 
   0   5  -1    3.44    0.34 
   0   5  -1    3.04    0.33 
  -1  -5  -1   29.00    1.92 
  -1  -5  -1   28.87    1.95 
   1  -5   1   30.22    1.91 
   1  -5   1   31.13    2.04 
   1  -5   1   30.76    2.07 
  -1  -5  -1   31.93    2.12 
  -1  -5  -1   30.73    1.93 
  -1  -5  -1   30.23    2.13 
   1  -5   1   31.33    2.13 
  -1  -5  -1   27.03    2.01 
  -1   5  -1   25.76    1.84 
  -1   5  -1   24.72    1.82 
   1   5   1   26.44    1.80 
   1   5   1   26.17    1.83 
  -1   5  -1   30.20    1.93 
   1   5   1   31.83    1.90 
  -1   5  -1   30.43    1.86 
  -1   5  -1   27.77    1.83 
   1   5   1   28.24    1.83 
   1   5   1   28.21    1.87 
  -1   5  -1   27.17    1.83 
  -1   5  -1   29.95    1.83 
   1   5   1   26.53    1.85 
  -2  -5  -1   41.68    2.82 
   2  -5   1   42.64    2.92 
   2  -5   1   39.01    2.96 
  -2  -5  -1   39.94    2.88 
  -2  -5  -1   46.46    2.77 
  -2  -5  -1   40.62    2.96 
  -2  -5  -1   47.69    2.79 
  -2  -5  -1   45.57    2.79 
  -2  -5  -1   47.17    3.21 
   2   5   1   41.00    2.73 
   2   5   1   42.55    2.73 
  -2   5  -1   47.06    2.86 
  -2   5  -1   40.03    2.78 
  -2   5  -1   43.54    2.87 
  -2   5  -1   40.19    2.75 
  -2   5  -1   39.48    2.73 
  -2   5  -1   41.00    2.83 
  -2   5  -1   41.33    2.75 
   2   5   1   39.82    2.75 
   2   5   1   43.70    2.73 
   2   5   1   46.76    2.81 
  -2   5  -1   41.00    2.73 
  -2   5  -1   45.87    2.77 
  -3  -5  -1   27.15    1.80 
  -3  -5  -1   27.78    1.74 
  -3  -5  -1   26.72    1.78 
  -3  -5  -1   25.19    1.87 
   3  -5   1   25.86    1.71 
   3  -5   1   25.22    1.68 
  -3  -5  -1   25.26    1.94 
  -3  -5  -1   27.08    1.73 
  -3  -5  -1   28.29    1.74 
  -3   5  -1   27.70    1.81 
  -3   5  -1   22.37    1.66 
  -3   5  -1   27.30    1.88 
   3   5   1   27.06    1.75 
   3   5   1   23.52    1.65 
   3   5   1   24.18    1.68 
  -3   5  -1   27.56    1.71 
  -3   5  -1   21.89    1.64 
  -3   5  -1   23.94    1.69 
  -3   5  -1   26.40    1.79 
  -4  -5  -1    8.24    0.63 
   4  -5   1    9.41    0.64 
  -4  -5  -1    9.22    0.68 
  -4  -5  -1    8.42    0.62 
  -4  -5  -1    9.38    0.62 
   4  -5   1    8.58    0.58 
  -4   5  -1    8.23    0.64 
  -4   5  -1    9.82    0.76 
  -4   5  -1    8.22    0.64 
   4   5   1    8.44    0.64 
  -4   5  -1    8.56    0.73 
   4   5   1    6.85    0.63 
  -4   5  -1    8.20    0.61 
   5  -5   1   18.52    1.29 
   5  -5   1   21.30    1.30 
  -5  -5  -1   20.54    1.34 
  -5  -5  -1   20.34    1.31 
  -5   5  -1   15.84    0.99 
  -5   5  -1   13.58    0.98 
  -5   5  -1   14.15    1.06 
  -5  -6   1    0.68    0.10 
  -5  -6   1    0.74    0.13 
   5   6  -1    0.33    0.08 
  -5   6   1    0.42    0.09 
  -5   6   1    0.57    0.16 
  -5   6   1    0.60    0.16 
  -4  -6   1    5.97    0.52 
  -4  -6   1    6.89    0.55 
  -4  -6   1    7.43    0.51 
  -4  -6   1    6.87    0.50 
   4   6  -1    6.56    0.50 
   4   6  -1    6.50    0.54 
  -4   6   1    6.85    0.52 
  -4   6   1    5.85    0.49 
  -4   6   1    6.18    0.58 
  -3  -6   1   14.10    0.95 
  -3  -6   1   12.73    0.99 
  -3  -6   1   13.37    0.93 
  -3  -6   1   13.39    0.95 
  -3  -6   1   15.13    1.09 
  -3  -6   1   15.78    1.35 
  -3   6   1   12.21    0.99 
  -3   6   1   12.58    0.90 
  -3   6   1   12.94    0.90 
   3   6  -1   11.36    0.92 
  -3   6   1   10.59    0.91 
  -3   6   1   13.41    1.00 
   3   6  -1   12.10    0.87 
  -3   6   1   11.24    1.00 
  -3   6   1   14.12    1.14 
  -2  -6   1    2.56    0.23 
  -2  -6   1    2.12    0.42 
  -2  -6   1    2.08    0.23 
  -2  -6   1    2.69    0.25 
  -2  -6   1    2.41    0.26 
  -2   6   1    2.42    0.28 
  -2   6   1    2.23    0.40 
  -2   6   1    2.96    0.30 
   2   6  -1    2.37    0.28 
  -2   6   1    2.43    0.33 
  -2   6   1    2.34    0.28 
  -2   6   1    2.36    0.27 
  -2   6   1    2.52    0.34 
  -2   6   1    2.19    0.25 
  -2   6   1    2.37    0.35 
   2   6  -1    2.57    0.33 
  -2   6   1    2.36    0.27 
   2   6  -1    2.30    0.25 
   2   6  -1    2.41    0.28 
  -1  -6   1   12.14    0.80 
   1  -6  -1   11.97    0.78 
  -1  -6   1   12.05    0.83 
   1  -6  -1   10.87    0.96 
  -1  -6   1   11.77    1.00 
  -1  -6   1   12.45    0.81 
   1   6  -1   11.16    0.84 
  -1   6   1   12.12    0.85 
  -1   6   1   12.35    0.91 
  -1   6   1   11.27    0.91 
   1   6  -1   12.97    0.90 
   1   6  -1   10.24    0.81 
  -1   6   1   10.24    0.80 
  -1   6   1   11.05    0.83 
  -1   6   1   11.43    0.82 
   1   6  -1   11.52    0.85 
  -1   6   1    9.56    0.86 
  -1   6   1   13.45    0.91 
   0  -6   1    6.81    0.50 
   0  -6  -1    7.03    0.48 
   0  -6  -1    6.70    0.49 
   0  -6  -1    6.75    0.67 
   0  -6  -1    7.35    0.51 
   0  -6   1    7.15    0.48 
   0  -6   1    8.21    0.71 
   0   6  -1    6.52    0.68 
   0   6  -1    7.13    0.55 
   0   6  -1    7.28    0.55 
   0   6   1    7.00    0.55 
   0   6   1    7.20    0.62 
   0   6   1    6.42    0.60 
   0   6   1    7.99    0.76 
   0   6  -1    6.36    0.65 
   0   6  -1    7.12    0.70 
   0   6   1    7.77    0.58 
  -1  -6  -1    6.72    0.50 
   1  -6   1    5.25    0.63 
  -1  -6  -1    6.56    0.67 
  -1  -6  -1    6.88    0.48 
  -1  -6  -1    6.58    0.46 
   1   6   1    6.64    0.56 
  -1   6  -1    6.55    0.57 
   1   6   1    6.35    0.52 
  -1   6  -1    6.27    0.48 
  -1   6  -1    6.84    0.53 
  -1   6  -1    6.17    0.52 
   1   6   1    6.99    0.55 
  -1   6  -1    5.08    0.47 
   1   6   1    6.63    0.51 
   1   6   1    6.57    0.50 
  -1   6  -1    5.60    0.48 
  -1   6  -1    6.63    0.50 
   1   6   1    5.16    0.49 
  -1   6  -1    5.15    0.71 
  -1   6  -1    5.86    0.54 
  -2  -6  -1   82.73    5.38 
  -2  -6  -1   88.97    5.34 
  -2  -6  -1   81.93    5.33 
  -2  -6  -1   86.69    5.32 
  -2  -6  -1   80.59    5.36 
  -2   6  -1   74.96    4.85 
   2   6   1   72.91    4.85 
  -2   6  -1   87.98    5.00 
  -2   6  -1   69.34    4.93 
  -2   6  -1   73.57    4.84 
   2   6   1   74.96    4.83 
  -2   6  -1   81.51    4.88 
  -2   6  -1   69.37    4.85 
   2   6   1   81.13    4.93 
   2   6   1   78.08    4.88 
   2   6   1   77.58    4.92 
  -2   6  -1   81.50    4.89 
  -2   6  -1   66.63    4.97 
  -3  -6  -1   26.66    1.85 
  -3  -6  -1   27.62    1.82 
  -3  -6  -1   25.03    1.88 
  -3  -6  -1   32.15    1.87 
  -3   6  -1   29.30    1.89 
  -3   6  -1   25.69    1.72 
   3   6   1   24.33    1.81 
   3   6   1   29.14    1.79 
  -3   6  -1   22.15    1.77 
  -3   6  -1   23.75    1.67 
  -3   6  -1   28.55    2.03 
   3   6   1   25.54    1.75 
  -3   6  -1   23.00    1.68 
  -3   6  -1   29.26    1.78 
   3   6   1   22.27    1.68 
  -4  -6  -1    7.76    0.58 
  -4  -6  -1    7.96    0.59 
  -4  -6  -1    9.10    0.59 
  -4  -6  -1    9.13    0.63 
   4   6   1    8.79    0.60 
  -4   6  -1    8.56    0.62 
   4   6   1    6.89    0.61 
  -4   6  -1    8.27    0.62 
  -5  -6  -1    9.56    0.64 
  -5  -6  -1   10.05    0.67 
  -5   6  -1   10.46    0.74 
  -5   6  -1   11.56    0.79 
   5   6   1   10.45    0.72 
  -4  -7   1    5.79    0.47 
  -4  -7   1    7.41    0.54 
  -4  -7   1    7.62    0.50 
  -4   7   1    5.48    0.47 
   4   7  -1    4.67    0.42 
  -4   7   1    5.48    0.46 
   4   7  -1    6.05    0.39 
  -4   7   1    4.90    0.40 
  -3  -7   1    1.70    0.19 
  -3  -7   1    1.81    0.20 
  -3  -7   1    1.53    0.20 
  -3  -7   1    2.01    0.29 
  -3   7   1    1.26    0.26 
  -3   7   1    1.34    0.20 
   3   7  -1    1.59    0.25 
   3   7  -1    1.55    0.23 
   3   7  -1    1.76    0.19 
  -3   7   1    1.61    0.20 
  -3   7   1    1.88    0.22 
   3   7  -1    1.07    0.23 
  -3   7   1    1.82    0.27 
  -3   7   1    1.62    0.27 
  -2  -7   1    0.65    0.12 
  -2  -7   1    0.96    0.15 
  -2  -7   1    0.85    0.21 
  -2  -7   1    0.82    0.15 
  -2   7   1    0.83    0.18 
   2   7  -1    0.85    0.19 
  -2   7   1    0.62    0.15 
  -2   7   1    0.74    0.16 
   2   7  -1    0.95    0.24 
   2   7  -1    0.75    0.17 
  -2   7   1    0.54    0.13 
  -2   7   1    0.75    0.22 
  -2   7   1    0.48    0.17 
   2   7  -1    0.60    0.11 
   2   7  -1    0.93    0.23 
   2   7  -1    0.83    0.18 
  -2   7   1    0.78    0.18 
  -1  -7   1    0.37    0.09 
   1  -7  -1    0.34    0.07 
  -1  -7   1    0.08    0.09 
  -1  -7   1    0.37    0.09 
  -1   7   1    0.26    0.14 
  -1   7   1    0.35    0.20 
   1   7  -1    0.42    0.16 
  -1   7   1    0.13    0.15 
  -1   7   1    0.35    0.13 
   1   7  -1    0.31    0.17 
   1   7  -1    0.32    0.18 
  -1   7   1    0.27    0.13 
   1   7  -1    0.16    0.12 
  -1   7   1    0.31    0.14 
   1   7  -1    0.24    0.11 
  -1   7   1    0.25    0.11 
   0  -7   1    6.32    0.45 
   0  -7  -1    6.15    0.47 
   0  -7  -1    6.77    0.46 
   0  -7   1    6.11    0.46 
   0   7  -1    5.69    0.48 
   0   7   1    6.03    0.50 
   0   7  -1    6.44    0.57 
   0   7   1    6.52    0.58 
   0   7   1    6.56    0.52 
   0   7  -1    5.73    0.49 
   0   7  -1    6.43    0.54 
   0   7   1    6.28    0.53 
   0   7   1    6.25    0.53 
   0   7  -1    6.36    0.53 
   0   7   1    5.37    0.49 
  -1  -7  -1   21.01    1.42 
  -1  -7  -1   21.81    1.37 
  -1  -7  -1   19.39    1.40 
  -1  -7  -1   21.74    1.38 
   1   7   1   21.01    1.40 
  -1   7  -1   21.13    1.41 
   1   7   1   21.41    1.46 
   1   7   1   18.71    1.38 
  -1   7  -1   20.55    1.44 
  -1   7  -1   19.59    1.39 
  -1   7  -1   19.74    1.37 
   1   7   1   18.81    1.38 
   1   7   1   20.47    1.38 
   1   7   1   20.97    1.42 
  -2  -7  -1   10.17    0.74 
  -2  -7  -1   11.25    0.74 
  -2  -7  -1   10.69    0.75 
  -2  -7  -1   10.97    0.78 
   2   7   1    9.11    0.76 
  -2   7  -1    9.21    0.74 
  -2   7  -1   10.43    0.73 
   2   7   1    9.04    0.71 
   2   7   1    9.53    0.70 
   2   7   1   10.07    0.72 
  -2   7  -1    9.19    0.69 
  -2   7  -1    9.31    0.69 
  -2   7  -1   10.78    0.73 
  -2   7  -1   10.26    0.81 
   2   7   1    9.90    0.65 
   2   7   1    8.63    0.75 
  -3  -7  -1   10.75    0.76 
  -3  -7  -1   10.95    0.74 
  -3  -7  -1   11.10    0.73 
  -3  -7  -1   10.10    0.74 
   3   7   1    8.51    0.73 
  -3   7  -1    9.82    0.78 
   3   7   1    8.31    0.72 
   3   7   1   10.27    0.66 
  -3   7  -1   10.36    0.70 
  -3   7  -1   10.46    0.72 
  -3   7  -1    9.72    0.70 
  -4  -7  -1    5.38    0.41 
  -4  -7  -1    6.29    0.42 
  -4  -7  -1    6.44    0.45 
  -4   7  -1    4.17    0.40 
  -4   7  -1    5.93    0.39 
  -4   7  -1    4.87    0.35 
  -3  -8   1    4.97    0.37 
  -3  -8   1    5.59    0.40 
  -3  -8   1    5.13    0.37 
  -3   8   1    3.30    0.27 
  -3   8   1    3.94    0.29 
  -3   8   1    3.60    0.30 
   3   8  -1    2.79    0.30 
   3   8  -1    3.48    0.26 
  -2  -8   1    0.96    0.18 
  -2  -8   1    0.88    0.13 
  -2  -8   1    0.90    0.13 
  -2  -8   1    0.90    0.13 
  -2   8   1    0.87    0.16 
  -2   8   1    0.82    0.15 
   2   8  -1    0.90    0.20 
  -2   8   1    0.78    0.15 
   2   8  -1    1.08    0.19 
   2   8  -1    0.87    0.17 
   2   8  -1    0.63    0.13 
  -2   8   1    0.81    0.19 
  -2   8   1    0.65    0.15 
  -1  -8   1    2.41    0.22 
  -1  -8   1    2.50    0.22 
   1   8  -1    1.73    0.26 
  -1   8   1    1.93    0.29 
   1   8  -1    1.87    0.22 
   1   8  -1    2.47    0.25 
  -1   8   1    2.03    0.24 
  -1   8   1    2.43    0.25 
   1   8  -1    2.46    0.30 
   1   8  -1    1.87    0.24 
  -1   8   1    2.06    0.25 
  -1   8   1    2.21    0.25 
   0  -8   1    1.95    0.19 
   0  -8  -1    2.46    0.20 
   0  -8   1    2.14    0.19 
   0  -8  -1    2.36    0.20 
   0   8   1    2.29    0.25 
   0   8   1    1.75    0.23 
   0   8  -1    1.53    0.23 
   0   8   1    1.66    0.28 
   0   8   1    1.97    0.23 
   0   8  -1    1.93    0.28 
   0   8  -1    2.02    0.24 
   0   8   1    1.91    0.25 
   0   8  -1    1.94    0.24 
   0   8  -1    1.72    0.21 
  -1  -8  -1    0.55    0.13 
  -1  -8  -1    0.67    0.11 
  -1  -8  -1    0.66    0.11 
  -1   8  -1    0.38    0.14 
   1   8   1    0.38    0.16 
  -1   8  -1    0.47    0.13 
   1   8   1    0.54    0.17 
  -1   8  -1    0.49    0.14 
   1   8   1    0.66    0.14 
   1   8   1    0.41    0.12 
   1   8   1    0.36    0.13 
  -2  -8  -1   16.11    1.14 
  -2  -8  -1   16.71    1.16 
  -2  -8  -1   18.85    1.15 
  -2  -8  -1   18.72    1.16 
  -2   8  -1   11.65    0.78 
   2   8   1   11.37    0.77 
   2   8   1   10.02    0.81 
   2   8   1   10.44    0.78 
  -2   8  -1   11.21    0.81 
  -2   8  -1   10.99    0.78 
  -3  -8  -1   10.57    0.74 
  -3  -8  -1   11.24    0.71 
  -3  -8  -1   10.49    0.71 
  -3   8  -1    9.65    0.59 
   3   8   1    7.65    0.58 
   3   8   1    7.78    0.61 
  -3   8  -1    8.84    0.63 
   3   8   1    8.67    0.60 
   2   9  -1    0.28    0.09 
   2   9  -1    0.59    0.11 
   2   9  -1    0.43    0.10 
   2   9  -1    0.43    0.08 
  -1   9   1    0.36    0.09 
  -1   9   1    0.40    0.12 
   1   9  -1    0.38    0.11 
   1   9  -1    0.46    0.11 
   1   9  -1    0.40    0.12 
   1   9  -1    0.60    0.11 
  -1   9   1    0.55    0.10 
   0   9   1    1.73    0.21 
   0   9   1    1.20    0.13 
   0   9  -1    1.34    0.17 
   0   9   1    1.33    0.18 
   0   9  -1    1.56    0.18 
   0   9  -1    1.22    0.16 
  -1  -9  -1    1.18    0.14 
  -1   9  -1    0.78    0.13 
  -1   9  -1    0.84    0.14 
   1   9   1    0.82    0.11 
   1   9   1    0.93    0.14 
  -1   9  -1    0.94    0.15 
   1   9   1    0.66    0.12 
   1   9   1    0.89    0.15 
   2   9   1    1.19    0.14 
   2   9   1    1.19    0.14 
   7   0  -2    3.84    0.26 
   6   0  -2    8.05    0.51 
  -6   0   2    6.16    0.58 
  -6   0   2    6.99    0.52 
  -6   0   2    5.87    0.58 
   6   0  -2    7.05    0.49 
  -5   0   2   14.18    0.98 
  -5   0   2   14.42    1.06 
  -5   0   2   12.57    0.96 
   5   0  -2   12.30    1.01 
   5   0  -2   14.05    0.90 
  -5   0   2   12.46    1.03 
   5   0  -2   13.88    0.91 
   5   0  -2   13.94    0.91 
   5   0  -2   13.41    0.97 
  -5   0   2   12.27    1.15 
   4   0  -2   57.80    3.63 
  -4   0   2   60.20    3.68 
   4   0  -2   59.63    3.63 
  -4   0   2   56.09    3.85 
   4   0  -2   61.34    3.82 
   4   0  -2   53.91    3.66 
  -4   0   2   50.36    3.67 
  -4   0   2   52.82    3.63 
   4   0  -2   56.82    3.67 
  -4   0   2   62.08    3.66 
   4   0  -2   58.60    3.91 
  -3   0   2    0.02    0.07 
   3   0  -2    0.03    0.05 
  -3   0   2    0.08    0.08 
  -3   0   2    0.15    0.13 
  -3   0   2    0.22    0.51 
   3   0  -2    0.09    0.08 
   3   0  -2    0.47    0.51 
  -3   0   2    0.23    0.14 
  -3   0   2   -1.68    3.92 
   3   0  -2   -7.27    4.40 
   3   0  -2    0.01    0.05 
  -3   0   2    0.12    0.11 
   3   0  -2    0.13    0.06 
  -3   0   2    0.13    0.07 
   3   0  -2    0.15    0.07 
   3   0  -2    0.11    0.11 
   2   0  -2   78.10    5.23 
  -2   0   2   89.34    5.28 
   2   0  -2   87.25    5.47 
  -2   0   2   76.07    5.36 
   2   0  -2   85.18    5.33 
  -2   0   2   87.53    5.26 
   2   0  -2   78.03    5.26 
  -2   0   2   85.61    5.25 
  -2   0   2   91.70    7.48 
   2   0  -2   86.26    5.25 
  -2   0   2   88.85    5.50 
   2   0  -2   86.38    7.45 
  -2   0   2   74.05    5.28 
   1   0  -2  198.42   12.20 
   1   0  -2  209.03   12.33 
   1   0  -2  198.02   13.45 
  -1   0   2  215.36   13.48 
   1   0  -2  171.68   12.22 
  -1   0   2  198.56   12.22 
  -1   0   2  187.33   12.20 
  -1   0   2  186.54   12.23 
   1   0  -2  185.32   12.20 
  -1   0   2  200.61   12.33 
  -1   0   2  202.68   12.21 
   0   0  -2   93.76    5.71 
   0   0  -2   95.53    6.55 
   0   0   2   96.70    5.76 
   0   0  -2   89.16    5.67 
   0   0  -2   86.60    5.68 
   0   0   2   93.08    5.69 
   0   0   2   79.56    5.69 
   0   0  -2   87.96    5.70 
   0   0  -2   88.68    5.75 
   0   0   2  101.24    6.59 
  -1   0  -2    0.78    0.12 
   1   0   2    1.07    0.25 
  -1   0  -2    0.94    0.19 
   1   0   2    0.81    0.12 
  -1   0  -2    0.88    0.10 
   1   0   2    0.12    0.97 
   1   0   2    0.80    0.13 
   1   0   2    0.81    0.15 
  -1   0  -2    1.04    1.21 
  -1   0  -2    0.90    0.21 
  -1   0  -2    0.71    0.10 
   2   0   2  120.05    9.74 
   2   0   2  116.11    7.34 
  -2   0  -2  117.59   10.30 
  -2   0  -2  122.56    7.61 
  -2   0  -2  110.49    7.46 
   2   0   2  120.07    7.64 
  -2   0  -2  119.14    7.32 
  -2   0  -2  119.28    7.33 
   2   0   2  113.28    7.36 
  -2   0  -2  115.97    7.32 
  -2   0  -2  114.04    7.35 
   2   0   2  115.47    7.41 
   3   0   2   13.17    6.03 
  -3   0  -2    0.70    0.13 
  -3   0  -2   -8.32    8.09 
  -3   0  -2    0.65    0.12 
   3   0   2    0.73    0.17 
   3   0   2    0.69    0.10 
  -3   0  -2   -0.42    0.87 
   3   0   2    0.70    0.10 
   3   0   2    0.69    0.22 
   3   0   2    0.91    0.15 
  -4   0  -2   -0.06    0.16 
  -4   0  -2    0.11    0.20 
   4   0   2    0.09    0.12 
   4   0   2    0.07    0.06 
   4   0   2    0.08    0.10 
  -4   0  -2    0.04    0.10 
   4   0   2    0.04    0.07 
   4   0   2    0.12    0.17 
   4   0   2    0.05    0.22 
  -4   0  -2    0.03    0.09 
  -4   0  -2    0.03    0.09 
  -4   0  -2   -0.01    0.08 
   5   0   2   10.82    0.71 
  -5   0  -2    9.68    0.74 
  -5   0  -2   10.06    1.08 
   5   0   2    9.91    0.71 
   5   0   2   10.28    0.71 
  -5   0  -2   10.97    0.91 
  -5   0  -2   10.54    0.76 
  -6   0  -2    4.04    0.36 
   6   0   2    3.86    0.30 
  -7  -1   2    6.85    0.40 
   7  -1  -2    4.90    0.39 
   7   1  -2    5.36    0.35 
   6  -1  -2    2.32    0.23 
  -6  -1   2    2.58    0.28 
   6  -1  -2    3.07    0.25 
   6  -1  -2    1.84    0.25 
   6   1  -2    1.87    0.21 
   6   1  -2    2.26    0.20 
  -6   1   2    2.74    0.25 
  -6   1   2    2.57    0.31 
   5  -1  -2   23.50    1.45 
  -5  -1   2   21.93    1.40 
  -5  -1   2   18.77    1.48 
   5  -1  -2   19.57    1.49 
   5  -1  -2   22.93    1.37 
  -5  -1   2   18.27    1.61 
   5  -1  -2   22.43    1.38 
  -5  -1   2   19.51    1.48 
  -5  -1   2   21.94    1.43 
  -5  -1   2   20.64    1.44 
  -5   1   2   22.28    1.43 
   5   1  -2   20.72    1.36 
  -5   1   2   20.86    1.64 
  -5   1   2   22.13    1.52 
   5   1  -2   19.12    1.34 
  -5   1   2   20.18    1.39 
   5   1  -2   20.66    1.47 
   5   1  -2   21.65    1.34 
  -5   1   2   18.18    1.38 
  -5   1   2   20.25    1.51 
   5   1  -2   21.25    1.43 
   4  -1  -2    4.79    0.35 
  -4  -1   2    4.73    0.44 
  -4  -1   2    4.99    0.34 
   4  -1  -2    4.59    0.35 
  -4  -1   2    5.11    0.42 
  -4  -1   2    4.79    0.42 
   4  -1  -2    4.62    0.38 
   4  -1  -2    4.98    0.56 
  -4  -1   2    4.46    0.42 
  -4  -1   2    3.79    0.45 
   4  -1  -2    4.07    0.43 
  -4  -1   2    4.41    0.53 
   4   1  -2    4.54    0.42 
  -4   1   2    4.62    0.40 
   4   1  -2    4.58    0.34 
   4   1  -2    4.40    0.33 
  -4   1   2    4.46    0.46 
  -4   1   2    4.00    0.37 
   4   1  -2    4.78    0.51 
   4   1  -2    4.58    0.38 
  -4   1   2    3.90    0.38 
  -4   1   2    4.35    0.53 
  -3  -1   2   45.45    3.02 
   3  -1  -2   60.25    7.96 
   3  -1  -2   47.73    3.38 
   3  -1  -2   49.25    3.02 
   3  -1  -2   43.90    3.04 
  -3  -1   2   47.78    3.03 
  -3  -1   2   49.34    3.12 
  -3  -1   2   48.25    3.06 
  -3  -1   2   46.05    3.14 
   3  -1  -2   46.84    3.16 
  -3  -1   2   48.87    2.99 
   3  -1  -2   47.94    2.99 
  -3  -1   2   37.09    7.62 
  -3  -1   2   46.36    3.07 
  -3  -1   2   43.32    3.51 
  -3  -1   2   51.16    3.08 
  -3   1   2   46.65    2.92 
   3   1  -2   46.54    2.94 
  -3   1   2   44.22    2.94 
   3   1  -2   47.66    3.07 
   3   1  -2   45.69    3.00 
  -3   1   2   45.87    6.64 
   3   1  -2   48.02    2.95 
   3   1  -2   50.50    3.51 
   3   1  -2   47.09    2.97 
  -3   1   2   47.66    3.11 
   3   1  -2   45.19    2.97 
   3   1  -2   52.53    8.15 
  -3   1   2   42.64    3.29 
   2  -1  -2   93.26    6.26 
  -2  -1   2  100.46    8.63 
   2  -1  -2   96.46    6.34 
   2  -1  -2  106.03    6.44 
  -2  -1   2  100.39    6.26 
  -2  -1   2  106.89    6.31 
   2  -1  -2   94.46    6.24 
  -2  -1   2  102.23    6.55 
   2  -1  -2  106.87    8.29 
  -2  -1   2   90.08    6.29 
  -2  -1   2   99.74    6.29 
  -2  -1   2   95.63    6.24 
   2  -1  -2  108.72    6.28 
  -2   1   2   95.70    6.25 
  -2   1   2   92.51    6.43 
   2   1  -2  105.03    6.53 
   2   1  -2  110.51    9.08 
   2   1  -2  104.44    6.33 
  -2   1   2  102.10    6.24 
   2   1  -2   83.95    6.27 
   2   1  -2   99.47    6.27 
   2   1  -2  101.08    6.26 
  -2   1   2  111.15    8.01 
   2   1  -2   97.29    6.24 
  -2   1   2  112.43    6.24 
  -2   1   2   94.14    6.29 
  -2   1   2   98.31    6.34 
   1  -1  -2  122.25    8.95 
   1  -1  -2  131.58    8.85 
  -1  -1   2  118.83    7.97 
   1  -1  -2  143.47    7.98 
  -1  -1   2  134.77    8.00 
   1  -1  -2  123.22    7.96 
   1  -1  -2  121.56    7.95 
  -1  -1   2  129.87    9.40 
  -1  -1   2  122.78    7.96 
   1  -1  -2  120.93    8.05 
  -1  -1   2  129.96    8.13 
   1   1  -2  111.39    8.20 
  -1   1   2  132.22    8.13 
   1   1  -2  127.80    9.61 
   1   1  -2  128.89    8.15 
  -1   1   2  137.29    8.22 
   1   1  -2  135.21    8.29 
  -1   1   2  130.27    8.19 
   1   1  -2  128.72    8.14 
  -1   1   2  138.30    8.25 
   0  -1   2   98.90    6.33 
   0  -1  -2  104.28    7.32 
   0  -1  -2   98.71    6.26 
   0  -1   2  106.56    6.35 
   0  -1   2   96.18    6.29 
   0  -1  -2  110.40    6.33 
   0  -1   2   98.19    6.27 
   0  -1  -2  102.14    6.28 
   0  -1  -2   97.92    6.27 
   0  -1   2   89.05    7.08 
   0  -1   2   92.96    6.27 
   0  -1  -2  103.76    6.36 
   0   1   2   91.80    5.85 
   0   1   2   90.26    5.85 
   0   1   2   92.68    5.84 
   0   1   2   82.44    5.83 
   0   1   2   91.22    5.84 
   0   1  -2   84.44    5.83 
   0   1  -2  100.26    5.83 
   0   1  -2   93.43    5.86 
   0   1  -2   99.39    5.84 
   0   1   2  100.68    6.76 
   0   1  -2   99.25    5.83 
   0   1   2   95.08    5.94 
  -1  -1  -2    9.46    0.70 
   1  -1   2    9.40    0.60 
   1  -1   2    9.04    0.73 
  -1  -1  -2    9.32    0.61 
  -1  -1  -2    8.48    0.59 
   1  -1   2    8.72    0.61 
   1  -1   2   11.16    1.92 
  -1  -1  -2    8.97    0.62 
   1  -1   2    8.93    0.65 
  -1  -1  -2    8.67    2.23 
  -1  -1  -2   10.08    0.78 
  -1   1  -2    8.17    0.57 
  -1   1  -2    8.11    0.56 
  -1   1  -2    9.00    0.68 
  -1   1  -2    9.14    0.56 
  -1   1  -2    7.77    0.61 
   1   1   2    8.22    0.57 
   1   1   2    8.54    0.59 
   1   1   2   14.23    2.25 
  -1   1  -2    9.43    1.90 
   1   1   2    9.08    0.62 
   1   1   2    8.46    0.55 
   1   1   2    8.93    0.77 
   2  -1   2    9.12    0.86 
   2  -1   2    7.43    0.55 
   2  -1   2    7.73    0.60 
  -2  -1  -2    7.54    0.50 
  -2  -1  -2    7.53    0.67 
   2  -1   2    7.87    0.53 
  -2  -1  -2    8.02    0.84 
   2  -1   2    5.22    2.15 
   2  -1   2    6.82    0.49 
  -2  -1  -2    7.90    0.53 
  -2  -1  -2    9.48    3.74 
  -2  -1  -2    7.24    0.56 
   2   1   2    7.56    0.94 
   2   1   2    7.74    0.57 
  -2   1  -2    7.54    0.63 
   2   1   2    7.89    0.62 
   2   1   2    7.61    0.50 
   2   1   2    8.54    2.89 
   2   1   2    7.72    0.49 
  -2   1  -2    4.23    2.92 
  -2   1  -2    7.65    0.52 
  -2   1  -2    7.62    0.76 
   2   1   2    7.63    0.55 
  -3  -1  -2   30.82    2.02 
  -3  -1  -2   30.65    1.98 
   3  -1   2   31.15    1.94 
  -3  -1  -2   30.87    1.97 
  -3  -1  -2   28.42    2.19 
  -3  -1  -2   29.59    1.97 
   3  -1   2   29.35    1.93 
  -3  -1  -2   31.87   10.63 
   3  -1   2   31.31    2.10 
   3  -1   2   32.26    1.99 
   3  -1   2   29.81    2.02 
   3   1   2   30.84    1.96 
   3   1   2   31.16    1.90 
  -3   1  -2   31.13    1.90 
  -3   1  -2   28.36    1.96 
  -3   1  -2   28.80    2.11 
   3   1   2   28.82    3.03 
  -3   1  -2   24.02    8.40 
   3   1   2   30.98    1.91 
   3   1   2   31.20    2.01 
   3   1   2   30.42    2.07 
  -3   1  -2   29.47    2.04 
   3   1   2   26.99    2.04 
   3   1   2   33.12    9.67 
  -3   1  -2   29.64    1.93 
  -4  -1  -2   11.78    0.92 
  -4  -1  -2   11.54    0.78 
  -4  -1  -2   10.69    0.72 
   4  -1   2   11.03    0.80 
   4  -1   2   10.11    0.99 
   4  -1   2    9.93    0.87 
  -4  -1  -2    9.99    0.81 
  -4  -1  -2    9.60    0.78 
   4  -1   2   11.26    0.95 
   4  -1   2   10.95    0.72 
   4  -1   2   11.46    0.74 
   4   1   2   10.36    0.95 
   4   1   2   10.73    0.74 
  -4   1  -2   11.52    0.79 
  -4   1  -2   11.92    1.02 
   4   1   2   11.13    0.73 
  -4   1  -2    9.80    0.78 
  -4   1  -2    9.97    1.00 
   4   1   2   11.34    0.88 
   4   1   2   11.88    0.79 
  -4   1  -2   11.31    0.87 
   4   1   2   10.59    0.82 
  -4   1  -2   10.61    0.77 
  -4   1  -2   11.03    0.85 
   4   1   2   10.43    0.95 
   5  -1   2    1.14    0.16 
   5  -1   2    1.72    0.24 
   5  -1   2    1.04    0.27 
  -5  -1  -2    0.66    0.32 
  -5  -1  -2    1.35    0.22 
  -5  -1  -2    1.23    0.28 
   5   1   2    1.59    0.19 
   5   1   2    1.43    0.21 
  -5   1  -2    1.13    0.22 
   5   1   2    1.14    0.14 
  -5   1  -2    1.63    0.34 
  -5   1  -2    1.02    0.22 
  -5   1  -2    1.36    0.39 
  -5   1  -2    1.34    0.20 
   5   1   2    0.81    0.30 
   5   1   2    1.29    0.28 
   6  -1   2    1.85    0.20 
  -6  -1  -2    2.36    0.21 
   6  -1   2    2.19    0.19 
   6  -1   2    2.16    0.19 
  -6  -1  -2    2.58    0.24 
   6   1   2    1.96    0.18 
  -6   1  -2    2.68    0.27 
  -6  -2   2   28.06    1.92 
  -6  -2   2   30.93    1.92 
   6  -2  -2   30.31    1.86 
   6  -2  -2   26.79    1.86 
  -6   2   2   27.07    1.82 
  -6   2   2   27.35    1.81 
  -6   2   2   27.37    1.87 
   6   2  -2   28.55    1.75 
  -6   2   2   26.61    1.88 
   5  -2  -2   30.75    1.97 
  -5  -2   2   31.14    2.05 
   5  -2  -2   32.63    1.98 
  -5  -2   2   30.11    1.94 
  -5  -2   2   32.30    2.00 
  -5  -2   2   26.61    2.20 
   5  -2  -2   30.28    2.01 
  -5  -2   2   29.33    2.04 
   5   2  -2   31.86    1.89 
   5   2  -2   26.72    1.96 
  -5   2   2   27.93    2.05 
  -5   2   2   32.22    1.97 
  -5   2   2   30.49    1.91 
   5   2  -2   26.45    1.87 
  -5   2   2   30.60    2.07 
   5   2  -2   29.79    2.00 
  -5   2   2   28.40    1.95 
  -5   2   2   28.70    2.18 
   4  -2  -2   41.98    2.63 
  -4  -2   2   46.61    2.79 
   4  -2  -2   37.26    2.70 
   4  -2  -2   43.92    2.63 
  -4  -2   2   41.41    2.75 
   4  -2  -2   41.50    2.62 
  -4  -2   2   43.87    2.63 
  -4  -2   2   38.05    2.66 
  -4  -2   2   39.19    2.83 
   4  -2  -2   37.08    2.86 
  -4  -2   2   36.53    2.69 
  -4  -2   2   41.83    2.66 
   4  -2  -2   44.26    2.66 
  -4  -2   2   42.60    2.72 
  -4   2   2   40.13    2.56 
  -4   2   2   40.29    2.71 
  -4   2   2   37.52    2.60 
   4   2  -2   35.39    2.53 
   4   2  -2   42.47    2.55 
   4   2  -2   39.28    2.53 
   4   2  -2   40.90    2.63 
  -4   2   2   43.55    2.66 
   4   2  -2   35.37    2.61 
  -4   2   2   41.57    2.71 
  -4   2   2   42.30    2.80 
  -4   2   2   40.41    2.60 
   4   2  -2   39.02    2.95 
   3  -2  -2   51.96    3.35 
   3  -2  -2   53.83    3.55 
  -3  -2   2   51.49    3.36 
  -3  -2   2   56.23    3.48 
  -3  -2   2   49.72    3.43 
  -3  -2   2   53.94    3.40 
   3  -2  -2   49.09    3.40 
  -3  -2   2   54.14    3.44 
   3  -2  -2   56.07    3.38 
   3  -2  -2   54.56    3.36 
   3  -2  -2   51.59    7.26 
  -3  -2   2   74.28   11.74 
  -3  -2   2   51.43    3.37 
  -3  -2   2   54.89    3.47 
   3   2  -2   55.12    4.11 
  -3   2   2   54.84    3.44 
  -3   2   2   55.48    3.61 
   3   2  -2   53.06   10.56 
   3   2  -2   61.47    3.43 
   3   2  -2   48.79    3.42 
   3   2  -2   50.45    3.46 
   3   2  -2   53.43    3.45 
   3   2  -2   55.53    3.52 
   3   2  -2   52.85    3.48 
   3   2  -2   54.86    3.54 
   2  -2  -2   25.68    1.56 
   2  -2  -2   21.20    1.65 
  -2  -2   2   22.56    1.60 
  -2  -2   2   24.64    1.93 
  -2  -2   2   32.09    8.39 
  -2  -2   2   25.93    1.59 
   2  -2  -2   23.24    1.58 
   2  -2  -2   26.62    3.54 
  -2  -2   2   25.60    1.62 
   2  -2  -2   28.86    3.13 
   2  -2  -2   27.11    1.55 
  -2  -2   2   23.64    1.64 
   2   2  -2   28.18    2.02 
  -2   2   2   25.81    1.66 
  -2   2   2   27.22    1.77 
   2   2  -2   27.02    1.69 
   2   2  -2   21.74    1.67 
  -2   2   2   25.79    1.76 
   2   2  -2   24.20    1.68 
   2   2  -2   26.20    1.67 
   2   2  -2   22.68    4.56 
   2   2  -2   28.80    1.73 
  -1  -2   2  125.80    7.99 
  -1  -2   2  134.17    7.94 
  -1  -2   2  130.75    8.15 
   1  -2  -2  123.86    7.92 
   1  -2  -2  120.51    7.93 
  -1  -2   2  121.46    7.96 
  -1  -2   2  135.66    9.77 
   1  -2  -2  119.41    7.93 
   1  -2  -2  136.68    8.74 
  -1   2   2  131.83    8.11 
   1   2  -2  121.76    9.85 
  -1   2   2  129.96    8.09 
  -1   2   2  119.79    8.10 
   1   2  -2  137.40    8.08 
  -1   2   2  116.54    8.05 
   1   2  -2  139.53    8.24 
   1   2  -2  126.85    8.03 
   0  -2   2   30.53    2.07 
   0  -2   2   30.66    2.08 
   0  -2  -2   34.10    2.08 
   0  -2   2   31.44    2.11 
   0  -2  -2   36.68    2.16 
   0  -2  -2   40.08    3.49 
   0  -2  -2   31.43    2.07 
   0  -2  -2   34.35    2.07 
   0  -2   2   30.86    2.07 
   0  -2   2   34.74    2.17 
   0  -2  -2   35.17    2.18 
   0  -2   2   29.40    2.18 
   0   2  -2   34.22    3.22 
   0   2   2   35.36    2.13 
   0   2   2   30.00    2.00 
   0   2  -2   32.01    2.91 
   0   2   2   30.33    1.99 
   0   2   2   29.64    1.99 
   0   2   2   32.71    3.00 
   0   2  -2   32.06    2.01 
  -1  -2  -2   14.04    1.07 
   1  -2   2   12.10    0.89 
   1  -2   2   13.48    0.92 
   1  -2   2   12.20    0.86 
  -1  -2  -2   13.92    0.98 
  -1  -2  -2   13.28    0.86 
  -1  -2  -2   12.65    0.88 
  -1  -2  -2   12.20    0.84 
   1  -2   2   13.79    0.85 
   1  -2   2   14.27    0.86 
   1  -2   2   13.60    0.97 
   1  -2   2   11.31    1.92 
  -1  -2  -2   13.90    2.93 
  -1   2  -2   11.48    2.08 
   1   2   2   12.08    0.82 
  -1   2  -2   14.41    0.97 
   1   2   2   14.24    1.08 
   1   2   2   14.24    2.77 
   1   2   2   12.89    0.81 
  -1   2  -2   11.67    0.86 
   1   2   2   12.10    0.81 
   1   2   2   12.01    0.83 
   1   2   2   12.19    0.88 
  -2  -2  -2    9.99    0.67 
  -2  -2  -2    9.11    0.70 
  -2  -2  -2    5.00    5.50 
   2  -2   2    9.90    0.65 
   2  -2   2   12.02    2.87 
  -2  -2  -2    9.44    0.63 
   2  -2   2   10.08    0.74 
   2  -2   2    9.04    0.62 
   2  -2   2    9.77    0.68 
  -2  -2  -2    9.35    0.82 
   2  -2   2    8.62    0.92 
  -2  -2  -2   10.36    1.07 
   2   2   2    9.23    0.70 
  -2   2  -2    8.32    3.02 
  -2   2  -2    8.74    0.80 
   2   2   2    8.07    0.62 
   2   2   2   10.14    1.20 
   2   2   2    8.91    0.57 
  -2   2  -2    7.89    0.58 
   2   2   2    8.87    0.63 
   2   2   2    8.37    0.60 
  -2   2  -2    8.38    0.69 
   2   2   2   14.86    4.44 
   2   2   2    8.52    0.56 
   3  -2   2   11.05    0.84 
  -3  -2  -2   10.34    0.82 
  -3  -2  -2   10.61    1.02 
   3  -2   2   12.02    0.92 
  -3  -2  -2   12.03    0.85 
  -3  -2  -2   10.83    0.87 
   3  -2   2   11.08    0.74 
  -3  -2  -2   11.57    0.75 
  -3  -2  -2  -27.65   20.70 
   3  -2   2   12.60    0.81 
  -3  -2  -2   11.14    0.81 
  -3  -2  -2   11.51    0.76 
  -3  -2  -2   13.76    1.82 
   3   2   2   10.22    2.05 
   3   2   2   10.55    0.83 
  -3   2  -2   10.31    0.74 
   3   2   2   10.96    0.70 
  -3   2  -2    8.92    0.79 
  -3   2  -2   10.72    0.83 
   3   2   2   10.81    0.70 
  -3   2  -2   10.94    0.73 
   3   2   2   -3.11    9.44 
   3   2   2   11.32    0.89 
   3   2   2   11.27    0.83 
  -3   2  -2   10.85    0.92 
   3   2   2   10.43    0.76 
  -3   2  -2   -5.45   16.31 
   4  -2   2   12.98    0.93 
   4  -2   2   13.78    0.87 
  -4  -2  -2   13.37    0.92 
  -4  -2  -2   12.69    0.98 
  -4  -2  -2   12.84    0.87 
   4  -2   2   12.11    1.16 
   4  -2   2   13.13    0.86 
   4  -2   2   10.70    1.11 
  -4  -2  -2   13.82    1.06 
   4  -2   2   12.70    1.09 
   4   2   2   13.96    0.84 
  -4   2  -2   14.33    1.03 
  -4   2  -2   12.32    0.86 
   4   2   2   11.12    0.82 
   4   2   2   11.58    0.92 
  -4   2  -2   13.63    1.00 
   4   2   2   12.63    0.82 
  -4   2  -2   11.62    0.89 
  -4   2  -2   10.49    0.98 
   4   2   2   11.56    0.92 
  -4   2  -2   11.96    1.09 
  -4   2  -2   13.21    0.86 
  -5  -2  -2   25.31    2.26 
   5  -2   2   30.00    1.85 
  -5  -2  -2   28.71    1.90 
  -5  -2  -2   27.48    1.92 
   5  -2   2   34.24    2.04 
   5  -2   2   30.30    1.87 
   5  -2   2   26.76    1.85 
   5   2   2   25.09    1.69 
  -5   2  -2   26.15    1.81 
  -5   2  -2   28.66    1.90 
   5   2   2   23.60    1.75 
  -5   2  -2   27.31    1.70 
  -5   2  -2   24.08    1.74 
   5   2   2   30.47    2.01 
   6  -2   2    2.32    0.19 
   6  -2   2    2.61    0.20 
  -6  -2  -2    2.53    0.22 
  -6  -2  -2    2.49    0.24 
   6  -2   2    1.96    0.19 
  -6   2  -2    1.43    0.18 
   6   2   2    1.74    0.13 
  -6   2  -2    1.21    0.27 
   6  -3  -2    6.77    0.48 
   6  -3  -2    7.65    0.48 
  -6  -3   2    6.53    0.49 
  -6   3   2    7.16    0.54 
  -6   3   2    7.12    0.52 
   6   3  -2    6.92    0.55 
  -6   3   2    6.73    0.59 
  -6   3   2    8.05    0.63 
   5  -3  -2   21.24    1.50 
  -5  -3   2   22.22    1.54 
  -5  -3   2   25.09    1.56 
  -5  -3   2   22.37    1.65 
   5  -3  -2   22.64    1.56 
   5  -3  -2   25.37    1.52 
   5   3  -2   23.58    1.62 
  -5   3   2   24.76    1.84 
  -5   3   2   19.54    1.68 
   5   3  -2   24.49    1.52 
   5   3  -2   23.78    1.63 
  -4  -3   2   21.11    1.51 
  -4  -3   2   23.54    1.59 
  -4  -3   2   24.58    1.53 
   4  -3  -2   24.95    1.54 
  -4  -3   2   23.99    1.51 
   4  -3  -2   24.46    1.51 
  -4  -3   2   23.94    1.56 
   4  -3  -2   25.65    1.52 
  -4  -3   2   20.43    1.59 
   4  -3  -2   23.01    1.79 
  -4  -3   2   23.30    1.68 
  -4  -3   2   20.16    1.70 
  -4  -3   2   23.46    1.63 
  -4   3   2   23.83    1.69 
  -4   3   2   24.19    1.69 
  -4   3   2   24.47    1.58 
   4   3  -2   24.32    1.94 
   4   3  -2   24.34    1.75 
  -4   3   2   22.20    1.75 
  -4   3   2   22.03    1.59 
  -4   3   2   21.90    1.62 
   4   3  -2   22.41    1.58 
  -4   3   2   23.20    1.50 
   3  -3  -2    5.75    0.44 
   3  -3  -2    5.44    0.38 
  -3  -3   2    5.86    0.55 
  -3  -3   2    4.94    0.45 
  -3  -3   2    5.58    0.52 
  -3  -3   2    5.86    0.45 
  -3  -3   2    5.69    0.41 
  -3  -3   2    5.98    0.46 
  -3  -3   2    6.01    0.42 
   3  -3  -2    4.90    0.57 
  -3   3   2    5.47    0.40 
   3   3  -2    5.07    0.46 
   3   3  -2    5.29    0.47 
  -3   3   2    5.67    0.66 
  -3   3   2    6.01    0.58 
   3   3  -2    5.36    0.49 
  -3   3   2    5.33    0.52 
   3   3  -2    6.96    0.56 
   3   3  -2    5.39    0.44 
  -3   3   2    5.72    0.50 
   3   3  -2    5.42    0.39 
  -3   3   2    5.74    0.55 
   2  -3  -2  122.78    7.78 
  -2  -3   2  124.03    7.66 
  -2  -3   2  143.93   12.17 
   2  -3  -2  126.91    7.65 
   2  -3  -2  126.42    7.66 
  -2  -3   2  121.67    7.77 
   2  -3  -2  113.37    7.64 
  -2  -3   2  128.40    7.67 
  -2  -3   2  120.70    8.11 
  -2  -3   2  125.05    7.69 
  -2  -3   2  116.42    7.72 
  -2  -3   2  111.35    7.69 
   2   3  -2  128.93    8.27 
   2   3  -2  130.44    7.88 
   2   3  -2  125.74    7.95 
  -2   3   2  135.07    8.00 
   2   3  -2  112.81   11.57 
  -2   3   2  123.62    7.87 
   2   3  -2  119.93    7.86 
   2   3  -2  111.83    7.89 
   2   3  -2  130.24    7.92 
   1  -3  -2   15.16    1.11 
  -1  -3   2   15.94    1.13 
  -1  -3   2   17.31    1.08 
  -1  -3   2   16.63    1.10 
   1  -3  -2   17.90    1.14 
  -1  -3   2   16.27    1.17 
   1  -3  -2   17.52    1.08 
  -1  -3   2   19.16    1.42 
  -1  -3   2   22.15    3.67 
   1  -3  -2   17.35    1.09 
   1   3  -2   20.09    1.17 
  -1   3   2   19.32    1.29 
  -1   3   2   17.77    1.19 
   1   3  -2   19.89    1.45 
   1   3  -2   15.37    1.20 
   1   3  -2   21.59    3.94 
   0  -3  -2   30.46    3.72 
   0  -3  -2   33.73    2.27 
   0  -3   2   32.92    2.28 
   0  -3   2   36.31    2.37 
   0  -3  -2   39.41    2.39 
   0  -3  -2   30.58    2.26 
   0  -3   2   36.23    2.26 
   0  -3  -2   38.67    2.40 
   0  -3   2   37.70    2.33 
   0  -3  -2   36.35    2.28 
   0  -3   2   34.04    2.40 
   0  -3   2   34.70    2.25 
   0  -3  -2   40.26    2.26 
   0   3  -2   39.39    3.70 
   0   3  -2   35.88    2.21 
   0   3  -2   31.15    2.19 
   0   3   2   32.21    2.18 
   0   3  -2   36.48    2.18 
   0   3  -2   33.96    3.37 
  -1  -3  -2   50.86    3.41 
  -1  -3  -2   51.55    6.47 
   1  -3   2   56.50    3.35 
   1  -3   2   51.32    3.25 
   1  -3   2   49.88    3.25 
  -1  -3  -2   45.26    3.25 
  -1  -3  -2   53.18    3.27 
   1  -3   2   52.29    3.30 
  -1  -3  -2   54.63    3.53 
  -1   3  -2   51.22    3.18 
   1   3   2   46.40    3.46 
  -1   3  -2   50.75    3.24 
   1   3   2   54.77    5.88 
   1   3   2   50.62    3.18 
   2  -3   2   21.48    1.30 
  -2  -3  -2   20.78    1.30 
   2  -3   2   20.47    1.41 
  -2  -3  -2   19.20    1.37 
  -2  -3  -2   18.03    1.89 
  -2  -3  -2   20.18    1.52 
   2  -3   2   18.49    1.26 
  -2  -3  -2   18.76    1.32 
  -2  -3  -2   13.53    7.47 
  -2  -3  -2   21.24    1.33 
  -2  -3  -2   20.29    1.29 
   2   3   2   20.15    1.24 
  -2   3  -2   18.81    1.36 
  -2   3  -2   15.78    3.85 
   2   3   2   14.61    6.12 
   2   3   2   16.84    2.03 
  -3  -3  -2   17.39    1.11 
  -3  -3  -2   17.74    1.12 
   3  -3   2   17.08    1.09 
  -3  -3  -2   18.14    1.22 
  -3  -3  -2   16.35    1.43 
  -3  -3  -2   16.34    1.23 
   3  -3   2   17.41    1.14 
   3  -3   2   17.67    1.29 
  -3  -3  -2   16.67    1.24 
  -3  -3  -2   17.48    1.16 
  -3  -3  -2   14.50    1.24 
  -3  -3  -2   16.67    1.12 
   3   3   2   16.29    1.15 
   3   3   2   15.72    1.12 
  -3   3  -2   17.03    1.22 
  -3   3  -2   16.21    1.27 
  -3   3  -2   15.87    1.11 
  -3   3  -2   14.69    1.09 
   3   3   2   17.50    1.06 
  -3   3  -2   15.39    1.06 
   3   3   2   18.39    1.19 
  -3   3  -2   18.39    1.23 
  -3   3  -2   15.34    1.12 
   3   3   2   15.82    1.13 
   4  -3   2   44.61    2.90 
  -4  -3  -2   47.56    2.90 
   4  -3   2   47.27    3.23 
  -4  -3  -2   41.61    2.91 
  -4  -3  -2   47.21    2.85 
   4  -3   2   45.22    2.84 
   4  -3   2   40.88    2.83 
  -4  -3  -2   42.68    2.98 
   4  -3   2   44.88    2.83 
  -4   3  -2   44.87    2.91 
   4   3   2   41.45    2.80 
  -4   3  -2   41.59    2.76 
  -4   3  -2   46.15    2.90 
  -4   3  -2   40.34    2.99 
   4   3   2   46.12    2.72 
   4   3   2   41.34    2.82 
  -4   3  -2   42.29    2.71 
  -4   3  -2   40.51    2.79 
   5  -3   2    5.22    0.36 
   5  -3   2    4.93    0.36 
   5  -3   2    5.59    0.39 
  -5  -3  -2    4.54    0.43 
  -5  -3  -2    4.61    0.35 
  -5   3  -2    4.82    0.40 
  -5   3  -2    4.14    0.40 
   5   3   2    4.63    0.41 
  -5   3  -2    3.76    0.47 
  -5   3  -2    4.84    0.46 
   5   3   2    4.00    0.31 
   6  -3   2    0.41    0.07 
   6  -3   2    0.29    0.06 
  -6  -3  -2    0.38    0.12 
  -6  -3  -2    0.42    0.10 
   6   3   2    0.47    0.15 
  -6   3  -2    0.33    0.12 
  -6   3  -2    0.41    0.16 
  -6   3  -2    0.23    0.07 
   6  -4  -2   16.62    0.99 
   6  -4  -2   12.51    1.00 
  -6  -4   2   16.60    1.03 
  -6   4   2   18.26    1.31 
  -6   4   2   20.49    1.33 
   6   4  -2   19.82    1.28 
  -6   4   2   17.41    1.24 
  -5  -4   2    6.84    0.53 
  -5  -4   2    5.36    0.48 
  -5  -4   2    5.58    0.42 
   5  -4  -2    5.20    0.40 
  -5   4   2    4.98    0.45 
  -5   4   2    6.09    0.56 
  -5   4   2    4.78    0.52 
   5   4  -2    4.89    0.45 
  -5   4   2    5.20    0.45 
   4  -4  -2    7.52    0.58 
  -4  -4   2    8.10    0.59 
  -4  -4   2    8.20    0.57 
  -4  -4   2    8.49    0.58 
  -4  -4   2    7.41    0.69 
   4  -4  -2    7.41    0.57 
  -4  -4   2    7.95    0.64 
   4  -4  -2    7.99    0.55 
  -4  -4   2    8.28    0.68 
  -4  -4   2    9.92    0.92 
   4   4  -2    7.57    0.62 
  -4   4   2    7.65    0.65 
  -4   4   2    7.87    0.72 
  -4   4   2    8.13    0.61 
  -4   4   2    8.27    0.78 
   4   4  -2    6.86    0.63 
   4   4  -2    7.15    0.58 
  -4   4   2    8.34    0.72 
   4   4  -2    6.63    0.50 
  -4   4   2    7.13    0.61 
  -3  -4   2    9.06    0.79 
  -3  -4   2    8.62    0.73 
  -3  -4   2    9.52    0.64 
  -3  -4   2    9.14    0.68 
  -3  -4   2    9.16    0.63 
   3  -4  -2    8.60    0.59 
   3  -4  -2    9.26    0.61 
  -3  -4   2    8.99    0.64 
  -3   4   2    8.94    0.67 
  -3   4   2    8.99    0.77 
  -3   4   2    9.94    0.83 
   3   4  -2    8.04    0.67 
   3   4  -2    9.42    0.64 
  -3   4   2    8.98    0.72 
  -3   4   2    9.08    0.76 
   3   4  -2    8.46    0.70 
  -3   4   2    8.19    0.68 
   2  -4  -2    5.98    0.39 
   2  -4  -2    5.66    0.40 
  -2  -4   2    5.41    0.54 
  -2  -4   2    6.59    0.46 
  -2  -4   2    5.53    0.49 
  -2  -4   2    5.71    0.42 
  -2  -4   2    5.65    1.71 
  -2  -4   2    6.47    0.44 
   2   4  -2    6.34    0.40 
  -2   4   2    5.68    0.45 
   2   4  -2    5.75    0.47 
  -2   4   2    6.55    0.57 
  -2   4   2    5.10    0.52 
  -2   4   2    5.73    0.42 
  -2   4   2    5.09    0.46 
  -2   4   2    5.58    0.49 
   2   4  -2    4.96    0.44 
   1  -4  -2   19.49    1.33 
  -1  -4   2   20.50    1.46 
  -1  -4   2   19.95    1.33 
  -1  -4   2   19.44    1.40 
  -1  -4   2   21.27    1.36 
   1  -4  -2   19.58    1.37 
  -1  -4   2   20.83    1.34 
   1  -4  -2   21.78    1.50 
   1  -4  -2   23.06    1.32 
  -1  -4   2   23.54    1.80 
  -1   4   2   19.13    1.35 
  -1   4   2   21.92    1.47 
   0  -4   2   19.20    1.45 
   0  -4   2   20.33    1.34 
   0  -4  -2   20.52    1.51 
   0  -4  -2   19.60    1.37 
   0  -4   2   21.67    1.31 
   0  -4   2   19.26    1.29 
   0  -4   2   22.04    1.43 
   0  -4  -2   18.33    3.42 
   0  -4  -2   19.21    1.29 
   0  -4  -2   23.59    1.32 
   0  -4   2   18.12    1.34 
   0  -4   2   20.58    1.41 
   0   4  -2   19.68    1.31 
   0   4   2   19.55    3.02 
   0   4  -2   20.09    3.56 
   0   4   2   20.85    1.32 
   0   4  -2   15.73    2.90 
  -1  -4  -2   10.12    1.24 
  -1  -4  -2   10.01    0.72 
  -1  -4  -2   11.49    0.75 
   1  -4   2   11.78    0.85 
  -1  -4  -2   10.57    0.73 
   1  -4   2   11.02    0.72 
  -1  -4  -2   11.59    0.93 
   1  -4   2   11.27    0.79 
   1  -4   2   10.51    0.71 
  -1   4  -2   11.22    0.74 
  -1   4  -2   11.43    0.81 
   1   4   2    9.54    1.71 
   1   4   2    9.72    0.74 
   2  -4   2   37.38    2.34 
  -2  -4  -2   33.14    2.33 
  -2  -4  -2   33.05    2.44 
   2  -4   2   29.95    2.14 
  -2  -4  -2   33.93    2.17 
  -2  -4  -2   33.24    2.21 
  -2  -4  -2   33.45    2.28 
  -2  -4  -2   36.77    2.19 
  -2  -4  -2   35.12    2.22 
  -2   4  -2   30.73    2.20 
  -2   4  -2   38.39    2.24 
  -2   4  -2   33.23    2.28 
   2   4   2   31.06    2.19 
   2   4   2   35.33    2.25 
   2   4   2   33.96    2.18 
  -2   4  -2   36.17    2.30 
  -2   4  -2   32.64    2.30 
   2   4   2   32.80    2.17 
  -3  -4  -2   43.84    2.95 
  -3  -4  -2   47.12    2.80 
   3  -4   2   42.26    2.78 
   3  -4   2   42.26    2.98 
  -3  -4  -2   41.24    2.88 
  -3  -4  -2   47.44    2.82 
  -3  -4  -2   41.45    3.16 
  -3  -4  -2   45.08    3.00 
  -3  -4  -2   44.74    2.85 
   3  -4   2   47.79    2.82 
   3  -4   2   40.42    3.08 
   3  -4   2   42.00    2.77 
   3   4   2   44.03    2.66 
  -3   4  -2   38.45    2.54 
  -3   4  -2   36.07    2.54 
  -3   4  -2   45.54    2.82 
   3   4   2   39.74    2.71 
   3   4   2   36.94    2.54 
  -3   4  -2   35.90    2.73 
  -3   4  -2   37.57    2.71 
   3   4   2   40.30    2.56 
   4  -4   2   25.21    1.56 
  -4  -4  -2   22.74    1.72 
  -4  -4  -2   25.58    1.58 
   4  -4   2   23.88    1.61 
  -4  -4  -2   25.15    1.57 
  -4  -4  -2   24.88    1.63 
   4  -4   2   25.60    1.55 
  -4  -4  -2   20.17    1.56 
  -4  -4  -2   23.79    1.68 
  -4   4  -2   21.72    1.66 
   4   4   2   20.72    1.56 
  -4   4  -2   23.85    1.59 
  -4   4  -2   24.51    1.60 
   4   4   2   23.57    1.58 
  -4   4  -2   22.38    1.55 
  -4   4  -2   26.31    1.70 
   5  -4   2    0.55    0.09 
  -5  -4  -2    0.56    0.14 
   5  -4   2    0.62    0.10 
  -5  -4  -2    0.57    0.12 
   5  -4   2    0.58    0.10 
  -5   4  -2    0.32    0.15 
  -5   4  -2    0.76    0.16 
  -5   4  -2    0.55    0.17 
  -5   4  -2    0.47    0.19 
   5   4   2    0.71    0.17 
  -6   4  -2    1.32    0.16 
  -6   5   2    2.80    0.26 
  -6   5   2    2.67    0.22 
   6   5  -2    2.47    0.21 
  -5  -5   2    5.20    0.43 
  -5  -5   2    5.47    0.39 
   5  -5  -2    5.20    0.36 
  -5   5   2    5.40    0.42 
  -5   5   2    4.98    0.41 
   5   5  -2    5.09    0.42 
  -5   5   2    4.30    0.47 
   4  -5  -2    1.91    0.18 
  -4  -5   2    2.11    0.24 
   4  -5  -2    2.02    0.18 
  -4  -5   2    1.59    0.33 
  -4  -5   2    1.83    0.29 
  -4  -5   2    1.71    0.20 
  -4  -5   2    2.13    0.28 
   4   5  -2    1.77    0.37 
  -4   5   2    1.29    0.27 
  -4   5   2    2.38    0.48 
  -4   5   2    1.19    0.34 
  -4   5   2    1.62    0.30 
  -4   5   2    1.53    0.31 
  -3  -5   2   40.47    2.50 
  -3  -5   2   38.04    2.51 
  -3  -5   2   35.24    2.62 
   3  -5  -2   38.90    2.45 
  -3  -5   2   40.96    2.75 
   3  -5  -2   40.56    2.76 
  -3  -5   2   45.07    2.76 
   3  -5  -2   34.41    2.79 
   3  -5  -2   37.49    2.45 
  -3   5   2   36.56    2.44 
  -3   5   2   36.63    2.47 
   3   5  -2   34.60    2.43 
   3   5  -2   35.53    2.45 
   3   5  -2   37.39    2.50 
  -3   5   2   39.65    2.45 
  -3   5   2   38.98    2.56 
  -3   5   2   36.56    2.51 
  -3   5   2   40.22    2.47 
  -3   5   2   36.28    2.57 
  -3   5   2   39.22    2.43 
  -2  -5   2    2.48    0.26 
   2  -5  -2    1.99    0.32 
  -2  -5   2    2.57    0.22 
  -2  -5   2    2.65    0.38 
  -2  -5   2    2.71    0.24 
  -2  -5   2    2.41    0.23 
   2  -5  -2    3.15    0.45 
  -2   5   2    2.71    0.33 
   2   5  -2    2.50    0.31 
  -2   5   2    2.45    0.26 
  -2   5   2    2.20    0.23 
  -2   5   2    2.73    0.29 
  -2   5   2    2.74    0.39 
  -2   5   2    2.38    0.24 
  -2   5   2    2.48    0.31 
  -2   5   2    2.55    0.25 
  -2   5   2    2.41    0.35 
   2   5  -2    2.25    0.25 
   2   5  -2    2.34    0.26 
   2   5  -2    2.14    0.26 
  -2   5   2    2.25    0.28 
   1  -5  -2   20.00    1.37 
  -1  -5   2   22.26    1.39 
  -1  -5   2   23.44    1.40 
  -1  -5   2   18.46    1.46 
  -1  -5   2   21.15    1.55 
  -1  -5   2   23.84    1.43 
  -1   5   2   22.11    1.43 
  -1   5   2   19.93    1.39 
   1   5  -2   20.24    1.42 
   1   5  -2   20.69    1.43 
  -1   5   2   21.46    1.43 
  -1   5   2   22.63    1.41 
   1   5  -2   18.75    1.37 
  -1   5   2   22.96    1.53 
  -1   5   2   22.66    1.43 
  -1   5   2   22.32    1.55 
  -1   5   2   19.23    1.41 
   1   5  -2   19.40    1.39 
  -1   5   2   22.37    1.48 
   0  -5   2   12.86    0.98 
   0  -5   2   12.85    0.85 
   0  -5  -2   13.59    0.86 
   0  -5   2   12.85    0.83 
   0  -5  -2   12.02    0.84 
   0  -5  -2   14.37    1.07 
   0  -5  -2   11.73    0.83 
   0   5   2   10.88    0.81 
   0   5   2   13.79    0.85 
   0   5  -2   11.05    0.82 
   0   5   2   11.09    0.84 
   0   5   2   11.00    0.76 
   0   5  -2   11.78    0.91 
   0   5  -2   12.23    0.84 
   0   5   2   11.63    0.82 
   0   5  -2   11.65    0.84 
   0   5   2   12.36    0.88 
   1  -5   2   42.54    2.90 
   1  -5   2   43.20    2.84 
  -1  -5  -2   43.60    2.75 
  -1  -5  -2   43.06    3.00 
  -1  -5  -2   42.82    2.77 
  -1  -5  -2   45.62    2.76 
  -1  -5  -2   49.49    2.98 
  -1  -5  -2   38.55    2.83 
   1  -5   2   43.32    2.73 
   1  -5   2   39.33    2.70 
   1   5   2   40.46    2.66 
   1   5   2   39.09    2.61 
   1   5   2   42.25    2.64 
  -1   5  -2   42.24    2.67 
   1   5   2   45.67    2.69 
  -1   5  -2   40.96    2.71 
   1   5   2   37.89    2.63 
   1   5   2   42.29    2.69 
  -1   5  -2   38.56    2.65 
  -1   5  -2   36.95    2.63 
  -1   5  -2   42.64    2.74 
  -2  -5  -2    1.64    0.25 
  -2  -5  -2    1.74    0.19 
  -2  -5  -2    1.65    0.23 
   2  -5   2    1.62    0.12 
  -2  -5  -2    1.66    0.19 
  -2  -5  -2    1.45    0.18 
  -2  -5  -2    1.07    0.23 
   2  -5   2    1.83    0.35 
  -2  -5  -2    1.94    0.47 
   2  -5   2    1.79    0.16 
  -2  -5  -2    1.15    0.26 
  -2   5  -2    1.37    0.21 
  -2   5  -2    1.60    0.24 
  -2   5  -2    1.35    0.26 
   2   5   2    1.66    0.30 
  -2   5  -2    1.37    0.27 
  -2   5  -2    1.77    0.31 
  -2   5  -2    1.52    0.21 
  -2   5  -2    1.28    0.21 
   2   5   2    1.61    0.24 
   2   5   2    1.61    0.21 
   2   5   2    1.51    0.20 
   2   5   2    1.62    0.25 
   2   5   2    1.83    0.29 
  -2   5  -2    1.40    0.28 
  -3  -5  -2   10.46    0.80 
  -3  -5  -2   10.58    0.72 
  -3  -5  -2   10.22    0.73 
  -3  -5  -2   10.09    0.73 
   3  -5   2   11.02    0.71 
  -3  -5  -2    9.45    0.87 
   3  -5   2   10.25    0.67 
  -3  -5  -2   10.10    0.77 
   3   5   2    8.77    0.70 
  -3   5  -2    9.87    0.73 
  -3   5  -2   10.91    0.76 
  -3   5  -2   11.24    0.85 
   3   5   2   10.06    0.79 
   3   5   2    9.87    0.72 
   3   5   2    9.40    0.74 
  -3   5  -2    9.64    0.80 
  -3   5  -2    8.69    0.69 
  -3   5  -2    8.13    0.83 
  -4  -5  -2   12.52    0.87 
   4  -5   2   13.78    0.86 
   4  -5   2   12.41    0.82 
  -4  -5  -2   11.86    0.85 
  -4  -5  -2   13.20    0.90 
  -4  -5  -2   11.74    0.85 
  -4   5  -2   11.88    0.85 
   4   5   2   12.68    0.85 
   4   5   2   10.12    0.82 
  -4   5  -2   12.08    0.94 
  -4   5  -2   11.77    0.85 
  -4   5  -2   11.90    0.93 
   5  -5   2    5.21    0.34 
  -5  -5  -2    4.60    0.34 
  -5   5  -2    4.11    0.32 
  -5   5  -2    3.89    0.39 
  -5  -6   2    1.75    0.16 
  -5  -6   2    2.02    0.20 
  -5   6   2    2.08    0.21 
  -5   6   2    1.63    0.24 
  -5   6   2    1.78    0.24 
  -5   6   2    1.86    0.20 
   5   6  -2    1.84    0.19 
  -4  -6   2   31.47    1.81 
  -4  -6   2   24.46    1.79 
  -4  -6   2   30.05    1.83 
  -4  -6   2   23.90    1.77 
   4   6  -2   28.18    1.70 
  -4   6   2   28.75    1.73 
  -4   6   2   24.90    1.78 
  -4   6   2   26.62    1.70 
   4   6  -2   21.79    1.72 
  -4   6   2   23.46    1.79 
  -3  -6   2    3.34    0.31 
  -3  -6   2    3.70    0.33 
  -3  -6   2    4.00    0.45 
  -3  -6   2    3.74    0.32 
  -3  -6   2    3.71    0.56 
  -3   6   2    3.97    0.50 
  -3   6   2    3.70    0.47 
   3   6  -2    3.11    0.39 
  -3   6   2    3.11    0.38 
   3   6  -2    3.22    0.39 
  -3   6   2    3.34    0.35 
  -3   6   2    3.44    0.38 
  -3   6   2    2.95    0.41 
   3   6  -2    3.27    0.32 
  -2  -6   2    8.02    0.60 
  -2  -6   2    8.23    0.63 
  -2  -6   2    8.04    0.86 
  -2  -6   2    8.83    0.60 
  -2  -6   2    8.69    0.61 
   2   6  -2    7.90    0.62 
  -2   6   2    8.75    0.62 
  -2   6   2    8.13    0.62 
   2   6  -2    7.15    0.58 
  -2   6   2    8.00    0.68 
   2   6  -2    7.44    0.57 
  -2   6   2    8.65    0.69 
  -2   6   2    7.76    0.75 
  -2   6   2    7.79    0.59 
   2   6  -2    7.34    0.64 
  -2   6   2    7.06    0.57 
  -2   6   2    7.17    0.61 
  -2   6   2    7.99    0.72 
  -2   6   2    8.07    0.60 
  -1  -6   2    1.52    0.19 
   1  -6  -2    1.36    0.13 
   1  -6  -2    1.45    0.14 
  -1  -6   2    1.81    0.34 
   1  -6  -2    1.56    0.34 
  -1  -6   2    1.53    0.17 
   1  -6  -2    1.34    0.53 
  -1  -6   2    1.46    0.16 
  -1   6   2    1.64    0.24 
   1   6  -2    1.25    0.22 
  -1   6   2    1.44    0.21 
   1   6  -2    1.30    0.19 
  -1   6   2    1.78    0.26 
  -1   6   2    1.45    0.29 
   1   6  -2    1.69    0.24 
  -1   6   2    1.45    0.28 
  -1   6   2    1.21    0.21 
   1   6  -2    1.62    0.25 
  -1   6   2    1.55    0.31 
   1   6  -2    1.80    0.21 
  -1   6   2    1.40    0.21 
   0  -6   2    3.89    0.29 
   0  -6   2    3.40    0.46 
   0  -6   2    3.71    0.28 
   0  -6  -2    3.85    0.50 
   0  -6  -2    3.48    0.57 
   0  -6  -2    3.98    0.28 
   0  -6  -2    3.87    0.30 
   0  -6   2    3.45    0.30 
   0  -6  -2    4.09    0.31 
   0   6   2    3.53    0.34 
   0   6   2    4.22    0.41 
   0   6   2    3.39    0.42 
   0   6   2    3.72    0.37 
   0   6  -2    3.63    0.37 
   0   6   2    3.78    0.37 
   0   6  -2    3.97    0.46 
   0   6  -2    3.90    0.33 
   0   6  -2    3.48    0.43 
   0   6   2    3.53    0.35 
   0   6  -2    3.42    0.34 
   0   6  -2    3.64    0.37 
   0   6   2    3.50    0.48 
  -1  -6  -2    6.82    0.47 
  -1  -6  -2    6.33    0.51 
   1  -6   2    6.28    0.43 
  -1  -6  -2    6.94    0.49 
  -1  -6  -2    6.70    0.49 
   1  -6   2    7.48    0.69 
  -1  -6  -2    5.25    0.77 
   1   6   2    6.70    0.53 
  -1   6  -2    5.79    0.61 
   1   6   2    7.02    0.57 
  -1   6  -2    6.19    0.54 
   1   6   2    6.80    0.58 
   1   6   2    6.56    0.54 
   1   6   2    6.32    0.46 
   1   6   2    6.35    0.72 
  -1   6  -2    6.95    0.55 
  -1   6  -2    6.21    0.52 
   1   6   2    6.82    0.53 
  -1   6  -2    6.71    0.57 
  -2  -6  -2    5.39    0.41 
  -2  -6  -2    5.10    0.46 
  -2  -6  -2    5.43    0.40 
  -2  -6  -2    5.32    0.41 
   2  -6   2    4.83    0.35 
  -2  -6  -2    5.26    0.45 
  -2   6  -2    4.42    0.42 
   2   6   2    5.22    0.41 
   2   6   2    4.75    0.45 
   2   6   2    4.97    0.44 
   2   6   2    5.35    0.50 
  -2   6  -2    5.32    0.46 
  -2   6  -2    5.16    0.44 
  -2   6  -2    4.70    0.42 
   2   6   2    5.18    0.48 
  -2   6  -2    6.02    0.56 
   2   6   2    4.54    0.42 
  -2   6  -2    4.45    0.46 
  -3  -6  -2    3.24    0.33 
   3  -6   2    2.89    0.23 
  -3  -6  -2    3.23    0.29 
  -3  -6  -2    3.10    0.29 
  -3  -6  -2    3.36    0.28 
   3   6   2    2.32    0.34 
   3   6   2    3.09    0.30 
  -3   6  -2    2.79    0.30 
  -3   6  -2    3.05    0.31 
   3   6   2    2.86    0.30 
  -3   6  -2    3.01    0.28 
   3   6   2    2.59    0.31 
  -3   6  -2    2.71    0.35 
  -4  -6  -2    2.46    0.21 
  -4  -6  -2    2.48    0.26 
  -4  -6  -2    2.15    0.22 
  -4  -6  -2    2.44    0.24 
  -4   6  -2    2.13    0.24 
   4   6   2    2.52    0.25 
  -4   6  -2    2.73    0.27 
  -4   6  -2    2.44    0.33 
  -5  -6  -2    2.09    0.16 
  -5   6  -2    3.07    0.29 
  -5   6  -2    3.00    0.25 
   5   6   2    2.83    0.23 
  -4  -7   2    6.10    0.44 
  -4  -7   2    6.60    0.47 
   4   7  -2    5.15    0.41 
  -4   7   2    5.29    0.42 
  -4   7   2    6.15    0.48 
   4   7  -2    6.08    0.41 
  -3  -7   2   15.09    1.00 
  -3  -7   2   12.61    0.92 
  -3  -7   2   12.50    0.93 
  -3  -7   2   14.99    0.96 
   3   7  -2   11.21    0.83 
   3   7  -2   11.79    0.74 
  -3   7   2   10.26    0.78 
   3   7  -2   10.10    0.78 
   3   7  -2   12.30    0.85 
  -3   7   2    9.43    0.79 
  -3   7   2   11.51    0.79 
  -2  -7   2    2.38    0.24 
  -2  -7   2    2.66    0.24 
  -2  -7   2    3.78    0.50 
  -2  -7   2    2.43    0.25 
   2   7  -2    2.53    0.20 
  -2   7   2    2.36    0.27 
  -2   7   2    2.45    0.34 
  -2   7   2    2.43    0.29 
  -2   7   2    2.39    0.25 
   2   7  -2    2.44    0.27 
  -2   7   2    2.40    0.34 
   2   7  -2    2.54    0.32 
   2   7  -2    2.57    0.25 
  -2   7   2    2.10    0.27 
   2   7  -2    2.27    0.28 
  -2   7   2    2.41    0.25 
   2   7  -2    2.26    0.31 
  -1  -7   2    7.51    0.52 
  -1  -7   2    6.23    0.54 
  -1  -7   2    7.21    0.50 
  -1   7   2    6.74    0.56 
  -1   7   2    6.14    0.55 
   1   7  -2    6.76    0.60 
   1   7  -2    7.48    0.58 
  -1   7   2    6.43    0.53 
  -1   7   2    7.08    0.70 
  -1   7   2    6.16    0.57 
   1   7  -2    7.24    0.59 
  -1   7   2    7.37    0.63 
   1   7  -2    6.29    0.53 
  -1   7   2    7.20    0.57 
   0  -7  -2   12.06    0.78 
   0  -7   2   10.79    0.78 
   0  -7  -2   11.99    0.77 
   0  -7   2   12.07    0.78 
   0  -7  -2   10.16    0.79 
   0  -7   2   11.67    0.76 
   0   7   2   11.08    0.83 
   0   7  -2   11.08    0.81 
   0   7   2   11.20    0.84 
   0   7  -2   12.45    0.89 
   0   7   2    9.92    0.86 
   0   7  -2   11.34    0.84 
   0   7   2   11.41    0.84 
   0   7   2   12.28    0.90 
   0   7   2   10.43    0.81 
   0   7  -2   10.82    0.83 
   0   7   2   10.88    0.81 
   1  -7   2    1.75    0.16 
  -1  -7  -2    2.40    0.27 
  -1  -7  -2    1.75    0.22 
  -1  -7  -2    1.67    0.19 
  -1  -7  -2    1.85    0.20 
  -1  -7  -2    2.11    0.32 
  -1   7  -2    1.69    0.33 
   1   7   2    1.51    0.28 
   1   7   2    1.21    0.30 
  -1   7  -2    1.45    0.28 
   1   7   2    1.60    0.31 
   1   7   2    1.32    0.28 
  -1   7  -2    2.12    0.32 
  -1   7  -2    2.02    0.32 
  -2  -7  -2   13.29    0.95 
  -2  -7  -2   13.52    0.90 
  -2  -7  -2   13.01    0.88 
  -2  -7  -2   12.68    0.89 
  -2   7  -2   11.26    0.92 
  -2   7  -2    9.59    0.81 
  -2   7  -2   12.56    0.85 
  -2   7  -2   10.95    0.80 
   2   7   2   11.73    0.88 
   2   7   2   11.12    0.87 
   2   7   2   11.85    0.82 
   2   7   2   11.67    0.76 
  -2   7  -2   11.77    0.82 
   2   7   2   11.79    0.83 
   2   7   2   12.28    0.84 
  -3  -7  -2   15.14    1.01 
  -3  -7  -2   14.42    0.99 
  -3  -7  -2   15.03    0.99 
  -3  -7  -2   15.16    1.00 
   3   7   2   12.36    0.98 
  -3   7  -2   15.30    0.97 
  -3   7  -2   13.70    1.03 
   3   7   2   11.40    0.91 
  -3   7  -2   14.55    0.96 
   3   7   2   14.48    0.91 
  -3   7  -2   13.17    1.02 
  -4  -7  -2    0.46    0.08 
  -4  -7  -2    0.48    0.11 
  -4   7  -2    0.46    0.15 
  -4   7  -2    0.63    0.15 
  -4   7  -2    0.71    0.09 
   4   7   2    0.53    0.13 
  -3  -8   2    1.30    0.14 
  -3  -8   2    1.35    0.14 
  -3  -8   2    1.35    0.18 
  -3   8   2    1.08    0.17 
  -3   8   2    0.89    0.13 
  -3   8   2    0.80    0.15 
   3   8  -2    1.01    0.12 
   3   8  -2    0.96    0.16 
   3   8  -2    0.99    0.17 
  -2  -8   2    0.38    0.09 
  -2  -8   2    0.34    0.09 
  -2  -8   2    0.29    0.08 
  -2  -8   2    0.42    0.13 
   2   8  -2    0.32    0.11 
  -2   8   2    0.28    0.13 
  -2   8   2    0.14    0.12 
   2   8  -2    0.30    0.15 
  -2   8   2    0.29    0.13 
  -2   8   2    0.32    0.12 
   2   8  -2    0.15    0.12 
   2   8  -2    0.46    0.14 
  -2   8   2    0.24    0.14 
  -2   8   2    0.27    0.12 
  -1  -8   2    0.75    0.11 
  -1  -8   2    0.66    0.11 
  -1   8   2    0.90    0.17 
   1   8  -2    0.76    0.17 
  -1   8   2    0.52    0.17 
   1   8  -2    0.92    0.17 
  -1   8   2    0.70    0.17 
  -1   8   2    0.89    0.22 
   1   8  -2    0.89    0.21 
   1   8  -2    0.66    0.17 
  -1   8   2    0.84    0.18 
   0  -8  -2    5.22    0.37 
   0  -8   2    4.77    0.36 
   0  -8  -2    4.99    0.35 
   0  -8   2    4.93    0.36 
   0   8  -2    4.11    0.39 
   0   8   2    4.86    0.38 
   0   8   2    3.56    0.38 
   0   8   2    4.24    0.38 
   0   8  -2    4.39    0.42 
   0   8  -2    4.49    0.37 
   0   8   2    4.66    0.40 
   0   8  -2    4.66    0.40 
   0   8   2    3.72    0.42 
  -1  -8  -2    0.74    0.12 
  -1  -8  -2    0.72    0.11 
  -1  -8  -2    0.75    0.12 
  -1   8  -2    0.24    0.11 
  -1   8  -2    0.62    0.15 
  -1   8  -2    0.43    0.14 
   1   8   2    0.41    0.15 
  -1   8  -2    0.46    0.11 
   1   8   2    0.60    0.16 
  -1   8  -2    0.39    0.14 
   1   8   2    0.51    0.13 
   1   8   2    0.60    0.19 
   1   8   2    0.34    0.11 
  -2  -8  -2   14.37    0.89 
  -2  -8  -2   11.98    0.90 
  -2  -8  -2   12.53    0.87 
  -2  -8  -2   14.50    0.88 
  -2   8  -2    9.35    0.67 
   2   8   2    9.32    0.67 
   2   8   2   11.27    0.74 
  -2   8  -2    9.14    0.73 
   2   8   2    8.87    0.70 
   2   8   2   10.25    0.70 
  -3  -8  -2    8.26    0.56 
  -3  -8  -2    8.31    0.56 
  -3   8  -2    6.79    0.54 
  -3   8  -2    7.65    0.50 
   2   9  -2    1.89    0.19 
  -2   9   2    1.95    0.18 
  -1   9   2    2.27    0.18 
   1   9  -2    1.62    0.20 
   1   9  -2    2.04    0.19 
   1   9  -2    2.18    0.22 
  -1   9   2    2.11    0.22 
  -1   9   2    1.91    0.20 
  -1   9   2    1.80    0.21 
   0   9  -2    5.09    0.38 
   0   9   2    5.32    0.36 
   0   9   2    4.54    0.37 
   0   9  -2    4.92    0.38 
   0   9   2    4.21    0.35 
   1   9   2    0.25    0.09 
  -1   9  -2    0.44    0.11 
   1   9   2    0.32    0.07 
   1   9   2    0.33    0.09 
   1   9   2    0.36    0.09 
   1   9   2    0.58    0.12 
  -1   9  -2    0.34    0.08 
   7   0  -3   -0.01    0.04 
  -6   0   3   26.81    1.95 
   6   0  -3   32.75    1.88 
   6   0  -3   28.00    1.86 
  -6   0   3   26.12    1.96 
  -6   0   3   31.03    1.91 
  -5   0   3   54.02    3.46 
  -5   0   3   55.55    3.40 
   5   0  -3   53.39    3.33 
  -5   0   3   50.65    3.38 
   5   0  -3   52.42    3.32 
   5   0  -3   49.36    3.43 
   5   0  -3   53.74    3.39 
  -5   0   3   48.29    3.58 
  -4   0   3   43.76    3.08 
  -4   0   3   46.83    3.02 
   4   0  -3   46.48    2.97 
   4   0  -3   48.23    3.02 
  -4   0   3   45.32    3.17 
   4   0  -3   46.72    3.05 
  -4   0   3   40.41    3.02 
   4   0  -3   50.37    3.43 
  -4   0   3   49.66    3.09 
  -4   0   3   51.15    3.01 
   4   0  -3   45.85    2.98 
  -3   0   3   26.71    1.84 
  -3   0   3    3.21    7.88 
   3   0  -3   28.76    1.82 
   3   0  -3   29.16    1.97 
   3   0  -3   29.09    1.85 
   3   0  -3   29.67    2.36 
  -3   0   3   28.13    1.96 
  -3   0   3   25.47    2.32 
  -3   0   3   31.95    1.87 
   3   0  -3   32.86    7.01 
   3   0  -3   28.14    1.88 
   3   0  -3   25.02    1.84 
  -3   0   3   27.77    1.91 
  -3   0   3   32.22    1.91 
  -3   0   3   29.65    1.95 
   3   0  -3   28.77    1.83 
   2   0  -3  214.79   13.41 
  -2   0   3  219.64   13.38 
   2   0  -3  219.64   16.00 
  -2   0   3  229.06   15.74 
  -2   0   3  204.08   13.58 
  -2   0   3  207.28   13.33 
   2   0  -3  200.91   13.34 
  -2   0   3  209.70   13.40 
  -2   0   3  203.15   13.40 
   2   0  -3  227.31   13.58 
   2   0  -3  216.67   13.33 
   1   0  -3  162.92   10.61 
  -1   0   3  171.88   10.65 
  -1   0   3  176.88   10.76 
   1   0  -3  180.03   12.07 
  -1   0   3  164.74   10.63 
  -1   0   3  171.32   10.79 
   1   0  -3  165.93   10.66 
  -1   0   3  174.59   10.64 
   1   0  -3  164.77   10.62 
   1   0  -3  165.84   12.19 
   0   0   3    3.21    0.25 
   0   0   3    3.15    0.27 
   0   0  -3    3.15    0.28 
   0   0  -3    3.27    0.25 
   0   0  -3    2.39    1.22 
   0   0   3    3.41    0.37 
   0   0  -3    3.12    0.23 
   0   0   3    3.08    0.24 
   0   0  -3    3.02    0.28 
   0   0  -3    3.67    0.40 
   0   0   3    3.75    1.41 
   0   0   3    3.41    0.27 
  -1   0  -3   38.61    2.59 
  -1   0  -3   41.32    2.68 
  -1   0  -3   36.96    2.51 
   1   0   3   38.51    2.53 
   1   0   3   38.73    2.57 
   1   0   3   41.93    4.27 
  -1   0  -3   45.96    4.61 
   1   0   3   41.06    2.73 
   1   0   3   39.83    2.52 
  -1   0  -3   41.50    2.53 
   2   0   3   13.88    0.93 
  -2   0  -3   12.90    0.89 
   2   0   3   13.45    0.86 
   2   0   3   13.23    0.85 
   2   0   3   15.04    1.11 
  -2   0  -3   17.39    4.65 
  -2   0  -3   12.63    1.03 
  -2   0  -3   12.21    1.18 
   2   0   3   13.90    1.38 
   2   0   3   13.49    0.91 
  -2   0  -3   12.40    0.89 
   2   0   3   14.28    3.30 
  -2   0  -3   13.64    0.92 
   3   0   3   67.39    4.34 
  -3   0  -3   61.02    4.27 
  -3   0  -3   73.43    4.41 
   3   0   3   63.58    4.23 
  -3   0  -3   67.24    4.30 
   3   0   3   72.17    4.29 
   3   0   3   66.32    4.29 
   3   0   3   67.00    4.42 
   3   0   3   66.31    4.23 
   4   0   3   13.00    1.01 
  -4   0  -3   12.94    0.89 
  -4   0  -3   11.48    1.13 
   4   0   3   13.12    0.85 
  -4   0  -3   14.33    1.06 
  -4   0  -3   10.70    0.89 
   4   0   3   13.30    0.95 
   4   0   3   10.82    1.11 
  -4   0  -3   14.33    0.91 
   4   0   3   12.39    1.10 
   4   0   3   12.46    0.86 
   4   0   3   13.58    0.86 
  -4   0  -3   12.80    0.91 
  -5   0  -3   35.15    2.22 
  -5   0  -3   36.07    2.21 
   5   0   3   33.23    2.17 
   5   0   3   32.77    2.16 
  -5   0  -3   29.93    2.34 
  -5   0  -3   38.74    3.05 
   5   0   3   33.21    2.17 
   6   0   3    7.62    0.51 
   6   0   3    7.59    0.52 
  -7  -1   3    2.00    0.16 
   7  -1  -3    1.44    0.13 
   7   1  -3    1.43    0.11 
  -6  -1   3   11.36    0.79 
   6  -1  -3   11.26    0.74 
   6  -1  -3   11.58    0.76 
  -6  -1   3    9.26    0.81 
   6   1  -3    9.74    0.66 
   6   1  -3    9.42    0.65 
  -6   1   3   10.11    0.79 
   5  -1  -3   86.87    5.55 
   5  -1  -3   80.47    5.60 
   5  -1  -3   91.41    5.50 
   5  -1  -3   91.91    5.51 
  -5  -1   3   82.84    5.56 
   5  -1  -3   92.73    5.51 
  -5  -1   3   93.68    5.55 
  -5  -1   3   75.77    5.72 
   5   1  -3   92.75    5.47 
   5   1  -3   89.74    5.54 
  -5   1   3   86.38    5.62 
   5   1  -3   88.23    5.58 
  -5   1   3   81.95    5.74 
   5   1  -3   83.49    5.45 
  -5   1   3   84.78    5.63 
   5   1  -3   86.39    5.46 
  -5   1   3   92.49    5.54 
  -5   1   3   85.02    5.51 
  -5   1   3   80.94    5.50 
   4  -1  -3   40.97    2.74 
  -4  -1   3   44.78    2.72 
   4  -1  -3   42.34    2.66 
   4  -1  -3   43.05    2.65 
  -4  -1   3   43.22    2.71 
  -4  -1   3   40.68    2.64 
  -4  -1   3   40.76    2.75 
   4  -1  -3   44.71    2.69 
   4  -1  -3   39.03    2.65 
  -4  -1   3   45.15    2.69 
  -4  -1   3   36.87    2.71 
  -4  -1   3   38.50    2.83 
   4  -1  -3   40.42    2.87 
  -4   1   3   36.26    2.65 
   4   1  -3   37.33    2.63 
  -4   1   3   41.29    2.66 
  -4   1   3   36.78    2.64 
  -4   1   3   44.68    2.74 
   4   1  -3   41.83    2.61 
  -4   1   3   41.06    2.83 
  -4   1   3   40.65    2.74 
   4   1  -3   46.64    2.64 
   4   1  -3   41.43    2.61 
   4   1  -3   42.40    2.65 
   4   1  -3   39.17    2.68 
   4   1  -3   42.39    2.69 
   3  -1  -3   22.78    1.44 
   3  -1  -3   22.90    1.45 
  -3  -1   3   23.56    1.54 
  -3  -1   3   20.70    1.56 
   3  -1  -3   21.97    1.49 
  -3  -1   3   22.19    1.44 
  -3  -1   3   35.53    7.04 
  -3  -1   3   24.43    1.51 
  -3  -1   3   23.26    1.56 
  -3  -1   3   23.62    1.53 
  -3  -1   3   20.90    1.52 
   3  -1  -3   26.12    1.96 
   3  -1  -3   28.60    6.17 
   3  -1  -3   20.37    1.45 
   3  -1  -3   23.04    1.47 
  -3  -1   3   22.43    2.07 
   3  -1  -3   20.57    1.58 
   3   1  -3   21.20    1.49 
  -3   1   3   20.73    1.46 
  -3   1   3   21.43    1.91 
   3   1  -3   22.87    1.51 
   3   1  -3   23.53    1.60 
  -3   1   3   22.74    1.55 
  -3   1   3   24.84    1.46 
   3   1  -3   19.44    6.84 
   3   1  -3   24.42    2.08 
  -3   1   3   25.07    1.60 
   3   1  -3   21.88    1.46 
   3   1  -3   21.55    1.53 
  -3   1   3   23.04    1.61 
   3   1  -3   22.96    1.49 
  -3   1   3   18.65    5.40 
  -2  -1   3   91.69    6.64 
  -2  -1   3  111.68    6.62 
   2  -1  -3  110.76    8.41 
  -2  -1   3  107.39    9.14 
  -2  -1   3   99.29    6.65 
   2  -1  -3  106.02    6.69 
   2  -1  -3   99.50    6.61 
   2  -1  -3  106.03    6.62 
   2  -1  -3  110.69    9.10 
   2  -1  -3  108.30    6.59 
  -2  -1   3  102.98    6.66 
   2  -1  -3  106.36    6.60 
  -2  -1   3  109.90    6.94 
  -2  -1   3  101.62    6.59 
  -2  -1   3  114.56    6.64 
   2   1  -3  114.66    6.96 
   2   1  -3   95.02    6.68 
   2   1  -3  109.36    6.69 
   2   1  -3  107.73    6.74 
   2   1  -3   99.07    6.65 
   2   1  -3   98.93    9.41 
  -2   1   3  122.57    6.87 
  -2   1   3   98.76    6.71 
  -2   1   3  116.93    6.66 
  -2   1   3   93.69    6.86 
  -1  -1   3   74.42    4.50 
   1  -1  -3   73.41    5.70 
  -1  -1   3   75.52    4.53 
  -1  -1   3   69.30    4.46 
  -1  -1   3   65.58    4.50 
   1  -1  -3   72.14    4.48 
  -1  -1   3   72.04    4.47 
   1  -1  -3   75.58    4.52 
   1  -1  -3   70.32    4.47 
  -1  -1   3   75.85    4.48 
  -1  -1   3   69.96    4.80 
   1  -1  -3   72.25    6.03 
   1  -1  -3   60.98    4.47 
  -1   1   3   79.67    4.75 
   1   1  -3   77.90    4.71 
  -1   1   3   77.89    4.70 
   1   1  -3   71.57    6.14 
   1   1  -3   64.51    4.71 
   1   1  -3   71.39    4.70 
   1   1  -3   78.45    4.75 
   1   1  -3   72.81    6.43 
  -1   1   3   76.08    4.85 
   0  -1  -3   77.70    4.60 
   0  -1   3   70.38    4.63 
   0  -1  -3   70.89    4.60 
   0  -1   3   71.30    4.61 
   0  -1  -3   74.30    4.61 
   0  -1   3   76.00    4.73 
   0  -1  -3   73.92    6.12 
   0  -1  -3   70.36    4.63 
   0  -1  -3   76.75    4.67 
   0  -1   3   72.30    4.60 
   0  -1   3   73.19    5.92 
   0  -1  -3   72.71    4.73 
   0   1   3   77.01    5.67 
   0   1  -3   75.77    4.29 
   0   1   3   68.68    4.29 
   0   1  -3   65.02    4.29 
   0   1   3   64.73    4.41 
   0   1  -3   69.59    4.28 
   0   1   3   67.75    4.31 
   0   1   3   61.77    4.28 
   0   1  -3   69.32    5.55 
   0   1  -3   67.30    4.41 
   1  -1   3   22.84    3.01 
  -1  -1  -3   20.54    1.35 
  -1  -1  -3   22.24    1.48 
   1  -1   3   22.14    1.39 
   1  -1   3   22.11    1.37 
  -1  -1  -3   21.31    1.40 
  -1  -1  -3   21.61    1.57 
   1  -1   3   20.56    1.43 
   1  -1   3   22.23    1.60 
  -1  -1  -3   25.83    3.63 
   1  -1   3   18.96    1.34 
  -1  -1  -3   21.59    1.37 
   1   1   3   19.42    1.32 
   1   1   3   20.40    1.28 
  -1   1  -3   20.54    1.31 
   1   1   3   20.85    1.31 
  -1   1  -3   20.66    1.46 
   1   1   3   29.98    3.48 
  -1   1  -3   21.24    1.30 
  -1   1  -3   18.78    1.35 
   1   1   3   20.60    1.55 
   1   1   3   20.01    1.36 
   1   1   3   18.50    1.27 
  -2  -1  -3   30.44    2.01 
   2  -1   3   31.08    2.01 
  -2  -1  -3   30.79    1.98 
   2  -1   3   30.99    2.35 
   2  -1   3   29.38    2.09 
  -2  -1  -3   33.33    2.18 
  -2  -1  -3   30.67    1.94 
   2  -1   3   31.24    1.98 
   2  -1   3   28.81    1.94 
  -2  -1  -3   33.60    6.60 
   2  -1   3   23.79    4.30 
   2   1   3   30.93    1.91 
   2   1   3   29.05    2.44 
   2   1   3   30.15    1.92 
  -2   1  -3   29.77    1.95 
   2   1   3   29.45    1.96 
   2   1   3   31.31    2.00 
  -2   1  -3   28.62    2.18 
   2   1   3   30.79    2.05 
   2   1   3   33.04    5.38 
   2   1   3   30.12    1.92 
  -2   1  -3   31.39    1.99 
  -3  -1  -3   21.64    1.49 
  -3  -1  -3   20.88    1.50 
  -3  -1  -3   24.50    1.45 
  -3  -1  -3   20.97    1.50 
  -3  -1  -3   23.22    1.49 
  -3  -1  -3   22.83    1.54 
  -3  -1  -3   20.74    1.73 
  -3  -1  -3   12.63   16.79 
   3  -1   3   24.04    1.52 
   3  -1   3   22.53    1.55 
   3  -1   3   23.29    1.44 
   3  -1   3   22.67    1.63 
  -3   1  -3   22.95    1.58 
  -3   1  -3   21.92    1.48 
   3   1   3   23.84    1.39 
  -3   1  -3   21.87    1.39 
  -3   1  -3   20.51    1.44 
  -3   1  -3   22.21    1.77 
   3   1   3   21.51    1.58 
   3   1   3   19.48    1.55 
   3   1   3   22.15    1.46 
   3   1   3   19.45    1.41 
  -4  -1  -3    8.63    0.61 
   4  -1   3    7.50    0.83 
  -4  -1  -3    7.53    0.67 
   4  -1   3    8.77    0.59 
   4  -1   3    7.56    0.87 
   4  -1   3    8.66    0.58 
   4  -1   3    8.55    0.58 
   4  -1   3    7.55    0.73 
   4  -1   3    8.91    0.67 
  -4  -1  -3    8.00    0.65 
  -4  -1  -3    8.90    0.78 
  -4  -1  -3    8.52    0.64 
  -4   1  -3    8.42    0.60 
   4   1   3    7.93    0.70 
  -4   1  -3    6.90    0.60 
   4   1   3    7.93    0.83 
  -4   1  -3    7.76    0.68 
   4   1   3    6.66    0.78 
  -4   1  -3    8.01    0.59 
  -4   1  -3    9.23    0.76 
   4   1   3    7.62    0.66 
  -4   1  -3    6.74    0.80 
   4   1   3    8.10    0.54 
   4   1   3    7.80    0.55 
   5  -1   3    6.69    0.46 
   5  -1   3    6.26    0.47 
  -5  -1  -3    6.45    0.52 
  -5  -1  -3    6.33    0.51 
   5  -1   3    6.39    0.47 
  -5   1  -3    4.92    0.58 
   5   1   3    5.57    0.41 
  -5   1  -3    6.57    0.46 
  -5   1  -3    6.35    0.46 
   5   1   3    5.54    0.41 
  -5   1  -3    5.70    0.46 
   5   1   3    5.72    0.42 
   6  -1   3    0.44    0.07 
  -6  -1  -3    0.65    0.14 
   6  -1   3    0.49    0.09 
  -6  -1  -3    0.57    0.10 
   6   1   3    0.46    0.08 
  -6   1  -3    0.61    0.09 
   6  -2  -3   22.10    1.34 
  -6  -2   3   21.36    1.40 
   6  -2  -3   19.14    1.34 
   6  -2  -3   20.04    1.34 
  -6   2   3   19.08    1.35 
  -6   2   3   17.24    1.37 
  -6   2   3   19.31    1.28 
  -6   2   3   17.80    1.26 
   6   2  -3   19.73    1.21 
   6   2  -3   19.66    1.32 
  -5  -2   3    3.18    0.25 
  -5  -2   3    3.12    0.36 
  -5  -2   3    3.25    0.37 
   5  -2  -3    3.46    0.29 
   5  -2  -3    2.97    0.30 
  -5  -2   3    2.91    0.31 
   5  -2  -3    3.10    0.27 
  -5   2   3    3.39    0.42 
  -5   2   3    3.00    0.28 
   5   2  -3    2.63    0.23 
  -5   2   3    3.32    0.35 
  -5   2   3    3.00    0.46 
   5   2  -3    2.96    0.34 
  -5   2   3    2.90    0.43 
  -5   2   3    2.78    0.34 
   5   2  -3    2.92    0.26 
  -5   2   3    3.05    0.32 
   5   2  -3    3.16    0.35 
   4  -2  -3   35.16    2.12 
   4  -2  -3   34.20    2.16 
  -4  -2   3   32.76    2.22 
  -4  -2   3   32.69    2.28 
  -4  -2   3   34.13    2.13 
  -4  -2   3   33.14    2.16 
   4  -2  -3   31.09    2.13 
   4  -2  -3   38.65    2.42 
   4  -2  -3   35.29    2.13 
  -4  -2   3   30.26    2.30 
  -4  -2   3   29.04    2.19 
   4  -2  -3   31.68    2.20 
  -4   2   3   34.92    2.33 
  -4   2   3   34.06    2.15 
  -4   2   3   33.12    2.24 
   4   2  -3   34.86    2.28 
   4   2  -3   30.60    2.06 
  -4   2   3   30.45    2.10 
   4   2  -3   34.42    2.17 
  -4   2   3   30.08    2.14 
   4   2  -3   27.74    2.14 
   4   2  -3   32.44    2.16 
  -4   2   3   34.35    2.21 
   4   2  -3   30.35    2.07 
   4   2  -3   34.58    2.08 
  -3  -2   3    6.55    0.45 
  -3  -2   3    3.63    1.10 
  -3  -2   3    6.51    0.52 
   3  -2  -3    6.40    0.60 
  -3  -2   3    6.48    0.55 
   3  -2  -3    6.36    0.52 
   3  -2  -3    5.86    0.45 
   3  -2  -3    6.61    0.44 
  -3  -2   3    5.80    0.52 
   3  -2  -3    6.50    0.46 
  -3  -2   3    6.56    0.49 
  -3  -2   3    5.59    7.20 
  -3  -2   3    6.69    0.45 
  -3  -2   3    5.71    0.54 
   3  -2  -3   20.42    6.04 
  -3  -2   3    6.68    0.55 
   3  -2  -3    6.92    0.45 
  -3   2   3    6.61    0.46 
  -3   2   3    7.03    0.63 
   3   2  -3    6.34    0.51 
   3   2  -3    8.17    1.39 
   3   2  -3    6.65    0.55 
   3   2  -3    9.45    7.56 
   3   2  -3    6.63    0.51 
  -3   2   3    6.85    0.94 
   3   2  -3    6.18    0.48 
   3   2  -3    7.04    0.58 
  -2  -2   3   -1.94    2.93 
   2  -2  -3    0.21    2.33 
  -2  -2   3    0.19    0.41 
  -2  -2   3    0.51    0.13 
   2  -2  -3    0.48    0.06 
  -2  -2   3    0.34    0.06 
   2  -2  -3    1.67    1.81 
  -2  -2   3    0.64    0.12 
  -2  -2   3    0.53    0.10 
   2  -2  -3    0.53    0.11 
   2  -2  -3    0.76    0.09 
   2  -2  -3    0.32    0.13 
  -2  -2   3    0.46    0.11 
   2  -2  -3    0.47    0.08 
  -2  -2   3    0.54    0.16 
   2   2  -3    0.74    0.14 
  -2   2   3    0.49    0.16 
   2   2  -3    0.64    0.15 
   2   2  -3    0.72    0.17 
   2   2  -3    0.37    0.06 
   2   2  -3    0.34    0.07 
   2   2  -3    1.11    3.09 
   2   2  -3    0.42    0.43 
  -2   2   3    0.66    0.29 
  -2   2   3    0.50    0.08 
   2   2  -3    0.48    0.10 
  -1  -2   3   11.96    0.87 
   1  -2  -3   11.48    2.10 
   1  -2  -3   13.03    0.87 
   1  -2  -3   11.79    0.80 
   1  -2  -3   13.17    2.37 
  -1  -2   3   14.34    1.11 
  -1  -2   3   12.74    0.85 
   1  -2  -3   13.56    0.81 
  -1  -2   3   12.01    0.88 
  -1  -2   3   12.46    0.81 
   1  -2  -3   12.82    0.83 
  -1  -2   3   12.36    0.83 
   1   2  -3   11.95    0.86 
   1   2  -3   12.21    0.86 
   1   2  -3   14.30    3.20 
   1   2  -3   11.96    0.83 
   1   2  -3   13.85    0.91 
  -1   2   3   12.63    0.85 
   1   2  -3   13.84    0.85 
  -1   2   3   13.78    0.93 
  -1   2   3   13.68    1.00 
   0  -2   3   25.98    1.87 
   0  -2  -3   28.42    1.85 
   0  -2   3   22.54    1.68 
   0  -2   3   25.48    1.71 
   0  -2  -3   23.74    1.68 
   0  -2  -3   26.96    1.71 
   0  -2   3   26.46    1.93 
   0  -2   3   29.16    1.70 
   0  -2   3   26.71    1.74 
   0  -2  -3   29.57    1.80 
   0  -2  -3   28.27    1.69 
   0   2   3   26.76    1.70 
   0   2  -3   27.29    1.66 
   0   2   3   26.95    3.14 
   0   2   3   25.38    1.67 
   0   2  -3   25.25    3.21 
   0   2  -3   26.03    1.66 
   0   2  -3   24.07    2.99 
   0   2  -3   26.12    1.68 
   0   2   3   26.00    1.85 
   1  -2   3    3.61    0.28 
   1  -2   3    3.11    0.23 
  -1  -2  -3    3.54    0.31 
  -1  -2  -3    4.00    0.57 
   1  -2   3    3.74    0.34 
  -1  -2  -3    3.87    0.40 
   1  -2   3    2.85    0.27 
  -1  -2  -3    3.28    2.88 
   1  -2   3    3.92    1.96 
   1  -2   3    3.42    0.49 
  -1  -2  -3    3.71    0.28 
   1   2   3    3.16    0.27 
  -1   2  -3    3.22    0.29 
   1   2   3    3.28    0.25 
   1   2   3    4.22    2.25 
   1   2   3    3.46    0.59 
   1   2   3    3.21    0.28 
   1   2   3    3.49    0.33 
   1   2   3    2.94    0.26 
  -2  -2  -3   69.54   10.26 
   2  -2   3   49.03    6.42 
  -2  -2  -3   54.14    3.52 
  -2  -2  -3   56.62    3.61 
   2  -2   3   52.96    3.51 
   2  -2   3   56.48    3.58 
  -2  -2  -3   54.57    3.96 
   2  -2   3   57.31    3.55 
  -2  -2  -3   52.23    3.55 
  -2  -2  -3   57.81    3.57 
  -2  -2  -3   59.38    3.54 
   2  -2   3   57.61    3.66 
   2  -2   3   52.83    3.52 
  -2  -2  -3   58.88    3.77 
   2  -2   3   55.81    3.87 
   2   2   3   48.61    3.13 
  -2   2  -3   48.99    3.16 
   2   2   3   59.80    8.10 
   2   2   3   52.79    3.81 
   2   2   3   54.93    3.30 
   2   2   3   48.49    3.17 
   2   2   3   42.68    3.25 
  -2   2  -3   50.02    3.28 
  -2   2  -3   44.01    7.23 
   2   2   3   48.08    3.14 
  -2   2  -3   48.26    3.38 
   2   2   3   55.49    3.22 
   3  -2   3    1.01    0.11 
   3  -2   3    0.57    0.22 
  -3  -2  -3    0.96    0.13 
   3  -2   3    1.04    0.19 
   3  -2   3    0.95    0.16 
  -3  -2  -3    0.97    0.18 
   3  -2   3    0.85    0.11 
  -3  -2  -3    0.52    0.15 
  -3  -2  -3    1.08    0.17 
  -3  -2  -3    0.79    0.13 
  -3  -2  -3    0.54    0.16 
  -3  -2  -3    0.61    0.15 
  -3  -2  -3    0.88    0.18 
   3   2   3    0.96    0.11 
   3   2   3    0.69    0.16 
  -3   2  -3    0.80    0.20 
  -3   2  -3    0.73    0.17 
   3   2   3    0.43    0.16 
  -3   2  -3    0.77    0.14 
  -3   2  -3    0.85    0.15 
   3   2   3    0.75    0.10 
   3   2   3    0.76    0.11 
   3   2   3    0.77    0.18 
   3   2   3    0.65    0.16 
  -3   2  -3    0.90    0.23 
  -3   2  -3    0.78    0.26 
   3   2   3    0.48    0.25 
  -4  -2  -3   13.59    1.10 
   4  -2   3   15.28    0.99 
  -4  -2  -3   14.68    0.98 
  -4  -2  -3   15.20    1.04 
   4  -2   3   14.43    1.06 
   4  -2   3   15.07    0.98 
   4  -2   3   16.33    0.98 
   4  -2   3   14.12    1.31 
  -4  -2  -3   14.57    1.05 
   4  -2   3   13.42    1.23 
  -4   2  -3   15.03    1.01 
  -4   2  -3   14.39    1.12 
   4   2   3   13.93    1.05 
  -4   2  -3   14.55    1.03 
  -4   2  -3   14.04    1.05 
  -4   2  -3   15.67    1.13 
  -4   2  -3   14.11    1.25 
  -4   2  -3   15.73    1.19 
   4   2   3   16.38    0.99 
  -5  -2  -3    5.26    0.48 
  -5  -2  -3    5.05    0.44 
   5  -2   3    4.92    0.37 
   5  -2   3    5.11    0.37 
   5  -2   3    4.94    0.38 
  -5   2  -3    5.07    0.37 
  -5   2  -3    4.96    0.46 
   5   2   3    4.97    0.36 
   5   2   3    4.66    0.43 
  -5   2  -3    4.56    0.53 
  -5   2  -3    4.80    0.42 
   6  -2   3    7.96    0.61 
   6  -2   3    9.41    0.62 
  -6  -2  -3   10.15    0.65 
  -6  -2  -3   10.24    0.65 
   6   2   3    7.81    0.46 
  -6   2  -3    6.28    0.50 
   6  -3  -3   21.83    1.55 
   6  -3  -3   25.04    1.57 
   6  -3  -3   26.12    1.56 
   6   3  -3   24.15    1.58 
  -6   3   3   25.99    1.67 
  -6   3   3   21.18    1.63 
   6   3  -3   20.72    1.49 
  -6   3   3   26.98    1.60 
  -6   3   3   23.44    1.55 
   5  -3  -3    3.15    0.27 
   5  -3  -3    2.77    0.32 
   5  -3  -3    3.74    0.35 
  -5  -3   3    3.36    0.34 
  -5  -3   3    2.87    0.40 
  -5  -3   3    3.71    0.31 
  -5  -3   3    2.95    0.37 
   5  -3  -3    3.70    0.29 
   5   3  -3    3.01    0.37 
   5   3  -3    2.82    0.36 
  -5   3   3    2.92    0.48 
  -5   3   3    3.68    0.41 
  -5   3   3    3.79    0.53 
  -5   3   3    2.58    0.33 
  -5   3   3    3.37    0.49 
   4  -3  -3    0.68    0.12 
  -4  -3   3    0.81    0.13 
  -4  -3   3    0.44    0.10 
  -4  -3   3    0.67    0.18 
   4  -3  -3    0.94    0.28 
  -4  -3   3    0.57    0.20 
   4  -3  -3    0.77    0.12 
  -4  -3   3    0.37    0.22 
  -4  -3   3    0.77    0.14 
  -4  -3   3    0.81    0.18 
  -4  -3   3    0.33    0.14 
  -4  -3   3    0.46    0.24 
   4  -3  -3    0.63    0.13 
  -4   3   3    0.82    0.19 
  -4   3   3    0.61    0.23 
   4   3  -3    0.50    0.13 
   4   3  -3    0.55    0.25 
  -4   3   3    0.79    0.20 
  -4   3   3    0.64    0.35 
   4   3  -3    0.91    0.13 
  -4   3   3    0.57    0.23 
  -4   3   3    0.41    0.20 
   3  -3  -3   80.39    5.14 
  -3  -3   3   80.44    5.17 
  -3  -3   3   76.35    5.29 
  -3  -3   3   89.32    5.29 
  -3  -3   3   83.73    5.20 
   3  -3  -3   81.93    5.15 
  -3  -3   3   79.53    5.23 
   3  -3  -3   72.51    5.32 
   3  -3  -3   89.62    5.17 
  -3  -3   3   81.72    5.27 
  -3  -3   3   84.17    5.17 
  -3   3   3   70.08    5.14 
  -3   3   3   86.34    5.36 
  -3   3   3   75.10    5.22 
  -3   3   3   81.86    5.21 
  -3   3   3   82.08    5.31 
   3   3  -3   72.45    5.25 
  -3   3   3   86.63    5.17 
   3   3  -3   89.39    5.28 
   3   3  -3   83.60    5.21 
   3   3  -3   80.05    5.14 
   3   3  -3   84.42    5.20 
   3   3  -3   89.45    5.31 
  -2  -3   3   15.97    1.20 
  -2  -3   3   19.09    1.17 
   2  -3  -3   19.25    1.16 
   2  -3  -3   17.59    1.18 
  -2  -3   3   23.68    6.26 
   2  -3  -3   17.50    1.14 
   2  -3  -3   19.47    1.28 
  -2  -3   3   18.12    1.16 
  -2  -3   3   17.63    1.23 
  -2  -3   3   14.41    1.75 
  -2  -3   3   17.10    1.19 
   2  -3  -3   19.10    2.57 
  -2  -3   3   18.98    1.28 
   2  -3  -3   15.18    2.70 
   2   3  -3   17.41    1.27 
   2   3  -3   17.36    1.23 
   2   3  -3   19.50    1.20 
  -2   3   3   18.17    1.20 
  -2   3   3   20.43    1.34 
  -2   3   3   16.09    1.27 
   2   3  -3   18.44    1.26 
   1  -3  -3    7.64    0.54 
   1  -3  -3    8.95    0.61 
   1  -3  -3    7.43    0.55 
   1  -3  -3    9.84    0.71 
  -1  -3   3    8.69    0.66 
   1  -3  -3    9.14    0.55 
  -1  -3   3    8.05    0.96 
   1  -3  -3    8.11    2.18 
  -1  -3   3    7.93    0.60 
  -1  -3   3    9.10    0.58 
  -1  -3   3    7.81    0.60 
   1  -3  -3    8.39    0.57 
  -1  -3   3    8.30    0.55 
   1  -3  -3    7.09    2.26 
  -1   3   3    8.11    0.57 
  -1   3   3    8.59    0.72 
   1   3  -3    6.97    0.58 
   1   3  -3    6.44    2.90 
  -1   3   3    8.84    0.66 
  -1   3   3    7.91    0.70 
   1   3  -3    7.64    0.62 
   1   3  -3    9.24    0.56 
   1   3  -3    6.36    3.12 
   0  -3  -3    3.58    0.30 
   0  -3   3    3.95    0.28 
   0  -3   3    3.67    0.53 
   0  -3   3    3.66    0.25 
   0  -3  -3    3.50    0.54 
   0  -3  -3    3.37    0.25 
   0  -3  -3    3.89    0.27 
   0  -3   3    3.06    0.48 
   0  -3   3    3.27    0.34 
   0  -3   3    3.70    0.30 
   0  -3  -3    3.70    2.62 
   0  -3  -3    3.87    0.42 
   0   3   3    3.29    0.27 
   0   3   3    3.58    0.54 
   0   3  -3    3.26    0.27 
   1  -3   3   10.14    0.68 
  -1  -3  -3    9.46    0.69 
   1  -3   3    8.64    0.88 
  -1  -3  -3    9.45    0.66 
  -1  -3  -3    8.79    1.05 
  -1  -3  -3    8.33    0.65 
  -1  -3  -3   10.09    0.82 
   1  -3   3    8.86    0.61 
   1  -3   3   10.31    0.64 
   1  -3   3    9.94    0.67 
  -1  -3  -3   17.15    4.91 
   1  -3   3   10.35    0.75 
  -1  -3  -3    9.31    0.63 
  -1   3  -3    9.76    3.49 
   1   3   3    9.43    0.64 
   1   3   3    9.20    0.63 
  -1   3  -3    6.44    2.79 
  -1   3  -3    9.12    0.68 
   1   3   3   12.10    3.75 
  -2  -3  -3   34.25    2.25 
   2  -3   3   36.66    2.24 
   2  -3   3   31.52    2.20 
   2  -3   3   36.56    2.32 
  -2  -3  -3   33.75    2.28 
  -2  -3  -3   36.92    2.27 
   2  -3   3   37.10    2.38 
  -2  -3  -3   35.37    2.22 
  -2  -3  -3   32.80    2.47 
  -2  -3  -3   35.72    2.23 
  -2  -3  -3   33.39    2.32 
   2  -3   3   34.72    2.21 
  -2   3  -3   28.13    2.10 
   2   3   3   30.39    2.10 
   2   3   3   33.12    2.07 
   2   3   3   35.16    3.22 
  -2   3  -3   34.92    2.19 
   2   3   3   34.05    2.14 
  -2   3  -3   32.85    2.19 
   2   3   3   31.72    2.12 
  -3  -3  -3   10.22    1.07 
  -3  -3  -3   11.62    0.84 
  -3  -3  -3   11.36    0.76 
   3  -3   3   11.21    0.73 
  -3  -3  -3   12.07    0.77 
   3  -3   3   11.59    0.80 
  -3  -3  -3   11.42    0.93 
  -3  -3  -3   11.27    0.80 
  -3  -3  -3   10.30    0.82 
  -3  -3  -3   11.56    0.76 
  -3  -3  -3    9.99    0.87 
   3  -3   3   11.60    0.74 
   3  -3   3   10.41    0.95 
  -3   3  -3   11.14    0.85 
  -3   3  -3   11.50    0.86 
  -3   3  -3    9.66    0.88 
   3   3   3   10.77    0.69 
   3   3   3   10.38    0.77 
  -3   3  -3   10.37    0.76 
  -3   3  -3   10.19    0.70 
   3   3   3    8.92    0.73 
  -4  -3  -3    1.29    0.23 
   4  -3   3    1.00    0.13 
  -4  -3  -3    0.71    0.22 
   4  -3   3    1.14    0.15 
  -4  -3  -3    1.23    0.25 
   4  -3   3    0.97    0.14 
   4  -3   3    1.01    0.18 
  -4  -3  -3    0.95    0.16 
   4   3   3    0.77    0.12 
   4   3   3    0.87    0.20 
  -4   3  -3    0.88    0.13 
  -4   3  -3    1.00    0.30 
   4   3   3    1.01    0.23 
  -4   3  -3    0.82    0.31 
  -4   3  -3    1.06    0.21 
  -4   3  -3    1.13    0.27 
  -5  -3  -3    1.43    0.25 
  -5  -3  -3    0.95    0.15 
  -5  -3  -3    1.01    0.20 
   5  -3   3    0.94    0.13 
   5  -3   3    1.47    0.18 
   5   3   3    1.03    0.11 
   5   3   3    1.05    0.20 
  -5   3  -3    1.21    0.22 
  -5   3  -3    1.16    0.20 
  -5   3  -3    0.78    0.19 
  -5   3  -3    0.97    0.27 
   6  -3   3    1.53    0.13 
   6  -3   3    1.36    0.12 
  -6  -3  -3    1.76    0.17 
   6  -4  -3    0.80    0.10 
  -6  -4   3    0.83    0.15 
   6  -4  -3    0.84    0.09 
   6   4  -3    1.00    0.18 
  -6   4   3    0.77    0.14 
  -6   4   3    0.80    0.19 
  -6   4   3    0.79    0.18 
  -6   4   3    0.88    0.14 
  -5  -4   3    1.11    0.19 
  -5  -4   3    0.83    0.15 
  -5  -4   3    1.03    0.21 
   5  -4  -3    0.98    0.13 
   5  -4  -3    1.07    0.14 
   5   4  -3    1.07    0.21 
  -5   4   3    0.72    0.19 
  -5   4   3    0.98    0.27 
  -5   4   3    1.00    0.21 
  -5   4   3    1.08    0.22 
  -5   4   3    0.82    0.25 
  -4  -4   3   48.00    2.87 
   4  -4  -3   42.18    2.83 
  -4  -4   3   45.06    2.93 
   4  -4  -3   43.45    2.85 
  -4  -4   3   44.77    2.98 
  -4  -4   3   38.16    2.85 
   4  -4  -3   47.17    2.84 
  -4  -4   3   45.88    2.90 
  -4  -4   3   46.49    2.85 
  -4   4   3   43.99    2.90 
  -4   4   3   44.04    2.95 
   4   4  -3   43.33    2.85 
  -4   4   3   39.85    2.82 
  -4   4   3   41.99    2.84 
   4   4  -3   41.94    2.83 
  -4   4   3   45.91    2.96 
   4   4  -3   42.93    2.80 
  -4   4   3   44.99    3.03 
   3  -4  -3   11.17    0.73 
  -3  -4   3    9.96    0.84 
  -3  -4   3   10.78    0.79 
  -3  -4   3   11.37    0.77 
  -3  -4   3   11.09    0.75 
   3  -4  -3   10.42    0.72 
  -3  -4   3   10.48    0.91 
   3  -4  -3   11.82    1.00 
  -3  -4   3   11.17    0.76 
   3   4  -3    9.25    0.77 
   3   4  -3   10.91    0.81 
   3   4  -3   11.08    0.74 
  -3   4   3   10.96    0.84 
  -3   4   3   10.50    0.87 
  -3   4   3   10.72    0.89 
  -3   4   3   10.29    0.80 
  -3   4   3   11.42    0.79 
  -3   4   3   11.36    0.75 
  -3   4   3   11.86    0.94 
  -3   4   3    9.45    0.76 
   3   4  -3    9.47    0.75 
   2  -4  -3   24.17    1.67 
  -2  -4   3   21.32    1.61 
  -2  -4   3   22.44    1.55 
  -2  -4   3   22.91    1.47 
  -2  -4   3   23.90    1.53 
   2  -4  -3   24.71    1.46 
   2  -4  -3   22.60    1.45 
  -2  -4   3   21.23    1.49 
   2  -4  -3   21.69    1.57 
   2   4  -3   25.00    1.61 
  -2   4   3   22.46    1.51 
   2   4  -3   21.78    1.54 
  -2   4   3   25.64    1.63 
   2   4  -3   20.39    1.53 
  -2   4   3   21.49    1.52 
  -2   4   3   25.65    1.67 
  -2   4   3   22.64    1.62 
   2   4  -3   24.31    1.48 
  -2   4   3   19.90    1.59 
  -2   4   3   23.42    1.76 
  -1  -4   3   23.20    1.67 
   1  -4  -3   26.53    1.80 
  -1  -4   3   27.47    1.64 
  -1  -4   3   26.00    2.17 
   1  -4  -3   27.24    1.61 
  -1  -4   3   24.82    1.74 
  -1  -4   3   25.08    1.61 
   1  -4  -3   23.69    1.59 
  -1  -4   3   22.56    1.65 
  -1  -4   3   25.91    1.62 
  -1   4   3   25.10    1.72 
   1   4  -3   20.98    1.61 
  -1   4   3   24.71    1.61 
   1   4  -3   27.47    1.69 
   1   4  -3   23.87    5.52 
   0  -4  -3    2.33    0.35 
   0  -4  -3    2.03    0.19 
   0  -4   3    2.19    0.19 
   0  -4  -3    2.21    0.19 
   0  -4   3    2.15    0.16 
   0  -4  -3    1.77    0.24 
   0  -4   3    2.39    0.57 
   0  -4   3    1.76    0.25 
   0  -4   3    1.90    0.22 
   0  -4  -3    1.92    0.16 
   0  -4   3    2.15    0.23 
   0   4  -3    0.86    3.09 
   0   4   3    1.98    0.20 
   0   4   3    1.68    0.91 
   0   4  -3    2.01    0.21 
  -1  -4  -3   17.58    1.10 
  -1  -4  -3   15.69    1.14 
  -1  -4  -3   15.86    1.06 
   1  -4   3   17.74    1.14 
  -1  -4  -3   16.52    1.30 
  -1  -4  -3   16.18    1.68 
  -1  -4  -3   16.84    1.07 
   1  -4   3   17.66    1.07 
   1  -4   3   15.00    1.04 
  -1  -4  -3   14.27    1.08 
   1  -4   3   16.95    1.21 
  -1   4  -3   16.43    1.07 
  -1   4  -3   16.01    1.08 
   1   4   3   14.12    1.04 
   1   4   3   14.16    1.02 
  -1   4  -3   14.29    1.04 
  -1   4  -3   17.54    1.15 
   1   4   3   15.42    1.04 
  -2  -4  -3    1.25    0.19 
  -2  -4  -3    0.93    0.14 
  -2  -4  -3    0.97    0.14 
  -2  -4  -3    0.99    0.14 
   2  -4   3    0.96    0.14 
   2  -4   3    0.96    0.09 
  -2  -4  -3    1.16    0.18 
  -2  -4  -3    0.83    0.19 
   2  -4   3    0.74    0.23 
   2   4   3    0.84    0.13 
  -2   4  -3    0.95    0.22 
   2   4   3    0.81    0.17 
  -2   4  -3    0.99    0.22 
  -2   4  -3    0.83    0.17 
  -2   4  -3    0.77    0.17 
   2   4   3    0.95    0.17 
   2   4   3    0.61    0.14 
  -2   4  -3    1.08    0.20 
  -2   4  -3    0.87    0.20 
   2   4   3    0.65    0.12 
   2   4   3    1.09    0.23 
  -2   4  -3    0.88    0.16 
   3  -4   3    0.89    0.11 
   3  -4   3    0.30    0.30 
   3  -4   3    0.87    0.16 
   3  -4   3    0.89    0.11 
  -3  -4  -3    1.41    0.50 
  -3  -4  -3    0.69    0.22 
  -3  -4  -3    1.58    0.33 
  -3  -4  -3    0.41    0.15 
  -3  -4  -3    1.08    0.18 
  -3  -4  -3    1.04    0.16 
  -3  -4  -3    0.70    0.12 
  -3  -4  -3    1.12    0.20 
   3   4   3    0.88    0.17 
  -3   4  -3    0.73    0.15 
   3   4   3    0.78    0.17 
  -3   4  -3    0.81    0.26 
   3   4   3    1.04    0.20 
  -3   4  -3    0.85    0.28 
  -3   4  -3    0.94    0.26 
  -3   4  -3    0.94    0.20 
   3   4   3    0.73    0.15 
  -3   4  -3    1.41    0.27 
  -4  -4  -3   17.58    1.15 
  -4  -4  -3   15.59    1.11 
  -4  -4  -3   18.54    1.18 
  -4  -4  -3   15.12    1.17 
  -4  -4  -3   16.03    1.28 
   4  -4   3   15.94    1.10 
   4  -4   3   17.88    1.17 
   4  -4   3   18.60    1.11 
  -4   4  -3   15.79    1.19 
   4   4   3   13.79    1.08 
  -4   4  -3   18.01    1.22 
  -4   4  -3   15.93    1.41 
   4   4   3   15.19    1.12 
  -4   4  -3   14.04    1.11 
  -5  -4  -3    1.00    0.18 
   5  -4   3    0.97    0.11 
  -5  -4  -3    0.89    0.11 
  -5  -4  -3    1.04    0.18 
   5  -4   3    0.97    0.11 
   5  -4   3    0.72    0.11 
  -5   4  -3    0.90    0.20 
   5   4   3    0.91    0.18 
  -5   4  -3    0.61    0.15 
   6   5  -3   14.73    0.86 
  -6   5   3   13.07    0.90 
  -6   5   3   11.90    0.90 
  -6   5   3   12.76    0.86 
   5  -5  -3    9.01    0.60 
  -5  -5   3    9.35    0.66 
  -5  -5   3    8.99    0.63 
  -5   5   3    8.31    0.71 
  -5   5   3    9.20    0.65 
   5   5  -3    8.34    0.64 
  -5   5   3    9.36    0.74 
  -5   5   3    8.01    0.63 
   4  -5  -3    9.93    0.71 
  -4  -5   3   11.54    0.80 
   4  -5  -3   10.41    0.70 
  -4  -5   3    9.69    0.85 
  -4  -5   3    9.65    0.87 
  -4  -5   3   10.34    0.81 
   4  -5  -3   10.92    0.71 
  -4  -5   3   11.36    0.74 
  -4   5   3   11.70    0.94 
  -4   5   3   11.65    0.94 
   4   5  -3   11.92    0.95 
  -4   5   3    8.56    0.81 
  -3  -5   3   15.47    1.08 
   3  -5  -3   15.67    1.03 
  -3  -5   3   16.06    1.08 
  -3  -5   3   15.91    1.09 
   3  -5  -3   17.88    1.58 
  -3  -5   3   15.59    1.29 
  -3  -5   3   16.35    1.15 
  -3   5   3   15.58    1.04 
   3   5  -3   13.04    0.99 
  -3   5   3   13.69    1.04 
   3   5  -3   15.00    1.06 
  -3   5   3   15.44    1.10 
  -3   5   3   14.33    1.11 
  -3   5   3   14.57    1.14 
  -3   5   3   14.63    1.18 
   3   5  -3   13.16    1.01 
  -3   5   3   13.78    1.01 
  -3   5   3   14.75    1.02 
   2  -5  -3    3.79    0.26 
  -2  -5   3    3.71    0.30 
   2  -5  -3    3.28    0.25 
   2  -5  -3    3.93    0.52 
  -2  -5   3    3.84    0.47 
  -2  -5   3    3.77    0.29 
  -2  -5   3    3.04    0.38 
  -2  -5   3    3.64    0.33 
  -2  -5   3    3.47    0.30 
  -2   5   3    3.32    0.33 
  -2   5   3    3.37    0.30 
  -2   5   3    3.77    0.40 
   2   5  -3    3.38    0.36 
  -2   5   3    3.94    0.41 
  -2   5   3    3.89    0.46 
  -2   5   3    3.70    0.45 
  -2   5   3    3.40    0.32 
   2   5  -3    3.25    0.31 
  -2   5   3    3.60    0.36 
   2   5  -3    3.17    0.32 
  -2   5   3    3.38    0.36 
   2   5  -3    3.41    0.34 
   1  -5  -3   22.81    1.58 
  -1  -5   3   21.79    1.68 
   1  -5  -3   27.62    1.61 
  -1  -5   3   24.15    1.64 
  -1  -5   3   23.32    1.61 
  -1  -5   3   26.31    1.96 
   1  -5  -3   27.10    1.86 
  -1  -5   3   26.98    1.62 
   1   5  -3   21.50    1.48 
   1   5  -3   22.67    1.51 
  -1   5   3   25.26    1.52 
  -1   5   3   24.03    1.57 
   1   5  -3   19.66    1.46 
  -1   5   3   20.92    1.48 
  -1   5   3   22.56    1.50 
  -1   5   3   22.46    1.61 
  -1   5   3   22.41    1.51 
  -1   5   3   22.88    1.50 
   1   5  -3   22.12    1.51 
   0  -5  -3    6.89    0.47 
   0  -5   3    6.76    0.54 
   0  -5   3    7.07    0.47 
   0  -5  -3    5.85    0.50 
   0  -5  -3    7.10    0.71 
   0  -5   3    6.21    0.60 
   0  -5   3    7.04    0.48 
   0  -5   3    7.76    0.50 
   0  -5  -3    8.19    0.51 
   0  -5  -3    6.91    0.48 
   0   5  -3    6.96    0.55 
   0   5  -3    7.17    0.54 
   0   5  -3    6.60    0.62 
   0   5   3    7.11    0.55 
   0   5   3    7.80    0.55 
   0   5   3    6.33    0.53 
   0   5   3    6.33    0.47 
   0   5   3    6.90    0.52 
   0   5  -3    6.29    0.52 
   0   5   3    6.29    0.52 
   0   5   3    7.60    0.58 
  -1  -5  -3   18.96    1.50 
   1  -5   3   17.99    1.28 
  -1  -5  -3   16.86    1.29 
  -1  -5  -3   18.00    1.23 
  -1  -5  -3   16.08    1.20 
   1  -5   3   19.17    1.37 
   1  -5   3   20.33    1.19 
  -1  -5  -3   17.78    1.20 
   1  -5   3   18.01    1.15 
  -1  -5  -3   17.83    1.18 
  -1  -5  -3   18.32    1.19 
   1   5   3   18.33    1.22 
  -1   5  -3   18.20    1.20 
   1   5   3   17.17    1.14 
  -1   5  -3   15.80    1.16 
  -1   5  -3   14.71    1.24 
  -1   5  -3   14.75    1.16 
   1   5   3   19.31    1.22 
  -1   5  -3   19.60    1.29 
  -1   5  -3   16.86    1.18 
   1   5   3   17.01    1.17 
   1   5   3   16.53    1.18 
   1   5   3   17.09    1.16 
  -2  -5  -3   10.02    0.83 
   2  -5   3   10.33    0.91 
  -2  -5  -3    9.35    0.89 
   2  -5   3    9.47    0.69 
  -2  -5  -3   10.41    0.76 
   2  -5   3    9.33    0.64 
  -2  -5  -3   10.79    0.71 
  -2  -5  -3   10.55    0.70 
  -2  -5  -3    9.89    0.73 
  -2  -5  -3    9.23    1.02 
  -2  -5  -3    9.84    0.68 
  -2   5  -3    9.45    0.71 
  -2   5  -3   10.23    0.74 
   2   5   3    9.30    0.68 
  -2   5  -3    9.31    0.71 
  -2   5  -3    8.60    0.78 
   2   5   3   10.13    0.81 
   2   5   3    8.93    0.70 
  -2   5  -3    8.54    0.75 
  -2   5  -3   10.74    0.83 
   2   5   3    9.87    0.70 
   2   5   3    9.37    0.70 
  -2   5  -3    9.11    0.70 
  -3  -5  -3    1.14    0.18 
  -3  -5  -3    0.95    0.21 
   3  -5   3    1.03    0.11 
   3  -5   3    0.87    0.14 
  -3  -5  -3    0.63    0.15 
  -3  -5  -3    1.26    0.30 
  -3  -5  -3    0.82    0.21 
  -3  -5  -3    0.98    0.16 
  -3   5  -3    0.89    0.47 
  -3   5  -3    0.99    0.28 
  -3   5  -3    0.95    0.21 
   3   5   3    1.11    0.23 
  -3   5  -3    1.29    0.19 
   3   5   3    0.96    0.19 
  -3   5  -3    0.94    0.25 
  -3   5  -3    0.97    0.23 
   3   5   3    1.27    0.23 
  -4  -5  -3    5.26    0.47 
  -4  -5  -3    6.37    0.49 
   4  -5   3    6.30    0.43 
  -4  -5  -3    6.24    0.45 
  -4  -5  -3    6.03    0.44 
   4   5   3    5.76    0.47 
  -4   5  -3    5.98    0.55 
  -4   5  -3    6.22    0.57 
  -4   5  -3    5.22    0.48 
  -4   5  -3    5.83    0.48 
  -5  -5  -3    0.82    0.09 
  -5  -5  -3    1.01    0.14 
   5  -5   3    0.78    0.11 
  -5   5  -3    0.69    0.14 
  -5   5  -3    1.05    0.15 
  -5   5  -3    0.69    0.17 
   5   5   3    0.94    0.15 
  -5  -6   3    2.65    0.22 
  -5  -6   3    2.95    0.25 
  -5   6   3    2.26    0.23 
   5   6  -3    2.77    0.24 
  -5   6   3    2.87    0.26 
  -5   6   3    2.68    0.28 
  -4  -6   3    0.32    0.10 
  -4  -6   3    0.18    0.10 
   4  -6  -3    0.45    0.07 
  -4  -6   3    0.27    0.10 
  -4  -6   3    0.36    0.16 
  -4   6   3    0.19    0.16 
   4   6  -3    0.19    0.14 
  -4   6   3    0.33    0.14 
  -4   6   3    0.31    0.17 
  -4   6   3    0.35    0.15 
  -4   6   3    0.38    0.17 
   4   6  -3    0.27    0.12 
  -3  -6   3   11.09    0.83 
   3  -6  -3    8.95    0.63 
  -3  -6   3   10.46    0.71 
  -3  -6   3    9.24    0.69 
  -3   6   3    7.63    0.78 
  -3   6   3    7.46    0.70 
   3   6  -3    7.15    0.54 
   3   6  -3    7.93    0.62 
  -3   6   3    6.11    0.58 
  -3   6   3    8.53    0.75 
  -3   6   3    8.09    0.79 
  -3   6   3    6.85    0.62 
  -3   6   3    7.27    0.67 
  -2  -6   3    1.91    0.21 
  -2  -6   3    2.00    0.20 
   2  -6  -3    1.88    0.16 
  -2  -6   3    1.99    0.24 
  -2  -6   3    1.99    0.22 
  -2   6   3    2.14    0.36 
   2   6  -3    1.87    0.30 
  -2   6   3    1.93    0.29 
  -2   6   3    2.25    0.28 
   2   6  -3    2.15    0.26 
   2   6  -3    1.86    0.24 
  -2   6   3    2.36    0.33 
  -2   6   3    2.13    0.29 
   2   6  -3    1.82    0.23 
  -2   6   3    1.96    0.26 
  -2   6   3    1.90    0.25 
  -2   6   3    1.93    0.23 
   1  -6  -3    1.33    0.30 
  -1  -6   3    1.10    0.14 
  -1  -6   3    1.30    0.48 
  -1  -6   3    1.16    0.15 
  -1  -6   3    0.97    0.23 
   1  -6  -3    1.12    0.12 
   1  -6  -3    0.96    0.13 
  -1   6   3    0.86    0.18 
  -1   6   3    1.29    0.28 
  -1   6   3    0.93    0.19 
  -1   6   3    1.06    0.24 
  -1   6   3    0.96    0.21 
   1   6  -3    0.64    0.26 
   1   6  -3    0.95    0.20 
   1   6  -3    0.85    0.13 
  -1   6   3    0.97    0.28 
  -1   6   3    0.76    0.25 
   1   6  -3    0.93    0.21 
  -1   6   3    1.05    0.24 
   1   6  -3    1.00    0.20 
   0  -6   3    3.59    0.49 
   0  -6  -3    3.61    0.32 
   0  -6   3    3.81    0.31 
   0  -6  -3    3.79    0.28 
   0  -6  -3    3.67    0.29 
   0  -6  -3    2.83    0.59 
   0  -6   3    3.76    0.29 
   0  -6   3    3.84    0.28 
   0  -6  -3    4.12    0.53 
   0   6   3    3.67    0.35 
   0   6  -3    3.33    0.35 
   0   6  -3    2.88    0.43 
   0   6  -3    2.90    0.33 
   0   6   3    3.82    0.36 
   0   6  -3    3.59    0.36 
   0   6   3    3.92    0.36 
   0   6   3    2.84    0.32 
   0   6   3    3.31    0.42 
   0   6   3    3.61    0.39 
   0   6   3    3.63    0.35 
   0   6  -3    3.64    0.38 
  -1  -6  -3    9.10    0.63 
  -1  -6  -3    7.19    1.00 
  -1  -6  -3    8.09    0.72 
  -1  -6  -3    8.65    0.66 
  -1  -6  -3    9.77    0.65 
   1  -6   3    9.22    0.84 
  -1  -6  -3    9.30    0.62 
  -1  -6  -3    8.54    0.86 
   1  -6   3    9.17    0.59 
  -1   6  -3    8.91    0.67 
   1   6   3    8.62    0.65 
  -1   6  -3    8.07    0.67 
  -1   6  -3    7.87    0.64 
   1   6   3    9.13    0.69 
   1   6   3    8.04    0.59 
   1   6   3    7.86    0.64 
   1   6   3    8.45    0.70 
  -1   6  -3    8.66    0.66 
  -1   6  -3    8.72    0.76 
   1   6   3    8.30    0.65 
  -2  -6  -3    4.46    0.45 
   2  -6   3    5.54    0.50 
   2  -6   3    4.66    0.38 
  -2  -6  -3    5.99    0.42 
  -2  -6  -3    5.27    0.41 
  -2  -6  -3    4.87    0.43 
   2   6   3    4.96    0.47 
   2   6   3    5.22    0.45 
  -2   6  -3    4.72    0.43 
  -2   6  -3    5.70    0.56 
   2   6   3    4.40    0.45 
  -2   6  -3    5.53    0.47 
   2   6   3    4.99    0.43 
  -2   6  -3    4.91    0.44 
   2   6   3    5.13    0.41 
   2   6   3    5.03    0.49 
  -2   6  -3    4.88    0.43 
  -3  -6  -3   20.68    1.34 
  -3  -6  -3   19.63    1.35 
  -3  -6  -3   21.08    1.35 
  -3   6  -3   17.15    1.21 
   3   6   3   16.79    1.17 
   3   6   3   18.08    1.17 
  -3   6  -3   16.92    1.16 
  -3   6  -3   18.42    1.20 
  -3   6  -3   18.73    1.31 
   3   6   3   15.43    1.20 
   4  -6   3   -0.09    0.07 
  -4  -6  -3    0.12    0.08 
  -4  -6  -3    0.04    0.06 
  -4  -6  -3   -0.05    0.08 
  -4   6  -3    0.02    0.09 
  -4   6  -3    0.05    0.13 
   4   6   3    0.10    0.09 
  -4   6  -3    0.06    0.13 
  -4  -7   3    4.81    0.36 
  -4  -7   3    3.58    0.31 
  -4  -7   3    4.00    0.30 
  -4   7   3    3.19    0.30 
  -4   7   3    3.92    0.37 
  -4   7   3    3.64    0.35 
  -4   7   3    4.47    0.33 
   4   7  -3    3.08    0.32 
   4   7  -3    4.03    0.28 
  -3  -7   3    8.28    0.61 
  -3  -7   3    7.43    0.55 
   3   7  -3    5.37    0.45 
  -3   7   3    5.23    0.55 
   3   7  -3    5.35    0.52 
   3   7  -3    7.01    0.45 
  -3   7   3    6.50    0.50 
  -3   7   3    7.16    0.50 
  -3   7   3    6.31    0.56 
   3   7  -3    6.52    0.53 
   3   7  -3    5.93    0.48 
  -2  -7   3   10.44    0.70 
  -2  -7   3    9.85    0.70 
  -2  -7   3    9.87    0.70 
  -2   7   3    9.16    0.66 
  -2   7   3    7.63    0.72 
   2   7  -3    8.71    0.72 
   2   7  -3    9.12    0.66 
  -2   7   3    9.51    0.69 
  -2   7   3    9.04    0.77 
   2   7  -3    8.44    0.68 
  -2   7   3    9.07    0.64 
   2   7  -3    9.07    0.71 
   2   7  -3    9.16    0.60 
  -2   7   3    9.45    0.70 
  -1  -7   3    3.59    0.28 
   1  -7  -3    3.66    0.25 
  -1  -7   3    3.06    0.27 
  -1  -7   3    2.80    0.36 
   1  -7  -3    2.87    0.29 
  -1   7   3    2.91    0.30 
  -1   7   3    3.38    0.49 
  -1   7   3    3.26    0.32 
   1   7  -3    2.92    0.39 
   1   7  -3    2.12    0.36 
  -1   7   3    2.75    0.38 
   0  -7   3   16.03    1.06 
   0  -7  -3   15.46    1.10 
   0  -7  -3   16.02    1.06 
   0   7   3   13.67    1.01 
   0   7  -3   13.34    1.12 
   0   7   3   14.11    1.03 
   0   7  -3   15.84    1.04 
   0   7  -3   13.15    0.98 
   0   7  -3   14.58    1.02 
   0   7   3   11.56    1.02 
   0   7   3   13.67    1.07 
   1  -7   3    8.62    0.60 
  -1  -7  -3    8.30    0.69 
  -1  -7  -3    8.78    0.63 
  -1  -7  -3    9.78    0.62 
  -1  -7  -3    9.31    0.64 
  -1   7  -3    7.95    0.62 
   1   7   3    8.45    0.66 
  -1   7  -3    7.50    0.64 
   1   7   3    8.66    0.64 
   1   7   3   10.03    0.77 
  -1   7  -3    8.55    0.65 
  -1   7  -3    7.57    0.71 
   1   7   3    7.78    0.67 
   1   7   3    6.99    0.66 
   1   7   3    8.26    0.64 
   1   7   3    8.45    0.63 
  -1   7  -3    9.08    0.65 
  -2  -7  -3    0.20    0.10 
  -2  -7  -3    0.07    0.09 
  -2  -7  -3    0.25    0.09 
  -2  -7  -3    0.30    0.10 
   2   7   3    0.22    0.12 
  -2   7  -3    0.34    0.13 
  -2   7  -3    0.22    0.11 
   2   7   3    0.18    0.07 
  -2   7  -3    0.36    0.15 
   2   7   3    0.16    0.14 
  -2   7  -3    0.22    0.16 
  -2   7  -3    0.19    0.11 
   2   7   3    0.24    0.16 
   2   7   3    0.16    0.09 
   2   7   3    0.24    0.16 
  -3  -7  -3    6.06    0.43 
  -3  -7  -3    6.08    0.42 
  -3  -7  -3    5.80    0.41 
  -3  -7  -3    5.14    0.46 
   3   7   3    4.92    0.40 
  -3   7  -3    5.72    0.38 
  -3   7  -3    5.35    0.51 
  -3   7  -3    4.96    0.41 
   3   7   3    4.47    0.40 
   3   7   3    5.71    0.38 
  -3   7  -3    4.15    0.44 
  -4  -7  -3    1.63    0.15 
  -4   7  -3    1.37    0.20 
  -4   7  -3    1.25    0.12 
  -4   7  -3    1.43    0.14 
   4   7   3    1.16    0.14 
  -3  -8   3    0.15    0.06 
  -3  -8   3    0.10    0.08 
  -3  -8   3    0.08    0.06 
   3   8  -3    0.01    0.07 
  -3   8   3    0.09    0.09 
   3   8  -3   -0.02    0.05 
  -3   8   3    0.05    0.11 
  -3   8   3    0.06    0.10 
   3   8  -3    0.07    0.09 
  -2  -8   3   10.98    0.74 
  -2  -8   3   10.56    0.73 
  -2  -8   3   11.16    0.73 
  -2   8   3    7.90    0.60 
   2   8  -3    6.74    0.62 
  -2   8   3    8.70    0.65 
  -2   8   3    9.00    0.61 
   2   8  -3    8.86    0.61 
   2   8  -3    7.64    0.65 
  -1  -8   3    0.84    0.11 
  -1  -8   3    0.56    0.10 
   1   8  -3    0.39    0.12 
   1   8  -3    0.74    0.19 
  -1   8   3    0.46    0.14 
  -1   8   3    0.68    0.19 
  -1   8   3    0.65    0.14 
  -1   8   3    0.74    0.16 
  -1   8   3    0.62    0.18 
  -1   8   3    0.36    0.13 
   1   8  -3    0.85    0.15 
   0  -8  -3    5.13    0.37 
   0  -8   3    5.13    0.41 
   0  -8  -3    5.60    0.38 
   0  -8   3    4.95    0.37 
   0   8  -3    4.89    0.39 
   0   8  -3    4.22    0.40 
   0   8   3    5.12    0.39 
   0   8  -3    4.40    0.45 
   0   8   3    4.33    0.43 
   0   8   3    3.77    0.43 
   0   8   3    5.05    0.45 
   0   8   3    5.44    0.42 
   0   8  -3    4.30    0.40 
  -1  -8  -3    4.28    0.32 
  -1  -8  -3    3.81    0.32 
  -1  -8  -3    4.72    0.33 
   1   8   3    2.83    0.27 
  -1   8  -3    2.31    0.29 
   1   8   3    2.41    0.29 
   1   8   3    2.63    0.27 
  -1   8  -3    2.11    0.26 
  -2  -8  -3    5.40    0.38 
  -2  -8  -3    4.87    0.37 
  -2  -8  -3    5.45    0.39 
   2   8   3    3.77    0.33 
  -2   8  -3    3.33    0.27 
  -2   8  -3    3.21    0.34 
   2   8   3    3.89    0.30 
  -3  -8  -3    0.13    0.05 
   3   8   3    0.09    0.07 
  -3   8  -3    0.05    0.08 
  -3   8  -3    0.15    0.07 
   2   9  -3    1.27    0.14 
   2   9  -3    1.22    0.12 
   2   9  -3    0.91    0.13 
  -1   9   3    7.36    0.54 
  -1   9   3    7.47    0.49 
   1   9  -3    7.27    0.52 
  -1   9   3    7.44    0.51 
   0   9  -3    4.59    0.39 
   0   9   3    4.85    0.38 
   0   9  -3    5.93    0.39 
   0   9   3    4.36    0.40 
   0   9   3    5.60    0.37 
   1   9   3    0.06    0.07 
   1   9   3    0.05    0.07 
   1   9   3    0.06    0.06 
  -1   9  -3    0.03    0.03 
  -1   9  -3    0.03    0.07 
  -1   9  -3    0.06    0.06 
   1   9   3   -0.02    0.05 
   7   0  -4    0.65    0.07 
   6   0  -4   25.62    1.78 
  -6   0   4   28.92    1.83 
   6   0  -4   26.76    1.77 
  -6   0   4   26.11    1.89 
   6   0  -4   31.09    1.81 
   5   0  -4   56.71    3.65 
   5   0  -4   55.70    3.54 
   5   0  -4   55.60    3.55 
  -5   0   4   55.21    3.79 
   5   0  -4   56.98    3.55 
  -5   0   4   55.31    3.61 
  -5   0   4   52.40    3.60 
   5   0  -4   58.13    3.61 
  -4   0   4   21.29    1.58 
   4   0  -4   23.71    1.61 
  -4   0   4   25.76    1.67 
  -4   0   4   19.94    1.56 
   4   0  -4   23.63    1.53 
   4   0  -4   20.40    1.54 
  -4   0   4   23.79    1.66 
  -4   0   4   26.38    1.72 
  -4   0   4   21.44    1.62 
  -4   0   4   24.36    1.59 
   4   0  -4   23.59    1.54 
  -4   0   4   23.34    1.71 
   4   0  -4   24.85    1.75 
   4   0  -4   24.70    1.64 
   4   0  -4   25.49    1.57 
  -4   0   4   25.13    1.56 
   3   0  -4   68.61   10.75 
   3   0  -4   68.27    4.13 
  -3   0   4   58.83    4.05 
  -3   0   4   60.41    4.08 
  -3   0   4   69.11    4.01 
  -3   0   4   65.68    4.10 
   3   0  -4   61.63    4.04 
  -3   0   4   60.09    4.57 
   3   0  -4   63.64    3.97 
   3   0  -4   60.10    4.01 
   3   0  -4   62.32    3.98 
   3   0  -4   60.86    3.96 
   3   0  -4   61.11    4.05 
   2   0  -4  216.64   15.24 
  -2   0   4  196.78   12.99 
   2   0  -4  189.49   12.66 
   2   0  -4  199.33   17.10 
   2   0  -4  217.57   12.76 
  -2   0   4  201.97   12.90 
  -2   0   4  208.78   12.77 
   2   0  -4  184.22   12.68 
  -2   0   4  205.49   12.67 
  -2   0   4  206.08   12.73 
  -1   0   4   50.16    3.08 
  -1   0   4   49.28    3.24 
  -1   0   4   40.69    3.08 
   1   0  -4   46.38    3.05 
  -1   0   4   50.33    3.07 
   1   0  -4   44.26    3.07 
  -1   0   4   50.34    3.11 
   1   0  -4   49.38    5.07 
   1   0  -4   48.28    3.05 
   1   0  -4   47.75    4.90 
  -1   0   4   52.98    3.32 
  -1   0   4   47.97    3.06 
   1   0  -4   50.68    3.12 
  -1   0   4   50.85    3.08 
   0   0   4   53.58    7.14 
   0   0   4   53.20    3.44 
   0   0   4   57.24    3.61 
   0   0   4   50.86    3.45 
   0   0  -4   51.58    3.43 
   0   0  -4   55.44    3.41 
   0   0  -4   55.29    5.19 
   0   0  -4   55.90    3.61 
   0   0   4   52.62    3.40 
   0   0  -4   57.58    3.48 
   0   0  -4   59.16    3.43 
   0   0   4   51.69    3.42 
   0   0  -4   51.05    3.40 
   1   0   4    3.98    0.62 
   1   0   4    4.09    0.27 
  -1   0  -4    3.85    0.30 
  -1   0  -4    3.84    0.40 
   1   0   4    4.09    0.38 
   1   0   4    4.21    0.37 
  -1   0  -4    4.13    0.33 
  -1   0  -4    3.67    0.30 
  -1   0  -4    2.96    2.80 
   1   0   4    4.01    0.31 
  -1   0  -4    3.01    0.50 
   1   0   4    0.39    1.98 
  -2   0  -4   30.41    2.36 
   2   0   4   31.19    2.06 
  -2   0  -4   25.36    6.97 
   2   0   4   31.88    1.98 
   2   0   4   29.59    1.97 
   2   0   4   31.78    2.59 
  -2   0  -4   29.92    2.00 
   2   0   4   31.05    1.97 
  -2   0  -4   31.95    2.02 
  -2   0  -4   29.66    2.17 
   2   0   4   24.05    8.99 
   2   0   4   32.47    2.13 
  -2   0  -4   32.79    2.05 
   2   0   4   31.44    2.03 
  -3   0  -4   19.31    1.28 
   3   0   4   18.01    1.31 
   3   0   4   19.83    1.24 
  -3   0  -4   18.24    1.31 
   3   0   4   19.16    1.23 
  -3   0  -4   20.36    1.41 
   3   0   4   19.50    1.24 
  -3   0  -4   18.51    1.28 
   3   0   4   18.43    1.36 
  -4   0  -4    3.81    0.51 
   4   0   4    5.21    0.37 
  -4   0  -4    3.92    0.40 
  -4   0  -4    5.25    0.43 
   4   0   4    4.89    0.37 
   4   0   4    4.27    0.64 
  -4   0  -4    5.71    0.58 
   4   0   4    4.15    0.52 
  -4   0  -4    5.15    0.43 
  -4   0  -4    4.61    0.62 
   4   0   4    4.72    0.48 
   4   0   4    4.70    0.67 
   4   0   4    5.22    0.37 
   5   0   4    3.84    0.35 
  -5   0  -4    4.80    0.40 
  -5   0  -4    5.51    0.42 
   5   0   4    4.79    0.35 
   5   0   4    4.58    0.35 
  -6   0  -4    4.95    0.34 
   6   0   4    4.47    0.32 
  -7  -1   4    2.77    0.19 
   7  -1  -4    1.95    0.17 
   7   1  -4    2.10    0.15 
   6  -1  -4   32.79    2.09 
  -6  -1   4   35.10    2.14 
  -6  -1   4   31.77    2.20 
   6  -1  -4   33.64    2.09 
   6  -1  -4   29.31    2.10 
  -6   1   4   33.34    2.09 
  -6   1   4   28.15    2.11 
   6   1  -4   33.72    2.03 
  -6   1   4   27.86    2.14 
   6   1  -4   29.64    2.01 
   6   1  -4   32.57    2.05 
  -6   1   4   35.96    2.06 
  -5  -1   4    2.81    0.34 
   5  -1  -4    3.15    0.27 
  -5  -1   4    2.66    0.31 
   5  -1  -4    3.16    0.27 
  -5  -1   4    2.99    0.34 
  -5  -1   4    2.23    0.44 
   5  -1  -4    3.03    0.31 
   5  -1  -4    2.94    0.26 
   5  -1  -4    2.41    0.37 
   5   1  -4    2.98    0.25 
   5   1  -4    2.97    0.25 
  -5   1   4    3.26    0.35 
   5   1  -4    3.03    0.27 
  -5   1   4    3.01    0.48 
  -5   1   4    2.59    0.29 
  -5   1   4    3.17    0.39 
   5   1  -4    3.05    0.36 
  -5   1   4    2.81    0.31 
   5   1  -4    2.53    0.35 
   4  -1  -4    9.86    0.73 
  -4  -1   4   10.30    0.75 
  -4  -1   4   11.16    0.87 
  -4  -1   4   10.04    0.69 
  -4  -1   4    9.51    0.71 
   4  -1  -4   10.36    0.70 
  -4  -1   4    9.01    0.76 
  -4  -1   4   10.99    0.77 
  -4  -1   4   10.65    0.83 
  -4  -1   4    9.73    0.85 
   4  -1  -4   10.92    0.93 
  -4  -1   4   10.27    0.82 
   4  -1  -4   10.80    0.71 
   4  -1  -4    9.70    0.70 
   4  -1  -4    9.86    0.77 
   4   1  -4    9.95    0.70 
   4   1  -4    9.67    0.73 
  -4   1   4   10.76    0.90 
   4   1  -4   10.80    0.89 
   4   1  -4   10.37    0.73 
  -4   1   4   10.45    0.76 
   4   1  -4   11.12    0.85 
   4   1  -4   10.42    0.70 
   4   1  -4   10.16    0.77 
  -4   1   4    9.04    0.74 
  -4   1   4   10.06    0.82 
  -4   1   4    9.12    0.74 
   4   1  -4    9.90    0.69 
  -4   1   4   10.98    0.84 
  -3  -1   4   39.49    2.70 
  -3  -1   4   44.71    2.82 
  -3  -1   4   47.42    2.74 
  -3  -1   4   44.94    2.79 
  -3  -1   4   35.75    3.33 
   3  -1  -4   40.27    2.70 
   3  -1  -4   44.43    2.68 
  -3  -1   4   40.76    2.76 
   3  -1  -4   42.68    2.75 
   3  -1  -4   40.31    2.72 
   3  -1  -4   42.07    2.69 
  -3  -1   4   42.97    8.79 
   3  -1  -4   42.34    2.67 
  -3  -1   4   41.73    2.78 
  -3  -1   4   40.48    2.67 
   3  -1  -4   40.79    9.04 
  -3  -1   4   42.12    2.67 
   3  -1  -4   41.86    2.83 
   3   1  -4   44.39    3.35 
  -3   1   4   47.13    2.73 
   3   1  -4   43.08    2.82 
   3   1  -4   26.45    8.65 
  -3   1   4   42.18    3.18 
  -3   1   4   43.86    2.87 
   3   1  -4   40.77    2.73 
   3   1  -4   42.90    2.78 
   3   1  -4   46.14    2.88 
  -3   1   4   45.42    2.87 
   3   1  -4   42.74    2.75 
  -3   1   4   43.55    2.73 
   3   1  -4   41.75    2.72 
   3   1  -4   40.28    2.76 
  -3   1   4   38.94    2.81 
  -2  -1   4   60.58    4.21 
  -2  -1   4   69.35    4.24 
  -2  -1   4   74.39    4.39 
  -2  -1   4   70.61    4.20 
   2  -1  -4   56.02    6.75 
   2  -1  -4   66.26    4.16 
  -2  -1   4   74.03    4.19 
   2  -1  -4   67.17    6.59 
   2  -1  -4   61.36    4.17 
   2  -1  -4   66.24    4.25 
  -2  -1   4   62.26    4.14 
  -2  -1   4   67.28    4.55 
   2  -1  -4   58.62    4.14 
  -2  -1   4   63.12    4.19 
   2   1  -4   66.65    7.59 
   2   1  -4   59.36    4.13 
   2   1  -4   72.01    4.25 
  -2   1   4   70.91    4.24 
   2   1  -4   57.48    4.17 
   2   1  -4   63.76    4.15 
  -2   1   4   72.27    4.16 
  -2   1   4   62.29    4.43 
   2   1  -4   67.59    4.17 
   1  -1  -4   53.29    5.41 
  -1  -1   4   45.20    3.19 
   1  -1  -4   47.55    4.96 
   1  -1  -4   52.79    3.21 
   1  -1  -4   55.58    3.26 
  -1  -1   4   53.30    3.49 
   1  -1  -4   46.90    3.19 
  -1  -1   4   47.89    3.24 
  -1  -1   4   51.32    3.26 
   1  -1  -4   50.07    3.20 
  -1  -1   4   53.21    3.23 
  -1  -1   4   52.30    3.41 
   1   1  -4   53.23    3.19 
   1   1  -4   48.12    3.11 
   1   1  -4   38.95    5.04 
  -1   1   4   51.09    3.35 
  -1   1   4   53.42    3.18 
  -1   1   4   52.67    3.13 
  -1   1   4   51.34    3.29 
  -1   1   4   43.64    3.11 
   1   1  -4   42.29    3.13 
   1   1  -4   52.23    5.07 
  -1   1   4   46.28    3.11 
   1   1  -4   54.46    3.13 
   0  -1  -4   53.90    5.53 
   0  -1   4   55.83    3.58 
   0  -1   4   58.82    3.55 
   0  -1  -4   50.23    3.52 
   0  -1   4   58.35    5.63 
   0  -1  -4   62.78    3.59 
   0  -1   4   56.29    3.72 
   0  -1  -4   56.74    3.74 
   0  -1   4   53.49    3.59 
   0  -1   4   56.04    3.56 
   0  -1  -4   57.60    3.54 
   0  -1   4   51.37    3.52 
   0  -1  -4   58.49    3.63 
   0   1   4   55.48    3.34 
   0   1  -4   51.71    5.20 
   0   1   4   54.22    3.34 
   0   1  -4   58.26    3.33 
   0   1   4   54.58    3.34 
   0   1  -4   47.41    3.33 
   0   1  -4   49.91    3.34 
   0   1  -4   52.09    3.51 
   0   1   4   54.51    5.31 
   0   1   4   63.55    3.94 
   0   1   4   44.63    3.35 
   0   1  -4   50.38    3.31 
  -1  -1  -4   45.48    3.10 
  -1  -1  -4   46.01    3.35 
   1  -1   4   48.68    3.39 
  -1  -1  -4   49.31    3.25 
   1  -1   4   54.90    3.22 
   1  -1   4   51.14    3.12 
   1  -1   4   50.46    5.47 
   1  -1   4   48.60    3.19 
  -1  -1  -4   50.19    3.15 
  -1  -1  -4   46.85    3.12 
  -1  -1  -4   56.38    6.50 
   1   1   4   50.49    5.45 
  -1   1  -4   48.72    2.90 
   1   1   4   43.42    2.86 
  -1   1  -4   42.54    5.49 
  -1   1  -4   45.43    3.10 
  -1   1  -4   47.80    2.88 
   1   1   4   46.06    2.90 
   1   1   4   44.21    2.87 
  -1   1  -4   41.88    2.95 
   1   1   4   46.16    2.92 
   1   1   4   46.01    3.22 
   1   1   4   44.92    2.96 
  -2  -1  -4   77.09    4.92 
   2  -1   4   74.98    4.83 
   2  -1   4   63.33    8.09 
   2  -1   4   84.81    5.01 
   2  -1   4   79.53    4.84 
   2  -1   4   78.63    4.88 
   2  -1   4   75.36    5.35 
   2  -1   4   76.86    4.92 
  -2  -1  -4   75.59    5.07 
  -2  -1  -4   75.00    4.87 
  -2  -1  -4   81.89   13.62 
  -2  -1  -4   73.25    5.25 
  -2   1  -4   67.60    4.93 
   2   1   4   73.71    4.66 
   2   1   4   73.12    4.76 
   2   1   4   74.86    4.61 
   2   1   4   63.28   10.38 
  -2   1  -4   96.73   11.13 
  -2   1  -4   72.03    4.64 
  -2   1  -4   76.46    4.65 
   2   1   4   76.14    5.28 
   2   1   4   75.27    4.70 
   2   1   4   69.18    4.60 
   2   1   4   73.73    4.61 
   3  -1   4   21.23    1.32 
   3  -1   4   21.15    1.32 
  -3  -1  -4   18.76    1.41 
   3  -1   4   22.54    1.56 
   3  -1   4   19.90    1.59 
   3  -1   4   19.59    1.31 
   3  -1   4   20.14    1.39 
  -3  -1  -4   21.65    1.50 
  -3  -1  -4   20.11    1.36 
  -3  -1  -4   18.17    1.36 
  -3  -1  -4   20.64    1.32 
   3   1   4   17.55    1.25 
   3   1   4   21.30    1.49 
  -3   1  -4   18.80    1.25 
  -3   1  -4   18.14    1.35 
   3   1   4   20.61    1.25 
   3   1   4   18.10    1.45 
   3   1   4   19.17    1.37 
  -3   1  -4   18.84    1.30 
  -3   1  -4   18.66    1.28 
   3   1   4   19.60    1.24 
  -3   1  -4   19.38    1.28 
  -3   1  -4   21.80    1.43 
  -3   1  -4   17.64    1.46 
   3   1   4   20.80    1.49 
  -4  -1  -4    5.09    0.46 
   4  -1   4    5.57    0.40 
   4  -1   4    5.87    0.88 
  -4  -1  -4    5.55    0.45 
  -4  -1  -4    4.16    0.63 
  -4  -1  -4    4.64    0.47 
   4  -1   4    5.32    0.49 
   4  -1   4    5.84    0.90 
   4  -1   4    5.30    0.60 
   4  -1   4    5.50    0.39 
   4  -1   4    4.98    0.39 
  -4   1  -4    5.01    0.41 
   4   1   4    4.28    0.35 
   4   1   4    5.41    0.37 
   4   1   4    4.95    0.52 
   4   1   4    4.37    0.52 
  -4   1  -4    5.17    0.41 
  -4   1  -4    3.96    0.60 
   4   1   4    4.02    0.73 
  -4   1  -4    4.45    0.45 
   4   1   4    5.11    0.36 
  -4   1  -4    4.60    0.43 
   5  -1   4    5.11    0.37 
  -5  -1  -4    5.11    0.42 
   5  -1   4    5.23    0.38 
  -5  -1  -4    5.24    0.44 
   5  -1   4    4.90    0.39 
  -5   1  -4    5.19    0.41 
  -5   1  -4    5.29    0.41 
   5   1   4    5.24    0.37 
   5   1   4    5.02    0.38 
  -5   1  -4    4.07    0.51 
   5   1   4    4.41    0.36 
  -5   1  -4    5.57    0.41 
   6  -1   4    1.96    0.17 
  -6  -1  -4    2.57    0.20 
  -6   1  -4    1.70    0.18 
   6   1   4    2.02    0.15 
  -6  -2   4    6.06    0.49 
   6  -2  -4    6.32    0.45 
   6  -2  -4    5.53    0.43 
   6  -2  -4    5.71    0.42 
  -6   2   4    5.25    0.50 
   6   2  -4    5.46    0.46 
  -6   2   4    5.65    0.44 
  -6   2   4    4.28    0.47 
  -6   2   4    5.59    0.41 
  -5  -2   4   60.78    3.81 
   5  -2  -4   59.72    3.84 
   5  -2  -4   65.87    3.88 
   5  -2  -4   58.30    3.83 
  -5  -2   4   60.50    3.91 
  -5  -2   4   56.98    3.91 
   5   2  -4   51.93    3.65 
   5   2  -4   59.24    3.67 
  -5   2   4   52.16    3.68 
   5   2  -4   57.79    3.57 
  -5   2   4   57.52    3.65 
  -5   2   4   56.49    3.85 
  -5   2   4   57.46    3.60 
  -5   2   4   57.33    3.77 
  -5   2   4   55.24    3.63 
  -5   2   4   57.31    3.73 
  -4  -2   4   64.32    4.17 
   4  -2  -4   70.72    4.15 
  -4  -2   4   71.08    4.24 
   4  -2  -4   61.08    4.37 
  -4  -2   4   58.18    4.21 
  -4  -2   4   59.27    4.29 
   4  -2  -4   67.03    4.14 
  -4  -2   4   68.94    4.15 
  -4  -2   4   66.34    4.30 
   4  -2  -4   62.40    4.15 
  -4  -2   4   70.15    4.32 
   4  -2  -4   63.30    4.17 
  -4  -2   4   63.31    4.25 
   4  -2  -4   69.68    4.38 
  -4   2   4   67.86    4.27 
  -4   2   4   63.56    4.08 
   4   2  -4   64.50    4.13 
   4   2  -4   62.37    4.07 
   4   2  -4   65.13    4.02 
  -4   2   4   56.81    4.04 
   4   2  -4   63.86    4.06 
  -4   2   4   65.87    4.19 
   4   2  -4   70.77    4.23 
  -4   2   4   65.93    4.16 
  -4   2   4   59.67    4.09 
   4   2  -4   55.64    4.09 
  -3  -2   4   51.56   10.46 
  -3  -2   4   47.09    3.01 
   3  -2  -4   52.64    3.20 
  -3  -2   4   41.68    3.91 
  -3  -2   4   45.81    3.02 
  -3  -2   4   48.40    3.09 
   3  -2  -4   47.30    3.00 
   3  -2  -4   47.99    3.02 
  -3  -2   4   45.69    3.09 
   3  -2  -4   27.93    9.01 
  -3  -2   4   46.74    3.05 
   3  -2  -4   47.79    3.08 
  -3  -2   4   44.49    3.10 
  -3  -2   4   48.30    3.14 
   3  -2  -4   48.82    3.06 
   3  -2  -4   45.37    3.03 
  -3  -2   4   50.09    3.15 
   3  -2  -4   49.50    3.01 
  -3  -2   4   46.71    3.01 
   3   2  -4   44.95    2.87 
   3   2  -4   44.94    2.93 
   3   2  -4   43.58    2.87 
  -3   2   4   44.50    2.89 
   3   2  -4   42.89   11.67 
  -3   2   4   40.39    2.94 
   3   2  -4   43.56    2.88 
  -3   2   4   43.61    2.93 
  -3   2   4   49.86    3.07 
  -3   2   4   39.28    3.08 
   3   2  -4   50.95    2.95 
   3   2  -4   43.22    2.90 
  -3   2   4   39.50    2.90 
   3   2  -4   50.60    3.04 
   3   2  -4   47.13    2.99 
  -3   2   4   50.03    3.01 
  -3   2   4   51.66    3.05 
   3   2  -4   47.38    3.73 
  -3   2   4   44.62    3.35 
  -3   2   4   44.40    2.98 
  -2  -2   4   76.82    4.74 
  -2  -2   4   75.13    4.64 
  -2  -2   4   66.62    4.68 
  -2  -2   4   74.70    4.66 
  -2  -2   4   74.23    4.69 
  -2  -2   4   74.43    5.75 
  -2  -2   4   71.48    4.73 
   2  -2  -4   73.02    8.02 
   2  -2  -4   70.44    4.73 
   2  -2  -4   71.76    4.65 
  -2  -2   4   68.70    4.69 
   2  -2  -4   82.29    4.64 
  -2  -2   4   80.35    4.68 
   2  -2  -4   71.14    4.66 
   2  -2  -4   72.31    4.62 
  -2   2   4   73.24    4.72 
   2   2  -4   82.39    4.74 
  -2   2   4   69.65    4.68 
   2   2  -4   79.16    4.65 
   2   2  -4   69.68    4.70 
  -2   2   4   82.38    4.76 
  -2   2   4   72.87    4.63 
   2   2  -4   75.83    8.81 
  -2   2   4   68.79    5.06 
   2   2  -4   67.76    4.63 
   2   2  -4   69.30    4.66 
  -2   2   4   70.16    4.84 
  -1  -2   4   70.21    4.44 
  -1  -2   4   72.24    4.64 
   1  -2  -4   68.31    4.41 
   1  -2  -4   66.20    6.21 
  -1  -2   4   71.57    4.44 
   1  -2  -4   70.59    4.45 
   1  -2  -4   66.44    4.38 
  -1  -2   4   70.79    4.41 
  -1  -2   4   66.21    4.71 
  -1  -2   4   64.73    4.47 
   1  -2  -4   74.38    4.52 
   1  -2  -4   73.61    4.39 
   1  -2  -4   70.31    6.73 
   1   2  -4   70.35    6.58 
   1   2  -4   62.65    6.96 
  -1   2   4   74.04    4.40 
   1   2  -4   66.96    4.30 
   1   2  -4   71.50    4.31 
  -1   2   4   66.25    4.47 
  -1   2   4   64.38    4.31 
   1   2  -4   61.72    4.31 
   1   2  -4   73.82    4.39 
   0  -2   4   24.00    1.64 
   0  -2  -4   25.85    1.88 
   0  -2   4   26.05    1.68 
   0  -2   4   25.96    1.66 
   0  -2   4   25.53    1.86 
   0  -2   4   24.65    1.71 
   0  -2   4   24.78    1.92 
   0  -2  -4   26.65    1.69 
   0  -2  -4   24.00    4.46 
   0  -2  -4   27.60    1.66 
   0  -2  -4   27.87    1.79 
   0   2   4   24.64    1.61 
   0   2   4   24.73    1.85 
   0   2   4   23.94    1.58 
   0   2   4   24.14    3.58 
   0   2   4   24.58    1.57 
   0   2  -4   24.18    4.15 
   1  -2   4    6.78    3.36 
   1  -2   4   12.91    0.89 
  -1  -2  -4   13.42    1.04 
   1  -2   4   14.32    0.87 
  -1  -2  -4    6.38    4.38 
  -1  -2  -4   12.98    0.88 
   1  -2   4   12.29    0.84 
   1  -2   4   12.79    1.16 
  -1  -2  -4   12.04    1.20 
   1  -2   4   12.85    0.96 
   1  -2   4   13.33    0.89 
  -1  -2  -4   13.35    0.92 
   1   2   4   12.04    0.80 
   1   2   4   12.06    0.76 
   1   2   4   11.11    0.78 
  -1   2  -4   11.89    0.76 
   1   2   4   12.59    1.30 
   1   2   4   11.56    0.85 
  -1   2  -4   10.64    0.80 
   1   2   4   13.27    4.01 
  -1   2  -4   10.97    0.76 
  -1   2  -4    6.06    3.27 
  -1   2  -4   10.15    1.01 
  -2  -2  -4   17.88    1.24 
   2  -2   4   17.64    1.22 
  -2  -2  -4   15.95    1.19 
  -2  -2  -4   15.54    1.37 
   2  -2   4   17.86    1.30 
   2  -2   4   18.03    1.13 
  -2  -2  -4   17.74    1.19 
  -2  -2  -4   18.15    1.14 
  -2  -2  -4   18.12    2.32 
   2  -2   4   17.85    1.14 
  -2  -2  -4   17.23    1.17 
   2  -2   4   18.85    1.18 
  -2  -2  -4   21.76   11.83 
  -2  -2  -4   18.61    1.15 
   2  -2   4   13.34    5.66 
   2   2   4   17.52    1.10 
   2   2   4   17.42    1.17 
   2   2   4   16.95    1.17 
  -2   2  -4   15.76    1.22 
   2   2   4   20.68    7.66 
   2   2   4   15.97    1.08 
   2   2   4   16.56    1.24 
   2   2   4   17.48    2.44 
  -2   2  -4   17.44    1.11 
  -3  -2  -4   15.26    1.38 
  -3  -2  -4   16.53    1.09 
  -3  -2  -4   17.53    1.06 
  -3  -2  -4   14.59    1.05 
  -3  -2  -4   15.48    1.13 
   3  -2   4   17.18    1.28 
   3  -2   4   16.79    1.04 
  -3  -2  -4   15.81    1.18 
   3  -2   4   14.65    1.16 
  -3  -2  -4   15.38    1.11 
   3  -2   4   15.83    1.04 
   3  -2   4   17.05    1.05 
  -3  -2  -4   14.83    1.15 
  -3  -2  -4   16.05    1.04 
   3  -2   4   15.58    1.11 
   3   2   4   14.00    0.96 
   3   2   4   13.94    1.17 
  -3   2  -4   15.10    0.99 
   3   2   4   14.23    1.06 
   3   2   4   14.31    1.09 
  -3   2  -4   15.23    1.00 
  -3   2  -4   15.42    1.04 
  -3   2  -4   15.68    1.14 
   3   2   4   14.04    1.03 
   3   2   4   16.42    0.97 
  -3   2  -4   13.04    1.16 
  -3   2  -4   16.00    1.11 
   3   2   4   14.83    0.96 
   3   2   4   12.63    1.10 
   4  -2   4    7.23    0.62 
  -4  -2  -4    7.15    0.60 
   4  -2   4    7.80    0.53 
  -4  -2  -4    7.02    0.66 
  -4  -2  -4    8.15    0.60 
   4  -2   4    8.07    0.54 
   4  -2   4    7.26    0.53 
  -4  -2  -4    7.50    0.53 
   4   2   4    6.10    0.49 
  -4   2  -4    7.62    0.70 
  -4   2  -4    6.09    0.74 
  -4   2  -4    7.05    0.58 
   4   2   4    7.17    0.58 
  -4   2  -4    7.64    0.54 
  -4   2  -4    7.86    0.64 
   4   2   4    7.76    0.51 
   5  -2   4    1.25    0.18 
   5  -2   4    0.69    0.13 
  -5  -2  -4    0.79    0.19 
   5  -2   4    0.84    0.13 
  -5  -2  -4    0.80    0.16 
  -5   2  -4    0.79    0.21 
   5   2   4    0.77    0.11 
  -5   2  -4    0.73    0.18 
  -5   2  -4    0.90    0.28 
  -5   2  -4    0.77    0.13 
   5   2   4    1.01    0.24 
   6  -2   4    2.39    0.18 
  -6  -2  -4    2.70    0.22 
  -6   2  -4    1.69    0.15 
   6  -3  -4    2.56    0.22 
   6  -3  -4    2.59    0.22 
  -6  -3   4    3.35    0.33 
   6  -3  -4    2.60    0.21 
   6   3  -4    2.70    0.27 
  -6   3   4    2.51    0.32 
  -6   3   4    2.40    0.31 
  -6   3   4    2.95    0.28 
   6   3  -4    2.31    0.18 
  -6   3   4    2.64    0.25 
   5  -3  -4   37.96    2.40 
   5  -3  -4   39.39    2.43 
  -5  -3   4   37.82    2.50 
   5  -3  -4   34.63    2.39 
  -5  -3   4   37.11    2.42 
  -5  -3   4   39.83    2.39 
  -5  -3   4   34.89    2.47 
  -5   3   4   33.76    2.31 
  -5   3   4   38.14    2.45 
  -5   3   4   36.93    2.32 
   5   3  -4   35.98    2.32 
  -5   3   4   32.50    2.39 
   5   3  -4   33.96    2.32 
  -5   3   4   33.77    2.35 
  -5   3   4   34.51    2.51 
   4  -3  -4   18.51    1.34 
   4  -3  -4   18.72    1.37 
  -4  -3   4   20.94    1.34 
   4  -3  -4   20.66    1.33 
  -4  -3   4   20.92    1.39 
  -4  -3   4   20.68    1.35 
  -4  -3   4   19.58    1.44 
   4  -3  -4   21.28    1.35 
  -4  -3   4   19.41    1.52 
  -4  -3   4   19.00    1.41 
  -4  -3   4   19.87    1.34 
   4  -3  -4   24.18    1.68 
  -4  -3   4   22.94    1.51 
   4   3  -4   19.79    1.27 
  -4   3   4   18.70    1.37 
  -4   3   4   18.93    1.46 
   4   3  -4   20.78    1.38 
  -4   3   4   20.55    1.44 
  -4   3   4   19.19    1.28 
   4   3  -4   18.34    1.36 
  -4   3   4   20.12    1.46 
  -4   3   4   21.50    1.56 
   4   3  -4   18.80    1.47 
  -4   3   4   19.00    1.35 
  -3  -3   4    5.98    0.57 
  -3  -3   4    5.75    0.43 
   3  -3  -4    5.27    0.57 
  -3  -3   4    5.25    0.42 
  -3  -3   4    4.92    0.48 
   3  -3  -4    5.68    0.40 
  -3  -3   4    5.90    0.42 
   3  -3  -4    5.84    0.41 
   3  -3  -4    5.52    0.44 
  -3  -3   4    6.46    0.56 
   3  -3  -4    5.41    0.58 
   3  -3  -4    6.29    0.42 
  -3  -3   4    5.23    0.57 
  -3  -3   4    6.00    0.51 
  -3  -3   4    6.43    0.54 
  -3   3   4    6.20    0.43 
  -3   3   4    4.89    0.41 
   3   3  -4    5.80    0.53 
   3   3  -4    6.15    0.45 
  -3   3   4    5.73    0.47 
  -3   3   4    6.30    0.60 
   3   3  -4    5.42    0.47 
   3   3  -4    5.37    0.39 
   3   3  -4    6.10    0.55 
  -3   3   4    5.67    0.55 
   3   3  -4    4.92    0.47 
  -3   3   4    5.32    0.46 
  -3   3   4    5.51    0.49 
  -3   3   4    6.32    0.53 
  -2  -3   4   11.56    0.86 
  -2  -3   4   12.42    0.78 
  -2  -3   4   10.66    0.83 
  -2  -3   4   10.95    0.89 
   2  -3  -4   11.58    0.87 
   2  -3  -4   11.36    0.75 
  -2  -3   4   11.44    0.76 
  -2  -3   4   10.51    1.60 
   2  -3  -4   10.67    4.60 
   2  -3  -4   12.22    0.76 
   2  -3  -4   11.59    0.79 
  -2  -3   4   11.75    0.80 
  -2  -3   4   11.38    0.84 
  -2   3   4   11.23    0.77 
  -2   3   4   11.66    1.20 
   2   3  -4   10.82    0.80 
   2   3  -4   12.15    0.77 
   2   3  -4   10.91    0.84 
  -2   3   4   12.71    0.91 
   2   3  -4   11.40    0.85 
  -2   3   4    9.45    0.84 
   2   3  -4    8.37    5.82 
   1  -3  -4   84.02    7.92 
   1  -3  -4   86.57    5.41 
  -1  -3   4   93.02    5.48 
   1  -3  -4   92.51    5.39 
  -1  -3   4   83.71    5.79 
  -1  -3   4   86.42    5.38 
   1  -3  -4   81.52    5.37 
   1  -3  -4   83.93    5.43 
  -1  -3   4   78.22    5.95 
  -1  -3   4   83.77    5.41 
  -1  -3   4   72.05    5.47 
   1  -3  -4   95.70    5.56 
  -1  -3   4   88.18    5.50 
  -1  -3   4   84.21    5.44 
   1  -3  -4   90.51    8.24 
   1   3  -4   78.37   11.28 
  -1   3   4   86.57    5.30 
   1   3  -4   92.95    5.28 
  -1   3   4   79.52    5.48 
  -1   3   4   83.36    5.52 
   1   3  -4   80.42    5.36 
   1   3  -4   72.26    5.31 
  -1   3   4   92.23    5.41 
   0  -3   4   25.87    1.87 
   0  -3   4   24.31    1.69 
   0  -3   4   24.01    1.65 
   0  -3   4   26.63    1.67 
   0  -3  -4   24.87    1.61 
   0  -3  -4   27.44    1.80 
   0  -3  -4   25.61    1.61 
   0  -3  -4   25.37    1.73 
   0  -3   4   21.62    1.94 
   0  -3  -4   18.49    4.76 
   0  -3   4   25.01    1.63 
   0  -3  -4   25.99    1.63 
   0   3  -4   18.26    1.12 
   0   3  -4   24.32    4.14 
   0   3   4   14.96    1.02 
   0   3  -4   14.17    1.05 
  -1  -3  -4   69.05    4.65 
   1  -3   4   61.53    4.89 
   1  -3   4   76.45    4.68 
  -1  -3  -4   72.84    4.71 
  -1  -3  -4   74.85    4.63 
  -1  -3  -4   72.85    4.86 
  -1  -3  -4   76.58    4.64 
  -1  -3  -4   85.18   10.89 
  -1  -3  -4   71.54    5.03 
   1  -3   4   68.24    4.62 
   1  -3   4   75.77    4.69 
   1  -3   4   72.99    4.61 
  -1  -3  -4   77.32    4.67 
   1  -3   4   83.15    4.78 
  -1   3  -4   60.53    4.41 
  -1   3  -4   71.72    8.63 
   1   3   4   74.30    4.89 
   1   3   4   72.08    4.32 
   1   3   4   71.45    4.34 
   1   3   4   64.23    8.61 
  -1   3  -4   64.92    4.31 
  -2  -3  -4    0.42    0.19 
   2  -3   4    0.73    0.09 
  -2  -3  -4    0.62    0.26 
  -2  -3  -4    0.68    0.13 
  -2  -3  -4    0.41    0.12 
   2  -3   4    0.59    0.20 
  -2  -3  -4    0.54    0.12 
   2  -3   4    0.69    0.12 
  -2  -3  -4    0.76    0.12 
  -2  -3  -4    0.52    0.09 
   2  -3   4    1.01    0.20 
   2  -3   4    0.71    0.09 
   2   3   4    0.68    0.17 
   2   3   4    0.61    0.08 
   2   3   4    0.69    0.17 
  -2   3  -4    0.47    0.13 
  -2   3  -4    0.61    0.14 
   2   3   4    0.81    0.20 
  -2   3  -4    0.64    0.20 
   2   3   4    0.46    0.09 
   2   3   4    0.47    0.13 
   2   3   4    0.35    0.17 
  -2   3  -4    0.45    0.16 
  -2   3  -4    0.58    0.17 
  -3  -3  -4    4.69    0.41 
  -3  -3  -4    4.74    0.42 
  -3  -3  -4    4.63    0.47 
   3  -3   4    4.38    0.40 
  -3  -3  -4    5.34    0.52 
  -3  -3  -4    4.22    0.52 
  -3  -3  -4    4.30    0.68 
   3  -3   4    4.16    0.34 
  -3  -3  -4    4.33    0.36 
  -3  -3  -4    4.93    0.36 
   3  -3   4    4.53    0.59 
  -3  -3  -4    5.17    0.38 
   3  -3   4    4.79    0.35 
   3  -3   4    4.75    0.34 
  -3   3  -4    4.06    0.51 
  -3   3  -4    5.31    0.58 
  -3   3  -4    4.38    0.41 
   3   3   4    4.49    0.37 
   3   3   4    4.57    0.40 
   4  -3   4    1.00    0.17 
   4  -3   4    0.93    0.13 
  -4  -3  -4    0.60    0.14 
   4  -3   4    0.51    0.16 
  -4  -3  -4    0.92    0.29 
  -4  -3  -4    0.91    0.15 
  -4  -3  -4    0.43    0.22 
   4  -3   4    0.76    0.11 
  -4   3  -4    1.08    0.31 
   4   3   4    0.76    0.20 
   4   3   4    0.87    0.15 
   4   3   4    0.98    0.23 
  -4   3  -4    0.91    0.21 
  -4   3  -4    0.86    0.25 
  -5  -3  -4    0.48    0.12 
  -5  -3  -4    0.54    0.13 
   5  -3   4    0.75    0.11 
   5  -3   4    0.82    0.11 
   5  -3   4    0.93    0.11 
   5   3   4    0.60    0.07 
  -5   3  -4    0.44    0.19 
  -5   3  -4    0.56    0.15 
  -5   3  -4    0.62    0.18 
   6  -4  -4    3.51    0.26 
  -6  -4   4    3.73    0.31 
  -6   4   4    3.65    0.28 
  -6   4   4    3.56    0.34 
   6   4  -4    2.76    0.33 
  -6   4   4    3.53    0.29 
  -6   4   4    2.93    0.33 
   5  -4  -4    9.23    0.64 
  -5  -4   4    9.07    0.64 
   5  -4  -4    9.79    0.66 
  -5  -4   4   10.00    0.75 
   5  -4  -4    9.55    0.63 
  -5  -4   4    7.85    0.70 
  -5   4   4    8.56    0.67 
  -5   4   4    8.83    0.67 
   5   4  -4    8.24    0.67 
  -5   4   4    9.21    0.76 
  -5   4   4    8.82    0.76 
  -4  -4   4   63.63    4.08 
   4  -4  -4   62.07    4.02 
  -4  -4   4   66.30    4.04 
   4  -4  -4   65.34    4.04 
  -4  -4   4   62.23    4.12 
  -4  -4   4   66.98    4.05 
   4  -4  -4   64.00    4.04 
  -4  -4   4   63.98    4.16 
  -4  -4   4   57.68    4.04 
   4   4  -4   55.98    3.91 
  -4   4   4   62.78    3.92 
  -4   4   4   57.64    4.02 
  -4   4   4   61.08    3.93 
   4   4  -4   61.48    3.88 
  -4   4   4   63.75    4.05 
  -4   4   4   63.43    4.12 
  -4   4   4   58.65    3.98 
  -3  -4   4   20.44    1.45 
   3  -4  -4   22.19    1.33 
   3  -4  -4   20.98    1.31 
  -3  -4   4   20.36    1.34 
  -3  -4   4   20.44    1.35 
   3  -4  -4   19.91    1.51 
  -3  -4   4   20.20    1.45 
  -3  -4   4   20.76    1.53 
  -3  -4   4   20.03    1.35 
   3  -4  -4   20.59    1.33 
  -3  -4   4   18.03    1.39 
  -3  -4   4   20.56    1.39 
  -3   4   4   18.85    1.40 
   3   4  -4   16.27    1.34 
   3   4  -4   20.76    1.42 
  -3   4   4   20.73    1.46 
  -3   4   4   19.22    1.32 
  -3   4   4   21.26    1.42 
   3   4  -4   19.17    1.34 
  -3   4   4   21.01    1.31 
   3   4  -4   16.46    1.33 
   3   4  -4   20.22    1.29 
  -3   4   4   18.06    1.41 
  -3   4   4   19.09    1.34 
  -3   4   4   21.61    1.51 
  -2  -4   4    0.37    0.08 
  -2  -4   4    0.45    0.13 
  -2  -4   4    0.70    0.18 
   2  -4  -4    0.48    0.16 
  -2  -4   4    0.76    0.12 
   2  -4  -4    0.45    0.07 
  -2  -4   4    0.86    0.25 
   2  -4  -4    0.64    0.23 
  -2  -4   4    0.42    0.10 
   2  -4  -4    0.63    0.09 
  -2  -4   4    0.46    0.13 
   2   4  -4    0.67    0.21 
   2   4  -4    0.70    0.17 
   2   4  -4    0.99    0.19 
   2   4  -4    0.49    0.13 
  -2   4   4    0.60    0.13 
   2   4  -4    0.77    0.22 
  -2   4   4    0.61    0.18 
  -2   4   4    0.43    0.10 
  -2   4   4    0.60    0.17 
  -2   4   4    0.67    0.16 
   2   4  -4    0.55    0.15 
  -2   4   4    0.88    0.26 
  -2   4   4    0.80    0.25 
  -2   4   4    0.73    0.19 
   2   4  -4    0.49    0.09 
  -1  -4   4   15.38    1.16 
  -1  -4   4   15.09    1.07 
   1  -4  -4   15.48    1.01 
  -1  -4   4   16.50    1.02 
   1  -4  -4   14.78    1.02 
  -1  -4   4   14.89    1.08 
  -1  -4   4   16.46    1.04 
  -1  -4   4   14.68    1.93 
   1  -4  -4   17.16    1.03 
   1  -4  -4   16.65    1.24 
  -1  -4   4   15.89    1.12 
  -1  -4   4   14.97    1.09 
  -1   4   4   16.66    1.03 
   1   4  -4   14.95    1.08 
   1   4  -4   -1.11    6.86 
  -1   4   4   13.59    1.00 
   1   4  -4   12.43    0.99 
  -1   4   4   14.41    1.02 
  -1   4   4   14.48    1.06 
  -1   4   4   16.74    1.16 
   1   4  -4   15.63    1.03 
   0  -4   4   23.92    1.66 
   0  -4  -4   24.63    1.57 
   0  -4  -4   23.05    1.54 
   0  -4   4   19.29    2.06 
   0  -4  -4   26.87    1.70 
   0  -4  -4   23.92    2.74 
   0  -4  -4   25.70    1.78 
   0  -4  -4   22.77    1.55 
   0  -4   4   22.38    1.60 
   0  -4   4   23.99    1.57 
   0  -4   4   24.54    1.54 
   0  -4   4   25.15    1.62 
   0  -4   4   24.50    1.53 
   0   4   4   21.32    1.45 
   0   4   4   19.83    1.43 
   0   4   4   20.46    1.41 
   0   4  -4   21.03    1.49 
   0   4   4   23.43    1.44 
   0   4  -4   24.88    1.46 
   0   4  -4   23.07    1.55 
   0   4   4   21.89    1.49 
   0   4  -4   12.79    5.45 
   0   4  -4   20.45    1.44 
   0   4  -4   22.85    1.46 
   0   4   4   17.90    2.19 
  -1  -4  -4    6.06    0.46 
  -1  -4  -4    6.26    0.45 
  -1  -4  -4    6.40    0.45 
   1  -4   4    6.99    0.61 
   1  -4   4    6.12    0.42 
   1  -4   4    5.36    0.53 
  -1  -4  -4    5.83    0.53 
  -1  -4  -4    6.13    0.43 
  -1  -4  -4    6.49    0.48 
   1  -4   4    6.23    0.41 
  -1  -4  -4    6.14    0.67 
  -1   4  -4    5.57    0.47 
  -1   4  -4    5.28    0.41 
   1   4   4    5.46    0.44 
   1   4   4    5.64    0.46 
  -1   4  -4    6.49    0.56 
  -1   4  -4    6.16    0.50 
  -1   4  -4    6.22    0.49 
   1   4   4    6.16    0.49 
   1   4   4    5.74    0.48 
   1   4   4    5.63    0.46 
  -2  -4  -4    8.56    0.59 
  -2  -4  -4    8.14    0.90 
  -2  -4  -4    8.18    0.72 
  -2  -4  -4    8.02    0.65 
   2  -4   4    8.97    0.81 
  -2  -4  -4    9.09    0.61 
  -2  -4  -4    8.07    0.62 
   2  -4   4    8.34    0.57 
   2  -4   4    7.87    0.56 
  -2  -4  -4    8.98    0.61 
   2  -4   4    9.14    0.62 
  -2   4  -4    7.47    0.60 
  -2   4  -4    7.38    0.53 
   2   4   4    7.69    0.58 
   2   4   4    7.60    0.59 
   2   4   4    7.34    0.57 
   2   4   4    7.52    0.60 
  -2   4  -4    7.73    0.66 
  -2   4  -4    8.48    0.64 
   2   4   4    7.50    0.61 
  -2   4  -4    8.23    0.60 
  -2   4  -4    8.93    0.72 
  -2   4  -4    8.02    0.66 
   2   4   4    7.84    0.60 
   2   4   4    8.85    0.66 
  -3  -4  -4    4.20    0.35 
   3  -4   4    4.93    0.95 
  -3  -4  -4    4.23    0.40 
  -3  -4  -4    4.43    0.35 
  -3  -4  -4    3.85    0.51 
  -3  -4  -4    4.44    0.48 
   3  -4   4    4.03    0.31 
  -3  -4  -4    4.90    0.37 
   3  -4   4    4.20    0.33 
   3  -4   4    4.52    0.38 
  -3  -4  -4    4.57    0.60 
  -3   4  -4    3.92    0.41 
  -3   4  -4    4.18    0.46 
  -3   4  -4    4.11    0.39 
  -3   4  -4    2.93    0.49 
  -3   4  -4    4.52    0.48 
   3   4   4    3.41    0.37 
  -3   4  -4    4.04    0.37 
   3   4   4    4.10    0.39 
   3   4   4    3.63    0.37 
   4  -4   4    5.15    0.35 
  -4  -4  -4    4.96    0.42 
  -4  -4  -4    4.45    0.42 
  -4  -4  -4    4.72    0.37 
   4  -4   4    4.39    0.34 
  -4   4  -4    4.18    0.46 
  -4   4  -4    3.70    0.40 
  -4   4  -4    4.83    0.41 
   4   4   4    4.87    0.41 
  -4   4  -4    3.74    0.46 
  -5  -4  -4    0.28    0.13 
   5  -4   4    0.25    0.06 
   5  -4   4    0.22    0.06 
  -5  -4  -4    0.12    0.10 
   5  -4   4    0.11    0.05 
  -5   4  -4    0.13    0.10 
   5   4   4    0.21    0.11 
  -5   4  -4    0.18    0.11 
  -5   4  -4    0.22    0.11 
  -6   5   4    3.62    0.30 
  -6   5   4    4.40    0.34 
   6   5  -4    3.96    0.29 
  -5  -5   4    0.46    0.11 
   5  -5  -4    0.65    0.12 
  -5  -5   4    0.45    0.12 
   5  -5  -4    0.40    0.07 
  -5   5   4    0.50    0.18 
  -5   5   4    0.35    0.12 
  -5   5   4    0.50    0.19 
  -5   5   4    0.30    0.13 
   5   5  -4    0.57    0.14 
  -5   5   4    0.64    0.16 
  -4  -5   4    5.90    0.51 
   4  -5  -4    6.21    0.42 
  -4  -5   4    5.89    0.45 
  -4  -5   4    5.90    0.46 
   4  -5  -4    5.78    0.43 
  -4  -5   4    5.68    0.45 
  -4   5   4    5.66    0.63 
   4   5  -4    5.45    0.47 
   4   5  -4    4.57    0.46 
  -4   5   4    4.87    0.54 
  -4   5   4    5.59    0.48 
  -4   5   4    5.85    0.56 
  -4   5   4    4.82    0.52 
  -4   5   4    5.57    0.49 
  -3  -5   4   44.19    2.99 
   3  -5  -4   46.77    2.91 
  -3  -5   4   43.95    2.94 
  -3  -5   4   43.84    3.05 
  -3  -5   4   48.30    2.95 
  -3  -5   4   47.17    2.94 
   3  -5  -4   46.15    2.90 
  -3   5   4   46.04    2.83 
  -3   5   4   43.76    3.02 
  -3   5   4   42.47    2.86 
   3   5  -4   40.40    2.82 
  -3   5   4   44.92    2.92 
  -3   5   4   44.92    2.93 
   3   5  -4   41.87    2.83 
  -3   5   4   45.37    2.86 
  -3   5   4   44.84    2.98 
  -3   5   4   40.42    2.83 
  -2  -5   4    6.73    0.63 
  -2  -5   4    7.84    0.54 
   2  -5  -4    7.42    0.51 
  -2  -5   4    7.53    0.55 
  -2  -5   4    8.37    0.56 
   2  -5  -4    8.21    0.53 
  -2  -5   4    7.33    0.72 
  -2  -5   4    7.47    0.58 
   2  -5  -4    6.92    0.77 
  -2   5   4    6.32    0.57 
  -2   5   4    7.83    0.71 
  -2   5   4    6.29    0.61 
  -2   5   4    8.20    0.76 
   2   5  -4    6.56    0.55 
  -2   5   4    5.95    0.49 
   2   5  -4    5.69    0.61 
  -2   5   4    7.22    0.54 
  -2   5   4    7.06    0.80 
   2   5  -4    6.87    0.51 
  -2   5   4    6.63    0.59 
   1  -5  -4   35.99    2.11 
   1  -5  -4   29.09    2.11 
  -1  -5   4   32.81    2.10 
   1  -5  -4   36.02    2.40 
   1  -5  -4   31.40    2.10 
  -1  -5   4   32.54    2.14 
  -1  -5   4   28.87    2.16 
  -1  -5   4   35.57    2.12 
  -1  -5   4   31.02    2.20 
  -1  -5   4   35.47    2.30 
  -1  -5   4   33.45    2.21 
  -1   5   4   31.73    2.05 
  -1   5   4   26.35    1.98 
  -1   5   4   29.20    1.98 
  -1   5   4   35.07    2.15 
  -1   5   4   31.67    2.00 
   1   5  -4   27.08    1.96 
  -1   5   4   33.65    2.01 
  -1   5   4   28.80    1.96 
   1   5  -4   27.04    1.95 
   1   5  -4   30.90    2.00 
   1   5  -4   29.35    2.10 
   0  -5   4   29.24    1.99 
   0  -5  -4   28.05    2.11 
   0  -5   4   26.26    1.98 
   0  -5   4   29.21    1.82 
   0  -5  -4   28.54    1.83 
   0  -5  -4   27.52    1.81 
   0  -5  -4   30.37    1.86 
   0  -5   4   28.09    1.84 
   0  -5   4   27.69    1.89 
   0   5   4   24.74    1.73 
   0   5  -4   22.55    1.70 
   0   5  -4   26.55    1.84 
   0   5   4   24.47    1.66 
   0   5   4   27.73    1.78 
   0   5  -4   23.77    1.66 
   0   5  -4   27.13    1.74 
   0   5   4   24.39    1.70 
   0   5   4   24.81    1.72 
   0   5   4   28.46    1.74 
   0   5   4   29.93    1.74 
  -1  -5  -4   22.20    1.44 
  -1  -5  -4   22.17    1.77 
   1  -5   4   22.09    1.40 
  -1  -5  -4   19.10    1.44 
  -1  -5  -4   22.88    1.44 
  -1  -5  -4   23.13    1.49 
  -1  -5  -4   22.19    1.43 
   1  -5   4   22.86    1.42 
   1  -5   4   23.04    1.64 
   1  -5   4   22.39    1.51 
  -1  -5  -4   19.93    1.55 
   1   5   4   20.62    1.46 
  -1   5  -4   18.25    1.40 
  -1   5  -4   22.77    1.45 
  -1   5  -4   20.31    1.43 
   1   5   4   22.77    1.46 
   1   5   4   21.06    1.43 
   1   5   4   19.05    1.39 
  -1   5  -4   20.51    1.44 
   1   5   4   20.70    1.41 
  -1   5  -4   22.26    1.54 
   1   5   4   22.60    1.46 
  -2  -5  -4   11.06    0.73 
  -2  -5  -4    7.81    1.06 
   2  -5   4   10.09    0.67 
  -2  -5  -4   10.60    0.71 
  -2  -5  -4   10.69    0.72 
   2  -5   4   10.99    0.74 
  -2  -5  -4   10.47    0.79 
  -2  -5  -4    9.10    1.07 
   2  -5   4   10.36    0.69 
   2  -5   4    9.92    0.95 
  -2  -5  -4    9.84    0.93 
   2   5   4    9.93    0.72 
  -2   5  -4    9.06    0.73 
   2   5   4    9.14    0.72 
  -2   5  -4    8.88    0.77 
  -2   5  -4   11.35    0.87 
  -2   5  -4   10.44    0.77 
  -2   5  -4    9.25    0.72 
   2   5   4   10.17    0.74 
   2   5   4    9.79    0.76 
  -2   5  -4    9.32    0.73 
   2   5   4   10.45    0.77 
   2   5   4   10.97    0.80 
  -3  -5  -4    3.58    0.51 
  -3  -5  -4    3.19    0.33 
   3  -5   4    2.73    0.26 
  -3  -5  -4    2.95    0.28 
   3  -5   4    2.88    0.32 
  -3  -5  -4    3.15    0.32 
   3  -5   4    3.02    0.24 
  -3   5  -4    3.16    0.34 
  -3   5  -4    2.31    0.33 
  -3   5  -4    2.98    0.45 
  -3   5  -4    2.48    0.37 
   3   5   4    2.11    0.30 
   3   5   4    2.67    0.39 
   4  -5   4    1.83    0.14 
   4  -5   4    1.51    0.14 
  -4  -5  -4    1.36    0.20 
  -4  -5  -4    1.38    0.18 
  -4  -5  -4    1.12    0.16 
  -4   5  -4    1.12    0.25 
   4   5   4    1.55    0.22 
  -4   5  -4    1.35    0.26 
  -4   5  -4    1.15    0.20 
  -4   5  -4    1.46    0.21 
  -5  -5  -4    0.07    0.07 
  -5   5  -4    0.10    0.06 
  -5   5  -4    0.10    0.08 
   5   5   4    0.14    0.08 
  -5   5  -4    0.11    0.09 
  -5  -6   4    4.40    0.31 
  -5  -6   4    4.41    0.34 
  -5   6   4    5.07    0.38 
   5   6  -4    4.80    0.36 
  -5   6   4    5.15    0.42 
  -5   6   4    3.96    0.40 
  -4  -6   4   16.01    1.04 
  -4  -6   4   13.97    0.97 
  -4  -6   4   13.73    0.97 
  -4  -6   4   14.74    0.98 
  -4   6   4   12.90    0.91 
  -4   6   4   11.25    0.98 
  -4   6   4   13.48    0.91 
  -4   6   4   11.12    0.93 
   4   6  -4   13.04    0.89 
  -4   6   4   14.26    0.97 
  -3  -6   4   23.66    1.63 
  -3  -6   4   27.15    1.63 
   3  -6  -4   25.30    1.58 
  -3  -6   4   23.93    1.68 
  -3  -6   4   23.70    1.62 
   3   6  -4   24.56    1.57 
  -3   6   4   23.20    1.76 
  -3   6   4   22.46    1.65 
  -3   6   4   24.04    1.71 
   3   6  -4   22.44    1.57 
  -3   6   4   22.96    1.59 
  -3   6   4   24.09    1.64 
  -3   6   4   24.18    1.60 
   3   6  -4   22.58    1.53 
  -2  -6   4    3.36    0.30 
  -2  -6   4    3.43    0.33 
   2  -6  -4    2.93    0.26 
  -2  -6   4    3.66    0.29 
  -2  -6   4    3.25    0.29 
   2  -6  -4    3.30    0.25 
   2   6  -4    2.65    0.28 
   2   6  -4    3.01    0.28 
  -2   6   4    2.89    0.43 
  -2   6   4    3.08    0.38 
   2   6  -4    2.85    0.32 
  -2   6   4    2.89    0.33 
   2   6  -4    2.81    0.34 
  -2   6   4    3.05    0.34 
  -2   6   4    2.96    0.32 
  -2   6   4    2.74    0.28 
  -2   6   4    3.11    0.32 
   1  -6  -4   17.32    1.12 
   1  -6  -4   17.12    1.09 
  -1  -6   4   18.74    1.14 
  -1  -6   4   15.39    1.12 
  -1  -6   4   16.52    1.15 
   1  -6  -4   16.35    1.11 
  -1  -6   4   17.32    1.12 
  -1  -6   4   16.15    1.34 
   1   6  -4   14.73    1.06 
  -1   6   4   13.83    1.07 
   1   6  -4   16.18    1.11 
   1   6  -4   14.74    1.10 
  -1   6   4   15.25    1.07 
  -1   6   4   15.64    1.10 
  -1   6   4   17.15    1.24 
  -1   6   4   17.00    1.11 
  -1   6   4   14.69    1.06 
   1   6  -4   15.23    1.02 
  -1   6   4   15.26    1.09 
  -1   6   4   15.59    1.15 
   0  -6   4   15.79    1.29 
   0  -6   4   15.79    1.05 
   0  -6  -4   14.12    1.36 
   0  -6   4   14.88    1.26 
   0  -6   4   15.93    1.05 
   0  -6  -4   15.55    1.05 
   0  -6  -4   15.23    1.01 
   0  -6   4   15.38    1.01 
   0   6  -4   13.95    1.00 
   0   6  -4   14.31    1.03 
   0   6   4   14.25    1.02 
   0   6   4   14.18    1.13 
   0   6  -4   14.65    1.03 
   0   6   4   14.07    0.99 
   0   6   4   15.34    1.03 
   0   6   4   14.34    1.07 
   0   6  -4   14.87    1.04 
   0   6   4   13.39    1.00 
   0   6  -4   12.67    1.11 
   0   6   4   14.09    1.02 
  -1  -6  -4    9.17    0.73 
   1  -6   4   10.06    0.67 
  -1  -6  -4    9.97    0.68 
  -1  -6  -4   10.23    0.69 
  -1  -6  -4    8.79    0.69 
  -1  -6  -4   10.73    0.70 
   1  -6   4    9.05    0.77 
   1  -6   4   10.25    0.65 
   1  -6   4   10.12    0.69 
   1   6   4    9.91    0.72 
  -1   6  -4    9.60    0.71 
  -1   6  -4    8.42    0.71 
   1   6   4    9.53    0.74 
   1   6   4    9.20    0.75 
  -1   6  -4    8.08    0.67 
   1   6   4    9.79    0.72 
   1   6   4    9.52    0.65 
   1   6   4    8.79    0.70 
  -1   6  -4    9.77    0.83 
  -1   6  -4   10.07    0.74 
   1   6   4    9.47    0.71 
  -2  -6  -4    3.10    0.32 
  -2  -6  -4    3.75    0.36 
   2  -6   4    3.41    0.38 
  -2  -6  -4    3.80    0.32 
  -2  -6  -4    5.37    0.52 
   2  -6   4    3.18    0.33 
  -2  -6  -4    4.15    0.40 
   2  -6   4    4.10    0.28 
   2  -6   4    3.78    0.28 
  -2   6  -4    3.41    0.32 
   2   6   4    3.11    0.39 
   2   6   4    3.18    0.33 
  -2   6  -4    4.07    0.41 
   2   6   4    3.45    0.42 
   2   6   4    3.88    0.43 
   3  -6   4    5.36    0.36 
   3  -6   4    5.20    0.35 
  -3  -6  -4    4.89    0.39 
  -3  -6  -4    4.39    0.39 
  -3  -6  -4    5.75    0.44 
  -3   6  -4    4.44    0.37 
  -3   6  -4    5.03    0.40 
   3   6   4    4.37    0.38 
  -3   6  -4    4.29    0.48 
   3   6   4    4.98    0.38 
  -3   6  -4    4.06    0.40 
   4  -6   4    0.46    0.10 
  -4  -6  -4    0.49    0.09 
  -4  -6  -4    0.28    0.08 
  -4   6  -4    0.30    0.09 
  -4   6  -4    0.29    0.11 
  -4   6  -4    0.27    0.13 
  -4  -7   4    0.03    0.05 
  -4  -7   4    0.07    0.09 
  -4  -7   4    0.07    0.07 
   4   7  -4    0.09    0.09 
  -4   7   4   -0.02    0.07 
  -4   7   4    0.13    0.13 
  -4   7   4    0.11    0.10 
  -4   7   4    0.03    0.08 
  -4   7   4    0.02    0.11 
   4   7  -4    0.05    0.05 
  -3  -7   4    7.73    0.55 
  -3  -7   4    7.77    0.55 
  -3  -7   4    7.59    0.54 
   3   7  -4    7.06    0.57 
  -3   7   4    7.30    0.54 
  -3   7   4    7.42    0.54 
  -3   7   4    5.81    0.59 
   3   7  -4    7.18    0.48 
   3   7  -4    6.16    0.54 
  -2  -7   4   51.05    2.97 
  -2  -7   4   41.43    2.93 
  -2  -7   4   45.34    2.93 
   2   7  -4   40.64    2.48 
   2   7  -4   43.07    2.58 
  -2   7   4   39.77    2.55 
  -2   7   4   39.73    2.58 
  -2   7   4   35.10    2.62 
   2   7  -4   41.85    2.62 
   2   7  -4   39.76    2.54 
  -2   7   4   34.58    2.52 
  -1  -7   4    2.32    0.21 
  -1  -7   4    2.32    0.22 
  -1  -7   4    2.30    0.21 
   1  -7  -4    2.18    0.19 
  -1   7   4    2.08    0.27 
   1   7  -4    2.03    0.28 
   1   7  -4    2.35    0.30 
  -1   7   4    1.64    0.32 
  -1   7   4    2.19    0.32 
  -1   7   4    2.12    0.25 
  -1   7   4    1.97    0.28 
  -1   7   4    1.96    0.25 
   1   7  -4    2.02    0.25 
   1   7  -4    2.17    0.28 
   0  -7   4   21.83    1.45 
   0  -7  -4   22.67    1.45 
   0  -7  -4   22.56    1.46 
   0  -7   4   22.54    1.47 
   0   7   4   19.17    1.35 
   0   7   4   19.54    1.34 
   0   7  -4   19.91    1.38 
   0   7   4   18.19    1.35 
   0   7  -4   19.31    1.37 
   0   7   4   20.65    1.38 
   0   7   4   22.04    1.44 
   0   7  -4   18.80    1.33 
   0   7   4   20.08    1.37 
   0   7   4   18.78    1.44 
   0   7  -4   21.13    1.38 
  -1  -7  -4    3.81    0.33 
   1  -7   4    3.81    0.30 
  -1  -7  -4    4.09    0.32 
  -1  -7  -4    4.35    0.33 
   1  -7   4    4.27    0.36 
  -1   7  -4    3.41    0.35 
  -1   7  -4    3.53    0.34 
   1   7   4    3.55    0.34 
  -1   7  -4    3.65    0.34 
   1   7   4    3.35    0.35 
   1   7   4    3.61    0.34 
   1   7   4    3.03    0.34 
   1   7   4    3.11    0.37 
  -1   7  -4    3.06    0.42 
  -2  -7  -4   10.04    0.78 
   2  -7   4   10.61    0.73 
  -2  -7  -4   11.68    0.77 
  -2  -7  -4   12.73    0.80 
  -2   7  -4    9.43    0.78 
   2   7   4   11.52    0.81 
  -2   7  -4   11.47    0.90 
   2   7   4   11.30    0.79 
   2   7   4   10.88    0.75 
  -2   7  -4   10.99    0.81 
  -2   7  -4   11.82    0.81 
  -2   7  -4   11.05    0.79 
   2   7   4   12.11    0.82 
  -3  -7  -4    3.80    0.33 
  -3  -7  -4    4.63    0.34 
  -3  -7  -4    4.64    0.33 
  -3   7  -4    5.08    0.46 
  -3   7  -4    3.65    0.34 
   3   7   4    4.31    0.30 
   3   7   4    3.67    0.32 
  -3   7  -4    4.35    0.33 
  -3  -8   4    7.74    0.51 
  -3  -8   4    6.79    0.51 
  -3  -8   4    7.84    0.54 
  -3   8   4    4.26    0.44 
   3   8  -4    5.07    0.38 
  -3   8   4    5.82    0.40 
   3   8  -4    5.43    0.42 
  -3   8   4    5.77    0.45 
  -2  -8   4    0.91    0.12 
  -2  -8   4    1.02    0.12 
  -2  -8   4    0.82    0.13 
   2   8  -4    0.83    0.13 
  -2   8   4    0.34    0.12 
   2   8  -4    0.54    0.17 
  -2   8   4    0.61    0.16 
   2   8  -4    0.64    0.15 
   2   8  -4    0.53    0.16 
  -2   8   4    0.83    0.20 
  -2   8   4    0.98    0.17 
   1  -8  -4    1.94    0.17 
   1  -8  -4    1.68    0.17 
  -1  -8   4    1.92    0.18 
  -1  -8   4    1.85    0.17 
   1   8  -4    1.68    0.24 
   1   8  -4    1.91    0.23 
  -1   8   4    1.53    0.24 
  -1   8   4    1.84    0.24 
  -1   8   4    1.33    0.24 
   1   8  -4    1.86    0.22 
  -1   8   4    1.53    0.22 
   1   8  -4    2.37    0.33 
  -1   8   4    1.67    0.23 
   0  -8  -4    2.48    0.22 
   0  -8   4    2.59    0.20 
   0  -8   4    2.58    0.21 
   0  -8  -4    2.47    0.21 
   0   8   4    2.10    0.28 
   0   8   4    1.89    0.24 
   0   8   4    1.79    0.24 
   0   8  -4    2.19    0.25 
   0   8  -4    2.30    0.23 
   0   8   4    1.74    0.23 
   0   8   4    1.53    0.20 
   0   8  -4    2.33    0.25 
   0   8  -4    1.79    0.22 
  -1  -8  -4    3.69    0.31 
  -1  -8  -4    4.01    0.30 
  -1  -8  -4    4.18    0.31 
  -1   8  -4    2.31    0.29 
   1   8   4    2.48    0.28 
   1   8   4    2.40    0.25 
  -2  -8  -4    0.94    0.12 
  -2  -8  -4    0.84    0.12 
  -2   8  -4    0.86    0.13 
   2   8   4    0.61    0.12 
  -2   8  -4    0.94    0.13 
  -2   8  -4    0.62    0.17 
   2   8   4    0.86    0.15 
  -1   9   4    8.34    0.64 
  -1   9   4    9.81    0.64 
   1   9  -4   10.39    0.65 
  -1   9   4    9.38    0.67 
  -1   9   4    9.29    0.63 
   0   9   4    4.30    0.30 
   0   9   4    3.78    0.32 
   0   9  -4    3.55    0.30 
   0   9   4    4.37    0.31 
   0   9  -4    3.99    0.31 
   7   0  -5    3.08    0.21 
   6   0  -5    5.66    0.39 
  -6   0   5    4.59    0.48 
   6   0  -5    5.11    0.37 
   6   0  -5    4.90    0.37 
  -6   0   5    5.31    0.43 
   5   0  -5    6.39    0.46 
   5   0  -5    5.93    0.51 
   5   0  -5    6.64    0.47 
  -5   0   5    5.89    0.52 
  -5   0   5    5.76    0.52 
   5   0  -5    6.28    0.56 
  -5   0   5    5.72    0.65 
   4   0  -5   36.08    2.30 
   4   0  -5   37.68    2.53 
   4   0  -5   35.81    2.31 
   4   0  -5   32.85    2.33 
  -4   0   5   34.64    2.46 
   4   0  -5   36.55    2.31 
  -4   0   5   38.46    2.36 
   4   0  -5   37.42    2.34 
  -4   0   5   36.60    2.33 
  -4   0   5   35.47    2.44 
  -4   0   5   32.31    2.36 
  -4   0   5   40.22    2.51 
  -4   0   5   30.62    2.34 
   4   0  -5   34.65    2.38 
  -4   0   5   39.52    2.46 
   4   0  -5   36.43    2.38 
   3   0  -5   46.68    3.09 
  -3   0   5   48.95    3.06 
   3   0  -5   46.34    3.03 
  -3   0   5   43.61    3.57 
   3   0  -5   45.67    2.95 
   3   0  -5   42.62    2.92 
  -3   0   5   46.87    3.04 
   3   0  -5   59.42   20.59 
  -3   0   5   49.97    2.98 
   3   0  -5   42.77    2.97 
  -3   0   5   42.51    3.02 
  -3   0   5   47.87    3.09 
   3   0  -5   46.20    2.98 
  -3   0   5   49.62    3.06 
   3   0  -5   45.91    2.94 
  -2   0   5   22.31    2.06 
   2   0  -5   27.52    1.74 
   2   0  -5   25.30    1.71 
  -2   0   5   27.66    1.66 
  -2   0   5   25.96    1.75 
   2   0  -5   24.07    1.65 
   2   0  -5   24.71    1.66 
  -2   0   5   26.73    2.00 
   2   0  -5   20.45    5.38 
   2   0  -5   25.82    1.65 
   2   0  -5   28.81    4.95 
   2   0  -5   25.07    1.63 
  -2   0   5   23.29    1.63 
  -2   0   5   24.74    1.70 
  -1   0   5    1.66    0.38 
   1   0  -5    1.55    0.22 
   1   0  -5    1.59    0.17 
  -1   0   5    1.41    0.17 
   1   0  -5   -1.20    2.47 
  -1   0   5    1.99    0.50 
   1   0  -5    1.25    0.13 
   1   0  -5    1.46    0.24 
  -1   0   5    1.55    0.18 
   1   0  -5    1.24    2.20 
   1   0  -5    1.54    0.15 
  -1   0   5    1.69    0.24 
   0   0   5   30.41    4.38 
   0   0   5   28.34    1.88 
   0   0   5   29.52    2.10 
   0   0  -5   26.39    1.84 
   0   0   5   29.64    1.85 
   0   0  -5   25.53    1.89 
   0   0   5   28.55    1.83 
   0   0  -5   30.37    4.70 
   0   0   5   30.75    1.86 
   0   0  -5   29.67    1.83 
   0   0  -5   26.72    1.80 
   0   0   5   27.86    1.80 
   0   0  -5   27.66    2.08 
   0   0  -5   31.27    1.85 
   1   0   5   46.21    2.91 
  -1   0  -5   41.57    2.86 
   1   0   5   43.09    2.88 
   1   0   5   47.18    2.87 
   1   0   5   45.37    2.84 
  -1   0  -5   42.76    2.87 
  -1   0  -5   43.79    2.87 
  -1   0  -5   47.17    2.90 
  -1   0  -5   45.86    3.00 
  -1   0  -5   45.05    3.20 
  -1   0  -5   49.93    7.70 
   1   0   5   47.48    3.30 
   1   0   5   49.76    5.95 
  -2   0  -5   38.09    2.80 
   2   0   5   40.00    2.58 
  -2   0  -5   38.01    2.64 
  -2   0  -5   34.74    3.22 
   2   0   5   40.19    2.59 
   2   0   5   41.13    2.76 
   2   0   5   18.36    7.67 
  -2   0  -5   27.94   11.30 
   2   0   5   45.05    2.59 
   2   0   5   41.31    2.65 
  -2   0  -5   41.82    2.66 
   2   0   5   41.82    2.68 
  -2   0  -5   43.72    2.75 
  -2   0  -5   40.86    2.61 
   2   0   5   41.87    2.58 
  -3   0  -5    2.96    0.31 
   3   0   5    3.14    0.25 
  -3   0  -5    3.29    0.43 
  -3   0  -5    3.06    0.30 
  -3   0  -5    2.59    0.32 
   3   0   5    2.98    0.25 
   3   0   5    2.26    0.43 
   3   0   5    2.90    0.39 
   3   0   5    2.74    0.33 
   3   0   5    3.26    0.25 
  -4   0  -5   39.83    2.96 
   4   0   5   49.00    3.04 
   4   0   5   45.14    3.10 
  -4   0  -5   39.73    3.21 
  -4   0  -5   49.25    2.98 
   4   0   5   48.26    2.93 
  -4   0  -5   46.53    2.97 
   4   0   5   49.45    2.93 
  -5   0  -5    4.31    0.36 
   5   0   5    4.11    0.32 
   5   0   5    4.58    0.33 
   5   0   5    4.25    0.32 
  -5   0  -5    4.66    0.37 
   6   0   5    0.00    0.03 
  -6   0  -5    0.04    0.08 
   7  -1  -5    0.44    0.06 
   7   1  -5    0.50    0.06 
   6  -1  -5    3.97    0.33 
   6  -1  -5    4.56    0.34 
  -6  -1   5    3.96    0.44 
  -6  -1   5    4.61    0.39 
   6  -1  -5    4.43    0.32 
   6   1  -5    4.32    0.32 
   6   1  -5    3.63    0.30 
  -6   1   5    4.09    0.44 
  -6   1   5    3.53    0.36 
  -6   1   5    4.51    0.35 
  -5  -1   5    4.38    0.45 
   5  -1  -5    4.23    0.46 
   5  -1  -5    5.06    0.38 
   5  -1  -5    4.60    0.40 
   5  -1  -5    4.31    0.37 
  -5  -1   5    4.78    0.41 
  -5   1   5    4.86    0.42 
  -5   1   5    3.65    0.52 
   5   1  -5    4.09    0.36 
   5   1  -5    4.79    0.43 
  -5   1   5    4.14    0.39 
   5   1  -5    4.26    0.34 
  -5   1   5    4.02    0.37 
   5   1  -5    3.60    0.40 
  -5   1   5    3.81    0.44 
  -4  -1   5    5.49    0.46 
  -4  -1   5    4.81    0.53 
   4  -1  -5    4.97    0.42 
  -4  -1   5    5.24    0.40 
  -4  -1   5    4.96    0.48 
   4  -1  -5    5.53    0.48 
   4  -1  -5    5.35    0.41 
  -4  -1   5    5.90    0.58 
   4  -1  -5    5.15    0.61 
   4  -1  -5    5.51    0.41 
   4  -1  -5    5.73    0.44 
  -4  -1   5    6.08    0.48 
  -4  -1   5    5.53    0.54 
   4  -1  -5    5.47    0.42 
  -4  -1   5    6.03    0.58 
  -4   1   5    5.86    0.56 
   4   1  -5    5.78    0.48 
   4   1  -5    5.60    0.50 
  -4   1   5    5.87    0.57 
  -4   1   5    6.07    0.60 
   4   1  -5    5.31    0.41 
   4   1  -5    5.44    0.41 
   4   1  -5    5.51    0.40 
  -4   1   5    5.13    0.47 
   4   1  -5    5.44    0.46 
  -4   1   5    5.06    0.46 
   4   1  -5    5.08    0.44 
  -4   1   5    5.11    0.52 
  -4   1   5    5.53    0.47 
  -4   1   5    5.86    0.59 
   4   1  -5    5.54    0.59 
  -3  -1   5   52.79    3.67 
   3  -1  -5   57.82    3.59 
  -3  -1   5   58.96    3.73 
   3  -1  -5   54.95    3.62 
   3  -1  -5   53.69    3.73 
  -3  -1   5   61.82    3.71 
  -3  -1   5   53.87    3.58 
  -3  -1   5   56.79    3.65 
   3  -1  -5   45.50   11.25 
  -3  -1   5   52.80    3.57 
   3  -1  -5   58.53    3.58 
  -3  -1   5   57.44    3.70 
   3  -1  -5   58.15    3.67 
   3  -1  -5   55.63    3.57 
  -3  -1   5   53.67    4.50 
  -3  -1   5   55.02    3.66 
   3  -1  -5   54.36    3.61 
  -3  -1   5   63.57    3.65 
  -3   1   5   55.73    3.54 
   3   1  -5   55.44    3.67 
  -3   1   5   50.13    3.62 
   3   1  -5   56.69    3.58 
   3   1  -5   55.36    3.63 
   3   1  -5   63.02   10.60 
   3   1  -5   53.71    3.57 
   3   1  -5   52.86    3.52 
  -3   1   5   61.25    3.66 
   3   1  -5   53.35   11.28 
   3   1  -5   50.89    3.53 
  -3   1   5   59.67    3.67 
  -3   1   5   59.41    3.53 
   3   1  -5   55.83    3.55 
  -3   1   5   59.36    3.69 
   3   1  -5   53.02    3.52 
  -2  -1   5   68.96    4.48 
  -2  -1   5   70.12    4.40 
   2  -1  -5   68.85    4.40 
   2  -1  -5   68.62    7.32 
   2  -1  -5   66.23    4.41 
  -2  -1   5   64.35    4.45 
   2  -1  -5   59.94    4.37 
   2  -1  -5   72.48    4.49 
   2  -1  -5   71.55    8.90 
  -2  -1   5   72.71    4.42 
  -2  -1   5   72.70    4.43 
   2  -1  -5   79.49    4.51 
   2  -1  -5   70.93    4.39 
  -2  -1   5   72.83    4.50 
  -2  -1   5   64.65    4.38 
  -2  -1   5   70.09    4.76 
   2   1  -5   59.69    4.27 
  -2   1   5   66.35    4.54 
  -2   1   5   66.67    4.64 
  -2   1   5   56.98    4.30 
  -2   1   5   64.79    4.41 
   2   1  -5   67.06    8.12 
  -2   1   5   71.70    4.26 
   2   1  -5   65.63    4.24 
   2   1  -5   69.45    4.25 
  -2   1   5   72.61    4.34 
   2   1  -5   70.35    4.35 
   2   1  -5   58.34    8.18 
   2   1  -5   71.25    4.33 
   2   1  -5   71.88    4.27 
  -1  -1   5   59.97    4.34 
  -1  -1   5   58.30    4.04 
   1  -1  -5   67.52    6.88 
  -1  -1   5   66.32    4.04 
   1  -1  -5   64.72    4.08 
  -1  -1   5   63.51    4.28 
   1  -1  -5   67.21    6.36 
   1  -1  -5   63.76    4.00 
   1  -1  -5   66.14    4.11 
   1  -1  -5   63.00    4.02 
  -1  -1   5   62.44    4.08 
  -1   1   5   62.07    4.17 
   1   1  -5   57.94    3.87 
   1   1  -5   64.43    3.93 
  -1   1   5   65.60    3.90 
   1   1  -5   55.15    6.60 
   1   1  -5   61.08    6.93 
  -1   1   5   56.49    3.87 
  -1   1   5   52.98    3.83 
  -1   1   5   64.77    4.09 
   1   1  -5   63.83    3.85 
  -1   1   5   61.88    3.85 
   1   1  -5   59.75    3.83 
   0  -1  -5  158.30   13.24 
   0  -1  -5  164.52   10.50 
   0  -1  -5  164.92   10.40 
   0  -1   5  153.33   12.87 
   0  -1   5  182.52   10.47 
   0  -1   5  159.88   10.45 
   0  -1  -5  164.31   10.66 
   0  -1   5  160.35   10.46 
   0  -1  -5  171.93   10.42 
   0  -1   5  167.06   10.65 
   0   1   5  146.50    9.35 
   0   1  -5  139.07    9.37 
   0   1   5  156.20    9.39 
   0   1   5  128.51    9.40 
   0   1   5  148.86    9.37 
   0   1  -5  157.42   11.99 
   0   1  -5  151.51    9.41 
   0   1   5  148.36    9.39 
   0   1  -5  146.73    9.36 
   0   1  -5  166.85    9.38 
   0   1   5  157.22    9.66 
  -1  -1  -5  165.52    9.90 
   1  -1   5  158.51   10.23 
  -1  -1  -5  150.38    9.86 
  -1  -1  -5  161.51   15.29 
   1  -1   5  160.18    9.89 
   1  -1   5  156.43    9.82 
  -1  -1  -5  152.20    9.83 
   1  -1   5  162.80    9.96 
  -1  -1  -5  153.00   10.17 
   1  -1   5  153.75    9.83 
  -1  -1  -5  164.90   10.05 
   1  -1   5  166.08    9.87 
  -1  -1  -5  148.55    9.86 
   1  -1   5  163.27   13.31 
  -1  -1  -5  144.93    9.85 
  -1   1  -5  142.07    9.49 
  -1   1  -5  144.93   13.70 
   1   1   5  157.53    9.95 
  -1   1  -5  138.22    9.49 
   1   1   5  148.30    9.49 
   1   1   5  141.05    9.51 
  -1   1  -5  155.93    9.50 
   1   1   5  165.65    9.48 
  -1   1  -5  163.32    9.52 
   1   1   5  142.71   12.66 
  -1   1  -5  148.82    9.59 
   1   1   5  156.69    9.70 
  -1   1  -5  143.45    9.77 
   1   1   5  159.45    9.54 
   2  -1   5   82.42    4.97 
   2  -1   5   83.71    5.03 
   2  -1   5   83.33    5.07 
  -2  -1  -5   69.09    5.65 
   2  -1   5   80.39    4.96 
  -2  -1  -5   49.83   14.71 
   2  -1   5   82.37    5.15 
  -2  -1  -5   71.68    5.01 
  -2  -1  -5   72.50    5.22 
  -2  -1  -5   82.69    5.09 
  -2  -1  -5   77.88    4.97 
  -2  -1  -5   78.44    5.00 
  -2  -1  -5   80.92    4.97 
   2   1   5   44.00   10.07 
   2   1   5   81.52    4.83 
  -2   1  -5   80.97    4.88 
   2   1   5   85.10    4.83 
   2   1   5   80.26    5.01 
   2   1   5   71.27    6.84 
  -2   1  -5   71.72    4.86 
   2   1   5   72.32    4.82 
  -2   1  -5   74.86    4.88 
  -2   1  -5   68.53    4.98 
  -2   1  -5   79.42    4.97 
   2   1   5   73.03    4.88 
  -2   1  -5   80.19    4.86 
   2   1   5   78.45    4.93 
  -3  -1  -5   20.08    1.31 
   3  -1   5   20.54    1.56 
   3  -1   5   21.62    1.32 
   3  -1   5   20.59    1.40 
   3  -1   5   20.68    1.31 
   3  -1   5   21.15    1.31 
  -3  -1  -5   18.82    1.42 
   3  -1   5   18.92    1.44 
  -3  -1  -5   19.30    1.37 
  -3  -1  -5   18.56    1.65 
  -3  -1  -5   20.96    1.36 
   3   1   5   19.58    1.41 
  -3   1  -5   18.69    1.37 
   3   1   5   16.48    1.31 
  -3   1  -5   19.58    1.33 
   3   1   5   19.29    1.36 
  -3   1  -5   21.75    1.46 
  -3   1  -5   18.53    1.49 
  -3   1  -5   20.08    1.30 
  -3   1  -5   19.04    1.30 
   3   1   5   18.62    1.26 
   3   1   5   18.75    1.49 
   3   1   5   20.00    1.26 
   3   1   5   21.87    1.27 
   4  -1   5   25.43    1.44 
  -4  -1  -5   18.38    1.70 
  -4  -1  -5   18.70    1.48 
  -4  -1  -5   22.11    1.47 
   4  -1   5   21.96    1.52 
  -4  -1  -5   23.54    1.46 
   4  -1   5   21.80    1.41 
   4  -1   5   21.37    1.41 
   4  -1   5   20.49    1.59 
   4   1   5   19.66    1.36 
   4   1   5   20.63    1.52 
  -4   1  -5   22.55    1.41 
   4   1   5   19.76    1.35 
  -4   1  -5   22.85    1.41 
   4   1   5   21.81    1.53 
   4   1   5   22.63    1.38 
  -4   1  -5   17.32    1.60 
  -4   1  -5   20.48    1.42 
   5  -1   5    3.90    0.28 
  -5  -1  -5    3.66    0.33 
  -5  -1  -5    3.45    0.31 
   5  -1   5    3.62    0.28 
   5  -1   5    3.19    0.27 
  -5   1  -5    2.76    0.37 
   5   1   5    3.32    0.25 
   5   1   5    2.57    0.25 
  -5   1  -5    3.65    0.29 
   6  -2  -5    2.02    0.19 
   6  -2  -5    2.24    0.22 
  -6  -2   5    1.92    0.25 
  -6   2   5    1.49    0.28 
  -6   2   5    1.87    0.20 
   6   2  -5    2.27    0.33 
  -6   2   5    1.57    0.24 
   5  -2  -5   19.84    1.30 
   5  -2  -5   19.51    1.32 
  -5  -2   5   17.26    1.34 
   5  -2  -5   17.36    1.24 
  -5  -2   5   20.25    1.40 
   5   2  -5   19.93    1.32 
  -5   2   5   15.96    1.33 
  -5   2   5   16.37    1.19 
  -5   2   5   15.95    1.30 
   5   2  -5   16.84    1.15 
  -5   2   5   19.83    1.30 
  -5   2   5   17.66    1.23 
   4  -2  -5   20.19    1.51 
   4  -2  -5   20.47    1.28 
  -4  -2   5   20.65    1.45 
  -4  -2   5   18.50    1.31 
   4  -2  -5   19.84    1.29 
   4  -2  -5   19.61    1.26 
  -4  -2   5   18.85    1.29 
   4  -2  -5   17.63    1.33 
  -4  -2   5   20.83    1.46 
  -4  -2   5   20.59    1.37 
  -4  -2   5   18.80    1.39 
   4  -2  -5   18.51    1.27 
  -4  -2   5   16.57    1.38 
   4   2  -5   20.46    1.32 
  -4   2   5   17.77    1.29 
  -4   2   5   19.38    1.46 
  -4   2   5   19.57    1.32 
   4   2  -5   18.93    1.30 
   4   2  -5   19.83    1.37 
   4   2  -5   17.08    1.28 
  -4   2   5   19.02    1.43 
   4   2  -5   17.39    1.22 
   4   2  -5   17.38    1.32 
  -4   2   5   20.59    1.43 
   4   2  -5   20.07    1.46 
  -3  -2   5   32.06    2.28 
  -3  -2   5   30.57    3.76 
   3  -2  -5   34.65    2.24 
  -3  -2   5   31.88    2.49 
   3  -2  -5   33.13    2.22 
  -3  -2   5   34.02    2.20 
  -3  -2   5   36.32    2.27 
   3  -2  -5   34.06    2.20 
   3  -2  -5   36.24    2.37 
  -3  -2   5   33.76    2.18 
   3  -2  -5   36.16    2.20 
  -3  -2   5   35.66    2.34 
   3  -2  -5   34.02    2.18 
   3  -2  -5   34.71    2.28 
  -3  -2   5   32.97    2.19 
  -3  -2   5   34.25    2.23 
   3   2  -5   34.31    2.21 
   3   2  -5   27.76    2.12 
  -3   2   5   33.43    2.09 
  -3   2   5   33.32    2.21 
   3   2  -5   30.43    2.05 
   3   2  -5   29.96    2.05 
  -3   2   5   29.00    2.09 
   3   2  -5   32.19    2.06 
   3   2  -5   35.91    2.12 
  -3   2   5   35.73    2.27 
  -3   2   5   36.45    2.21 
   3   2  -5   33.57    2.12 
   3   2  -5   30.95   12.92 
   3   2  -5   30.45    2.08 
  -3   2   5   27.18    2.15 
  -3   2   5   34.73    2.15 
   2  -2  -5   85.79    5.19 
   2  -2  -5   85.27    5.20 
   2  -2  -5   82.76    5.15 
   2  -2  -5   82.02    5.14 
  -2  -2   5   85.72    5.27 
  -2  -2   5   73.70    5.21 
  -2  -2   5   79.16    5.15 
   2  -2  -5   85.97    5.15 
  -2  -2   5   85.53    5.21 
  -2  -2   5   83.94    5.18 
   2  -2  -5   76.17    5.25 
  -2  -2   5   81.85    5.60 
  -2  -2   5   81.27    5.26 
  -2  -2   5   79.64    5.76 
  -2  -2   5   79.41    5.14 
   2  -2  -5   65.79    9.65 
  -2   2   5   87.19    5.24 
   2   2  -5   77.94    5.16 
  -2   2   5   85.97    5.25 
   2   2  -5   86.02   11.23 
   2   2  -5   86.13    5.15 
  -2   2   5   79.51    5.14 
   2   2  -5   72.99    9.76 
  -2   2   5   87.09    5.67 
  -2   2   5   73.89    5.18 
   2   2  -5   71.78    5.12 
   2   2  -5   78.28    5.21 
   2   2  -5   87.48    5.25 
  -1  -2   5   15.01    1.02 
  -1  -2   5   13.64    0.93 
  -1  -2   5   12.97    0.99 
   1  -2  -5   13.47    0.97 
  -1  -2   5   13.28    0.89 
  -1  -2   5   13.95    0.95 
  -1  -2   5   14.42    0.92 
   1  -2  -5   13.48    0.91 
   1  -2  -5   14.62    1.05 
   1  -2  -5   12.99    0.90 
   1  -2  -5   13.53    0.93 
   1  -2  -5   15.91    3.80 
   1  -2  -5   14.39    0.93 
  -1  -2   5   13.34    1.29 
   1  -2  -5   19.74    4.50 
  -1   2   5   12.87    0.84 
  -1   2   5   11.48    0.86 
  -1   2   5   13.79    0.93 
   1   2  -5   13.13    0.84 
   1   2  -5   12.40    0.88 
   1   2  -5    9.25    3.60 
  -1   2   5   11.77    0.82 
  -1   2   5   11.62    1.20 
   1   2  -5   13.57    4.26 
   1   2  -5   12.11    0.82 
  -1   2   5   12.83    1.15 
   0  -2   5  137.08    8.58 
   0  -2   5  136.20    8.78 
   0  -2  -5  143.53   12.08 
   0  -2   5  128.54    8.48 
   0  -2  -5  137.44    8.65 
   0  -2   5  128.13    8.62 
   0  -2  -5  131.09    8.80 
   0  -2  -5  135.19    8.53 
   0  -2   5  140.30    8.52 
   0  -2   5  136.54    8.49 
   0  -2  -5  126.73    8.48 
   0  -2   5  141.57    8.89 
   0  -2   5  149.48    8.57 
   0  -2   5  133.98    8.59 
   0  -2  -5  131.68    8.51 
   0   2  -5  127.73   10.60 
   0   2   5  125.36    8.06 
   0   2  -5  137.42    7.73 
   0   2   5  109.13    7.72 
   0   2   5  117.37   10.62 
   0   2   5  126.16    7.77 
   0   2  -5  107.49   10.55 
   0   2   5  124.80    7.74 
   0   2   5  119.89    7.72 
  -1  -2  -5   11.01    0.70 
   1  -2   5    4.31    4.59 
  -1  -2  -5    9.07    6.66 
   1  -2   5   10.44    0.75 
   1  -2   5   10.56    0.69 
   1  -2   5   10.63    0.83 
   1  -2   5   10.32    0.68 
  -1  -2  -5    9.96    1.28 
  -1  -2  -5   10.23    0.73 
  -1  -2  -5   10.21    0.77 
  -1  -2  -5   10.42    0.71 
  -1  -2  -5   10.28    0.72 
   1  -2   5   11.20    0.73 
  -1  -2  -5   10.60    0.90 
  -1   2  -5    0.92    5.30 
  -1   2  -5    8.55    0.65 
   1   2   5    9.50    0.73 
   1   2   5    7.99    0.63 
   1   2   5   14.01    4.82 
   1   2   5    9.46    0.63 
   1   2   5    8.49    1.28 
   1   2   5    9.58    0.67 
  -1   2  -5    9.91    1.15 
  -1   2  -5    8.65    0.62 
  -1   2  -5    9.74    0.61 
   1   2   5    9.09    0.65 
  -2  -2  -5   14.15    0.92 
   2  -2   5   13.90    1.10 
   2  -2   5   13.88    0.90 
  -2  -2  -5   13.59    0.94 
   2  -2   5   14.91    0.95 
  -2  -2  -5   13.94    0.98 
  -2  -2  -5   13.80    1.02 
   2  -2   5   14.05    0.96 
  -2  -2  -5   14.10    0.94 
  -2  -2  -5   13.69    0.91 
  -2  -2  -5   12.09    1.17 
   2  -2   5   13.82    1.01 
   2   2   5   11.85    0.89 
  -2   2  -5   13.53    0.88 
  -2   2  -5   12.71    0.87 
   2   2   5   11.50    0.86 
   2   2   5   12.03    1.01 
  -2   2  -5   14.19    0.99 
  -2   2  -5   12.84    0.90 
   2   2   5   12.24    0.84 
   2   2   5   13.51    0.95 
   2   2   5   11.47    0.91 
   2   2   5   14.53    0.98 
   2   2   5   13.39    0.84 
   2   2   5   12.88    0.86 
  -2   2  -5   13.51    0.98 
  -2   2  -5   12.17    0.98 
   3  -2   5   45.51    2.97 
  -3  -2  -5   50.83    2.90 
  -3  -2  -5   40.26    2.88 
  -3  -2  -5   42.13    2.95 
  -3  -2  -5   46.08    2.93 
  -3  -2  -5   41.23    3.02 
   3  -2   5   46.89    3.15 
  -3  -2  -5   41.27    3.27 
   3  -2   5   42.06    3.02 
   3  -2   5   50.51    2.90 
   3  -2   5   48.18    2.89 
   3  -2   5   49.25    2.88 
   3   2   5   42.33    3.03 
  -3   2  -5   43.17    2.81 
  -3   2  -5   46.92    2.83 
   3   2   5   41.42    2.85 
   3   2   5   42.15    2.91 
  -3   2  -5   38.20    2.98 
  -3   2  -5   43.49    2.85 
   3   2   5   37.87    2.77 
  -3   2  -5   47.61    2.94 
   3   2   5   49.14    2.78 
  -3   2  -5   48.47    2.99 
   4  -2   5   19.90    1.32 
   4  -2   5   17.12    1.49 
  -4  -2  -5   18.67    1.56 
  -4  -2  -5   20.87    1.37 
   4  -2   5   22.84    1.37 
  -4  -2  -5   20.82    1.35 
   4  -2   5   20.22    1.32 
  -4   2  -5   16.78    1.23 
  -4   2  -5   18.33    1.39 
   4   2   5   17.47    1.32 
  -4   2  -5   19.40    1.65 
  -4   2  -5   19.43    1.40 
   4   2   5   17.43    1.20 
   5  -2   5    5.79    0.43 
   5  -2   5    6.53    0.43 
  -5  -2  -5    6.56    0.57 
  -5  -2  -5    6.26    0.47 
   5  -2   5    5.68    0.44 
   5   2   5    5.90    0.47 
  -5   2  -5    5.43    0.48 
  -5   2  -5    6.11    0.43 
  -6  -3   5    0.64    0.15 
   6  -3  -5    0.55    0.11 
   6  -3  -5    0.50    0.09 
  -6   3   5    0.73    0.18 
   6   3  -5    0.45    0.14 
  -6   3   5    0.57    0.14 
  -6   3   5    0.51    0.18 
  -6   3   5    0.64    0.13 
  -5  -3   5    3.30    0.27 
  -5  -3   5    4.03    0.43 
   5  -3  -5    3.44    0.29 
  -5  -3   5    2.89    0.36 
   5  -3  -5    2.93    0.27 
   5   3  -5    2.84    0.33 
  -5   3   5    3.00    0.43 
  -5   3   5    2.39    0.36 
  -5   3   5    3.02    0.33 
  -5   3   5    3.20    0.34 
   5   3  -5    3.21    0.24 
  -5   3   5    3.17    0.40 
  -4  -3   5   20.48    1.59 
   4  -3  -5   20.90    1.74 
   4  -3  -5   25.40    1.53 
  -4  -3   5   27.12    1.71 
   4  -3  -5   24.59    1.50 
  -4  -3   5   23.76    1.73 
  -4  -3   5   22.15    1.61 
  -4  -3   5   23.51    1.75 
  -4  -3   5   20.69    1.50 
  -4  -3   5   24.84    1.52 
  -4  -3   5   25.03    1.63 
   4  -3  -5   23.72    1.57 
  -4  -3   5   20.75    1.52 
   4  -3  -5   21.82    1.51 
  -4   3   5   23.43    1.69 
   4   3  -5   24.86    1.58 
   4   3  -5   20.72    1.59 
  -4   3   5   23.56    1.58 
  -4   3   5   21.61    1.51 
  -4   3   5   24.97    1.68 
  -4   3   5   24.53    1.76 
   4   3  -5   22.78    1.76 
   4   3  -5   23.19    1.58 
  -4   3   5   22.01    1.60 
   4   3  -5   23.77    1.50 
   3  -3  -5    6.33    0.46 
   3  -3  -5    6.27    0.46 
   3  -3  -5    6.67    0.58 
   3  -3  -5    6.56    0.46 
  -3  -3   5    6.25    0.47 
  -3  -3   5    5.29    0.54 
   3  -3  -5    5.93    0.50 
  -3  -3   5    6.24    0.59 
  -3  -3   5    6.68    0.62 
  -3  -3   5    6.49    0.51 
  -3  -3   5    6.64    0.55 
  -3  -3   5    6.54    0.47 
   3   3  -5    6.44    0.57 
  -3   3   5    5.41    0.45 
   3   3  -5    6.67    0.49 
  -3   3   5    6.58    0.58 
  -3   3   5    6.27    0.47 
  -3   3   5    6.78    0.63 
   3   3  -5    5.85    0.42 
  -3   3   5    6.44    0.61 
   3   3  -5    6.05    0.51 
  -3   3   5    5.95    0.50 
  -3   3   5    5.59    0.52 
   3   3  -5    6.21    0.60 
   3   3  -5    5.50    0.51 
  -3   3   5    5.95    0.50 
  -2  -3   5   74.46    4.77 
   2  -3  -5   76.55    4.77 
   2  -3  -5   92.39   11.52 
  -2  -3   5   81.84    4.92 
   2  -3  -5   70.59    4.80 
   2  -3  -5   81.36    4.80 
  -2  -3   5   69.94    4.78 
  -2  -3   5   66.91    4.84 
  -2  -3   5   75.54    4.84 
   2  -3  -5   74.80    4.75 
  -2  -3   5   76.30    4.89 
   2  -3  -5   79.33    4.89 
   2  -3  -5   79.75    4.98 
   2  -3  -5   70.74    4.81 
  -2  -3   5   80.26    4.79 
  -2  -3   5   74.41    4.80 
  -2   3   5   71.27    4.43 
  -2   3   5   69.85    4.37 
   2   3  -5   60.98   11.20 
  -2   3   5   65.13    4.37 
  -2   3   5   65.46    4.39 
  -2   3   5   74.70    4.49 
  -2   3   5   68.91    4.43 
   2   3  -5   64.81    4.37 
  -2   3   5   58.87    4.32 
   2   3  -5   59.85    4.36 
  -2   3   5   71.63    4.35 
   2   3  -5   75.30    4.34 
  -2   3   5   68.30    4.70 
   2   3  -5   65.03    4.49 
   2   3  -5   69.36    4.45 
  -2   3   5   77.61    4.50 
   2   3  -5   68.99    4.44 
   1  -3  -5    8.86    0.62 
  -1  -3   5    8.37    0.72 
  -1  -3   5    9.01    0.68 
   1  -3  -5    8.50    0.67 
   1  -3  -5   10.04    0.81 
   1  -3  -5    9.80    5.66 
   1  -3  -5    9.19    0.63 
  -1  -3   5    9.14    0.65 
  -1  -3   5    9.49    0.62 
  -1  -3   5    9.21    0.61 
   1  -3  -5    8.97    0.61 
  -1  -3   5   10.50    0.74 
   1  -3  -5    9.03    0.66 
  -1  -3   5    9.40    0.70 
  -1  -3   5    9.05    1.31 
   1   3  -5    7.91    0.62 
   1   3  -5    9.14    0.58 
  -1   3   5    7.69    0.60 
   1   3  -5    8.78    0.67 
  -1   3   5    7.98    1.16 
  -1   3   5    8.58    0.60 
   0  -3  -5   11.89    0.79 
   0  -3  -5   12.29    0.82 
   0  -3   5   12.61    0.83 
   0  -3  -5    9.84    1.32 
   0  -3   5   12.56    0.88 
   0  -3   5    9.72    1.46 
   0  -3   5   12.80    0.80 
   0  -3   5   12.66    0.94 
   0  -3   5   12.72    0.94 
   0  -3   5   11.90    0.79 
   0  -3  -5   12.10    0.86 
   0  -3  -5   12.25    1.00 
   0  -3   5   11.03    0.89 
   0  -3  -5   12.22    0.81 
   0   3  -5   10.47    0.78 
   0   3   5   10.56    0.70 
   0   3   5   11.79    1.50 
   0   3   5   11.20    0.73 
   0   3  -5    9.57    0.73 
  -1  -3  -5   86.59    5.82 
   1  -3   5   90.64    5.56 
  -1  -3  -5   94.61    5.58 
   1  -3   5   82.41    5.62 
  -1  -3  -5   86.39    5.57 
   1  -3   5   89.16    5.73 
   1  -3   5   89.84    5.55 
  -1  -3  -5   82.49    5.58 
   1  -3   5   94.06    5.64 
  -1  -3  -5   92.24    5.66 
  -1  -3  -5   91.95    5.56 
  -1  -3  -5   90.63    5.61 
   1  -3   5   75.22    6.01 
   1   3   5   77.20    5.18 
  -1   3  -5   81.36    5.20 
  -1   3  -5   71.17    5.16 
  -1   3  -5   88.58    5.22 
  -1   3  -5   91.15    5.31 
   1   3   5   84.24    5.18 
   1   3   5   81.98    5.28 
   1   3   5   82.96    5.20 
   1   3   5   77.53    5.18 
  -2  -3  -5   30.64    2.43 
  -2  -3  -5   34.22    2.13 
   2  -3   5   34.38    2.16 
  -2  -3  -5   33.80    2.11 
  -2  -3  -5   33.14    2.18 
   2  -3   5   31.63    2.09 
  -2  -3  -5   32.52    2.14 
   2  -3   5   34.18    2.13 
  -2  -3  -5   33.25    2.12 
  -2  -3  -5   31.54    2.24 
   2  -3   5   31.36    2.21 
   2  -3   5   34.25    2.33 
   2  -3   5   33.77    2.11 
  -2   3  -5   28.68    1.93 
  -2   3  -5   30.02    1.98 
  -2   3  -5   29.58    2.05 
  -2   3  -5   33.09    2.09 
   2   3   5   31.14    1.90 
   2   3   5   29.82    2.11 
   2   3   5   30.28    1.94 
   2   3   5   29.07    1.96 
   2   3   5   29.85    2.00 
  -2   3  -5   28.09    2.03 
   2   3   5   29.68    1.97 
   3  -3   5   61.60    3.82 
  -3  -3  -5   56.73    4.27 
  -3  -3  -5   66.75    3.85 
  -3  -3  -5   59.50    3.94 
   3  -3   5   61.82    4.12 
   3  -3   5   60.12    3.91 
   3  -3   5   58.17    3.84 
  -3  -3  -5   62.08    3.83 
  -3  -3  -5   56.60    3.89 
  -3  -3  -5   58.40    3.99 
   3  -3   5   58.97    3.82 
  -3  -3  -5   64.64    3.88 
  -3   3  -5   49.71    3.78 
  -3   3  -5   55.00    3.76 
   3   3   5   56.98    3.67 
  -3   3  -5   62.04    3.78 
  -3   3  -5   57.31    3.61 
  -3   3  -5   59.88    3.68 
   3   3   5   56.78    3.59 
  -4  -3  -5    4.58    0.40 
  -4  -3  -5    4.60    0.41 
   4  -3   5    4.61    0.34 
  -4  -3  -5    4.37    0.34 
   4  -3   5    4.11    0.33 
   4  -3   5    4.72    0.34 
  -4   3  -5    4.66    0.45 
   4   3   5    3.98    0.39 
  -4   3  -5    3.44    0.45 
  -4   3  -5    3.70    0.40 
   4   3   5    3.94    0.29 
  -4   3  -5    4.29    0.40 
  -4   3  -5    4.11    0.31 
   5  -3   5    6.82    0.50 
  -5  -3  -5    8.22    0.53 
  -5  -3  -5    6.86    0.53 
   5  -3   5    6.67    0.48 
   5  -3   5    7.25    0.50 
   5   3   5    6.66    0.48 
  -5   3  -5    6.33    0.47 
  -5   3  -5    5.81    0.48 
  -6  -4   5    2.20    0.21 
   6  -4  -5    1.91    0.17 
  -6   4   5    1.75    0.22 
  -6   4   5    2.26    0.26 
  -6   4   5    2.03    0.21 
  -6   4   5    2.32    0.22 
   6   4  -5    1.95    0.21 
   5  -4  -5   17.86    1.23 
  -5  -4   5   18.37    1.22 
   5  -4  -5   20.46    1.25 
  -5  -4   5   17.78    1.24 
  -5   4   5   13.68    1.03 
  -5   4   5   13.22    1.11 
  -5   4   5   16.24    1.14 
  -5   4   5   16.15    1.06 
  -5   4   5   13.57    1.08 
   5   4  -5   15.77    1.05 
  -4  -4   5   17.51    1.31 
  -4  -4   5   18.09    1.40 
  -4  -4   5   20.23    1.33 
  -4  -4   5   20.31    1.43 
   4  -4  -5   21.33    1.32 
   4  -4  -5   21.50    1.32 
  -4   4   5   19.21    1.31 
  -4   4   5   18.27    1.38 
  -4   4   5   18.86    1.39 
   4   4  -5   17.72    1.23 
   4   4  -5   17.41    1.28 
  -4   4   5   19.15    1.45 
  -4   4   5   18.05    1.35 
  -4   4   5   18.86    1.28 
   4   4  -5   16.76    1.32 
   3  -4  -5   13.90    1.06 
   3  -4  -5   16.31    1.26 
   3  -4  -5   12.81    1.12 
  -3  -4   5   14.39    1.02 
  -3  -4   5   14.23    0.98 
  -3  -4   5   14.93    0.97 
  -3  -4   5   15.44    1.08 
  -3  -4   5   14.51    1.16 
  -3  -4   5   13.96    1.08 
   3  -4  -5   14.86    0.94 
   3  -4  -5   12.82    0.99 
  -3  -4   5   11.93    1.02 
  -3  -4   5   14.74    0.98 
   3  -4  -5   14.96    0.96 
   3  -4  -5   15.60    0.96 
  -3   4   5   14.15    0.99 
  -3   4   5   15.25    1.15 
   3   4  -5   15.07    1.04 
  -3   4   5   15.90    1.18 
   3   4  -5   14.07    0.96 
   3   4  -5   11.71    1.00 
  -3   4   5   14.99    1.03 
  -3   4   5   15.27    1.10 
  -3   4   5   13.15    1.13 
   3   4  -5   12.42    1.01 
  -3   4   5   13.67    1.04 
   3   4  -5   14.54    1.09 
   2  -4  -5    0.28    0.08 
   2  -4  -5    0.36    0.23 
  -2  -4   5    0.39    0.15 
  -2  -4   5    0.39    0.27 
  -2  -4   5    0.46    0.11 
  -2  -4   5    0.33    0.10 
  -2  -4   5    0.38    0.14 
   2  -4  -5    0.08    0.16 
  -2  -4   5    0.22    0.15 
   2  -4  -5    0.42    0.08 
  -2  -4   5    0.35    0.08 
   2  -4  -5    0.31    0.07 
  -2  -4   5    0.35    0.11 
  -2   4   5    0.43    0.16 
  -2   4   5    0.51    0.23 
  -2   4   5    0.52    0.16 
  -2   4   5    0.33    0.10 
   2   4  -5    0.35    0.12 
  -2   4   5    0.24    0.10 
  -2   4   5    0.49    0.18 
   2   4  -5    0.37    0.14 
  -2   4   5    0.50    0.25 
   2   4  -5    0.28    0.16 
   2   4  -5    0.32    0.14 
  -2   4   5    0.32    0.07 
   2   4  -5    0.47    0.21 
  -1  -4   5  134.41    8.09 
  -1  -4   5  123.66    8.22 
  -1  -4   5  122.08    8.15 
  -1  -4   5  128.74    8.11 
  -1  -4   5  121.59    8.07 
   1  -4  -5  126.93    8.07 
   1  -4  -5  133.45    8.09 
   1  -4  -5  144.05    8.35 
  -1  -4   5  124.53    8.15 
  -1  -4   5  129.95    8.20 
   1  -4  -5  125.18    8.06 
   1   4  -5  115.13    7.06 
   1   4  -5  106.76    7.17 
  -1   4   5  100.24    7.06 
   1   4  -5  106.68    7.03 
  -1   4   5  124.43    7.06 
  -1   4   5  108.40    7.04 
  -1   4   5  114.05    7.06 
  -1   4   5  116.62    7.10 
   1   4  -5  109.02    7.05 
   0  -4   5    0.88    0.20 
   0  -4   5    1.13    0.16 
   0  -4   5    0.94    0.25 
   0  -4  -5    0.91    0.17 
   0  -4  -5    1.10    0.29 
   0  -4  -5    1.08    0.13 
   0  -4   5    1.24    0.23 
   0  -4   5    1.02    0.12 
   0  -4  -5    1.07    0.16 
   0  -4   5    1.03    0.12 
   0   4  -5    1.20    0.17 
   0   4  -5    1.11    0.21 
   0   4  -5    0.95    0.15 
   0   4   5    0.89    0.15 
   0   4   5    1.02    0.18 
   0   4   5    0.97    0.15 
   0   4   5    1.06    0.18 
   0   4   5    1.10    0.28 
   0   4   5    0.94    0.17 
   0   4  -5    0.86    0.26 
   0   4  -5    0.93    0.17 
   1  -4   5   12.34    0.80 
  -1  -4  -5   12.45    0.82 
  -1  -4  -5   11.98    0.80 
   1  -4   5   10.87    0.87 
  -1  -4  -5   13.23    1.04 
   1  -4   5   12.18    1.01 
  -1  -4  -5   11.66    1.10 
  -1  -4  -5   11.50    0.81 
  -1  -4  -5   11.77    0.85 
   1  -4   5   12.65    0.84 
  -1   4  -5   11.70    0.91 
   1   4   5   11.29    0.82 
   1   4   5   10.75    0.77 
   1   4   5   11.31    0.80 
  -1   4  -5   10.08    0.79 
   1   4   5   11.40    0.79 
   1   4   5   11.40    0.82 
  -1   4  -5   11.45    0.82 
   1   4   5   10.77    0.79 
  -1   4  -5   10.38    0.75 
   2  -4   5   24.30    1.74 
  -2  -4  -5   23.10    1.51 
   2  -4   5   23.65    1.49 
  -2  -4  -5   24.20    1.51 
   2  -4   5   22.66    1.47 
  -2  -4  -5   21.37    1.52 
  -2  -4  -5   22.10    1.57 
  -2  -4  -5   23.99    1.50 
  -2  -4  -5   21.58    1.64 
   2  -4   5   24.28    1.54 
  -2  -4  -5   21.61    1.86 
   2   4   5   19.58    1.37 
   2   4   5   20.59    1.40 
  -2   4  -5   18.08    1.45 
   2   4   5   20.18    1.40 
   2   4   5   21.19    1.38 
  -2   4  -5   22.87    1.45 
  -2   4  -5   23.91    1.55 
  -2   4  -5   19.01    1.40 
   2   4   5   21.19    1.40 
   3  -4   5   44.16    3.05 
   3  -4   5   48.83    2.99 
  -3  -4  -5   46.14    3.11 
  -3  -4  -5   47.21    3.04 
   3  -4   5   41.49    2.98 
  -3  -4  -5   53.69    3.03 
  -3  -4  -5   42.31    3.16 
  -3  -4  -5   44.20    3.00 
   3  -4   5   51.74    3.01 
  -3  -4  -5   50.28    3.01 
  -3   4  -5   39.21    2.60 
  -3   4  -5   42.42    2.66 
   3   4   5   37.08    2.59 
   3   4   5   43.18    2.62 
   3   4   5   38.22    2.59 
  -3   4  -5   40.65    2.62 
  -3   4  -5   39.01    2.69 
   4  -4   5    2.22    0.24 
  -4  -4  -5    3.15    0.29 
  -4  -4  -5    3.16    0.36 
   4  -4   5    2.96    0.23 
   4  -4   5    2.48    0.26 
  -4  -4  -5    2.96    0.24 
  -4   4  -5    3.17    0.32 
  -4   4  -5    2.78    0.32 
  -4   4  -5    2.68    0.34 
   4   4   5    3.16    0.32 
  -4   4  -5    2.53    0.36 
  -4   4  -5    3.27    0.38 
  -5  -4  -5    3.52    0.26 
   5  -4   5    3.49    0.23 
   5  -4   5    2.72    0.23 
  -5  -4  -5    2.81    0.30 
  -5   4  -5    3.24    0.25 
  -5   4  -5    2.63    0.27 
  -5   4  -5    2.28    0.23 
   5  -5  -5    7.44    0.52 
   5  -5  -5    7.39    0.53 
  -5  -5   5    8.38    0.58 
  -5  -5   5    7.14    0.53 
  -5   5   5    8.85    0.71 
  -5   5   5    6.97    0.64 
   5   5  -5    8.15    0.62 
   4  -5  -5    6.02    0.46 
  -4  -5   5    5.48    0.45 
  -4  -5   5    5.98    0.45 
  -4  -5   5    5.89    0.51 
  -4  -5   5    5.96    0.44 
   4  -5  -5    5.98    0.42 
  -4   5   5    5.81    0.49 
  -4   5   5    5.40    0.50 
   4   5  -5    4.54    0.41 
  -4   5   5    6.18    0.59 
  -4   5   5    5.61    0.55 
  -4   5   5    5.79    0.55 
   4   5  -5    5.11    0.47 
  -3  -5   5   31.74    2.13 
   3  -5  -5   32.60    2.04 
  -3  -5   5   31.84    2.08 
  -3  -5   5   30.20    2.18 
  -3  -5   5   32.52    2.08 
  -3  -5   5   32.99    2.07 
   3  -5  -5   31.47    2.05 
   3  -5  -5   31.87    2.05 
   3   5  -5   29.30    1.94 
  -3   5   5   25.23    1.93 
  -3   5   5   32.27    2.05 
  -3   5   5   31.40    1.97 
  -3   5   5   31.97    2.12 
  -3   5   5   29.34    1.98 
  -3   5   5   28.03    2.02 
   3   5  -5   25.03    1.94 
  -3   5   5   29.21    2.13 
   3   5  -5   28.96    1.95 
  -3   5   5   31.02    1.95 
   2  -5  -5    2.67    0.23 
   2  -5  -5    2.48    0.22 
  -2  -5   5    2.47    0.25 
  -2  -5   5    2.57    0.25 
  -2  -5   5    2.41    0.46 
  -2  -5   5    2.56    0.28 
   2  -5  -5    2.64    0.21 
  -2  -5   5    1.80    0.33 
   2  -5  -5    2.03    0.47 
  -2  -5   5    2.66    0.24 
  -2   5   5    2.56    0.36 
  -2   5   5    2.55    0.31 
   2   5  -5    2.38    0.30 
  -2   5   5    2.37    0.32 
   2   5  -5    2.27    0.28 
   2   5  -5    2.04    0.38 
   2   5  -5    2.14    0.30 
  -2   5   5    2.64    0.30 
  -2   5   5    2.28    0.34 
  -2   5   5    2.68    0.41 
  -2   5   5    2.50    0.27 
   2   5  -5    2.46    0.30 
  -1  -5   5    3.47    0.33 
   1  -5  -5    3.92    0.56 
  -1  -5   5    3.67    0.31 
   1  -5  -5    3.95    0.31 
   1  -5  -5    3.91    0.30 
   1  -5  -5    3.78    0.28 
  -1  -5   5    3.46    0.47 
  -1  -5   5    3.66    0.29 
  -1  -5   5    3.65    0.52 
  -1  -5   5    2.76    0.46 
  -1  -5   5    4.19    0.32 
  -1  -5   5    3.41    0.38 
   1   5  -5    3.22    0.40 
   1   5  -5    3.24    0.33 
  -1   5   5    3.32    0.31 
  -1   5   5    3.78    0.45 
  -1   5   5    3.88    0.47 
   1   5  -5    2.92    0.44 
  -1   5   5    3.35    0.51 
  -1   5   5    3.26    0.32 
   1   5  -5    3.20    0.33 
  -1   5   5    3.13    0.33 
  -1   5   5    2.78    0.24 
   1   5  -5    3.36    0.33 
  -1   5   5    2.78    0.47 
   0  -5   5   14.67    0.93 
   0  -5   5   15.26    0.95 
   0  -5   5   14.12    0.98 
   0  -5  -5   13.24    0.98 
   0  -5  -5   13.76    0.95 
   0  -5  -5   13.76    1.25 
   0  -5   5   14.29    1.16 
   0  -5   5   15.01    1.04 
   0  -5  -5   14.29    0.94 
   0  -5   5   13.39    1.09 
   0  -5   5   13.76    1.06 
   0  -5  -5   14.47    0.95 
   0   5   5   13.17    0.96 
   0   5  -5   13.29    0.92 
   0   5  -5   10.83    0.87 
   0   5  -5   12.13    0.92 
   0   5   5   12.84    0.90 
   0   5  -5   12.51    1.08 
   0   5   5   12.29    0.90 
   0   5  -5   11.47    0.85 
   0   5   5   14.85    1.00 
   0   5   5   12.85    0.86 
  -1  -5  -5   19.55    1.26 
   1  -5   5   19.05    1.23 
  -1  -5  -5   18.91    1.33 
  -1  -5  -5   18.66    1.25 
   1  -5   5   22.24    1.57 
  -1  -5  -5   19.01    1.69 
   1  -5   5   18.95    1.22 
  -1  -5  -5   15.99    1.25 
   1  -5   5   20.22    1.28 
   1  -5   5   20.07    1.34 
  -1  -5  -5   16.82    1.39 
  -1  -5  -5   19.02    1.24 
  -1   5  -5   17.26    1.18 
  -1   5  -5   17.10    1.29 
   1   5   5   16.95    1.12 
   1   5   5   17.46    1.18 
  -1   5  -5   16.45    1.16 
   1   5   5   17.20    1.15 
   1   5   5   16.87    1.17 
  -1   5  -5   15.62    1.16 
   1   5   5   16.55    1.19 
   1   5   5   16.05    1.15 
  -1   5  -5   15.27    1.14 
  -2  -5  -5   85.44    5.88 
   2  -5   5   91.95    5.83 
  -2  -5  -5   95.85    5.95 
  -2  -5  -5   94.88    5.87 
   2  -5   5   95.28    5.85 
  -2  -5  -5   96.31    5.87 
  -2  -5  -5   85.45    6.02 
   2  -5   5   93.49    5.89 
  -2  -5  -5   96.61    5.86 
   2   5   5   85.68    5.37 
  -2   5  -5   91.13    5.42 
  -2   5  -5   92.90    5.53 
   2   5   5   87.73    5.36 
  -2   5  -5   83.91    5.38 
   2   5   5   75.44    5.35 
   2   5   5   75.36    5.36 
   2   5   5   77.85    5.39 
  -2   5  -5   88.43    5.38 
  -3  -5  -5    4.75    0.39 
  -3  -5  -5    4.89    0.42 
  -3  -5  -5    4.66    0.38 
   3  -5   5    5.22    0.35 
  -3  -5  -5    5.01    0.38 
  -3   5  -5    4.38    0.41 
  -3   5  -5    4.80    0.45 
   3   5   5    4.84    0.42 
  -3   5  -5    4.94    0.43 
  -3   5  -5    5.33    0.53 
   3   5   5    4.23    0.41 
   4  -5   5    6.76    0.44 
   4  -5   5    5.92    0.45 
  -4  -5  -5    6.61    0.48 
  -4  -5  -5    6.25    0.46 
   4   5   5    7.20    0.55 
  -4   5  -5    6.63    0.55 
  -5  -6   5    1.91    0.18 
  -5   6   5    1.56    0.19 
   5   6  -5    1.68    0.17 
  -5   6   5    1.53    0.21 
  -5   6   5    1.59    0.17 
  -5   6   5    1.59    0.18 
   4  -6  -5   15.31    1.06 
  -4  -6   5   16.56    1.07 
  -4  -6   5   15.14    1.06 
  -4  -6   5   15.66    1.07 
   4  -6  -5   17.33    1.06 
  -4  -6   5   16.58    1.11 
  -4   6   5   14.73    1.14 
  -4   6   5   15.50    1.06 
  -4   6   5   14.76    1.04 
  -4   6   5   14.52    1.08 
   4   6  -5   15.70    1.03 
  -3  -6   5    9.16    0.65 
   3  -6  -5    8.15    0.65 
  -3  -6   5    9.89    0.65 
  -3  -6   5    8.90    0.65 
   3  -6  -5    9.12    0.61 
  -3   6   5    8.51    0.71 
  -3   6   5    7.30    0.63 
  -3   6   5    8.93    0.67 
  -3   6   5    8.37    0.76 
   3   6  -5    7.92    0.63 
  -3   6   5    8.07    0.66 
  -3   6   5    8.76    0.66 
   3   6  -5    7.47    0.64 
   3   6  -5    9.03    0.63 
  -2  -6   5   14.08    0.94 
   2  -6  -5   13.28    0.99 
  -2  -6   5   13.86    0.92 
  -2  -6   5   13.62    0.97 
   2  -6  -5   13.68    0.91 
   2  -6  -5   13.92    0.91 
   2  -6  -5   13.31    0.89 
  -2  -6   5   12.73    0.93 
   2   6  -5   12.23    0.85 
  -2   6   5   12.22    1.02 
   2   6  -5   11.78    0.85 
  -2   6   5   11.90    0.90 
  -2   6   5   13.21    0.91 
  -2   6   5   12.41    0.89 
   2   6  -5   11.06    0.89 
  -2   6   5   11.21    0.84 
  -2   6   5   12.44    0.90 
   2   6  -5   11.91    0.89 
  -2   6   5   13.30    0.98 
  -1  -6   5   12.40    0.78 
   1  -6  -5   11.57    0.76 
   1  -6  -5   10.65    0.79 
  -1  -6   5   10.59    0.78 
  -1  -6   5   11.52    0.82 
   1  -6  -5   11.31    0.77 
  -1  -6   5   11.74    0.79 
   1   6  -5   10.03    0.74 
  -1   6   5   10.69    0.91 
  -1   6   5    9.26    0.74 
  -1   6   5   10.67    0.78 
   1   6  -5    9.82    0.70 
  -1   6   5   10.29    0.83 
   1   6  -5   10.30    0.78 
   1   6  -5    9.54    0.76 
  -1   6   5   11.26    0.79 
  -1   6   5    9.52    0.75 
  -1   6   5   10.16    0.74 
   0  -6   5    9.20    0.62 
   0  -6  -5    8.74    0.61 
   0  -6  -5    8.32    0.62 
   0  -6   5    8.53    0.60 
   0  -6  -5    8.97    0.62 
   0  -6   5    9.25    0.65 
   0  -6  -5    8.68    0.66 
   0   6   5    7.57    0.60 
   0   6  -5    7.53    0.60 
   0   6  -5    7.65    0.61 
   0   6   5    7.82    0.62 
   0   6   5    8.16    0.63 
   0   6  -5    8.24    0.63 
   0   6   5    7.83    0.66 
   0   6   5    7.75    0.60 
   0   6   5    7.55    0.72 
   0   6   5    6.95    0.51 
   0   6  -5    7.78    0.62 
   0   6   5    7.65    0.60 
   0   6  -5    7.21    0.73 
  -1  -6  -5   12.86    0.81 
  -1  -6  -5   12.24    0.82 
  -1  -6  -5   10.49    0.86 
   1  -6   5   11.51    0.83 
   1  -6   5   12.72    0.79 
   1  -6   5   13.14    0.81 
  -1  -6  -5   11.62    0.82 
   1  -6   5   11.63    0.90 
   1  -6   5   10.80    0.91 
   1   6   5   10.86    0.80 
   1   6   5   10.30    0.82 
   1   6   5   10.15    0.80 
  -1   6  -5   10.60    0.79 
   1   6   5   10.48    0.79 
  -1   6  -5   10.86    0.80 
  -1   6  -5   10.89    0.92 
   1   6   5   10.76    0.73 
  -1   6  -5   11.03    0.80 
  -1   6  -5    9.18    0.76 
   1   6   5   11.54    0.80 
   1   6   5   10.99    0.79 
  -2  -6  -5   16.72    1.22 
  -2  -6  -5   18.21    1.22 
   2  -6   5   18.56    1.19 
  -2  -6  -5   18.91    1.22 
   2  -6   5   18.94    1.21 
  -2  -6  -5   19.73    1.30 
   2  -6   5   18.33    1.30 
  -2   6  -5   14.65    1.08 
  -2   6  -5   15.36    1.10 
   2   6   5   17.52    1.08 
   2   6   5   14.89    1.12 
   2   6   5   14.69    1.09 
  -2   6  -5   17.62    1.12 
   2   6   5   16.07    1.10 
  -2   6  -5   16.04    1.23 
  -2   6  -5   16.80    1.13 
  -3  -6  -5    6.14    0.46 
   3  -6   5    6.16    0.43 
  -3  -6  -5    6.14    0.46 
   3  -6   5    5.97    0.55 
   3  -6   5    7.14    0.48 
  -3  -6  -5    6.24    0.47 
  -3  -6  -5    6.68    0.46 
  -3   6  -5    6.39    0.49 
   3   6   5    6.52    0.48 
  -3   6  -5    6.37    0.50 
  -3   6  -5    6.30    0.51 
  -4  -6  -5    4.14    0.29 
  -4   6  -5    4.97    0.39 
   4   6   5    5.18    0.37 
  -4   6  -5    4.79    0.43 
  -4   6  -5    5.64    0.40 
  -4  -7   5    8.22    0.56 
  -4  -7   5    7.09    0.53 
  -4  -7   5    7.87    0.53 
   4   7  -5    5.43    0.39 
  -4   7   5    4.19    0.40 
  -4   7   5    4.25    0.37 
  -3  -7   5    8.22    0.59 
  -3  -7   5    8.50    0.58 
  -3   7   5    8.31    0.65 
   3   7  -5    6.83    0.57 
  -3   7   5    7.82    0.56 
  -3   7   5    8.02    0.56 
   3   7  -5    6.25    0.57 
  -3   7   5    6.07    0.55 
   3   7  -5    6.88    0.53 
  -3   7   5    7.59    0.62 
  -2  -7   5    4.71    0.37 
  -2  -7   5    4.35    0.36 
   2  -7  -5    4.76    0.35 
   2  -7  -5    4.47    0.33 
  -2  -7   5    4.73    0.36 
  -2   7   5    4.34    0.37 
   2   7  -5    4.16    0.38 
  -2   7   5    4.09    0.34 
  -2   7   5    4.22    0.39 
   2   7  -5    3.56    0.38 
   2   7  -5    4.39    0.35 
   2   7  -5    3.77    0.40 
  -2   7   5    4.30    0.47 
  -2   7   5    4.33    0.44 
  -1  -7   5    1.12    0.20 
  -1  -7   5    0.99    0.15 
   1  -7  -5    1.13    0.14 
  -1  -7   5    1.01    0.14 
   1  -7  -5    1.12    0.14 
  -1   7   5    1.04    0.19 
   1   7  -5    0.79    0.18 
   1   7  -5    0.99    0.19 
  -1   7   5    1.04    0.21 
  -1   7   5    0.90    0.27 
   1   7  -5    0.98    0.20 
  -1   7   5    0.81    0.22 
  -1   7   5    1.06    0.22 
   1   7  -5    0.90    0.20 
   0  -7  -5    3.30    0.30 
   0  -7   5    3.56    0.30 
   0  -7   5    3.78    0.31 
   0  -7  -5    4.68    0.35 
   0  -7  -5    4.06    0.30 
   0   7   5    3.20    0.35 
   0   7   5    3.66    0.39 
   0   7   5    2.91    0.40 
   0   7  -5    3.33    0.32 
   0   7   5    3.19    0.35 
   0   7  -5    3.39    0.35 
   0   7   5    3.84    0.34 
   0   7  -5    3.22    0.32 
   0   7  -5    3.18    0.34 
  -1  -7  -5   18.79    1.18 
  -1  -7  -5   17.79    1.18 
  -1  -7  -5   18.61    1.19 
   1  -7   5   18.36    1.18 
   1  -7   5   16.03    1.18 
  -1   7  -5   15.92    1.00 
  -1   7  -5   14.46    1.00 
   1   7   5   13.82    1.00 
  -1   7  -5   13.31    1.09 
   1   7   5   13.73    1.00 
  -1   7  -5   13.93    1.00 
  -2  -7  -5   10.77    0.73 
   2  -7   5   10.71    0.71 
  -2  -7  -5   11.18    0.72 
  -2  -7  -5   10.33    0.73 
   2  -7   5   10.24    0.72 
  -2   7  -5    8.70    0.70 
  -2   7  -5    8.05    0.55 
  -2   7  -5    8.83    0.68 
   2   7   5    6.52    0.59 
  -2   7  -5    7.52    0.60 
  -2   7  -5    8.49    0.60 
   2   7   5    7.30    0.58 
   2   7   5    7.57    0.59 
  -3  -7  -5    5.50    0.39 
  -3  -7  -5    5.73    0.40 
  -3   7  -5    5.95    0.38 
  -3   7  -5    5.58    0.48 
  -3   7  -5    4.86    0.41 
   3   7   5    5.09    0.40 
  -3   7  -5    5.68    0.39 
  -3  -8   5    9.59    0.65 
  -3  -8   5   10.11    0.67 
   3   8  -5    6.91    0.49 
   3   8  -5    6.28    0.48 
  -3   8   5    7.36    0.51 
  -2  -8   5   13.69    0.84 
  -2  -8   5   11.06    0.84 
  -2  -8   5   13.47    0.85 
  -2   8   5    8.45    0.64 
  -2   8   5    9.03    0.69 
   2   8  -5    9.76    0.66 
  -1  -8   5    2.05    0.19 
  -1  -8   5    2.60    0.23 
  -1  -8   5    2.80    0.23 
   1  -8  -5    2.36    0.20 
  -1   8   5    1.55    0.23 
  -1   8   5    1.36    0.23 
  -1   8   5    2.07    0.22 
   1   8  -5    2.04    0.23 
   1   8  -5    1.64    0.22 
  -1   8   5    1.56    0.22 
   1   8  -5    1.99    0.21 
   0  -8   5   21.61    1.39 
   0  -8  -5   20.29    1.40 
   0  -8  -5   23.01    1.39 
   0  -8   5   20.80    1.38 
   0   8   5   20.99    1.22 
   0   8   5   16.23    1.22 
   0   8  -5   15.24    1.22 
   0   8   5   20.69    1.28 
   0   8  -5   16.14    1.23 
   0   8   5   20.85    1.25 
  -1  -8  -5    7.39    0.54 
  -1  -8  -5    8.10    0.53 
  -1  -8  -5    7.44    0.52 
   1   8   5    5.54    0.45 
   1   8   5    6.19    0.48 
  -1   8  -5    5.38    0.44 
  -1   8  -5    7.16    0.47 
  -2  -8  -5    0.11    0.05 
  -2  -8  -5    0.10    0.06 
  -2   8  -5    0.19    0.07 
  -2   8  -5    0.09    0.08 
   2   8   5    0.03    0.08 
   2   8   5    0.25    0.09 
  -2   8  -5    0.08    0.09 
   6   0  -6    8.31    0.57 
   6   0  -6    8.20    0.57 
   6   0  -6    8.24    0.58 
  -6   0   6    9.50    0.63 
  -6   0   6    7.54    0.69 
   5   0  -6   -0.06    0.14 
   5   0  -6    0.07    0.12 
   5   0  -6    0.01    0.09 
  -5   0   6    0.02    0.11 
   5   0  -6    0.04    0.08 
   5   0  -6    0.08    0.08 
  -5   0   6    0.05    0.13 
  -4   0   6   34.57    2.45 
   4   0  -6   37.62    2.54 
   4   0  -6   33.54    2.31 
   4   0  -6   34.53    2.35 
  -4   0   6   35.10    2.44 
  -4   0   6   30.87    2.34 
  -4   0   6   38.87    2.51 
   4   0  -6   35.24    2.41 
   4   0  -6   35.62    2.30 
   4   0  -6   40.99    2.42 
   4   0  -6   37.34    2.38 
  -4   0   6   35.99    2.35 
  -4   0   6   38.49    2.52 
   4   0  -6   36.49    2.34 
  -4   0   6   34.43    2.31 
  -4   0   6   37.37    2.34 
  -4   0   6   33.09    2.48 
  -3   0   6    0.10    0.08 
   3   0  -6    0.05    0.09 
   3   0  -6    0.05    0.06 
   3   0  -6    0.04    0.05 
   3   0  -6    0.15    0.16 
  -3   0   6   -0.03    0.13 
  -3   0   6    0.07    0.11 
   3   0  -6    0.07    0.06 
   3   0  -6    0.00    0.12 
  -3   0   6   -0.09    0.15 
  -3   0   6    0.01    0.13 
  -3   0   6   -0.02    0.14 
  -3   0   6    0.04    0.09 
   3   0  -6    0.04    0.09 
   3   0  -6   -0.05    0.07 
   2   0  -6  123.54    7.95 
   2   0  -6  126.46    7.86 
   2   0  -6  145.66   12.43 
  -2   0   6  123.77    8.26 
   2   0  -6  137.25    7.99 
   2   0  -6  131.50    7.89 
  -2   0   6  114.57    7.92 
   2   0  -6  103.79   13.03 
  -2   0   6  127.91    7.87 
  -2   0   6  130.60    7.89 
  -2   0   6  108.73    8.35 
  -2   0   6  130.88    7.98 
   2   0  -6  119.20    7.85 
   2   0  -6  113.83    7.84 
   2   0  -6  117.41    7.89 
  -2   0   6  139.86    7.92 
   1   0  -6   19.68    1.41 
   1   0  -6   21.17    1.48 
  -1   0   6   19.97    1.88 
   1   0  -6   20.56    1.38 
  -1   0   6   24.28    1.50 
   1   0  -6   24.99    4.56 
  -1   0   6   21.21    1.79 
  -1   0   6   21.90    1.44 
  -1   0   6   21.18    1.41 
  -1   0   6   20.19    1.36 
   1   0  -6   25.15    5.58 
   1   0  -6   22.26    1.47 
   1   0  -6   21.94    1.41 
  -1   0   6   21.91    1.42 
  -1   0   6   20.59    1.42 
   1   0  -6   21.55    1.38 
   1   0  -6   20.38    1.46 
   1   0  -6   19.96    1.36 
  -1   0   6   22.66    1.49 
   0   0  -6  139.60    8.95 
   0   0  -6  154.91   13.26 
   0   0  -6  161.49    9.09 
   0   0  -6  124.69    9.05 
   0   0   6  134.58    9.30 
   0   0   6  130.82    9.03 
   0   0   6  141.96   12.90 
   0   0  -6  144.60    8.97 
   0   0   6  144.48    9.01 
   0   0   6  147.92    9.01 
   0   0   6  131.87    8.94 
   0   0   6  134.63    8.98 
   0   0   6  164.39    8.97 
   0   0  -6  149.78    8.99 
  -1   0  -6    7.95    0.61 
  -1   0  -6    8.07    0.58 
  -1   0  -6    7.12    0.53 
  -1   0  -6    7.63    8.43 
  -1   0  -6    7.07    0.50 
   1   0   6    7.32    0.56 
   1   0   6    8.85    1.31 
   1   0   6    7.79    0.51 
  -1   0  -6    6.52    0.65 
   1   0   6    7.72    0.59 
  -1   0  -6    6.51    0.50 
   1   0   6   14.24    5.88 
  -1   0  -6    8.75    0.60 
   1   0   6    7.43    0.64 
  -1   0  -6    6.50    1.15 
   1   0   6    7.42    0.50 
  -1   0  -6    7.99    0.58 
   2   0   6    2.74    0.22 
   2   0   6    2.92    0.23 
  -2   0  -6    2.50    0.45 
   2   0   6    3.13    0.42 
  -2   0  -6    2.70    0.29 
  -2   0  -6    2.71    0.27 
  -2   0  -6    2.63    0.31 
   2   0   6    3.07    0.23 
  -2   0  -6    2.60    0.29 
   2   0   6    2.82    0.23 
   2   0   6    2.62    0.34 
   3   0   6   79.83    4.97 
  -3   0  -6   78.00    5.03 
   3   0   6   84.56    4.98 
   3   0   6   79.27    5.14 
   3   0   6   84.79    4.98 
   3   0   6   77.77    5.07 
  -3   0  -6   72.04    5.04 
  -3   0  -6   74.95    5.03 
  -3   0  -6   78.23    5.01 
  -4   0  -6   30.87    1.95 
   4   0   6   29.67    1.91 
   4   0   6   32.87    1.91 
  -4   0  -6   30.15    1.98 
  -4   0  -6   26.64    2.30 
   4   0   6   25.70    2.12 
   4   0   6   30.80    1.91 
   5   0   6    0.66    0.11 
  -5   0  -6    0.93    0.17 
   5   0   6    0.66    0.09 
  -6  -1   6    3.21    0.37 
  -6  -1   6    3.80    0.35 
   6  -1  -6    3.80    0.29 
   6  -1  -6    3.91    0.28 
  -6   1   6    3.70    0.33 
   6   1  -6    3.38    0.27 
   6   1  -6    2.77    0.25 
  -6   1   6    3.43    0.40 
  -6   1   6    3.87    0.31 
   5  -1  -6    2.93    0.27 
   5  -1  -6    2.76    0.28 
   5  -1  -6    3.43    0.51 
  -5  -1   6    2.81    0.36 
   5  -1  -6    2.84    0.32 
   5   1  -6    2.70    0.26 
   5   1  -6    3.71    0.44 
  -5   1   6    2.58    0.39 
   5   1  -6    2.92    0.38 
  -5   1   6    3.27    0.33 
  -5   1   6    2.86    0.32 
  -5   1   6    1.92    0.47 
   4  -1  -6    0.47    0.11 
   4  -1  -6    0.95    0.24 
  -4  -1   6    1.14    0.37 
   4  -1  -6    0.59    0.14 
   4  -1  -6    0.78    0.14 
   4  -1  -6    0.64    0.12 
  -4  -1   6    0.49    0.14 
   4  -1  -6    0.56    0.14 
  -4  -1   6    0.79    0.17 
  -4  -1   6    0.89    0.30 
  -4  -1   6    0.72    0.12 
  -4  -1   6    0.35    0.25 
   4  -1  -6    0.46    0.21 
   4  -1  -6    0.58    0.19 
  -4  -1   6    0.76    0.25 
  -4   1   6    0.15    0.14 
  -4   1   6    0.71    0.21 
  -4   1   6    0.89    0.29 
  -4   1   6    0.68    0.17 
   4   1  -6    0.61    0.20 
   4   1  -6    0.83    0.13 
  -4   1   6    0.79    0.24 
   4   1  -6    0.78    0.16 
   4   1  -6    0.70    0.27 
   4   1  -6    0.49    0.11 
  -4   1   6    0.62    0.24 
   4   1  -6    0.38    0.12 
   4   1  -6    0.61    0.16 
  -4   1   6    0.76    0.26 
  -4   1   6    0.70    0.24 
   3  -1  -6    0.33    0.09 
   3  -1  -6    0.28    0.08 
  -3  -1   6    0.43    0.09 
  -3  -1   6    0.19    0.06 
  -3  -1   6    0.46    0.18 
  -3  -1   6   -0.11    0.11 
  -3  -1   6    0.43    0.18 
  -3  -1   6    0.27    0.18 
   3  -1  -6    0.29    0.16 
   3  -1  -6    0.31    0.18 
   3  -1  -6    0.33    0.09 
  -3  -1   6    0.29    0.12 
   3  -1  -6    0.19    0.09 
   3  -1  -6    0.19    0.11 
  -3  -1   6    0.22    0.15 
  -3   1   6    0.29    0.12 
  -3   1   6    0.32    0.18 
   3   1  -6    0.28    0.09 
   3   1  -6    0.25    0.08 
  -3   1   6    0.26    0.08 
  -3   1   6    0.24    0.16 
  -3   1   6    0.31    0.12 
   3   1  -6    0.35    0.18 
  -3   1   6    0.44    0.18 
  -3   1   6    0.25    0.11 
   3   1  -6    0.31    0.11 
   3   1  -6    0.46    0.18 
   3   1  -6    0.30    0.13 
   3   1  -6    0.30    0.08 
  -3   1   6    0.38    0.21 
   3   1  -6    0.16    0.07 
  -3   1   6    0.24    0.08 
  -2  -1   6    8.33    1.44 
   2  -1  -6   12.70    0.95 
   2  -1  -6   12.87    0.84 
  -2  -1   6   11.73    0.86 
   2  -1  -6   11.78    0.88 
   2  -1  -6   12.98    0.94 
  -2  -1   6   15.54    1.62 
  -2  -1   6   11.54    0.92 
  -2  -1   6   12.31    0.83 
  -2  -1   6   13.32    0.89 
   2  -1  -6    6.41    7.23 
  -2  -1   6   13.42    0.97 
   2  -1  -6   12.82    0.84 
   2  -1  -6   12.29    0.82 
   2  -1  -6   12.58    0.87 
  -2  -1   6   13.31    0.96 
   2  -1  -6   19.38    6.70 
   2   1  -6   13.35    0.96 
  -2   1   6   12.70    0.84 
   2   1  -6   11.41    0.82 
   2   1  -6   11.28    0.80 
   2   1  -6   12.19    0.92 
  -2   1   6   12.99    0.90 
   2   1  -6   11.59    0.81 
   2   1  -6   13.37    0.86 
  -2   1   6   11.61    0.90 
  -2   1   6   12.73    0.94 
  -2   1   6   12.45    1.48 
   2   1  -6   16.88    7.23 
   2   1  -6   11.87    0.86 
   2   1  -6   17.19    6.62 
  -2   1   6   10.66    1.59 
  -1  -1   6   92.04    6.21 
   1  -1  -6  110.14    6.43 
  -1  -1   6  104.99    6.30 
  -1  -1   6   95.37    6.26 
  -1  -1   6  104.01    6.24 
   1  -1  -6   95.31    6.18 
   1  -1  -6   96.50    6.22 
  -1  -1   6   96.52    6.25 
  -1  -1   6  105.93    6.19 
   1  -1  -6   85.86    9.45 
   1  -1  -6   99.47    6.32 
  -1  -1   6   97.81    6.19 
   1  -1  -6   93.29    6.20 
  -1  -1   6   97.82    6.56 
   1  -1  -6   97.77    6.19 
  -1  -1   6   90.25    6.66 
   1  -1  -6   92.55   10.44 
   1  -1  -6   94.54    6.23 
  -1  -1   6  104.79    6.30 
   1   1  -6   92.71    5.74 
  -1   1   6   95.14    6.04 
  -1   1   6   81.36    6.09 
  -1   1   6   95.13    5.72 
   1   1  -6   87.12    5.72 
   1   1  -6   82.86    5.66 
   1   1  -6   87.70    5.69 
   1   1  -6   89.27    5.77 
   1   1  -6   83.42    9.41 
   1   1  -6   95.27   10.44 
  -1   1   6   98.06    5.80 
  -1   1   6   89.36    5.71 
   1   1  -6   96.92    5.71 
   1   1  -6   87.12    5.79 
   0  -1   6   10.93    0.75 
   0  -1  -6   11.95    0.88 
   0  -1   6   10.59    0.71 
   0  -1   6   10.81    1.27 
   0  -1  -6    9.82    0.71 
   0  -1  -6   10.43    0.76 
   0  -1   6   10.71    0.72 
   0  -1  -6   10.94    0.74 
   0  -1  -6    9.81    1.25 
   0  -1  -6   11.28    0.77 
   0  -1  -6    0.46    4.85 
   0  -1   6   12.13    0.80 
   0  -1   6   10.46    0.82 
   0  -1  -6   10.82    0.73 
   0  -1   6   11.27    0.78 
   0   1  -6   11.43    0.74 
   0   1   6    8.71    1.27 
   0   1   6   10.06    0.77 
   0   1  -6   10.58    0.78 
   0   1  -6   10.57    0.72 
   0   1   6   10.23    0.75 
   0   1   6   10.64    4.97 
   0   1  -6   11.85    0.81 
   0   1   6   11.98    0.79 
   0   1   6   10.64    0.75 
   0   1   6    9.52    0.73 
   0   1  -6    3.63    5.05 
   0   1   6    8.94    0.68 
   1  -1   6    2.10    6.29 
  -1  -1  -6   14.12    0.96 
   1  -1   6   13.27    0.90 
   1  -1   6   14.91    0.91 
  -1  -1  -6   13.69    1.74 
   1  -1   6   12.88    0.95 
  -1  -1  -6    7.06    8.73 
  -1  -1  -6   14.41    0.92 
   1  -1   6   14.78    1.07 
  -1  -1  -6   12.53    0.92 
  -1  -1  -6   13.75    1.11 
   1  -1   6   14.48    0.99 
  -1  -1  -6   13.07    0.91 
  -1  -1  -6   14.72    0.99 
  -1  -1  -6   14.94    0.96 
  -1   1  -6   12.16    0.91 
  -1   1  -6   12.48    1.54 
   1   1   6   13.12    0.90 
   1   1   6    9.21    6.14 
   1   1   6   13.10    0.90 
   1   1   6   13.53    0.93 
  -1   1  -6   12.48    0.86 
  -1   1  -6   11.04    0.96 
  -1   1  -6   13.19    0.90 
   1   1   6   14.22    1.84 
  -1   1  -6   13.10    0.88 
   1   1   6   13.54    0.84 
  -1   1  -6   10.92    8.54 
   1   1   6   12.94    0.86 
   1   1   6   12.99    0.97 
   2  -1   6    9.96    0.63 
  -2  -1  -6    9.42    0.66 
   2  -1   6   10.27    0.78 
   2  -1   6    9.77    0.63 
  -2  -1  -6    8.01    0.63 
   2  -1   6   10.57    0.88 
  -2  -1  -6    9.04    0.67 
  -2  -1  -6   10.26    0.71 
  -2  -1  -6    9.92    0.64 
  -2  -1  -6    8.19    0.67 
  -2  -1  -6    8.47    0.68 
  -2  -1  -6    9.58    0.74 
  -2  -1  -6    8.70    0.62 
  -2  -1  -6    8.23    0.88 
   2  -1   6    9.42    0.70 
   2   1   6    9.44    1.03 
   2   1   6    9.31    0.62 
   2   1   6    8.01    0.67 
   2   1   6    8.94    0.62 
  -2   1  -6    8.86    0.66 
   2   1   6    8.59    0.70 
  -2   1  -6    8.63    0.73 
  -2   1  -6    9.91    0.78 
   2   1   6    9.62    0.62 
  -2   1  -6    9.49    0.65 
  -2   1  -6    8.87    0.68 
   2   1   6    9.95    0.61 
   2   1   6    9.49    0.74 
  -2   1  -6    8.19    0.76 
  -2   1  -6    9.27    0.67 
   3  -1   6   13.88    0.92 
  -3  -1  -6   14.44    1.13 
  -3  -1  -6   13.38    0.92 
  -3  -1  -6   12.81    0.99 
   3  -1   6   14.97    1.26 
   3  -1   6   16.34    1.09 
   3  -1   6   14.06    0.93 
  -3  -1  -6   11.17    1.64 
   3  -1   6   13.47    1.08 
  -3  -1  -6   14.64    1.07 
   3  -1   6   14.82    0.98 
   3   1   6   12.57    0.85 
   3   1   6   14.98    1.21 
   3   1   6   14.21    0.86 
  -3   1  -6   12.14    0.93 
  -3   1  -6   13.82    1.06 
  -3   1  -6   10.92    1.06 
   3   1   6   13.04    0.99 
  -3   1  -6   13.45    0.91 
   3   1   6   16.04    1.31 
   3   1   6   12.01    0.85 
  -3   1  -6   11.06    0.99 
   4  -1   6   45.89    3.11 
   4  -1   6   48.49    3.11 
   4  -1   6   49.88    3.11 
  -4  -1  -6   48.15    3.16 
  -4  -1  -6   52.42    3.15 
   4   1   6   45.07    3.11 
  -4   1  -6   53.28    3.16 
   4   1   6   53.96    3.46 
  -4   1  -6   47.91    3.17 
   4   1   6   48.38    3.11 
   4   1   6   47.65    3.11 
   4   1   6   46.92    3.27 
  -4   1  -6   50.42    3.15 
   5  -1   6   20.70    1.28 
   5  -1   6   16.92    1.29 
  -5  -1  -6   20.31    1.31 
  -5  -1  -6   21.71    1.32 
   5   1   6   20.46    1.33 
  -5   1  -6   20.92    1.35 
   6  -2  -6    1.79    0.17 
  -6  -2   6    1.58    0.22 
   6  -2  -6    1.93    0.18 
  -6  -2   6    1.94    0.24 
  -6   2   6    1.99    0.23 
  -6   2   6    1.50    0.22 
   6   2  -6    2.21    0.24 
  -6   2   6    1.75    0.28 
   5  -2  -6   15.04    0.95 
  -5  -2   6   13.19    1.01 
   5  -2  -6   14.94    0.98 
  -5  -2   6   13.20    0.90 
  -5  -2   6   12.24    1.02 
   5  -2  -6   14.30    0.94 
   5   2  -6   11.89    0.95 
  -5   2   6   13.63    0.92 
   5   2  -6   14.03    0.88 
   5   2  -6   11.45    0.95 
  -5   2   6   13.78    1.04 
  -5   2   6   13.85    0.96 
  -5   2   6   13.21    1.01 
  -5   2   6   12.94    0.95 
   4  -2  -6    2.85    0.27 
  -4  -2   6    2.28    0.33 
   4  -2  -6    2.32    0.32 
  -4  -2   6    2.43    0.36 
   4  -2  -6    2.11    0.31 
  -4  -2   6    2.80    0.52 
  -4  -2   6    2.63    0.24 
   4  -2  -6    2.43    0.24 
   4  -2  -6    2.42    0.27 
   4  -2  -6    3.33    0.73 
  -4  -2   6    2.83    0.41 
   4  -2  -6    2.38    0.24 
  -4   2   6    2.37    0.27 
   4   2  -6    2.30    0.33 
  -4   2   6    2.86    0.41 
  -4   2   6    2.25    0.32 
   4   2  -6    2.44    0.50 
   4   2  -6    2.48    0.23 
   4   2  -6    2.37    0.30 
  -4   2   6    2.31    0.35 
   4   2  -6    2.11    0.30 
  -4   2   6    2.31    0.30 
  -4   2   6    2.58    0.40 
  -3  -2   6   31.96    2.06 
  -3  -2   6   25.87    1.88 
   3  -2  -6   28.25    1.93 
   3  -2  -6   28.31    1.89 
   3  -2  -6   28.16    1.93 
  -3  -2   6   27.44    1.87 
   3  -2  -6   29.55    1.88 
  -3  -2   6   29.32    1.89 
   3  -2  -6   30.28    2.00 
  -3  -2   6   29.94    1.93 
   3  -2  -6   27.19    1.90 
  -3  -2   6   31.86    1.97 
   3  -2  -6   29.51    1.89 
  -3  -2   6   31.38    2.07 
   3   2  -6   25.99    1.82 
  -3   2   6   27.64    1.88 
   3   2  -6   30.83    1.89 
   3   2  -6   25.16    1.82 
   3   2  -6   28.14    1.83 
  -3   2   6   31.88    2.15 
  -3   2   6   28.29    1.86 
  -3   2   6   28.52    1.99 
  -3   2   6   29.32    2.01 
   3   2  -6   32.85    1.98 
   3   2  -6   24.79    1.90 
  -3   2   6   25.90    1.87 
  -3   2   6   30.40    2.01 
   3   2  -6   30.08    1.97 
  -3   2   6   31.27    1.99 
  -3   2   6   29.13    1.90 
   3   2  -6   26.21    1.85 
   2  -2  -6   44.03    2.88 
   2  -2  -6   44.74    2.76 
   2  -2  -6   44.23    2.76 
  -2  -2   6   42.31    3.47 
  -2  -2   6   46.68    2.91 
  -2  -2   6   40.63    2.76 
   2  -2  -6   45.15    2.81 
   2  -2  -6   45.52    2.95 
  -2  -2   6   40.91    2.75 
  -2  -2   6   41.95    2.79 
   2  -2  -6   44.35    2.75 
   2  -2  -6   41.87    2.79 
  -2  -2   6   41.36    2.76 
  -2  -2   6   40.01    2.84 
  -2  -2   6   45.62    2.92 
  -2  -2   6   36.69    3.86 
  -2  -2   6   46.06    2.83 
  -2   2   6   42.39    2.63 
   2   2  -6   42.53    2.72 
   2   2  -6   41.02    2.66 
  -2   2   6   40.65    2.66 
   2   2  -6   38.73    2.61 
   2   2  -6   44.06    2.64 
  -2   2   6   42.42    2.70 
   2   2  -6   38.70    2.78 
   2   2  -6   33.73   10.79 
   2   2  -6   36.82   10.60 
  -2   2   6   36.28    2.58 
  -2   2   6   43.87    2.74 
  -2   2   6   41.47    2.69 
  -2   2   6   34.93    2.63 
   2   2  -6   42.89    2.75 
  -2   2   6   43.34    2.74 
  -1  -2   6   53.00    3.37 
   1  -2  -6   55.23    3.55 
  -1  -2   6   52.18    3.85 
  -1  -2   6   53.27    3.41 
   1  -2  -6   52.47    3.39 
   1  -2  -6   53.18    3.42 
  -1  -2   6   52.92    3.44 
   1  -2  -6   54.11    3.37 
   1  -2  -6   40.69    8.08 
  -1  -2   6   50.33    3.45 
  -1  -2   6   54.39    3.38 
  -1  -2   6   53.36    3.50 
  -1  -2   6   50.47    5.02 
  -1  -2   6   56.60    3.50 
   1  -2  -6   54.43    3.38 
  -1   2   6   54.27    3.24 
   1   2  -6   54.17    3.24 
  -1   2   6   38.93    4.06 
  -1   2   6   49.32    3.15 
   1   2  -6   50.46    3.18 
   1   2  -6   44.16    7.28 
  -1   2   6   43.28    3.18 
  -1   2   6   51.17    3.16 
   1   2  -6   44.56    3.18 
   1   2  -6   40.99    8.88 
   1   2  -6   53.27    3.15 
   0  -2  -6   22.26    1.51 
   0  -2   6   23.82    1.59 
   0  -2   6   22.97    1.47 
   0  -2   6   23.66    1.56 
   0  -2   6   23.72    1.48 
   0  -2  -6   22.22    1.49 
   0  -2  -6   22.12    1.48 
   0  -2   6   24.49    1.55 
   0  -2  -6   21.77    8.00 
   0  -2  -6   23.53    1.54 
   0  -2   6   27.25    2.61 
   0  -2  -6   21.18    1.65 
   0  -2   6   24.76    1.62 
   0  -2  -6   19.76    2.02 
   0   2  -6   20.16    6.44 
   0   2  -6   21.03    6.15 
   0   2  -6   23.75    1.45 
   0   2   6   18.17    6.26 
   0   2   6   21.45    2.10 
   0   2   6   21.85    1.44 
   0   2  -6   20.99    1.45 
   0   2   6   22.23    1.49 
   0   2   6   21.32    1.46 
   0   2  -6   22.19    1.51 
  -1  -2  -6   14.14    1.05 
  -1  -2  -6   15.35    0.99 
   1  -2   6   15.70    0.97 
  -1  -2  -6   14.25    1.01 
  -1  -2  -6   13.63    0.98 
   1  -2   6   14.79    1.05 
  -1  -2  -6   14.13    1.19 
  -1  -2  -6   17.18    2.09 
   1  -2   6   14.13    0.96 
  -1  -2  -6   14.21    0.97 
   1  -2   6   15.22    1.14 
  -1  -2  -6   14.79    0.98 
   1  -2   6   17.12    1.06 
  -1   2  -6   13.70    0.91 
   1   2   6   14.12    0.87 
   1   2   6   12.13    0.95 
   1   2   6   14.60    0.92 
   1   2   6   11.67    0.95 
  -1   2  -6   12.48    0.92 
   1   2   6   13.52    0.91 
  -1   2  -6   13.82    1.02 
  -1   2  -6   13.78    0.89 
   1   2   6   14.88    1.02 
   1   2   6   15.58    2.34 
  -1   2  -6   12.97    0.99 
   1   2   6   12.99    1.01 
  -1   2  -6   13.28    0.94 
   1   2   6   12.38    0.92 
   2  -2   6   52.73    3.07 
   2  -2   6   44.99    3.22 
  -2  -2  -6   42.45    3.12 
  -2  -2  -6   42.52    3.21 
   2  -2   6   52.27    3.14 
  -2  -2  -6   51.39    3.08 
   2  -2   6   48.14    3.06 
  -2  -2  -6   49.79    3.08 
   2  -2   6   47.98    3.06 
  -2  -2  -6   48.17    3.10 
  -2  -2  -6   47.92    3.41 
  -2  -2  -6   49.04    3.07 
   2  -2   6   50.34    3.30 
  -2  -2  -6   47.93    3.19 
  -2   2  -6   47.86    3.03 
  -2   2  -6   42.99    2.93 
   2   2   6   45.86    2.98 
  -2   2  -6   41.50    3.00 
   2   2   6   44.73    2.89 
  -2   2  -6   46.09    3.02 
  -2   2  -6   44.36    2.90 
   2   2   6   44.38    3.08 
   2   2   6   42.99    2.92 
   2   2   6   51.39    2.87 
   3  -2   6   88.00    5.38 
   3  -2   6   98.96    5.72 
  -3  -2  -6   74.63    5.50 
   3  -2   6   83.26    5.37 
  -3  -2  -6   86.14    5.42 
   3  -2   6   87.71    5.37 
  -3  -2  -6   76.84    5.89 
   3  -2   6   97.17    5.85 
  -3  -2  -6   84.29    5.38 
   3  -2   6   82.94    5.46 
  -3  -2  -6   79.66    5.43 
   3   2   6   87.25    5.43 
   3   2   6   78.74    5.20 
  -3   2  -6   81.33    5.09 
   3   2   6   77.05    5.12 
  -3   2  -6   74.02    5.12 
   3   2   6   86.43    5.05 
  -3   2  -6   78.93    5.20 
  -3   2  -6   78.29    5.23 
   4  -2   6   18.85    1.25 
   4  -2   6   20.00    1.25 
  -4  -2  -6   16.80    1.22 
   4  -2   6   20.37    1.25 
  -4  -2  -6   20.35    1.30 
  -4  -2  -6   18.87    1.31 
  -4   2  -6   19.57    1.24 
   4   2   6   18.55    1.28 
  -4   2  -6   17.29    1.31 
  -4   2  -6   19.23    1.28 
   4   2   6   18.37    1.20 
  -5  -2  -6    9.25    0.62 
  -5  -2  -6    8.77    0.62 
   5  -2   6    8.49    0.58 
   5  -2   6    8.39    0.58 
   5   2   6    7.33    0.47 
  -5   2  -6    6.66    0.54 
  -5   2  -6    7.42    0.52 
   5   2   6    7.18    0.53 
   6  -3  -6    1.79    0.16 
  -6  -3   6    1.76    0.22 
   6  -3  -6    1.64    0.16 
   6   3  -6    1.84    0.22 
  -6   3   6    1.98    0.26 
  -6   3   6    1.74    0.26 
  -6   3   6    1.41    0.19 
   5  -3  -6    1.93    0.22 
  -5  -3   6    1.53    0.17 
   5  -3  -6    1.68    0.18 
  -5  -3   6    1.69    0.27 
   5  -3  -6    1.52    0.19 
  -5   3   6    1.49    0.33 
   5   3  -6    1.56    0.15 
   5   3  -6    1.56    0.24 
  -5   3   6    1.95    0.26 
  -5   3   6    1.47    0.28 
  -5   3   6    1.47    0.25 
   4  -3  -6    3.65    0.31 
   4  -3  -6    3.16    0.29 
   4  -3  -6    3.54    0.30 
  -4  -3   6    3.43    0.39 
  -4  -3   6    3.40    0.29 
  -4  -3   6    3.48    0.40 
  -4  -3   6    3.79    0.42 
  -4  -3   6    3.60    0.44 
  -4  -3   6    3.81    0.32 
   4  -3  -6    3.44    0.30 
  -4   3   6    3.78    0.49 
  -4   3   6    3.69    0.38 
   4   3  -6    4.02    0.38 
   4   3  -6    3.41    0.28 
  -4   3   6    3.44    0.31 
  -4   3   6    3.59    0.41 
   4   3  -6    3.14    0.37 
  -4   3   6    4.03    0.47 
  -4   3   6    3.51    0.45 
   4   3  -6    3.19    0.34 
   4   3  -6    3.52    0.42 
   3  -3  -6    6.20    0.69 
  -3  -3   6    6.78    0.56 
   3  -3  -6    6.58    0.46 
   3  -3  -6    5.92    0.62 
   3  -3  -6    5.79    0.45 
  -3  -3   6    6.33    0.47 
   3  -3  -6    6.06    0.51 
  -3  -3   6    5.55    0.46 
   3  -3  -6    6.16    0.57 
   3  -3  -6    5.95    0.44 
  -3  -3   6    6.41    0.51 
  -3  -3   6    6.01    0.45 
  -3  -3   6    5.57    0.56 
  -3  -3   6    5.95    0.63 
  -3  -3   6    6.42    0.61 
   3  -3  -6    6.50    0.46 
   3   3  -6    5.48    0.42 
  -3   3   6    5.82    0.47 
   3   3  -6    6.11    0.48 
  -3   3   6    6.05    0.51 
  -3   3   6    5.05    0.45 
   3   3  -6    6.14    0.57 
  -3   3   6    6.31    0.62 
  -3   3   6    5.93    0.50 
  -3   3   6    6.23    0.56 
  -3   3   6    6.55    0.58 
  -3   3   6    6.27    0.60 
   3   3  -6    5.43    0.51 
   3   3  -6    6.81    0.53 
   3   3  -6    5.42    0.61 
  -2  -3   6    2.99    0.27 
   2  -3  -6    3.21    0.25 
   2  -3  -6    3.74    0.33 
   2  -3  -6    3.90    0.51 
   2  -3  -6    3.21    0.38 
  -2  -3   6    2.80    0.40 
   2  -3  -6    2.69    0.29 
   2  -3  -6    3.01    0.26 
  -2  -3   6    2.81    0.26 
  -2  -3   6    2.75    0.36 
  -2  -3   6    2.96    0.29 
   2  -3  -6    3.33    0.33 
  -2  -3   6    2.76    0.25 
  -2  -3   6    3.17    0.39 
  -2  -3   6    3.03    0.34 
   2   3  -6    2.87    0.35 
   2   3  -6    2.90    0.26 
  -2   3   6    3.06    0.28 
   2   3  -6    2.55    0.29 
  -2   3   6    2.65    0.31 
  -2   3   6    2.94    0.34 
   2   3  -6    2.61    0.41 
  -2   3   6    2.81    0.29 
   2   3  -6    2.98    0.31 
  -2   3   6    2.99    0.31 
  -2   3   6    3.19    0.40 
  -2   3   6    2.78    0.37 
  -2   3   6    2.87    0.34 
  -2   3   6    2.51    0.27 
   1  -3  -6   64.08    4.36 
  -1  -3   6   60.02    4.16 
  -1  -3   6   72.90    4.23 
   1  -3  -6   66.39    4.19 
   1  -3  -6   65.09    4.21 
   1  -3  -6   61.62    4.14 
   1  -3  -6   63.91    4.16 
  -1  -3   6   64.61    4.23 
  -1  -3   6   65.92    4.15 
  -1  -3   6   71.91    4.30 
  -1  -3   6   74.23    4.24 
  -1  -3   6   63.97    4.24 
  -1  -3   6   61.08    4.28 
  -1   3   6   58.33    3.81 
   1   3  -6   51.68    3.71 
   1   3  -6   62.59    4.02 
   1   3  -6   63.83    3.68 
   1   3  -6   62.07    3.79 
  -1   3   6   55.11    3.71 
  -1   3   6   53.52    3.71 
  -1   3   6   59.55    3.71 
  -1   3   6   54.81    3.75 
   0  -3   6   22.35    1.56 
   0  -3   6   22.32    1.53 
   0  -3   6   23.78    1.49 
   0  -3  -6   25.62    1.55 
   0  -3   6   24.00    1.58 
   0  -3  -6   23.70    1.73 
   0  -3  -6   23.09    1.48 
   0  -3   6   22.59    1.48 
   0  -3   6   22.43    1.60 
   0  -3  -6   21.70    1.51 
   0  -3   6   22.62    1.64 
   0  -3  -6   22.76    1.56 
   0   3   6   18.43    1.40 
   0   3   6   20.81    1.39 
   0   3   6   22.49    1.39 
   0   3  -6   22.15    1.43 
   0   3   6   19.89    1.35 
   0   3  -6   19.61    1.39 
   0   3  -6   20.33    1.37 
   1  -3   6   35.08    2.39 
   1  -3   6   37.39    2.35 
  -1  -3  -6   32.95    2.32 
  -1  -3  -6   36.42    2.32 
  -1  -3  -6   34.92    2.41 
  -1  -3  -6   37.21    2.32 
   1  -3   6   33.88    2.30 
  -1  -3  -6   38.52    2.68 
   1  -3   6   38.94    2.31 
  -1  -3  -6   36.69    2.36 
   1   3   6   30.59    2.14 
   1   3   6   33.35    2.17 
   1   3   6   30.98    2.25 
  -1   3  -6   36.87    2.19 
  -1   3  -6   33.13    2.16 
   1   3   6   33.51    2.14 
   1   3   6   31.80    2.14 
  -1   3  -6   35.46    2.28 
   1   3   6   30.64    2.25 
  -2  -3  -6   33.52    2.35 
   2  -3   6   35.62    2.19 
  -2  -3  -6   32.75    2.23 
   2  -3   6   36.48    2.21 
   2  -3   6   34.50    2.27 
   2  -3   6   35.74    2.46 
   2  -3   6   31.95    2.20 
  -2  -3  -6   34.27    2.22 
  -2  -3  -6   37.43    2.23 
  -2  -3  -6   32.86    2.57 
   2  -3   6   32.99    2.33 
  -2  -3  -6   33.68    2.29 
  -2  -3  -6   35.68    2.21 
   2   3   6   31.18    2.00 
  -2   3  -6   28.98    2.10 
   2   3   6   31.80    2.20 
  -2   3  -6   32.75    2.07 
  -2   3  -6   30.03    2.07 
  -2   3  -6   30.27    2.14 
   2   3   6   30.79    2.07 
   2   3   6   30.77    1.96 
  -3  -3  -6    5.45    0.44 
   3  -3   6    6.17    0.51 
  -3  -3  -6    5.59    0.60 
   3  -3   6    5.97    0.48 
  -3  -3  -6    5.61    0.51 
  -3  -3  -6    6.83    0.46 
   3  -3   6    6.17    0.44 
   3  -3   6    6.32    0.44 
  -3  -3  -6    6.35    0.50 
  -3   3  -6    5.56    0.57 
  -3   3  -6    5.64    0.44 
   3   3   6    5.87    0.50 
  -3   3  -6    5.79    0.58 
  -3   3  -6    6.32    0.52 
  -3   3  -6    6.36    0.54 
   3   3   6    5.64    0.40 
  -4  -3  -6    7.23    0.52 
  -4  -3  -6    6.79    0.53 
  -4  -3  -6    6.19    0.46 
   4  -3   6    6.80    0.47 
   4  -3   6    6.47    0.47 
   4  -3   6    6.74    0.47 
   4   3   6    6.14    0.41 
  -4   3  -6    5.01    0.54 
  -4   3  -6    6.05    0.54 
  -4   3  -6    5.58    0.50 
   4   3   6    6.33    0.50 
  -4   3  -6    6.38    0.50 
  -5  -3  -6    4.10    0.31 
   5  -3   6    3.82    0.29 
   5  -3   6    3.99    0.29 
  -5  -3  -6    4.44    0.33 
   5   3   6    3.83    0.32 
  -5   3  -6    4.13    0.35 
  -6  -4   6    4.12    0.37 
   6  -4  -6    4.36    0.31 
  -6   4   6    3.42    0.28 
  -6   4   6    3.78    0.27 
   6   4  -6    3.52    0.28 
  -6   4   6    2.70    0.31 
   5  -4  -6    2.20    0.21 
  -5  -4   6    2.82    0.30 
  -5  -4   6    2.08    0.21 
   5  -4  -6    2.36    0.22 
  -5   4   6    2.17    0.27 
  -5   4   6    1.57    0.30 
  -5   4   6    1.83    0.30 
   5   4  -6    1.80    0.25 
  -5   4   6    2.12    0.26 
   4  -4  -6    1.18    0.16 
  -4  -4   6    1.25    0.25 
   4  -4  -6    1.29    0.18 
   4  -4  -6    1.45    0.17 
  -4  -4   6    0.90    0.24 
  -4  -4   6    1.30    0.16 
  -4  -4   6    1.06    0.20 
  -4  -4   6    1.22    0.20 
   4   4  -6    0.97    0.23 
  -4   4   6    1.38    0.34 
  -4   4   6    0.78    0.34 
  -4   4   6    1.30    0.35 
  -4   4   6    1.62    0.32 
  -4   4   6    1.26    0.32 
   4   4  -6    1.55    0.34 
   4   4  -6    1.35    0.19 
  -4   4   6    1.29    0.25 
   3  -4  -6   14.32    1.26 
  -3  -4   6   13.39    1.09 
   3  -4  -6   14.35    1.02 
   3  -4  -6   12.81    1.37 
  -3  -4   6   16.28    1.19 
  -3  -4   6   13.48    1.07 
   3  -4  -6   15.97    0.98 
  -3  -4   6   13.88    1.17 
  -3  -4   6   12.93    1.05 
  -3  -4   6   14.44    1.00 
   3  -4  -6   14.95    0.98 
   3  -4  -6   12.92    1.07 
  -3  -4   6   14.71    0.98 
   3  -4  -6   14.99    0.95 
  -3  -4   6   14.69    0.97 
  -3   4   6   12.11    1.02 
  -3   4   6   14.63    1.13 
   3   4  -6   11.89    0.96 
   3   4  -6   11.71    0.99 
  -3   4   6   13.16    0.96 
  -3   4   6   11.87    0.86 
  -3   4   6   14.31    1.04 
   3   4  -6   13.34    0.97 
  -3   4   6   13.03    1.00 
  -3   4   6   13.81    0.97 
   3   4  -6   14.39    1.07 
  -3   4   6   14.24    1.10 
  -2  -4   6    2.10    0.21 
   2  -4  -6    2.17    0.19 
   2  -4  -6    2.15    0.30 
  -2  -4   6    1.38    0.25 
   2  -4  -6    2.50    0.44 
  -2  -4   6    1.99    0.37 
  -2  -4   6    1.75    0.22 
  -2  -4   6    1.91    0.29 
   2  -4  -6    1.93    0.20 
  -2  -4   6    1.91    0.21 
  -2  -4   6    2.14    0.25 
  -2  -4   6    1.87    0.31 
   2  -4  -6    2.19    0.21 
  -2   4   6    1.60    0.22 
  -2   4   6    2.05    0.30 
   2   4  -6    1.81    0.21 
  -2   4   6    2.10    0.36 
  -2   4   6    2.06    0.26 
  -2   4   6    1.89    0.37 
   2   4  -6    1.66    0.36 
   2   4  -6    1.77    0.27 
   2   4  -6    1.72    0.17 
   2   4  -6    1.81    0.26 
   2   4  -6    1.71    0.30 
  -2   4   6    1.59    0.19 
  -2   4   6    1.94    0.26 
  -2   4   6    1.96    0.28 
  -1  -4   6   10.29    0.80 
  -1  -4   6    9.40    0.85 
  -1  -4   6    9.03    0.67 
   1  -4  -6    9.54    0.67 
   1  -4  -6    8.89    0.74 
   1  -4  -6   10.33    0.69 
  -1  -4   6   10.23    0.81 
   1  -4  -6    9.79    0.72 
  -1  -4   6   10.04    0.67 
   1  -4  -6    9.64    0.66 
  -1  -4   6    9.09    0.82 
  -1  -4   6   10.46    0.68 
   1  -4  -6    9.85    0.92 
  -1  -4   6    9.53    0.71 
  -1   4   6    8.99    0.65 
  -1   4   6    8.73    0.67 
   1   4  -6    8.94    0.67 
   1   4  -6    8.03    0.64 
   1   4  -6    8.44    0.64 
   1   4  -6    8.63    0.78 
  -1   4   6    7.99    0.61 
   1   4  -6    9.65    0.73 
  -1   4   6    9.17    0.70 
   1   4  -6    8.12    0.63 
  -1   4   6    8.97    0.65 
  -1   4   6    7.90    0.62 
   0  -4  -6   11.42    0.87 
   0  -4  -6    8.97    0.67 
   0  -4   6    9.41    0.68 
   0  -4  -6    9.10    0.64 
   0  -4  -6    9.00    0.65 
   0  -4   6    8.48    0.71 
   0  -4   6    8.05    0.77 
   0  -4   6    8.47    0.64 
   0  -4  -6    9.75    0.65 
   0  -4   6    9.62    0.63 
   0  -4   6    9.66    0.64 
   0  -4   6    9.76    0.84 
   0  -4  -6   10.39    0.93 
   0  -4   6   10.27    0.77 
   0   4  -6    8.10    0.74 
   0   4   6    7.93    0.59 
   0   4  -6    8.82    0.63 
   0   4   6    7.84    0.61 
   0   4  -6    8.17    0.62 
   0   4   6    7.74    0.61 
   0   4   6    8.48    0.64 
   0   4   6    8.71    0.62 
   0   4  -6    8.42    0.67 
   0   4  -6    7.59    0.60 
   0   4  -6    7.42    0.60 
   0   4   6    8.30    0.65 
  -1  -4  -6    7.75    0.54 
   1  -4   6    7.71    0.74 
   1  -4   6    8.30    0.64 
  -1  -4  -6    7.30    0.58 
  -1  -4  -6    7.72    0.54 
  -1  -4  -6    6.49    0.53 
  -1  -4  -6    7.32    0.52 
   1  -4   6    7.56    0.50 
  -1  -4  -6    7.31    0.65 
   1  -4   6    7.47    0.56 
  -1  -4  -6    6.92    0.81 
   1  -4   6    7.64    0.52 
   1  -4   6    6.48    0.51 
   1   4   6    6.22    0.53 
  -1   4  -6    6.98    0.55 
   1   4   6    6.87    0.54 
   1   4   6    6.15    0.50 
  -1   4  -6    6.29    0.54 
  -1   4  -6    6.16    0.54 
  -2  -4  -6   56.52    3.47 
  -2  -4  -6   51.34    3.54 
  -2  -4  -6   56.75    3.46 
   2  -4   6   49.11    3.44 
  -2  -4  -6   52.44    3.62 
   2  -4   6   56.88    3.45 
   2  -4   6   53.10    3.51 
   2  -4   6   55.17    3.44 
  -2  -4  -6   54.83    3.47 
  -2  -4  -6   49.60    3.47 
  -2  -4  -6   65.39    4.62 
  -2   4  -6   53.66    3.28 
  -2   4  -6   50.69    3.25 
   2   4   6   44.97    3.20 
  -2   4  -6   50.80    3.37 
  -2   4  -6   49.25    3.19 
   2   4   6   50.35    3.23 
   2   4   6   50.83    3.24 
  -3  -4  -6    0.85    0.15 
   3  -4   6    0.84    0.12 
   3  -4   6    0.67    0.11 
  -3  -4  -6    0.86    0.16 
  -3  -4  -6    0.62    0.12 
   3  -4   6    0.70    0.12 
  -3  -4  -6    0.65    0.13 
  -3  -4  -6    0.69    0.27 
   3  -4   6    0.71    0.16 
  -3   4  -6    0.92    0.23 
  -3   4  -6    0.77    0.25 
  -3   4  -6    0.63    0.18 
  -3   4  -6    0.80    0.22 
   4  -4   6    4.17    0.31 
  -4  -4  -6    4.06    0.37 
  -4  -4  -6    4.66    0.36 
   4  -4   6    4.36    0.32 
  -4  -4  -6    4.43    0.33 
   4  -4   6    4.38    0.31 
  -4   4  -6    4.93    0.39 
  -4   4  -6    4.21    0.43 
  -4   4  -6    3.99    0.38 
  -4   4  -6    4.28    0.35 
  -5   4  -6   14.41    0.87 
   5   4   6   14.03    0.90 
  -5   4  -6   11.36    0.86 
  -5  -5   6    2.61    0.22 
  -5  -5   6    2.00    0.20 
   5  -5  -6    2.32    0.19 
  -5   5   6    1.30    0.24 
  -5   5   6    1.04    0.20 
  -5   5   6    1.65    0.20 
  -4  -5   6    0.73    0.20 
  -4  -5   6    0.77    0.13 
  -4  -5   6    0.94    0.16 
   4  -5  -6    0.96    0.14 
   4  -5  -6    0.97    0.15 
  -4   5   6    0.49    0.21 
   4   5  -6    0.57    0.14 
  -4   5   6    0.67    0.22 
   4   5  -6    0.86    0.13 
  -4   5   6    1.03    0.29 
  -4   5   6    0.73    0.20 
  -4   5   6    0.55    0.16 
  -3  -5   6    0.08    0.08 
  -3  -5   6    0.22    0.10 
   3  -5  -6    0.11    0.18 
  -3  -5   6    0.12    0.09 
   3  -5  -6    0.23    0.08 
   3  -5  -6    0.22    0.19 
  -3  -5   6    0.15    0.14 
  -3  -5   6   -0.19    0.16 
   3  -5  -6    0.23    0.07 
   3  -5  -6    0.12    0.07 
  -3   5   6    0.15    0.14 
  -3   5   6    0.14    0.16 
   3   5  -6    0.23    0.13 
  -3   5   6    0.16    0.13 
  -3   5   6    0.24    0.18 
  -3   5   6    0.15    0.24 
  -3   5   6    0.49    0.27 
  -3   5   6    0.25    0.16 
   3   5  -6    0.10    0.12 
  -3   5   6    0.42    0.21 
  -2  -5   6   17.37    1.13 
  -2  -5   6   16.82    1.13 
   2  -5  -6   16.05    1.14 
   2  -5  -6   17.49    1.19 
  -2  -5   6   17.72    1.12 
   2  -5  -6   17.38    1.09 
  -2  -5   6   19.94    1.66 
  -2  -5   6   16.84    1.17 
  -2  -5   6   15.40    1.19 
  -2  -5   6   15.92    1.31 
   2  -5  -6   14.34    1.13 
  -2  -5   6   16.36    1.32 
   2   5  -6   17.90    1.13 
  -2   5   6   16.71    1.11 
  -2   5   6   14.80    1.12 
  -2   5   6   16.65    1.18 
  -2   5   6   16.21    1.12 
   2   5  -6   14.76    1.08 
  -2   5   6   15.40    1.09 
   2   5  -6   13.68    1.05 
  -2   5   6   16.51    1.26 
  -2   5   6   12.69    1.03 
  -1  -5   6    1.45    0.18 
   1  -5  -6    1.26    0.17 
  -1  -5   6    1.21    0.15 
  -1  -5   6    1.14    0.25 
  -1  -5   6    1.43    0.18 
   1  -5  -6    1.10    0.18 
  -1  -5   6    1.25    0.25 
  -1  -5   6    0.82    0.33 
  -1  -5   6    1.23    0.24 
   1  -5  -6    1.15    0.15 
  -1   5   6    1.17    0.20 
  -1   5   6    1.03    0.15 
  -1   5   6    1.51    0.25 
  -1   5   6    1.15    0.23 
   1   5  -6    1.03    0.20 
  -1   5   6    1.31    0.34 
   1   5  -6    1.15    0.33 
  -1   5   6    1.21    0.26 
   1   5  -6    1.34    0.21 
  -1   5   6    1.26    0.32 
   1   5  -6    1.32    0.26 
   1   5  -6    1.29    0.23 
   1   5  -6    1.11    0.22 
   0  -5   6   26.53    2.15 
   0  -5  -6   30.89    2.00 
   0  -5  -6   33.25    2.03 
   0  -5   6   31.48    2.15 
   0  -5   6   31.23    2.10 
   0  -5  -6   30.21    2.01 
   0  -5   6   32.08    2.00 
   0  -5   6   32.27    2.01 
   0  -5  -6   34.88    2.49 
   0  -5  -6   28.73    2.11 
   0  -5   6   29.97    2.09 
   0  -5   6   32.48    2.30 
   0   5   6   27.01    1.79 
   0   5   6   29.76    1.87 
   0   5   6   28.44    1.84 
   0   5  -6   28.11    1.99 
   0   5   6   28.06    1.89 
   0   5  -6   26.41    1.83 
   0   5   6   26.08    1.82 
   0   5  -6   28.42    1.85 
   0   5  -6   25.43    1.79 
  -1  -5  -6   10.31    0.99 
  -1  -5  -6   11.63    0.89 
  -1  -5  -6   13.07    0.85 
   1  -5   6   12.68    0.81 
   1  -5   6   10.27    0.82 
  -1  -5  -6   12.96    0.84 
   1  -5   6   13.37    0.94 
   1  -5   6   12.15    0.87 
   1  -5   6   12.44    0.82 
  -1  -5  -6   12.66    0.83 
   1   5   6   11.07    0.81 
   1   5   6   10.72    0.81 
   1   5   6   11.22    0.81 
   1   5   6   11.37    0.79 
  -1   5  -6   10.75    0.81 
   1   5   6   10.72    0.84 
  -1   5  -6   11.49    0.96 
   1   5   6   11.36    0.83 
  -1   5  -6   11.09    0.83 
  -1   5  -6   11.62    0.83 
  -1   5  -6   10.13    0.73 
  -1   5  -6   12.02    0.84 
  -2  -5  -6    1.14    0.17 
   2  -5   6    1.19    0.14 
  -2  -5  -6    0.86    0.19 
   2  -5   6    0.82    0.15 
   2  -5   6    1.46    0.19 
  -2  -5  -6    1.27    0.21 
  -2  -5  -6    0.91    0.17 
   2  -5   6    1.59    0.40 
  -2  -5  -6    1.58    0.37 
  -2  -5  -6    1.55    0.35 
  -2   5  -6    1.54    0.35 
   2   5   6    1.57    0.29 
   2   5   6    1.52    0.31 
  -2   5  -6    1.26    0.30 
  -2   5  -6    1.48    0.31 
  -3  -5  -6    1.46    0.19 
   3  -5   6    1.46    0.15 
  -3  -5  -6    1.64    0.20 
   3  -5   6    2.03    0.21 
  -3  -5  -6    1.49    0.19 
  -3  -5  -6    1.34    0.17 
   3  -5   6    1.26    0.17 
   3   5   6    1.52    0.22 
  -3   5  -6    1.28    0.21 
  -3   5  -6    1.64    0.24 
  -3   5  -6    1.30    0.22 
  -3   5  -6    1.36    0.29 
  -4  -5  -6    4.99    0.37 
  -4  -5  -6    5.36    0.39 
   4  -5   6    5.60    0.37 
   4   5   6    4.26    0.35 
  -4   5  -6    4.42    0.42 
   4   5   6    5.56    0.38 
  -4   5  -6    5.01    0.38 
  -4   5  -6    4.47    0.37 
  -5  -6   6    3.73    0.26 
  -5   6   6    3.35    0.30 
  -5   6   6    3.09    0.27 
   4  -6  -6    5.08    0.40 
  -4  -6   6    5.68    0.42 
  -4  -6   6    5.63    0.45 
   4  -6  -6    5.75    0.40 
  -4  -6   6    5.70    0.46 
   4   6  -6    4.11    0.38 
  -4   6   6    4.51    0.40 
  -4   6   6    4.97    0.41 
  -4   6   6    4.09    0.49 
  -4   6   6    5.06    0.47 
   3  -6  -6    1.53    0.17 
  -3  -6   6    1.47    0.19 
   3  -6  -6    1.72    0.17 
  -3  -6   6    1.63    0.21 
  -3  -6   6    1.94    0.24 
   3   6  -6    1.40    0.20 
  -3   6   6    1.33    0.27 
   3   6  -6    1.49    0.20 
  -3   6   6    1.37    0.24 
   3   6  -6    1.27    0.21 
  -3   6   6    1.21    0.22 
  -3   6   6    1.22    0.30 
  -3   6   6    1.06    0.22 
  -2  -6   6    8.87    0.65 
   2  -6  -6    9.35    0.71 
  -2  -6   6    9.17    0.65 
  -2  -6   6    9.27    0.66 
   2  -6  -6    9.64    0.64 
   2  -6  -6    9.25    0.62 
  -2  -6   6    8.61    0.69 
   2  -6  -6    8.30    0.65 
   2   6  -6    8.62    0.62 
  -2   6   6    8.10    0.65 
  -2   6   6    6.90    0.57 
  -2   6   6    8.64    0.72 
   2   6  -6    8.29    0.65 
  -2   6   6    7.97    0.77 
  -2   6   6    8.17    0.64 
   2   6  -6    7.98    0.64 
  -2   6   6    8.16    0.65 
   2   6  -6    7.92    0.59 
  -2   6   6    7.69    0.64 
  -1  -6   6   14.45    1.10 
   1  -6  -6   17.05    1.08 
  -1  -6   6   16.33    1.12 
  -1  -6   6   17.28    1.10 
   1  -6  -6   13.89    1.09 
   1  -6  -6   16.91    1.07 
  -1  -6   6   17.26    1.08 
  -1   6   6   14.34    1.04 
  -1   6   6   12.71    1.15 
   1   6  -6   16.27    1.07 
   1   6  -6   13.48    1.08 
  -1   6   6   15.46    1.11 
  -1   6   6   17.21    1.08 
  -1   6   6   13.45    1.00 
   1   6  -6   15.22    0.99 
   1   6  -6   15.06    1.05 
  -1   6   6   15.24    1.05 
   1   6  -6   14.45    1.02 
   1   6  -6   12.33    1.14 
   0  -6   6    6.58    0.63 
   0  -6  -6    6.71    0.58 
   0  -6   6    8.16    0.52 
   0  -6  -6    7.74    0.53 
   0  -6  -6    7.37    0.54 
   0  -6  -6    8.11    0.60 
   0  -6   6    6.14    0.57 
   0  -6   6    7.99    0.54 
   0   6   6    7.35    0.57 
   0   6  -6    6.78    0.55 
   0   6   6    6.73    0.55 
   0   6   6    6.09    0.65 
   0   6  -6    7.03    0.57 
   0   6   6    6.94    0.55 
   0   6   6    6.64    0.59 
   0   6  -6    5.63    0.66 
   0   6  -6    6.60    0.54 
   0   6   6    7.30    0.56 
   1  -6   6   19.13    1.40 
  -1  -6  -6   18.57    1.32 
   1  -6   6   20.72    1.30 
  -1  -6  -6   21.08    1.32 
  -1  -6  -6   20.11    1.33 
   1  -6   6   20.34    1.31 
  -1  -6  -6   20.50    1.44 
   1   6   6   18.01    1.14 
  -1   6  -6   14.75    1.15 
  -1   6  -6   18.61    1.21 
  -1   6  -6   18.02    1.19 
  -1   6  -6   15.82    1.30 
  -1   6  -6   16.66    1.19 
   1   6   6   18.18    1.20 
   1   6   6   15.78    1.21 
   1   6   6   17.04    1.19 
   1   6   6   18.24    1.18 
  -2  -6  -6    4.55    0.41 
   2  -6   6    5.32    0.38 
  -2  -6  -6    6.48    0.43 
  -2  -6  -6    5.50    0.40 
   2  -6   6    4.82    0.47 
  -2  -6  -6    5.16    0.40 
  -2   6  -6    4.57    0.41 
   2   6   6    4.82    0.41 
   2   6   6    5.10    0.37 
  -2   6  -6    4.41    0.38 
  -2   6  -6    4.94    0.41 
  -2   6  -6    4.19    0.49 
   2   6   6    3.56    0.38 
  -3  -6  -6    8.72    0.59 
   3  -6   6    8.84    0.57 
  -3  -6  -6    7.85    0.59 
   3  -6   6    9.24    0.58 
  -3  -6  -6    8.23    0.58 
  -3   6  -6    8.61    0.58 
  -3   6  -6    9.36    0.67 
  -3   6  -6    7.24    0.59 
  -3   6  -6    7.07    0.66 
   3   6   6    8.86    0.58 
  -4  -7   6    4.92    0.36 
  -4  -7   6    5.06    0.38 
  -4   7   6    4.34    0.31 
  -4   7   6    4.01    0.31 
  -4   7   6    3.52    0.36 
  -3  -7   6    6.85    0.46 
  -3  -7   6    5.11    0.42 
  -3  -7   6    6.09    0.44 
   3   7  -6    3.64    0.32 
  -3   7   6    3.79    0.39 
  -3   7   6    3.50    0.33 
  -3   7   6    4.65    0.43 
  -2  -7   6    1.91    0.20 
   2  -7  -6    2.34    0.38 
  -2  -7   6    1.81    0.20 
   2  -7  -6    1.91    0.17 
  -2  -7   6    1.61    0.21 
   2  -7  -6    1.92    0.19 
   2   7  -6    1.53    0.24 
   2   7  -6    1.72    0.23 
  -2   7   6    1.84    0.24 
  -2   7   6    1.89    0.28 
  -2   7   6    1.75    0.27 
   2   7  -6    1.40    0.23 
  -2   7   6    1.82    0.31 
  -1  -7   6    3.31    0.30 
  -1  -7   6    3.64    0.33 
   1  -7  -6    3.59    0.35 
   1  -7  -6    3.66    0.30 
  -1  -7   6    4.52    0.37 
  -1   7   6    2.41    0.33 
  -1   7   6    3.27    0.29 
  -1   7   6    3.00    0.33 
   1   7  -6    3.39    0.30 
   1   7  -6    2.88    0.31 
   1   7  -6    3.22    0.32 
  -1   7   6    2.55    0.30 
   0  -7  -6   24.86    1.55 
   0  -7  -6   24.08    1.53 
   0  -7   6   22.12    1.51 
   0  -7  -6   22.13    1.53 
   0   7  -6   19.07    1.16 
   0   7   6   14.92    1.19 
   0   7  -6   18.92    1.19 
   0   7   6   17.72    1.15 
   0   7   6   15.34    1.16 
   0   7   6   15.83    1.17 
  -1  -7  -6   31.17    2.00 
   1  -7   6   29.85    1.99 
  -1  -7  -6   30.94    2.01 
   1  -7   6   32.51    2.00 
  -1  -7  -6   31.48    2.02 
   1   7   6   25.19    1.71 
   1   7   6   28.55    1.68 
  -1   7  -6   20.87    1.67 
   1   7   6   24.41    1.68 
  -1   7  -6   24.98    1.78 
  -1   7  -6   28.28    1.68 
  -1   7  -6   25.32    1.69 
   2  -7   6    6.85    0.47 
  -2  -7  -6    6.82    0.47 
  -2  -7  -6    6.90    0.48 
  -2  -7  -6    6.65    0.49 
   2   7   6    3.86    0.38 
   2   7   6    4.24    0.37 
  -2   7  -6    4.45    0.49 
  -2   7  -6    3.57    0.35 
  -3  -7  -6    5.85    0.39 
  -3   7  -6    3.81    0.33 
   3   7   6    3.37    0.26 
  -3  -8   6    2.26    0.17 
  -3   8   6    1.14    0.15 
   3   8  -6    1.53    0.15 
  -3   8   6    1.35    0.15 
  -2  -8   6    0.96    0.11 
  -2  -8   6    1.02    0.11 
   2   8  -6    0.64    0.09 
   2   8  -6    0.57    0.11 
  -2   8   6    0.67    0.14 
  -2   8   6    0.73    0.14 
   2   8  -6    0.63    0.12 
   1  -8  -6    0.27    0.07 
  -1  -8   6    0.34    0.06 
  -1  -8   6    0.26    0.06 
  -1   8   6    0.27    0.12 
  -1   8   6    0.21    0.11 
  -1   8   6    0.25    0.09 
   1   8  -6    0.36    0.10 
  -1   8   6    0.16    0.11 
   1   8  -6    0.20    0.11 
   1   8  -6    0.29    0.10 
  -1   8   6    0.23    0.12 
   0  -8   6    1.77    0.16 
   0  -8  -6    1.92    0.17 
   0   8  -6    1.60    0.18 
   0   8  -6    1.88    0.19 
   0   8   6    1.13    0.18 
   0   8   6    1.34    0.20 
   0   8   6    1.54    0.18 
   0   8   6    1.85    0.19 
   0   8  -6    1.70    0.18 
  -1  -8  -6    7.83    0.56 
  -1  -8  -6    8.91    0.57 
   1   8   6    5.49    0.41 
   1   8   6    4.83    0.39 
   1   8   6    5.86    0.41 
  -1   8  -6    6.22    0.42 
  -6   0   7    0.41    0.16 
   6   0  -7    0.52    0.10 
   6   0  -7    0.59    0.09 
  -6   0   7    0.60    0.20 
  -5   0   7    6.00    0.53 
   5   0  -7    5.83    0.46 
   5   0  -7    6.23    0.61 
   5   0  -7    5.80    0.45 
   5   0  -7    6.63    0.47 
  -5   0   7    6.21    0.50 
  -4   0   7    7.60    0.67 
  -4   0   7    6.73    0.55 
   4   0  -7    7.15    0.62 
   4   0  -7    7.49    0.51 
  -4   0   7    6.31    0.57 
  -4   0   7    7.03    0.53 
   4   0  -7    6.75    0.50 
   4   0  -7    7.27    0.77 
   4   0  -7    7.07    0.56 
  -4   0   7    6.51    0.53 
   4   0  -7    6.72    0.62 
   4   0  -7    6.87    0.54 
  -4   0   7    5.93    0.53 
   4   0  -7    5.86    0.55 
  -4   0   7    6.93    0.66 
  -3   0   7   11.89    0.97 
   3   0  -7   13.30    0.91 
   3   0  -7   15.20    1.11 
   3   0  -7   13.51    0.91 
   3   0  -7   13.91    0.97 
   3   0  -7   13.88    0.93 
  -3   0   7   15.03    1.05 
  -3   0   7   13.03    1.04 
  -3   0   7   15.21    0.97 
   3   0  -7   13.81    0.96 
  -3   0   7   14.91    1.11 
   3   0  -7   12.24    1.06 
  -3   0   7   11.67    0.92 
  -3   0   7   12.44    0.98 
  -3   0   7   13.03    0.89 
   3   0  -7   14.60    1.05 
  -2   0   7   86.06    5.53 
  -2   0   7   91.87    5.59 
   2   0  -7   90.68    5.56 
   2   0  -7   86.23    5.43 
  -2   0   7   80.62    5.43 
  -2   0   7   86.51    5.56 
   2   0  -7   88.04    5.46 
   2   0  -7   89.64    5.41 
  -2   0   7   80.52    5.41 
   2   0  -7   84.98    5.40 
   2   0  -7   92.37    5.58 
   2   0  -7   83.99    5.46 
   2   0  -7   81.32    5.41 
   2   0  -7   60.34   13.42 
  -2   0   7   79.86    5.50 
  -2   0   7   80.15    7.14 
   2   0  -7   89.44    5.55 
  -1   0   7    5.47    0.41 
   1   0  -7   -2.63    6.62 
  -1   0   7    4.68    1.22 
   1   0  -7    6.30    0.54 
  -1   0   7    6.59    0.49 
   1   0  -7    5.70    0.41 
   1   0  -7    5.86    0.42 
   1   0  -7    6.12    0.53 
   1   0  -7    8.73    8.45 
  -1   0   7    5.91    0.48 
  -1   0   7    6.02    0.47 
   1   0  -7    6.51    0.47 
   1   0  -7    5.67    0.44 
   1   0  -7    6.19    0.48 
  -1   0   7    6.09    0.51 
  -1   0   7    5.48    0.41 
  -1   0   7    5.45    1.16 
  -1   0   7    6.17    0.54 
   1   0  -7    5.25    0.54 
   0   0   7   28.68    8.65 
   0   0  -7   30.93    2.22 
   0   0  -7   34.84    2.19 
   0   0   7   33.16    2.17 
   0   0   7   38.40    2.27 
   0   0  -7   29.59    2.31 
   0   0   7   34.34    2.97 
   0   0   7   36.97    2.30 
   0   0   7   36.84    2.19 
   0   0   7   30.10    2.18 
   0   0  -7   37.10    2.25 
   0   0   7   36.63    2.31 
   0   0  -7   29.52    2.81 
   0   0   7   32.27    2.22 
   0   0  -7   32.43    2.23 
   0   0   7   37.20    2.26 
   0   0  -7   34.72    2.21 
   0   0  -7   35.88    2.29 
  -1   0  -7   25.42    1.81 
  -1   0  -7   23.90    1.66 
  -1   0  -7   24.79    1.64 
   1   0   7   23.08    1.65 
   1   0   7   24.96    1.69 
  -1   0  -7   24.54    1.67 
   1   0   7   23.75    1.59 
   1   0   7   24.15    1.60 
  -1   0  -7   24.26    1.69 
   1   0   7   24.93    1.77 
   1   0   7   25.80    1.60 
  -1   0  -7   25.20    1.72 
  -1   0  -7   28.39    1.79 
   1   0   7   25.66    1.67 
   2   0   7   27.60    1.63 
  -2   0  -7   24.74    1.65 
  -2   0  -7   23.54    1.69 
   2   0   7   24.97    1.85 
   2   0   7   25.73    1.62 
  -2   0  -7   24.30    1.72 
  -2   0  -7   23.30    1.91 
   2   0   7   25.46    1.76 
  -2   0  -7   24.69    1.68 
   2   0   7   25.33    1.71 
   2   0   7   27.75    1.63 
  -2   0  -7   24.76    1.62 
  -3   0  -7  151.14    9.32 
   3   0   7  148.75    9.43 
   3   0   7  151.11    9.26 
  -3   0  -7  132.24    9.32 
  -3   0  -7  150.70    9.30 
   3   0   7  146.15    9.37 
  -3   0  -7  141.44    9.32 
   3   0   7  150.34    9.27 
   3   0   7  155.42    9.26 
  -4   0  -7    6.45    0.51 
   4   0   7    5.91    0.46 
   4   0   7    6.96    0.47 
   4   0   7    5.89    0.45 
  -4   0  -7    6.97    0.57 
  -5   0  -7    0.27    0.08 
   5   0   7    0.34    0.06 
   6  -1  -7    0.97    0.13 
  -6  -1   7    1.27    0.21 
   6  -1  -7    1.34    0.15 
  -6   1   7    1.33    0.18 
  -6   1   7    0.97    0.24 
   6   1  -7    1.10    0.14 
   5  -1  -7    5.42    0.41 
  -5  -1   7    4.94    0.48 
  -5  -1   7    5.33    0.55 
   5  -1  -7    4.94    0.40 
  -5   1   7    4.88    0.43 
   5   1  -7    4.48    0.49 
   5   1  -7    4.73    0.37 
  -5   1   7    4.52    0.41 
   5   1  -7    4.08    0.40 
  -5   1   7    4.49    0.41 
   5   1  -7    6.29    0.63 
   5   1  -7    4.71    0.35 
  -4  -1   7    5.51    0.47 
  -4  -1   7    6.01    0.44 
   4  -1  -7    6.08    0.46 
   4  -1  -7    6.68    0.51 
  -4  -1   7    6.59    0.69 
   4  -1  -7    4.98    0.59 
   4  -1  -7    6.59    0.47 
   4  -1  -7    5.89    0.50 
  -4  -1   7    6.04    0.62 
   4  -1  -7    6.59    0.71 
  -4  -1   7    5.65    0.55 
   4  -1  -7    6.19    0.47 
  -4  -1   7    6.82    0.55 
   4  -1  -7    5.61    0.55 
   4   1  -7    6.34    0.47 
  -4   1   7    5.91    0.62 
  -4   1   7    6.60    0.61 
  -4   1   7    5.77    0.52 
   4   1  -7    6.01    0.53 
  -4   1   7    5.64    0.50 
   4   1  -7    6.47    0.70 
  -4   1   7    6.55    0.52 
   4   1  -7    5.96    0.51 
   4   1  -7    5.49    0.54 
  -4   1   7    6.91    0.68 
  -4   1   7    7.35    0.65 
  -4   1   7    5.70    0.57 
  -4   1   7    6.00    0.54 
   4   1  -7    7.27    0.76 
  -3  -1   7    5.77    0.49 
   3  -1  -7    5.69    0.42 
   3  -1  -7    6.37    0.52 
  -3  -1   7    5.43    0.42 
  -3  -1   7    6.25    0.60 
   3  -1  -7    5.09    0.41 
   3  -1  -7    5.84    0.44 
   3  -1  -7    5.53    0.59 
  -3  -1   7    5.18    0.54 
  -3  -1   7    6.19    0.61 
   3  -1  -7    5.63    0.47 
  -3  -1   7    4.75    0.48 
   3  -1  -7    5.18    0.42 
   3  -1  -7    5.92    0.55 
   3   1  -7    5.59    0.49 
  -3   1   7    5.17    0.43 
  -3   1   7    5.53    0.57 
  -3   1   7    5.78    0.56 
  -3   1   7    4.89    0.52 
   3   1  -7    4.88    0.39 
  -3   1   7    5.65    0.42 
   3   1  -7    5.42    0.40 
  -3   1   7    6.18    0.49 
  -3   1   7    5.96    0.54 
   3   1  -7    4.84    0.46 
  -3   1   7    4.19    0.60 
  -3   1   7    4.79    0.46 
   3   1  -7    5.82    0.53 
  -3   1   7    4.75    0.42 
   3   1  -7    5.49    0.58 
   3   1  -7    5.81    0.46 
   3   1  -7    5.00    0.39 
  -2  -1   7   11.15    2.11 
  -2  -1   7   15.88    1.11 
   2  -1  -7   15.49    1.05 
   2  -1  -7   18.10    1.38 
  -2  -1   7   14.81    1.02 
   2  -1  -7   13.98    1.02 
   2  -1  -7   16.84    1.19 
   2  -1  -7   16.25    1.04 
   2  -1  -7   14.64    1.03 
  -2  -1   7   17.08    1.20 
  -2  -1   7   17.63    2.42 
  -2  -1   7   16.24    1.21 
   2  -1  -7   15.69    1.08 
  -2  -1   7   15.76    1.13 
  -2  -1   7   14.82    1.03 
  -2  -1   7   15.92    1.12 
  -2  -1   7   15.23    1.14 
   2  -1  -7   15.33    1.09 
   2  -1  -7   15.45    1.20 
  -2   1   7   16.53    1.09 
  -2   1   7   15.41    1.03 
  -2   1   7   13.05    1.08 
   2   1  -7   14.48    0.99 
   2   1  -7   15.03    1.01 
   2   1  -7   13.96    0.98 
   2   1  -7   14.64    1.05 
   2   1  -7   14.05    1.08 
   2   1  -7   15.81    1.05 
  -2   1   7   15.16    1.10 
   2   1  -7   11.37   11.59 
   2   1  -7   15.80    1.16 
   2   1  -7   14.95    1.12 
  -2   1   7   16.45    1.15 
  -1  -1   7   31.13    2.05 
   1  -1  -7   31.84    2.05 
   1  -1  -7   32.28    2.06 
   1  -1  -7   31.11    2.07 
  -1  -1   7   34.38    2.13 
   1  -1  -7   30.28    2.17 
  -1  -1   7   31.98    2.80 
   1  -1  -7   32.86    2.11 
   1  -1  -7   31.35    2.11 
  -1  -1   7   31.13    2.06 
  -1  -1   7   32.98    2.06 
   1  -1  -7   32.58   11.56 
   1  -1  -7   20.09    8.74 
   1  -1  -7   32.44    2.22 
  -1  -1   7   33.03    2.20 
  -1  -1   7   32.68    2.10 
  -1  -1   7   36.07    2.20 
  -1  -1   7   29.78    2.13 
  -1  -1   7   32.81    2.15 
  -1  -1   7   30.39    2.98 
   1   1  -7   30.42    2.01 
  -1   1   7   28.84    2.70 
  -1   1   7   31.11    2.00 
  -1   1   7   31.26    2.01 
  -1   1   7   28.92    2.64 
   1   1  -7   31.64    2.04 
  -1   1   7   30.97    1.98 
   1   1  -7   28.64    1.97 
  -1   1   7   26.15    1.97 
   1   1  -7   27.60    8.66 
   1   1  -7   28.00    8.12 
   1   1  -7   34.44    1.97 
   1   1  -7   26.75    1.99 
  -1   1   7   32.71    2.06 
   1   1  -7   28.27    1.92 
  -1   1   7   28.95    1.96 
   0  -1  -7    0.33    1.56 
   0  -1   7   -0.33    1.16 
   0  -1  -7   -8.21   10.14 
   0   1   7    1.98    1.25 
   0   1  -7   -1.98    7.58 
   0   1  -7   -5.90    8.51 
   0   1   7   -0.15    7.07 
  -1  -1  -7   11.21    1.01 
  -1  -1  -7   11.42    0.88 
  -1  -1  -7   12.64    0.85 
   1  -1   7   13.42    0.89 
  -1  -1  -7   10.68    0.84 
  -1  -1  -7   13.06    0.84 
   1  -1   7   11.99    0.97 
  -1  -1  -7   11.60    0.80 
  -1  -1  -7   10.43    0.84 
   1  -1   7   11.68    0.78 
   1  -1   7   13.41    0.97 
   1  -1   7   12.28    0.88 
   1  -1   7   12.39    0.79 
   1  -1   7   11.43    0.79 
  -1  -1  -7   12.22    0.85 
  -1  -1  -7   11.68    0.79 
  -1   1  -7   11.82    0.78 
   1   1   7   11.70    0.81 
   1   1   7   17.17   18.69 
   1   1   7   11.33    0.90 
  -1   1  -7   10.55    0.79 
   1   1   7   10.28    0.78 
  -1   1  -7    9.21    0.81 
   1   1   7   10.32    0.72 
   1   1   7   11.37    0.76 
   1   1   7   11.32    0.84 
   1   1   7   11.91    0.73 
  -1   1  -7   11.82    0.80 
   1   1   7   12.78    0.92 
   1   1   7   10.77    0.73 
   1   1   7   10.85    0.80 
  -1   1  -7   11.12    0.88 
  -1   1  -7   11.86    0.83 
  -1   1  -7   10.85    0.95 
  -1   1  -7   10.25    0.77 
  -1   1  -7    9.39    0.76 
  -2  -1  -7   20.95    1.80 
  -2  -1  -7   23.19    1.61 
  -2  -1  -7   22.39    1.55 
   2  -1   7   23.70    1.49 
  -2  -1  -7   24.01    1.49 
   2  -1   7   24.30    1.49 
   2  -1   7   22.87    1.48 
   2  -1   7   22.59    1.72 
   2  -1   7   22.30    1.61 
   2  -1   7   23.76    1.58 
  -2  -1  -7   22.33    1.52 
   2   1   7   20.48    1.47 
   2   1   7   22.57    1.45 
   2   1   7   20.38    1.37 
  -2   1  -7   18.87    1.52 
  -2   1  -7   21.97    1.41 
  -2   1  -7   20.80    1.42 
  -2   1  -7   20.54    1.51 
   2   1   7   22.25    1.40 
   2   1   7   22.52    1.51 
   2   1   7   22.43    1.62 
   2   1   7   19.71    1.43 
   2   1   7   21.81    1.37 
   3  -1   7   27.75    1.67 
  -3  -1  -7   22.70    1.76 
   3  -1   7   26.60    1.84 
   3  -1   7   27.56    1.78 
  -3  -1  -7   25.65    1.65 
   3  -1   7   26.52    1.66 
   3  -1   7   24.08    1.66 
  -3  -1  -7   25.09    1.70 
  -3  -1  -7   25.82    1.72 
   3   1   7   23.24    1.62 
  -3   1  -7   25.97    1.68 
   3   1   7   26.45    1.63 
   3   1   7   23.84    1.62 
   3   1   7   27.53    1.72 
  -3   1  -7   25.02    1.70 
   3   1   7   22.71    1.69 
   3   1   7   24.60    1.78 
  -3   1  -7   27.35    1.68 
  -4  -1  -7    4.48    0.37 
   4  -1   7    4.34    0.33 
  -4  -1  -7    4.75    0.40 
   4  -1   7    3.88    0.33 
  -4   1  -7    4.47    0.37 
   4   1   7    4.53    0.33 
  -4   1  -7    4.15    0.39 
  -5  -1  -7   10.89    0.73 
   5  -1   7   10.52    0.70 
  -5   1  -7    8.34    0.65 
  -5   1  -7   10.30    0.62 
   5   1   7    9.02    0.60 
   6  -2  -7    1.00    0.12 
  -6  -2   7    1.24    0.19 
   6  -2  -7    1.24    0.13 
  -6   2   7    1.00    0.15 
  -6   2   7    0.92    0.23 
   5  -2  -7    0.63    0.13 
   5  -2  -7    0.65    0.13 
  -5  -2   7    0.63    0.18 
   5  -2  -7    0.56    0.12 
  -5   2   7    0.84    0.20 
  -5   2   7    0.86    0.26 
  -5   2   7    0.89    0.19 
   5   2  -7    0.55    0.11 
  -5   2   7    0.76    0.20 
   5   2  -7    0.39    0.15 
  -5   2   7    0.55    0.13 
  -4  -2   7    9.76    0.86 
   4  -2  -7    9.93    0.67 
  -4  -2   7    8.76    0.76 
  -4  -2   7    9.84    0.67 
   4  -2  -7    8.61    0.74 
   4  -2  -7    9.33    0.67 
   4  -2  -7    8.61    0.76 
   4  -2  -7    9.25    0.71 
   4  -2  -7   10.23    0.70 
   4  -2  -7   10.01    0.68 
  -4  -2   7    9.17    0.81 
  -4  -2   7   10.01    0.75 
  -4   2   7   10.70    0.88 
   4   2  -7    9.99    0.72 
   4   2  -7    9.05    0.73 
  -4   2   7    8.63    0.70 
  -4   2   7    9.38    0.79 
  -4   2   7    9.46    0.83 
  -4   2   7    8.88    0.71 
   4   2  -7    9.24    0.65 
  -4   2   7    8.78    0.75 
  -4   2   7   10.25    0.83 
   4   2  -7    8.33    0.73 
  -4   2   7    9.71    0.72 
  -4   2   7   10.06    0.83 
   4   2  -7    9.40    0.80 
  -3  -2   7   28.13    1.88 
   3  -2  -7   25.30    1.87 
   3  -2  -7   28.84    1.83 
  -3  -2   7   29.43    2.02 
   3  -2  -7   28.69    1.95 
  -3  -2   7   27.89    1.83 
  -3  -2   7   29.26    1.91 
   3  -2  -7   29.49    2.08 
   3  -2  -7   29.57    1.84 
  -3  -2   7   25.87    1.94 
  -3  -2   7   27.04    1.82 
   3  -2  -7   28.13    2.01 
   3  -2  -7   27.08    1.88 
   3  -2  -7   26.83    1.82 
   3  -2  -7   27.98    1.81 
  -3  -2   7   30.48    2.03 
  -3   2   7   28.30    1.86 
  -3   2   7   25.47    1.86 
  -3   2   7   23.93    1.76 
  -3   2   7   27.71    1.76 
   3   2  -7   27.49    1.92 
   3   2  -7   27.55    1.87 
  -3   2   7   26.77    1.79 
   3   2  -7   24.00    1.79 
   3   2  -7   26.51    1.79 
  -3   2   7   24.09    1.75 
  -3   2   7   26.11    1.89 
  -3   2   7   26.91    1.88 
  -3   2   7   30.20    1.88 
   3   2  -7   25.45    1.71 
   3   2  -7   27.81    1.77 
  -2  -2   7   24.71    1.54 
  -2  -2   7   22.42    1.64 
   2  -2  -7   24.09    1.55 
  -2  -2   7   23.44    1.69 
   2  -2  -7   22.44    1.73 
  -2  -2   7   23.06    1.54 
  -2  -2   7   23.56    1.58 
   2  -2  -7   24.03    1.67 
   2  -2  -7   23.50    1.53 
   2  -2  -7   24.73    1.67 
   2  -2  -7   23.90    1.54 
   2  -2  -7   23.98    1.60 
   2  -2  -7   22.32    1.58 
  -2  -2   7   25.65    1.77 
  -2  -2   7   23.89    1.61 
  -2  -2   7   22.44    1.53 
  -2   2   7   22.08    1.49 
  -2   2   7   19.65    1.36 
   2   2  -7   22.71    1.42 
  -2   2   7   24.87    1.81 
   2   2  -7   20.75    1.37 
  -2   2   7   22.48    1.42 
  -2   2   7   20.65    1.72 
  -2   2   7   21.40    1.48 
   2   2  -7   21.42    1.44 
  -2   2   7   23.31    1.46 
   2   2  -7   20.44    1.54 
  -2   2   7   18.59    1.41 
   2   2  -7   18.99    1.43 
   2   2  -7   22.24    1.51 
  -2   2   7   18.29    1.40 
   1  -2  -7    5.32    0.45 
   1  -2  -7    4.53    0.49 
   1  -2  -7    5.50    0.58 
  -1  -2   7    5.05    0.43 
   1  -2  -7    5.67    0.46 
  -1  -2   7    5.21    0.44 
   1  -2  -7    5.77    0.43 
  -1  -2   7    6.53    0.58 
  -1  -2   7    5.38    0.49 
  -1  -2   7    5.46    0.54 
  -1  -2   7    5.59    0.48 
  -1  -2   7    5.64    0.52 
   1  -2  -7    5.18    0.39 
   1  -2  -7    5.21    0.40 
  -1  -2   7    5.38    0.39 
  -1  -2   7    5.49    0.40 
   1   2  -7    5.54    0.59 
   1   2  -7    4.44    0.47 
  -1   2   7    5.72    0.50 
  -1   2   7    5.18    0.46 
   1   2  -7    5.49    0.45 
  -1   2   7    5.27    0.42 
  -1   2   7    5.14    0.41 
   0  -2   7   16.70    1.09 
   0  -2  -7   16.57    1.11 
   0  -2   7   17.20    1.10 
   0  -2  -7   17.76    1.19 
   0  -2   7   16.79    1.12 
   0  -2   7   16.90    1.26 
   0  -2  -7   16.44    1.10 
   0  -2   7   16.84    1.19 
   0  -2  -7   16.56    1.13 
   0  -2  -7   16.04    1.31 
   0  -2   7   16.95    1.23 
   0  -2   7   17.02    1.18 
   0   2   7   15.14    1.14 
   0   2  -7   17.30    1.09 
   0   2   7   17.02    1.18 
   0   2  -7   15.25    1.15 
   0   2  -7   16.52    1.10 
   0   2   7   13.39    1.17 
   0   2   7   17.24    1.10 
   0   2   7   16.42    1.11 
   1  -2   7    7.50    0.61 
   1  -2   7    7.72    0.49 
  -1  -2  -7    6.92    0.50 
   1  -2   7    7.01    0.55 
   1  -2   7    6.69    0.48 
  -1  -2  -7    6.80    0.50 
   1  -2   7    6.74    0.68 
  -1  -2  -7    6.43    0.59 
   1  -2   7    7.85    0.60 
   1  -2   7    6.85    0.48 
  -1  -2  -7    6.63    0.74 
  -1  -2  -7    6.64    0.54 
  -1  -2  -7    6.95    0.49 
  -1  -2  -7    5.95    0.49 
  -1   2  -7    6.22    0.60 
   1   2   7    6.38    0.53 
   1   2   7    5.66    0.49 
   1   2   7    6.23    0.47 
   1   2   7    6.01    0.49 
   1   2   7    6.87    0.43 
  -1   2  -7    5.98    0.51 
  -1   2  -7    6.00    0.47 
  -1   2  -7    5.97    0.52 
  -1   2  -7    5.92    0.48 
   1   2   7    6.27    0.53 
   1   2   7    6.11    0.51 
   1   2   7    6.62    0.61 
  -2  -2  -7   47.50    3.11 
   2  -2   7   46.40    3.27 
   2  -2   7   50.17    3.11 
   2  -2   7   47.19    3.01 
  -2  -2  -7   47.07    3.03 
  -2  -2  -7   41.46    3.09 
  -2  -2  -7   48.51    3.08 
   2  -2   7   50.12    3.03 
   2  -2   7   51.37    3.02 
  -2  -2  -7   46.61    3.16 
  -2  -2  -7   42.33    3.36 
  -2  -2  -7   46.33    3.05 
  -2  -2  -7   50.42    3.03 
   2  -2   7   49.30    3.16 
  -2  -2  -7   47.23    3.02 
   2   2   7   44.30    2.98 
  -2   2  -7   46.45    2.93 
  -2   2  -7   42.20    2.89 
   2   2   7   42.48    3.08 
   2   2   7   48.71    2.85 
   3  -2   7    4.50    0.33 
  -3  -2  -7    3.97    0.40 
  -3  -2  -7    4.56    0.38 
  -3  -2  -7    4.10    0.33 
   3  -2   7    4.49    0.34 
   3  -2   7    4.68    0.44 
   3  -2   7    4.46    0.33 
  -3  -2  -7    3.40    0.45 
  -3   2  -7    3.65    0.43 
  -3   2  -7    4.12    0.36 
   3   2   7    3.53    0.43 
   3   2   7    4.19    0.30 
   3   2   7    3.88    0.39 
  -3   2  -7    4.08    0.41 
   4  -2   7   33.68    2.22 
   4  -2   7   35.20    2.22 
  -4  -2  -7   39.29    2.30 
  -4  -2  -7   34.21    2.27 
   4  -2   7   31.85    2.25 
   4   2   7   29.87    1.99 
  -4   2  -7   31.89    2.06 
  -4   2  -7   32.38    2.02 
   5  -2   7    8.66    0.65 
  -5  -2  -7   11.16    0.68 
  -5   2  -7    8.80    0.61 
   6  -3  -7    4.16    0.31 
  -6   3   7    4.36    0.32 
  -6   3   7    4.06    0.32 
   6   3  -7    4.00    0.34 
  -5  -3   7    1.07    0.22 
   5  -3  -7    0.97    0.15 
   5  -3  -7    0.99    0.15 
  -5  -3   7    0.98    0.13 
   5  -3  -7    0.99    0.15 
  -5   3   7    0.95    0.22 
   5   3  -7    0.83    0.20 
  -5   3   7    1.04    0.21 
  -5   3   7    0.94    0.22 
   4  -3  -7    9.16    0.65 
  -4  -3   7    9.36    0.73 
   4  -3  -7    8.96    0.64 
  -4  -3   7    9.36    0.65 
  -4  -3   7    8.19    0.72 
  -4  -3   7    9.00    0.80 
   4  -3  -7    8.89    0.65 
  -4  -3   7    8.13    0.76 
   4  -3  -7    9.32    0.64 
  -4   3   7    8.07    0.79 
   4   3  -7    9.81    0.72 
  -4   3   7    8.61    0.76 
   4   3  -7    8.29    0.74 
   4   3  -7    8.33    0.58 
  -4   3   7    8.06    0.61 
  -4   3   7    8.49    0.66 
   4   3  -7    7.83    0.68 
   4   3  -7    8.16    0.64 
  -4   3   7    8.45    0.70 
  -4   3   7    9.39    0.78 
  -3  -3   7    0.64    0.12 
   3  -3  -7    1.10    0.15 
   3  -3  -7    0.55    0.18 
  -3  -3   7    1.06    0.25 
   3  -3  -7    1.03    0.16 
  -3  -3   7    1.26    0.28 
  -3  -3   7    1.01    0.17 
   3  -3  -7    0.99    0.16 
  -3  -3   7    0.73    0.29 
   3  -3  -7    1.02    0.34 
   3  -3  -7    0.91    0.21 
   3  -3  -7    1.04    0.30 
  -3  -3   7    1.14    0.30 
   3  -3  -7    1.20    0.28 
  -3  -3   7    0.76    0.18 
  -3  -3   7    0.78    0.20 
   3   3  -7    0.96    0.22 
  -3   3   7    1.11    0.21 
   3   3  -7    0.90    0.21 
   3   3  -7    1.02    0.26 
  -3   3   7    1.11    0.25 
  -3   3   7    1.22    0.33 
  -3   3   7    0.91    0.16 
   3   3  -7    0.86    0.13 
   3   3  -7    1.17    0.19 
  -3   3   7    1.18    0.31 
  -3   3   7    1.15    0.30 
  -3   3   7    1.08    0.25 
  -3   3   7    1.11    0.30 
  -3   3   7    0.86    0.19 
   2  -3  -7    5.70    0.44 
  -2  -3   7    5.61    0.56 
   2  -3  -7    6.38    0.53 
  -2  -3   7    5.84    0.62 
  -2  -3   7    5.86    0.45 
   2  -3  -7    6.11    0.43 
  -2  -3   7    5.72    0.46 
   2  -3  -7    6.41    0.45 
   2  -3  -7    5.73    0.58 
  -2  -3   7    5.57    0.44 
   2  -3  -7    6.20    0.67 
  -2  -3   7    6.29    0.60 
   2  -3  -7    5.87    0.45 
  -2  -3   7    6.54    0.50 
  -2  -3   7    6.05    0.53 
   2   3  -7    5.74    0.43 
  -2   3   7    6.15    0.59 
   2   3  -7    5.01    0.48 
   2   3  -7    5.08    0.40 
  -2   3   7    5.48    0.51 
  -2   3   7    5.00    0.44 
   2   3  -7    5.09    0.47 
  -2   3   7    5.38    0.45 
   2   3  -7    4.94    0.46 
  -2   3   7    4.81    0.48 
  -2   3   7    6.06    0.49 
  -2   3   7    5.53    0.52 
   2   3  -7    5.18    0.60 
  -2   3   7    5.24    0.44 
   2   3  -7    5.63    0.53 
   1  -3  -7   31.64    2.00 
  -1  -3   7   32.46    2.00 
   1  -3  -7   29.32    2.05 
  -1  -3   7   33.26    2.15 
  -1  -3   7   31.16    1.99 
   1  -3  -7   29.34    1.98 
  -1  -3   7   29.64    2.08 
   1  -3  -7   29.81    2.00 
  -1  -3   7   29.97    2.00 
  -1  -3   7   31.61    2.04 
   1  -3  -7   33.24    2.26 
   1  -3  -7   30.88    2.01 
  -1   3   7   27.82    1.83 
  -1   3   7   29.09    1.81 
  -1   3   7   25.84    1.76 
  -1   3   7   22.17    1.74 
  -1   3   7   28.26    1.78 
  -1   3   7   26.89    1.76 
   1   3  -7   24.92    1.78 
   1   3  -7   29.13    1.87 
   1   3  -7   25.41    1.91 
   1   3  -7   28.52    1.74 
   0  -3  -7    8.60    0.60 
   0  -3  -7    8.60    0.62 
   0  -3   7    9.04    0.80 
   0  -3  -7    8.70    0.64 
   0  -3   7    8.61    0.61 
   0  -3   7    8.73    0.60 
   0  -3   7    8.68    0.71 
   0  -3  -7    8.23    0.69 
   0  -3  -7    8.93    0.62 
   0  -3  -7    9.71    0.88 
   0  -3   7    8.94    0.66 
   0  -3   7    8.38    0.74 
   0  -3   7    9.27    0.61 
   0   3  -7    8.14    0.60 
   0   3  -7    7.84    0.60 
   0   3   7    8.14    0.58 
   0   3   7    7.44    0.57 
   0   3  -7    8.03    0.65 
   0   3  -7    7.64    0.60 
   0   3   7    8.08    0.63 
   0   3  -7    8.04    0.60 
   0   3   7    8.10    0.59 
   0   3   7    7.32    0.58 
   0   3  -7    8.25    0.74 
   0   3   7    7.36    0.58 
   1  -3   7   14.35    0.97 
   1  -3   7   14.85    1.04 
  -1  -3  -7   14.40    1.11 
   1  -3   7   15.09    1.10 
   1  -3   7   14.74    0.98 
   1  -3   7   16.36    0.99 
  -1  -3  -7   14.54    0.98 
  -1  -3  -7   15.58    1.00 
   1  -3   7   15.27    1.09 
  -1  -3  -7   13.21    0.99 
   1  -3   7   14.63    1.20 
  -1  -3  -7   15.09    1.05 
  -1  -3  -7   13.46    1.27 
  -1  -3  -7   15.70    1.00 
   1   3   7   14.13    0.99 
  -1   3  -7   14.44    0.99 
   1   3   7   13.67    0.98 
   1   3   7   14.83    1.00 
   1   3   7   13.25    0.95 
   1   3   7   13.59    0.97 
  -1   3  -7   13.35    1.09 
  -1   3  -7   13.25    0.98 
   1   3   7   12.81    1.08 
   2  -3   7    4.69    0.36 
   2  -3   7    4.51    0.43 
   2  -3   7    4.57    0.69 
  -2  -3  -7    4.51    0.36 
  -2  -3  -7    5.03    0.38 
  -2  -3  -7    4.29    0.50 
  -2  -3  -7    3.33    0.70 
  -2  -3  -7    4.86    0.37 
   2  -3   7    4.56    0.35 
   2  -3   7    4.64    0.35 
  -2  -3  -7    6.01    0.63 
  -2  -3  -7    4.50    0.39 
  -2   3  -7    4.22    0.50 
   2   3   7    4.15    0.42 
  -2   3  -7    4.63    0.43 
   2   3   7    4.32    0.42 
   2   3   7    4.72    0.63 
  -2   3  -7    4.38    0.43 
   2   3   7    4.01    0.30 
   3  -3   7    5.18    0.48 
   3  -3   7    5.22    0.37 
  -3  -3  -7    4.56    0.43 
   3  -3   7    5.34    0.36 
  -3  -3  -7    5.05    0.41 
  -3  -3  -7    4.72    0.38 
   3  -3   7    4.45    0.36 
  -3  -3  -7    4.47    0.54 
  -3   3  -7    4.57    0.49 
   3   3   7    4.12    0.31 
  -3   3  -7    4.83    0.44 
  -3   3  -7    4.62    0.44 
   3   3   7    4.81    0.43 
   4  -3   7   24.61    1.67 
   4  -3   7   27.22    1.67 
  -4  -3  -7   26.20    1.70 
   4  -3   7   26.25    1.76 
  -4  -3  -7   26.87    1.74 
   4  -3   7   25.32    1.67 
   4   3   7   27.45    1.59 
  -4   3  -7   22.95    1.51 
  -4   3  -7   20.54    1.57 
  -4   3  -7   22.37    1.56 
  -6   4   7    4.21    0.35 
   6   4  -7    5.30    0.40 
  -6   4   7    5.61    0.41 
  -5  -4   7    8.66    0.70 
   5  -4  -7    9.57    0.65 
  -5  -4   7   10.05    0.64 
   5  -4  -7    9.33    0.64 
   5  -4  -7    9.53    0.65 
  -5   4   7    7.21    0.71 
  -5   4   7    8.44    0.65 
   5   4  -7    9.15    0.68 
  -5   4   7    8.55    0.63 
  -4  -4   7    5.33    0.41 
  -4  -4   7    5.23    0.40 
  -4  -4   7    4.78    0.50 
   4  -4  -7    4.76    0.39 
   4  -4  -7    5.26    0.40 
   4  -4  -7    5.36    0.39 
  -4  -4   7    4.90    0.41 
  -4   4   7    4.83    0.52 
  -4   4   7    4.74    0.46 
  -4   4   7    4.84    0.42 
   4   4  -7    4.48    0.43 
   4   4  -7    4.46    0.43 
  -4   4   7    3.84    0.47 
  -4   4   7    4.24    0.48 
  -4   4   7    4.20    0.39 
  -3  -4   7   13.00    1.02 
   3  -4  -7   13.40    0.97 
   3  -4  -7   14.32    0.91 
   3  -4  -7   14.13    0.93 
  -3  -4   7   13.92    0.94 
   3  -4  -7   12.24    1.03 
  -3  -4   7   13.18    0.92 
   3  -4  -7   12.44    0.91 
  -3  -4   7   14.22    0.93 
   3  -4  -7   14.71    0.93 
  -3  -4   7   13.00    1.02 
  -3  -4   7   12.86    1.06 
  -3  -4   7   13.78    0.99 
  -3   4   7   13.82    1.01 
  -3   4   7   12.02    1.06 
   3   4  -7   12.99    1.02 
  -3   4   7   12.40    0.93 
  -3   4   7   11.68    0.84 
   3   4  -7   12.08    0.86 
   3   4  -7   13.33    0.95 
  -3   4   7   13.31    0.92 
  -3   4   7   11.51    0.97 
   3   4  -7   12.03    0.93 
  -3   4   7   12.22    0.96 
  -3   4   7   13.46    0.92 
  -3   4   7   13.67    1.07 
   2  -4  -7    9.10    0.63 
   2  -4  -7    7.71    0.55 
  -2  -4   7    7.03    0.64 
  -2  -4   7    7.60    0.55 
  -2  -4   7    6.77    0.65 
  -2  -4   7    7.08    0.59 
   2  -4  -7    7.68    0.63 
   2  -4  -7    7.54    0.56 
  -2  -4   7    7.42    0.56 
  -2  -4   7    8.66    0.84 
  -2  -4   7    7.19    0.56 
  -2  -4   7    7.38    0.70 
   2  -4  -7    7.60    0.53 
   2   4  -7    6.36    0.55 
  -2   4   7    6.01    0.49 
  -2   4   7    6.21    0.53 
  -2   4   7    7.24    0.58 
   2   4  -7    7.28    0.64 
  -2   4   7    7.19    0.70 
  -2   4   7    7.11    0.62 
   2   4  -7    6.99    0.58 
   2   4  -7    6.23    0.58 
  -2   4   7    5.71    0.53 
   2   4  -7    6.07    0.69 
   1  -4  -7   14.09    0.91 
  -1  -4   7   13.38    1.08 
  -1  -4   7   12.52    0.90 
   1  -4  -7   12.14    0.97 
  -1  -4   7   14.52    0.91 
   1  -4  -7   13.15    0.92 
   1  -4  -7   12.84    0.88 
   1  -4  -7   12.65    0.89 
   1  -4  -7   13.06    1.17 
  -1  -4   7   12.52    0.98 
  -1  -4   7   13.20    1.10 
  -1  -4   7   13.49    1.01 
  -1  -4   7   13.24    0.95 
  -1  -4   7   13.88    1.06 
  -1  -4   7   13.66    0.89 
  -1   4   7   12.17    0.93 
   1   4  -7   10.41    0.82 
   1   4  -7   11.01    0.85 
   1   4  -7   13.48    0.89 
  -1   4   7   12.71    0.88 
   1   4  -7   12.27    0.93 
   1   4  -7   10.93    0.86 
  -1   4   7    9.81    0.82 
  -1   4   7   11.50    0.84 
  -1   4   7   12.16    0.92 
  -1   4   7   12.76    0.89 
   1   4  -7   10.72    1.00 
   0  -4   7    5.55    0.54 
   0  -4   7    5.37    0.39 
   0  -4   7    5.24    0.38 
   0  -4  -7    4.81    0.51 
   0  -4   7    5.07    0.50 
   0  -4   7    5.11    0.39 
   0  -4  -7    5.08    0.43 
   0  -4  -7    5.67    0.50 
   0  -4   7    4.31    0.55 
   0  -4  -7    4.61    0.63 
   0  -4  -7    5.45    0.41 
   0  -4  -7    5.54    0.39 
   0  -4   7    4.03    0.48 
   0  -4   7    4.61    0.58 
   0   4  -7    3.81    0.43 
   0   4  -7    4.47    0.40 
   0   4  -7    4.35    0.44 
   0   4   7    4.58    0.39 
   0   4  -7    4.69    0.43 
   0   4  -7    3.90    0.39 
   0   4   7    4.76    0.43 
   0   4   7    4.14    0.39 
   0   4   7    4.49    0.40 
   0   4  -7    5.17    0.57 
   0   4   7    5.08    0.44 
   0   4   7    3.80    0.48 
   1  -4   7    9.37    0.94 
  -1  -4  -7   10.56    0.70 
   1  -4   7    9.33    0.68 
  -1  -4  -7   10.27    0.69 
  -1  -4  -7    8.51    0.68 
   1  -4   7   10.63    0.71 
   1  -4   7    9.96    0.67 
   1  -4   7   10.48    0.80 
   1  -4   7    9.70    0.74 
  -1  -4  -7   10.51    0.77 
  -1  -4  -7    9.43    1.03 
  -1  -4  -7   10.28    0.70 
   1   4   7    9.14    0.69 
  -1   4  -7    9.47    0.84 
   1   4   7    9.44    0.71 
   1   4   7    9.12    0.69 
  -1   4  -7    9.70    0.72 
   1   4   7    9.97    0.73 
  -1   4  -7    8.94    0.71 
  -1   4  -7    8.99    0.67 
   1   4   7    9.00    0.81 
   2  -4   7   54.40    3.20 
  -2  -4  -7   47.33    3.17 
  -2  -4  -7   46.60    3.08 
   2  -4   7   45.84    3.13 
  -2  -4  -7   51.42    3.08 
   2  -4   7   49.14    3.07 
   2  -4   7   47.04    3.06 
  -2  -4  -7   43.17    3.08 
   2  -4   7   49.49    3.06 
  -2  -4  -7   45.82    3.24 
  -2  -4  -7   49.73    3.07 
  -2   4  -7   43.05    2.83 
  -2   4  -7   42.26    2.88 
   2   4   7   45.77    2.87 
  -2   4  -7   42.42    3.00 
  -2   4  -7   48.24    2.91 
   2   4   7   43.70    2.87 
  -3  -4  -7    3.02    0.27 
  -3  -4  -7    3.79    0.34 
   3  -4   7    3.01    0.27 
  -3  -4  -7    3.35    0.29 
   3  -4   7    3.58    0.28 
   3  -4   7    3.69    0.39 
   3  -4   7    3.94    0.27 
  -3   4  -7    2.66    0.38 
  -3   4  -7    2.97    0.33 
   3   4   7    3.60    0.34 
  -3   4  -7    3.31    0.33 
  -3   4  -7    3.33    0.34 
  -4  -4  -7    5.58    0.40 
   4  -4   7    5.88    0.38 
   4  -4   7    5.32    0.38 
   4  -4   7    6.51    0.49 
  -4  -4  -7    4.92    0.37 
  -4  -4  -7    5.63    0.42 
   4  -4   7    5.45    0.39 
   4   4   7    4.32    0.34 
   4   4   7    5.89    0.40 
  -4   4  -7    5.15    0.40 
  -4   4  -7    4.46    0.45 
   5  -5  -7    4.64    0.32 
  -5  -5   7    4.21    0.31 
  -5   5   7    4.50    0.33 
  -5   5   7    3.22    0.34 
   5   5  -7    4.11    0.33 
  -5   5   7    3.58    0.36 
  -5   5   7    4.24    0.34 
   4  -5  -7   11.50    0.74 
   4  -5  -7   10.29    0.74 
  -4  -5   7   10.71    0.74 
  -4  -5   7    9.92    0.74 
  -4  -5   7   11.55    0.76 
  -4  -5   7   11.06    0.78 
  -4   5   7   10.98    0.83 
   4   5  -7   10.20    0.73 
  -4   5   7    8.05    0.71 
   4   5  -7    9.17    0.70 
  -4   5   7   10.60    0.72 
  -4   5   7   10.09    0.76 
  -4   5   7    8.96    0.75 
   3  -5  -7    2.40    0.21 
   3  -5  -7    1.76    0.28 
  -3  -5   7    2.03    0.21 
  -3  -5   7    2.09    0.22 
   3  -5  -7    1.90    0.30 
   3  -5  -7    1.58    0.22 
   3  -5  -7    2.09    0.20 
  -3   5   7    1.96    0.34 
  -3   5   7    1.58    0.33 
  -3   5   7    1.91    0.28 
  -3   5   7    1.71    0.30 
  -3   5   7    1.55    0.25 
  -3   5   7    2.04    0.27 
   3   5  -7    1.88    0.27 
  -2  -5   7   -0.19    0.16 
  -2  -5   7    0.06    0.11 
  -2  -5   7    0.05    0.10 
  -2  -5   7    0.06    0.09 
  -2  -5   7    0.07    0.08 
   2  -5  -7    0.10    0.08 
   2  -5  -7    0.11    0.10 
  -2  -5   7    0.30    0.19 
   2  -5  -7    0.03    0.21 
   2  -5  -7    0.11    0.08 
  -2   5   7    0.10    0.22 
   2   5  -7    0.10    0.10 
   2   5  -7    0.19    0.10 
  -2   5   7   -0.03    0.09 
   2   5  -7    0.15    0.16 
   2   5  -7    0.04    0.11 
  -2   5   7    0.08    0.15 
  -2   5   7    0.05    0.17 
  -2   5   7   -0.06    0.14 
  -2   5   7    0.04    0.10 
  -2   5   7    0.18    0.15 
  -1  -5   7    6.09    0.44 
  -1  -5   7    5.46    0.53 
   1  -5  -7    5.27    0.45 
   1  -5  -7    6.25    0.45 
  -1  -5   7    6.10    0.45 
  -1  -5   7    5.93    0.49 
   1  -5  -7    5.71    0.44 
  -1  -5   7    5.35    0.56 
   1  -5  -7    5.79    0.43 
  -1  -5   7    5.87    0.45 
   1   5  -7    4.70    0.43 
  -1   5   7    4.28    0.43 
  -1   5   7    5.77    0.48 
   1   5  -7    4.69    0.58 
  -1   5   7    4.90    0.42 
   1   5  -7    4.60    0.43 
   1   5  -7    4.81    0.42 
  -1   5   7    5.40    0.51 
  -1   5   7    5.45    0.60 
   1   5  -7    4.51    0.45 
  -1   5   7    4.80    0.39 
  -1   5   7    5.35    0.45 
   1   5  -7    4.97    0.51 
   0  -5  -7    7.16    0.62 
   0  -5   7    8.15    0.68 
   0  -5   7    7.48    0.58 
   0  -5   7    8.53    0.57 
   0  -5  -7    8.39    0.57 
   0  -5  -7    8.53    0.59 
   0  -5   7    7.91    0.71 
   0  -5   7    8.54    0.58 
   0  -5  -7    8.00    0.58 
   0   5  -7    6.93    0.52 
   0   5   7    7.37    0.53 
   0   5   7    6.83    0.56 
   0   5  -7    6.85    0.56 
   0   5   7    7.21    0.57 
   0   5   7    7.65    0.60 
   0   5  -7    6.55    0.56 
   0   5  -7    7.14    0.72 
   0   5  -7    5.91    0.52 
   0   5   7    6.45    0.55 
   0   5   7    7.56    0.61 
  -1  -5  -7   11.44    0.79 
   1  -5   7   11.79    0.89 
  -1  -5  -7   11.88    0.78 
  -1  -5  -7   11.62    0.79 
   1  -5   7   10.21    0.81 
   1  -5   7   11.52    0.76 
   1  -5   7   11.20    0.77 
  -1  -5  -7   10.92    0.85 
  -1   5  -7    9.84    0.89 
   1   5   7   10.71    0.77 
  -1   5  -7    9.60    0.75 
   1   5   7    9.03    0.78 
   1   5   7   10.22    0.72 
  -1   5  -7    9.90    0.69 
   1   5   7    9.58    0.73 
   1   5   7   10.54    0.75 
  -1   5  -7   10.56    0.75 
  -1   5  -7    9.45    0.73 
   1   5   7   10.00    0.76 
  -1   5  -7   10.11    0.75 
  -2  -5  -7    6.30    0.50 
  -2  -5  -7    6.57    0.51 
   2  -5   7    6.51    0.49 
  -2  -5  -7    7.11    0.50 
   2  -5   7    7.13    0.48 
   2  -5   7    7.91    0.54 
   2  -5   7    6.88    0.59 
   2   5   7    5.17    0.48 
  -2   5  -7    6.66    0.53 
   2   5   7    6.47    0.50 
  -2   5  -7    6.61    0.64 
   2   5   7    6.45    0.52 
  -2   5  -7    6.40    0.52 
  -2   5  -7    6.05    0.51 
  -3  -5  -7    5.08    0.41 
   3  -5   7    6.00    0.42 
   3  -5   7    6.58    0.41 
  -3  -5  -7    6.18    0.43 
   3  -5   7    5.96    0.50 
   3  -5   7    5.95    0.41 
  -3  -5  -7    5.88    0.44 
   3   5   7    5.39    0.45 
   3   5   7    6.08    0.47 
  -3   5  -7    6.79    0.60 
  -3   5  -7    5.95    0.47 
  -3   5  -7    5.56    0.47 
  -3   5  -7    6.48    0.49 
  -4   5  -7    4.40    0.40 
  -4   5  -7    5.20    0.36 
  -4  -6   7    0.39    0.10 
  -4  -6   7    0.49    0.12 
  -4  -6   7    0.31    0.07 
   4  -6  -7    0.30    0.07 
  -4   6   7    0.18    0.13 
   4   6  -7    0.26    0.08 
  -4   6   7    0.46    0.21 
  -4   6   7    0.33    0.14 
   4   6  -7    0.31    0.12 
  -4   6   7    0.38    0.14 
  -3  -6   7    4.98    0.39 
   3  -6  -7    5.22    0.38 
   3  -6  -7    4.90    0.37 
  -3  -6   7    5.12    0.40 
  -3  -6   7    5.69    0.43 
   3   6  -7    3.56    0.34 
  -3   6   7    4.26    0.38 
  -3   6   7    3.49    0.35 
  -3   6   7    3.28    0.42 
  -3   6   7    3.53    0.40 
   2  -6  -7    4.40    0.41 
   2  -6  -7    4.30    0.34 
  -2  -6   7    4.10    0.34 
  -2  -6   7    4.03    0.35 
  -2  -6   7    3.77    0.34 
   2  -6  -7    4.16    0.32 
   2   6  -7    3.79    0.32 
  -2   6   7    3.99    0.48 
  -2   6   7    3.23    0.37 
   2   6  -7    3.61    0.32 
  -2   6   7    3.57    0.36 
  -2   6   7    3.61    0.37 
   2   6  -7    3.55    0.36 
  -2   6   7    3.65    0.42 
   2   6  -7    3.44    0.34 
  -1  -6   7   10.80    0.73 
   1  -6  -7    9.50    0.70 
  -1  -6   7   10.67    0.71 
   1  -6  -7   10.56    0.70 
  -1  -6   7    9.84    0.72 
   1  -6  -7   10.46    0.72 
  -1   6   7    7.98    0.63 
   1   6  -7    7.20    0.75 
  -1   6   7    8.74    0.67 
  -1   6   7    8.63    0.65 
   1   6  -7    8.20    0.63 
  -1   6   7    9.02    0.71 
   1   6  -7    9.04    0.59 
  -1   6   7    8.16    0.78 
   1   6  -7    7.34    0.63 
   1   6  -7    9.03    0.64 
   1   6  -7    8.66    0.66 
  -1   6   7    7.90    0.61 
   0  -6  -7    6.71    0.51 
   0  -6  -7    7.22    0.52 
   0  -6   7    7.31    0.50 
   0  -6   7    7.56    0.51 
   0  -6   7    6.44    0.50 
   0  -6   7    6.12    0.59 
   0  -6  -7    7.32    0.50 
   0   6   7    6.18    0.49 
   0   6   7    5.30    0.49 
   0   6  -7    5.08    0.61 
   0   6   7    6.07    0.52 
   0   6   7    6.08    0.42 
   0   6  -7    6.00    0.50 
   0   6  -7    6.23    0.50 
   0   6   7    5.92    0.53 
   0   6  -7    6.35    0.52 
   0   6   7    5.99    0.62 
   1  -6   7   16.62    1.04 
   1  -6   7   16.62    1.06 
   1  -6   7   15.43    1.08 
   1  -6   7   15.85    1.18 
  -1  -6  -7   13.86    1.05 
  -1  -6  -7   17.27    1.06 
  -1   6  -7   13.96    1.11 
  -1   6  -7   12.36    0.94 
   1   6   7   13.47    0.97 
   1   6   7   14.82    0.94 
  -1   6  -7   15.36    0.99 
  -1   6  -7   15.50    0.99 
   1   6   7   15.00    0.98 
   1   6   7   12.58    0.98 
   1   6   7   12.64    0.98 
  -2  -6  -7    1.13    0.16 
   2  -6   7    0.93    0.21 
  -2  -6  -7    0.93    0.14 
   2  -6   7    1.10    0.12 
  -2  -6  -7    0.94    0.14 
   2  -6   7    1.15    0.13 
  -2   6  -7    1.25    0.27 
   2   6   7    0.92    0.18 
  -2   6  -7    0.97    0.17 
  -2   6  -7    0.99    0.19 
   2   6   7    1.08    0.16 
  -2   6  -7    0.93    0.17 
   3  -6   7    7.35    0.47 
  -3  -6  -7    5.88    0.44 
  -3   6  -7    7.26    0.47 
  -3   6  -7    7.38    0.45 
  -3   6  -7    5.57    0.51 
   3   6   7    5.26    0.45 
  -4  -7   7    1.71    0.14 
  -4   7   7    1.10    0.15 
  -4   7   7    1.55    0.14 
  -4   7   7    1.53    0.18 
  -4   7   7    1.39    0.16 
  -3  -7   7    6.90    0.47 
  -3  -7   7    6.24    0.46 
   3   7  -7    5.41    0.38 
  -3   7   7    4.65    0.38 
   3   7  -7    4.40    0.39 
  -3   7   7    5.80    0.40 
   2  -7  -7    2.25    0.19 
   2  -7  -7    1.61    0.26 
  -2  -7   7    2.35    0.21 
  -2  -7   7    2.16    0.23 
  -2  -7   7    2.33    0.20 
  -2   7   7    1.77    0.26 
   2   7  -7    1.97    0.19 
   2   7  -7    1.68    0.21 
  -2   7   7    1.70    0.26 
  -2   7   7    1.88    0.20 
  -1  -7   7    1.04    0.14 
   1  -7  -7    1.14    0.14 
   1  -7  -7    0.69    0.17 
   1  -7  -7    0.57    0.14 
  -1  -7   7    0.89    0.14 
   1  -7  -7    1.03    0.14 
  -1  -7   7    0.89    0.13 
  -1   7   7    0.82    0.16 
   1   7  -7    0.83    0.18 
   1   7  -7    0.94    0.20 
   1   7  -7    0.74    0.17 
  -1   7   7    0.69    0.18 
  -1   7   7    0.72    0.17 
  -1   7   7    0.86    0.21 
   0  -7   7    5.13    0.39 
   0  -7  -7    5.60    0.40 
   0  -7  -7    5.64    0.41 
   0  -7  -7    5.06    0.39 
   0  -7   7    5.70    0.40 
   0  -7   7    5.38    0.39 
   0   7   7    4.23    0.43 
   0   7   7    4.74    0.38 
   0   7  -7    4.66    0.38 
   0   7   7    4.15    0.38 
   0   7   7    4.68    0.41 
   0   7  -7    4.74    0.43 
   0   7  -7    4.90    0.41 
   1  -7   7    5.96    0.43 
   1  -7   7    5.98    0.41 
  -1  -7  -7    5.70    0.42 
  -1  -7  -7    5.64    0.41 
  -1  -7  -7    5.70    0.41 
   1   7   7    3.64    0.34 
   1   7   7    3.74    0.39 
  -1   7  -7    4.30    0.32 
   1   7   7    3.79    0.33 
   1   7   7    4.23    0.34 
  -2  -7  -7    0.32    0.08 
  -2  -7  -7    0.29    0.07 
  -2   7  -7    0.20    0.11 
   2   7   7    0.19    0.07 
  -2   7  -7    0.46    0.11 
   2   7   7    0.25    0.10 
  -2   7  -7    0.24    0.09 
  -2  -8   7    0.98    0.10 
  -2  -8   7    1.08    0.11 
  -2   8   7    0.63    0.12 
  -2   8   7    0.46    0.10 
  -2   8   7    0.65    0.13 
  -2   8   7    0.59    0.10 
  -1  -8   7    0.21    0.06 
   1   8  -7    0.20    0.07 
  -1   8   7    0.13    0.08 
  -1   8   7    0.13    0.09 
  -1   8   7    0.14    0.09 
  -1   8   7    0.16    0.08 
   1   8  -7    0.20    0.08 
   1   8  -7    0.20    0.07 
   0  -8  -7   11.47    0.75 
   0   8  -7    6.94    0.47 
   0   8   7    6.20    0.49 
   0   8   7    6.33    0.48 
   0   8   7    7.06    0.48 
  -1   8  -7    1.45    0.14 
  -1   8  -7    1.22    0.13 
   6   0  -8    0.54    0.10 
  -6   0   8    0.53    0.15 
   5   0  -8    1.41    0.25 
   5   0  -8    1.73    0.18 
   5   0  -8    1.91    0.20 
  -5   0   8    1.81    0.27 
   4   0  -8   54.94    3.48 
  -4   0   8   49.77    3.52 
   4   0  -8   53.59    3.45 
   4   0  -8   56.50    3.52 
  -4   0   8   56.79    3.63 
  -4   0   8   53.93    3.48 
   4   0  -8   52.70    3.45 
   4   0  -8   53.61    3.52 
  -4   0   8   53.99    3.47 
   4   0  -8   52.80    3.58 
  -4   0   8   53.98    3.67 
   4   0  -8   56.27    3.44 
   3   0  -8   25.34    1.71 
  -3   0   8   27.49    1.90 
   3   0  -8   25.33    1.69 
  -3   0   8   24.83    1.83 
   3   0  -8   24.94    1.75 
  -3   0   8   27.11    1.74 
   3   0  -8   26.51    1.89 
   3   0  -8   24.33    1.74 
   3   0  -8   25.03    1.68 
  -3   0   8   28.92    1.86 
  -3   0   8   24.42    1.66 
   3   0  -8   26.14    1.83 
   3   0  -8   26.28    1.89 
   2   0  -8    2.10    0.21 
   2   0  -8    2.31    0.22 
   2   0  -8    2.14    0.35 
   2   0  -8    2.01    0.20 
   2   0  -8    1.87    0.35 
  -2   0   8    2.29    0.27 
  -2   0   8    2.21    0.20 
   2   0  -8    2.59    0.27 
   2   0  -8    1.79    0.27 
   2   0  -8    2.47    0.34 
   2   0  -8    2.05    0.30 
  -2   0   8    2.14    0.30 
  -2   0   8    2.47    0.37 
  -2   0   8    2.65    0.37 
   2   0  -8    2.37    0.30 
  -2   0   8    1.88    0.28 
  -1   0   8   21.05    1.44 
   1   0  -8   22.19    1.41 
   1   0  -8   20.49    1.35 
   1   0  -8   18.14    1.51 
  -1   0   8   20.57    1.49 
  -1   0   8   21.01    1.52 
  -1   0   8   19.66    1.33 
   1   0  -8   22.20    1.42 
  -1   0   8   22.18    1.41 
  -1   0   8   21.18    1.42 
   1   0  -8   21.40    1.51 
   1   0  -8   20.81    1.35 
  -1   0   8   20.90    1.35 
  -1   0   8   19.14    1.34 
   1   0  -8   23.28    1.49 
   1   0  -8   20.08    1.37 
   1   0  -8   19.40    1.34 
  -1   0   8   19.75    1.44 
   0   0  -8   15.38    1.01 
   0   0   8   16.30    1.14 
   0   0  -8   14.59    0.99 
   0   0  -8   14.56    1.00 
   0   0  -8   13.61    1.05 
   0   0   8   16.65    1.00 
   0   0   8   16.36    1.10 
   0   0  -8   16.67    1.13 
   0   0   8   14.58    0.99 
   0   0   8   16.63    1.10 
   0   0  -8   15.72    1.04 
   0   0   8   14.98    1.00 
   0   0   8   14.21    1.14 
   0   0   8   13.17    1.06 
   0   0  -8   16.29    1.08 
   0   0  -8   14.74    1.15 
   0   0  -8   15.32    1.18 
   0   0   8   14.59    1.06 
  -1   0  -8    1.02    0.21 
   1   0   8    1.49    0.32 
  -1   0  -8    1.16    0.21 
  -1   0  -8    1.09    0.20 
  -1   0  -8    1.01    0.14 
  -1   0  -8    0.91    0.15 
  -1   0  -8    1.03    0.24 
   1   0   8    0.69    0.17 
   1   0   8    1.00    0.13 
  -1   0  -8    0.87    0.30 
   1   0   8    1.08    0.23 
   1   0   8    0.75    0.18 
   1   0   8    1.26    0.14 
   1   0   8    0.83    0.20 
   1   0   8    1.28    0.14 
  -2   0  -8    0.06    0.11 
   2   0   8    0.09    0.09 
   2   0   8   -0.01    0.15 
  -2   0  -8   -0.31    0.45 
  -2   0  -8    0.06    0.14 
   2   0   8    0.15    0.07 
  -2   0  -8    0.06    0.13 
   2   0   8    0.04    0.12 
   2   0   8   -0.36    0.25 
   2   0   8    0.29    0.18 
   2   0   8    0.04    0.11 
  -2   0  -8   -0.01    0.07 
  -3   0  -8   17.60    1.18 
   3   0   8   18.43    1.18 
   3   0   8   17.66    1.23 
   3   0   8   14.92    1.13 
   3   0   8   16.79    1.13 
   3   0   8   15.81    1.29 
  -3   0  -8   20.00    1.26 
   4   0   8    1.16    0.14 
   4   0   8    1.51    0.15 
  -4   0  -8    1.79    0.21 
   4   0   8    1.56    0.31 
   5   0   8    7.98    0.53 
   6  -1  -8    0.30    0.06 
  -6  -1   8    0.35    0.13 
   6  -1  -8    0.31    0.08 
  -6   1   8    0.39    0.09 
  -6   1   8    0.35    0.16 
   6   1  -8    0.35    0.07 
  -5  -1   8   17.43    1.23 
  -5  -1   8   19.87    1.34 
   5  -1  -8   16.79    1.18 
   5  -1  -8   16.08    1.16 
   5   1  -8   19.14    1.34 
  -5   1   8   17.39    1.24 
  -5   1   8   17.68    1.24 
   5   1  -8   20.14    1.31 
  -5   1   8   16.53    1.21 
   4  -1  -8   15.99    1.10 
  -4  -1   8   14.68    1.15 
   4  -1  -8   15.44    1.15 
   4  -1  -8   15.79    1.13 
   4  -1  -8   16.71    1.07 
  -4  -1   8   16.68    1.29 
  -4  -1   8   15.76    1.23 
   4  -1  -8   15.48    1.07 
   4  -1  -8   16.10    1.08 
  -4  -1   8   15.78    1.04 
  -4  -1   8   16.85    1.13 
   4  -1  -8   15.48    1.19 
  -4   1   8   13.80    1.02 
   4   1  -8   15.02    1.13 
  -4   1   8   13.41    1.03 
   4   1  -8   15.81    1.07 
  -4   1   8   14.38    1.07 
   4   1  -8   15.48    1.00 
   4   1  -8   13.64    0.98 
   4   1  -8   15.40    1.08 
   4   1  -8   13.30    1.07 
   4   1  -8   15.67    1.07 
  -4   1   8   14.62    1.06 
  -4   1   8   14.26    1.19 
  -4   1   8   16.71    1.16 
   3  -1  -8    3.05    0.32 
   3  -1  -8    2.68    0.34 
   3  -1  -8    2.82    0.28 
  -3  -1   8    2.97    0.45 
   3  -1  -8    2.66    0.26 
   3  -1  -8    3.02    0.45 
   3  -1  -8    2.89    0.46 
  -3  -1   8    3.13    0.34 
  -3  -1   8    2.54    0.44 
  -3  -1   8    2.78    0.43 
   3  -1  -8    3.29    0.31 
   3  -1  -8    2.86    0.27 
  -3  -1   8    2.77    0.42 
   3  -1  -8    2.87    0.40 
   3   1  -8    2.20    0.32 
   3   1  -8    2.65    0.41 
   3   1  -8    2.31    0.32 
   3   1  -8    2.39    0.45 
  -3   1   8    3.29    0.44 
   3   1  -8    2.58    0.23 
  -3   1   8    2.40    0.34 
   3   1  -8    2.29    0.27 
   3   1  -8    2.75    0.24 
   3   1  -8    2.68    0.29 
  -3   1   8    2.70    0.26 
  -3   1   8    2.56    0.40 
  -3   1   8    2.86    0.42 
   3   1  -8    2.78    0.25 
  -3   1   8    2.34    0.27 
  -3   1   8    2.04    0.25 
   3   1  -8    2.78    0.38 
  -3   1   8    2.58    0.44 
  -2  -1   8   19.94    1.40 
   2  -1  -8   20.96    1.46 
  -2  -1   8   18.58    1.30 
  -2  -1   8   18.36    1.29 
   2  -1  -8   22.83    1.39 
   2  -1  -8   20.88    1.33 
   2  -1  -8   19.18    1.36 
   2  -1  -8   20.06    1.31 
  -2  -1   8   19.85    1.49 
   2  -1  -8   19.88    1.30 
  -2  -1   8   19.92    1.31 
   2  -1  -8   18.43    1.46 
  -2  -1   8   19.85    1.37 
  -2  -1   8   18.65    1.43 
   2  -1  -8   19.56    1.31 
  -2  -1   8   21.76    1.40 
  -2  -1   8   20.96    1.49 
   2   1  -8   15.85    1.30 
   2   1  -8   18.14    1.22 
  -2   1   8   19.19    1.41 
   2   1  -8   19.35    1.42 
  -2   1   8   20.13    1.35 
   2   1  -8   19.91    1.36 
  -2   1   8   19.31    1.28 
   2   1  -8   17.96    1.25 
  -2   1   8   17.23    1.29 
  -2   1   8   19.85    1.41 
  -2   1   8   18.30    1.35 
  -2   1   8   18.91    1.26 
   2   1  -8   19.87    1.29 
   2   1  -8   18.07    1.23 
   2   1  -8   18.72    1.30 
   2   1  -8   16.53    1.22 
   2   1  -8   20.97    1.39 
  -2   1   8   20.34    1.33 
   1  -1  -8   15.58    1.08 
  -1  -1   8   15.26    1.13 
   1  -1  -8   18.31    1.23 
   1  -1  -8   16.63    1.15 
  -1  -1   8   16.73    1.17 
   1  -1  -8   15.45    1.15 
  -1  -1   8   16.53    1.08 
   1  -1  -8   15.96    1.16 
  -1  -1   8   16.30    1.09 
  -1  -1   8   15.73    1.20 
  -1  -1   8   17.90    1.24 
  -1  -1   8   18.61    1.24 
   1  -1  -8   17.30    1.09 
  -1  -1   8   16.73    1.09 
  -1  -1   8   13.78    1.19 
   1  -1  -8   16.66    1.28 
   1  -1  -8   16.32    1.09 
   1   1  -8   16.87    1.17 
   1   1  -8   15.53    1.06 
  -1   1   8   13.89    1.07 
  -1   1   8   14.20    1.16 
   1   1  -8   15.01    1.02 
   1   1  -8   15.92    1.09 
   1   1  -8   15.92    1.21 
  -1   1   8   16.84    1.12 
   1   1  -8   13.96    1.01 
  -1   1   8   14.34    1.11 
   1   1  -8   17.14    1.08 
  -1   1   8   15.99    1.09 
   1   1  -8   15.24    1.12 
  -1   1   8   16.17    1.17 
  -1   1   8   15.59    1.02 
   0  -1   8    2.56    0.33 
   0  -1  -8    2.16    0.24 
   0  -1  -8    1.57    0.35 
   0  -1  -8    2.31    0.21 
   0  -1   8    2.37    0.29 
   0  -1   8    2.09    0.19 
   0  -1   8    2.13    0.20 
   0  -1  -8    1.82    0.24 
   0  -1  -8    2.27    0.30 
   0  -1   8    2.29    0.20 
   0  -1  -8    2.12    0.28 
   0  -1   8    2.40    0.35 
   0  -1   8    2.21    0.34 
   0  -1   8    2.12    0.29 
   0  -1  -8    2.32    0.22 
   0  -1  -8    2.24    0.20 
   0   1  -8    2.02    0.45 
   0   1  -8    2.23    0.19 
   0   1  -8    2.14    0.30 
   0   1   8    2.40    0.31 
   0   1   8    2.14    0.26 
   0   1   8    2.11    0.19 
   0   1   8    2.11    0.28 
   0   1   8    2.36    0.35 
   0   1  -8    1.98    0.34 
   0   1   8    2.22    0.28 
   0   1  -8    2.10    0.26 
   0   1  -8    1.97    0.25 
   0   1  -8    2.06    0.25 
   0   1   8    2.15    0.28 
   0   1   8    2.07    0.32 
   1  -1   8   12.63    0.97 
   1  -1   8   13.90    0.86 
  -1  -1  -8   12.59    0.97 
   1  -1   8   12.68    1.06 
   1  -1   8   12.88    0.93 
  -1  -1  -8   12.90    0.96 
   1  -1   8   12.42    0.84 
   1  -1   8   12.69    0.85 
  -1  -1  -8   12.02    0.85 
  -1  -1  -8   12.89    0.91 
  -1  -1  -8   11.60    0.91 
   1  -1   8   14.98    0.98 
  -1  -1  -8   11.70    0.86 
  -1  -1  -8   11.99    0.85 
  -1  -1  -8   13.10    1.14 
  -1  -1  -8   13.56    0.86 
  -1   1  -8   11.42    0.86 
   1   1   8   12.40    1.01 
   1   1   8   12.42    0.92 
   1   1   8   11.87    0.84 
  -1   1  -8   11.29    0.90 
   1   1   8   13.97    0.90 
  -1   1  -8   11.68    0.96 
   1   1   8   12.75    0.93 
   1   1   8   10.84    0.79 
   1   1   8   12.19    0.80 
   1   1   8   12.04    0.93 
  -1   1  -8   12.74    0.88 
  -1   1  -8   12.83    0.85 
  -1   1  -8   11.98    0.89 
   1   1   8   10.82    0.86 
  -1   1  -8   11.97    0.79 
   2  -1   8   11.62    0.85 
   2  -1   8    9.20    0.97 
  -2  -1  -8    8.93    1.08 
  -2  -1  -8   10.21    0.84 
   2  -1   8   11.08    0.72 
   2  -1   8   11.84    0.73 
   2  -1   8   10.82    0.73 
   2  -1   8   11.03    0.89 
  -2  -1  -8   10.85    0.73 
  -2  -1  -8   10.34    0.76 
   2  -1   8   10.95    0.85 
  -2  -1  -8   10.22    0.79 
  -2   1  -8    9.96    0.73 
   2   1   8    8.86    0.74 
   2   1   8   11.41    0.68 
  -2   1  -8   10.25    0.77 
   2   1   8    9.44    0.76 
  -2   1  -8    9.62    0.81 
   2   1   8   10.28    0.82 
   2   1   8    9.24    0.93 
   3  -1   8    2.56    0.58 
   3  -1   8    1.79    0.18 
   3  -1   8    2.37    0.31 
   3  -1   8    1.72    0.19 
  -3  -1  -8    2.07    0.28 
   3  -1   8    1.97    0.20 
  -3  -1  -8    1.84    0.23 
  -3   1  -8    1.71    0.24 
  -3   1  -8    1.80    0.27 
   3   1   8    1.98    0.19 
   3   1   8    1.59    0.26 
   3   1   8    1.58    0.27 
   3   1   8    1.50    0.28 
   4  -1   8    4.62    0.35 
   4  -1   8    4.20    0.41 
   4  -1   8    4.13    0.32 
   4  -1   8    4.53    0.32 
  -4  -1  -8    4.33    0.35 
   4   1   8    3.64    0.31 
  -4   1  -8    4.43    0.34 
   6  -2  -8    0.07    0.06 
  -6  -2   8    0.12    0.10 
  -6   2   8    0.09    0.11 
   5  -2  -8    9.74    0.67 
  -5  -2   8    8.86    0.73 
   5  -2  -8   10.48    0.67 
  -5  -2   8    8.48    0.83 
   5  -2  -8    9.91    0.67 
  -5   2   8    8.87    0.66 
   5   2  -8    8.32    0.57 
   5   2  -8    8.74    0.65 
   5   2  -8    7.56    0.67 
  -5   2   8    7.73    0.61 
  -5   2   8    9.15    0.62 
  -4  -2   8    0.98    0.15 
   4  -2  -8    1.28    0.23 
  -4  -2   8    0.72    0.22 
  -4  -2   8    0.67    0.19 
   4  -2  -8    0.93    0.14 
   4  -2  -8    0.57    0.18 
   4  -2  -8    1.08    0.17 
   4  -2  -8    1.15    0.16 
  -4  -2   8    1.38    0.23 
   4  -2  -8    1.14    0.25 
   4  -2  -8    1.20    0.18 
  -4  -2   8    0.72    0.26 
   4   2  -8    1.30    0.25 
  -4   2   8    1.32    0.22 
  -4   2   8    0.90    0.51 
  -4   2   8    1.14    0.22 
  -4   2   8    0.88    0.23 
  -4   2   8    0.29    0.21 
  -4   2   8    1.28    0.30 
  -4   2   8    1.14    0.26 
   4   2  -8    1.10    0.27 
  -4   2   8    0.96    0.27 
   4   2  -8    1.11    0.15 
  -4   2   8    1.00    0.25 
   4   2  -8    0.92    0.23 
  -3  -2   8   20.65    1.35 
   3  -2  -8   18.16    1.40 
   3  -2  -8   19.68    1.41 
  -3  -2   8   19.26    1.48 
  -3  -2   8   19.47    1.53 
  -3  -2   8   20.92    1.55 
   3  -2  -8   21.94    1.57 
   3  -2  -8   24.01    1.76 
   3  -2  -8   20.92    1.36 
   3  -2  -8   19.89    1.35 
   3  -2  -8   21.52    1.50 
  -3  -2   8   18.11    1.49 
   3  -2  -8   20.76    1.34 
   3  -2  -8   20.03    1.37 
   3   2  -8   18.41    1.21 
  -3   2   8   17.63    1.27 
  -3   2   8   19.79    1.38 
   3   2  -8   17.77    1.37 
  -3   2   8   20.20    1.27 
   3   2  -8   16.31    1.32 
  -3   2   8   16.88    1.34 
  -3   2   8   19.75    1.41 
   3   2  -8   19.53    1.31 
   3   2  -8   17.38    1.30 
  -3   2   8   20.32    1.38 
  -3   2   8   16.04    1.24 
  -3   2   8   19.09    1.31 
  -2  -2   8   36.52    2.37 
  -2  -2   8   29.57    2.27 
  -2  -2   8   31.93    2.54 
  -2  -2   8   34.57    2.27 
   2  -2  -8   35.62    2.29 
   2  -2  -8   34.88    2.34 
  -2  -2   8   34.20    2.47 
   2  -2  -8   37.13    2.36 
   2  -2  -8   35.81    2.28 
   2  -2  -8   34.09    2.44 
   2  -2  -8   39.10    2.44 
  -2  -2   8   36.06    2.41 
  -2  -2   8   37.19    2.29 
   2  -2  -8   34.86    2.30 
   2  -2  -8   35.55    2.27 
   2  -2  -8   36.36    2.53 
  -2  -2   8   38.94    2.48 
   2   2  -8   28.99    2.17 
  -2   2   8   34.80    2.28 
  -2   2   8   32.74    2.22 
  -2   2   8   34.84    2.23 
   2   2  -8   32.58    2.18 
  -2   2   8   35.51    2.20 
  -2   2   8   30.84    2.15 
  -2   2   8   34.26    2.27 
  -2   2   8   34.58    2.15 
   2   2  -8   35.06    2.27 
  -2   2   8   27.41    2.12 
  -2   2   8   30.86    2.09 
   2   2  -8   30.63    2.09 
   2   2  -8   35.52    2.16 
   1  -2  -8   11.23    0.96 
   1  -2  -8   10.60    0.73 
   1  -2  -8   10.09    0.75 
  -1  -2   8   10.31    0.73 
  -1  -2   8   10.92    0.91 
  -1  -2   8   10.90    0.82 
  -1  -2   8   10.05    0.72 
   1  -2  -8   10.60    0.80 
   1  -2  -8   10.48    0.72 
  -1  -2   8   10.49    0.78 
  -1  -2   8   10.65    0.84 
  -1  -2   8   10.52    0.92 
   1  -2  -8   10.61    0.80 
  -1  -2   8   11.27    0.89 
   1  -2  -8   10.62    0.74 
  -1  -2   8   11.10    0.74 
  -1   2   8    8.95    0.74 
  -1   2   8    9.13    0.73 
  -1   2   8    9.46    0.77 
   1   2  -8    9.27    0.84 
  -1   2   8    9.86    0.70 
   1   2  -8    9.28    0.72 
   1   2  -8    8.94    0.63 
  -1   2   8    9.17    0.69 
  -1   2   8   10.53    0.75 
  -1   2   8    9.05    0.71 
   1   2  -8   10.17    0.70 
   1   2  -8   10.48    0.80 
   1   2  -8    9.27    0.72 
   0  -2  -8    3.25    0.28 
   0  -2  -8    2.89    0.35 
   0  -2   8    3.10    0.27 
   0  -2  -8    2.65    0.48 
   0  -2   8    3.31    0.32 
   0  -2   8    3.13    0.25 
   0  -2  -8    3.12    0.34 
   0  -2   8    3.10    0.35 
   0  -2   8    2.94    0.44 
   0  -2   8    3.45    0.38 
   0  -2   8    3.51    0.40 
   0  -2  -8    3.20    0.27 
   0  -2   8    2.96    0.26 
   0  -2  -8    3.32    0.28 
   0  -2  -8    3.02    0.31 
   0   2  -8    3.05    0.28 
   0   2   8    2.72    0.22 
   0   2   8    2.76    0.31 
   0   2   8    2.28    0.30 
   0   2   8    2.40    0.40 
   0   2   8    2.87    0.28 
   0   2  -8    2.51    0.31 
   0   2  -8    2.81    0.42 
   0   2   8    2.64    0.34 
   0   2  -8    2.95    0.34 
   0   2   8    2.77    0.31 
   0   2   8    3.05    0.34 
  -1  -2  -8    0.94    0.16 
   1  -2   8    0.54    0.17 
  -1  -2  -8    0.51    0.14 
  -1  -2  -8    0.65    0.16 
   1  -2   8    1.14    0.18 
  -1  -2  -8    0.96    0.15 
   1  -2   8    0.96    0.13 
  -1  -2  -8    0.49    0.26 
  -1  -2  -8    0.73    0.16 
  -1  -2  -8    1.14    0.16 
   1  -2   8    0.96    0.14 
   1  -2   8    0.98    0.19 
  -1  -2  -8    0.93    0.15 
  -1  -2  -8    0.61    0.18 
   1  -2   8    1.30    0.36 
   1  -2   8    1.24    0.27 
   1   2   8    0.89    0.20 
  -1   2  -8    1.00    0.32 
   1   2   8    0.84    0.12 
   1   2   8    0.69    0.17 
   1   2   8    0.33    0.23 
  -1   2  -8    0.70    0.20 
   1   2   8    0.54    0.12 
  -1   2  -8    0.93    0.19 
  -1   2  -8    0.75    0.16 
  -1   2  -8    0.81    0.13 
  -2  -2  -8   21.35    1.53 
  -2  -2  -8   20.48    1.60 
   2  -2   8   25.08    1.60 
   2  -2   8   22.56    1.48 
   2  -2   8   21.26    1.62 
  -2  -2  -8   23.42    1.50 
   2  -2   8   22.72    1.57 
  -2  -2  -8   22.65    1.48 
  -2  -2  -8   20.86    1.52 
   2  -2   8   23.79    1.47 
   2  -2   8   24.01    1.47 
   2   2   8   20.33    1.42 
   2   2   8   21.38    1.48 
  -2   2  -8   21.96    1.44 
   2   2   8   20.81    1.35 
  -2   2  -8   20.57    1.40 
  -2   2  -8   19.94    1.51 
   3  -2   8   31.41    1.97 
   3  -2   8   30.62    1.97 
   3  -2   8   30.05    1.98 
  -3  -2  -8   28.02    1.96 
   3  -2   8   34.20    2.10 
  -3  -2  -8   29.68    2.03 
  -3  -2  -8   31.62    2.00 
  -3   2  -8   23.65    1.87 
   3   2   8   28.88    1.84 
  -3   2  -8   29.78    1.85 
  -3   2  -8   27.12    1.85 
   3   2   8   26.93    1.75 
  -3   2  -8   28.51    1.80 
   4  -2   8    5.05    0.39 
   4  -2   8    5.85    0.43 
  -4  -2  -8    6.03    0.46 
   4  -2   8    6.07    0.51 
  -4  -2  -8    5.43    0.41 
   4  -2   8    4.94    0.38 
   4   2   8    4.89    0.41 
   4   2   8    4.46    0.33 
  -4   2  -8    5.65    0.46 
  -4   2  -8    4.94    0.38 
   6  -3  -8   18.00    1.22 
  -6  -3   8   20.28    1.26 
  -6   3   8   14.29    0.91 
  -6   3   8   13.50    0.99 
   5  -3  -8   10.53    0.77 
  -5  -3   8   11.25    0.83 
  -5  -3   8   10.44    0.72 
   5  -3  -8   12.25    0.76 
   5  -3  -8   11.18    0.76 
  -5   3   8    9.10    0.75 
  -5   3   8    9.08    0.69 
  -5   3   8   10.27    0.78 
  -5   3   8   11.15    0.74 
  -5   3   8    8.79    0.78 
   4  -3  -8   14.72    0.99 
  -4  -3   8   14.64    0.99 
  -4  -3   8   15.37    1.09 
   4  -3  -8   16.69    1.00 
   4  -3  -8   14.08    0.99 
  -4  -3   8   14.16    1.12 
   4  -3  -8   14.97    1.01 
   4  -3  -8   13.80    1.03 
  -4  -3   8   13.11    1.06 
  -4  -3   8   14.95    1.17 
   4  -3  -8   14.62    1.09 
  -4   3   8   14.14    1.04 
  -4   3   8   12.14    1.05 
  -4   3   8   13.55    0.98 
   4   3  -8   13.62    1.02 
  -4   3   8   14.21    0.95 
   4   3  -8   14.71    1.09 
   4   3  -8   15.45    1.03 
   4   3  -8   12.66    0.98 
   4   3  -8   13.76    0.90 
  -4   3   8   14.51    1.09 
   3  -3  -8    5.56    0.44 
   3  -3  -8    5.95    0.49 
  -3  -3   8    5.08    0.41 
  -3  -3   8    5.51    0.60 
  -3  -3   8    5.60    0.53 
   3  -3  -8    5.87    0.42 
  -3  -3   8    4.80    0.51 
  -3  -3   8    4.87    0.56 
   3  -3  -8    5.41    0.55 
  -3  -3   8    5.91    0.52 
  -3  -3   8    4.90    0.41 
   3  -3  -8    5.88    0.43 
  -3  -3   8    5.46    0.44 
   3  -3  -8    5.60    0.43 
  -3   3   8    5.15    0.55 
   3   3  -8    4.89    0.49 
  -3   3   8    4.96    0.44 
  -3   3   8    5.11    0.44 
  -3   3   8    5.30    0.54 
  -3   3   8    4.49    0.50 
  -3   3   8    5.32    0.45 
   3   3  -8    4.99    0.43 
   3   3  -8    5.14    0.54 
   3   3  -8    4.84    0.36 
   3   3  -8    5.90    0.51 
  -3   3   8    5.19    0.48 
  -3   3   8    6.05    0.57 
   2  -3  -8    3.51    0.38 
  -2  -3   8    3.67    0.47 
  -2  -3   8    3.63    0.32 
   2  -3  -8    3.54    0.38 
   2  -3  -8    3.39    0.32 
  -2  -3   8    3.04    0.39 
  -2  -3   8    3.48    0.35 
   2  -3  -8    3.87    0.32 
   2  -3  -8    3.69    0.30 
  -2  -3   8    3.46    0.50 
  -2  -3   8    2.46    0.45 
   2  -3  -8    3.68    0.34 
  -2  -3   8    3.65    0.30 
  -2  -3   8    3.89    0.31 
  -2  -3   8    3.04    0.43 
   2  -3  -8    3.37    0.53 
  -2   3   8    3.35    0.34 
  -2   3   8    3.46    0.40 
  -2   3   8    3.08    0.37 
   2   3  -8    3.32    0.30 
  -2   3   8    3.22    0.34 
   2   3  -8    3.08    0.39 
  -2   3   8    3.43    0.45 
  -2   3   8    2.92    0.37 
   2   3  -8    2.98    0.35 
  -2   3   8    3.56    0.38 
   2   3  -8    2.87    0.28 
   2   3  -8    2.86    0.36 
  -1  -3   8    7.15    0.51 
  -1  -3   8    6.44    0.68 
  -1  -3   8    7.14    0.52 
   1  -3  -8    6.86    0.50 
  -1  -3   8    7.25    0.67 
   1  -3  -8    6.93    0.52 
  -1  -3   8    6.91    0.61 
  -1  -3   8    7.54    0.55 
   1  -3  -8    7.33    0.60 
  -1  -3   8    6.53    0.67 
  -1  -3   8    7.25    0.64 
   1  -3  -8    6.92    0.52 
   1  -3  -8    6.40    0.54 
   1  -3  -8    7.27    0.77 
   1  -3  -8    7.44    0.61 
  -1   3   8    5.76    0.45 
   1   3  -8    5.51    0.49 
   1   3  -8    4.81    0.83 
   1   3  -8    6.33    0.44 
  -1   3   8    5.99    0.52 
   1   3  -8    6.40    0.56 
  -1   3   8    5.12    0.65 
  -1   3   8    6.46    0.49 
  -1   3   8    5.05    0.45 
   0  -3   8    6.62    0.61 
   0  -3  -8    6.28    0.50 
   0  -3   8    6.12    0.56 
   0  -3  -8    6.53    0.55 
   0  -3  -8    6.13    0.57 
   0  -3  -8    5.68    0.72 
   0  -3  -8    6.50    0.47 
   0  -3   8    5.23    0.61 
   0  -3   8    6.32    0.44 
   0  -3   8    6.33    0.58 
   0  -3  -8    6.17    0.50 
   0  -3   8    5.79    0.67 
   0  -3  -8    6.15    0.46 
   0  -3   8    6.02    0.52 
   0  -3   8    5.94    0.45 
   0   3  -8    5.54    0.46 
   0   3  -8    5.48    0.62 
   0   3   8    5.35    0.45 
   0   3  -8    6.46    0.49 
   0   3   8    5.00    0.44 
   0   3   8    6.40    0.53 
   0   3  -8    6.01    0.53 
   0   3   8    5.61    0.48 
   0   3  -8    5.56    0.48 
   0   3   8    5.70    0.47 
  -1  -3  -8    0.91    0.14 
  -1  -3  -8    0.77    0.14 
   1  -3   8    0.29    0.34 
  -1  -3  -8    0.96    0.17 
  -1  -3  -8    0.01    0.19 
  -1  -3  -8    0.59    0.20 
   1  -3   8    0.98    0.14 
   1  -3   8    0.89    0.14 
  -1  -3  -8    0.14    0.21 
   1  -3   8    0.46    0.16 
   1  -3   8    0.54    0.10 
  -1  -3  -8    0.73    0.13 
  -1  -3  -8    0.60    0.16 
   1  -3   8    0.66    0.27 
   1  -3   8    0.47    0.15 
   1   3   8    0.86    0.21 
   1   3   8    0.63    0.14 
  -1   3  -8    0.62    0.25 
   1   3   8    0.74    0.17 
  -1   3  -8    0.88    0.20 
  -1   3  -8    0.59    0.19 
  -1   3  -8    1.08    0.20 
  -2  -3  -8    8.17    0.63 
   2  -3   8    9.92    0.76 
   2  -3   8    9.86    0.64 
  -2  -3  -8    9.36    0.64 
   2  -3   8    9.76    0.62 
  -2  -3  -8    8.56    0.64 
  -2  -3  -8    8.03    0.69 
   2  -3   8    9.70    0.63 
   2  -3   8    8.62    0.71 
  -2  -3  -8    7.95    0.76 
   2   3   8    7.70    0.68 
  -2   3  -8    9.05    0.68 
   2   3   8    8.22    0.64 
  -2   3  -8    9.04    0.69 
  -2   3  -8    9.01    0.79 
   2   3   8    8.91    0.67 
  -3  -3  -8    3.89    0.40 
  -3  -3  -8    4.47    0.34 
   3  -3   8    4.89    0.34 
  -3  -3  -8    5.28    0.43 
   3  -3   8    4.86    0.35 
   3  -3   8    4.29    0.34 
   3  -3   8    4.77    0.46 
  -3   3  -8    4.96    0.44 
  -3   3  -8    4.27    0.41 
   3   3   8    4.77    0.42 
   4  -3   8    1.26    0.13 
  -4  -3  -8    1.37    0.15 
   4  -3   8    1.21    0.13 
  -4  -3  -8    1.60    0.23 
  -4   3  -8    0.99    0.15 
   4   3   8    1.07    0.18 
  -4   3  -8    1.36    0.18 
  -5  -4   8    0.91    0.11 
   5  -4  -8    1.24    0.17 
  -5  -4   8    1.26    0.20 
   5  -4  -8    1.00    0.14 
   5  -4  -8    0.97    0.12 
  -5   4   8    0.69    0.19 
  -5   4   8    0.76    0.16 
   5   4  -8    0.89    0.17 
  -5   4   8    0.87    0.16 
  -5   4   8    0.70    0.18 
  -4  -4   8    3.03    0.39 
  -4  -4   8    2.77    0.26 
   4  -4  -8    3.55    0.29 
   4  -4  -8    3.67    0.30 
   4  -4  -8    3.89    0.29 
  -4  -4   8    2.90    0.43 
  -4  -4   8    3.61    0.32 
  -4  -4   8    3.79    0.30 
  -4   4   8    3.74    0.44 
   4   4  -8    3.26    0.35 
  -4   4   8    2.99    0.38 
  -4   4   8    3.37    0.33 
   4   4  -8    3.44    0.41 
   4   4  -8    3.56    0.36 
  -4   4   8    3.43    0.39 
   3  -4  -8   39.00    2.49 
  -3  -4   8   42.23    2.76 
  -3  -4   8   40.96    2.71 
  -3  -4   8   38.20    2.50 
   3  -4  -8   43.18    2.59 
   3  -4  -8   39.29    2.48 
   3  -4  -8   36.17    2.60 
   3  -4  -8   37.95    2.52 
   3  -4  -8   32.16    2.52 
  -3   4   8   29.24    2.24 
   3   4  -8   35.02    2.27 
  -3   4   8   32.54    2.28 
  -3   4   8   34.73    2.29 
   3   4  -8   35.75    2.28 
  -3   4   8   31.70    2.23 
  -3   4   8   32.93    2.36 
  -3   4   8   37.73    2.34 
   3   4  -8   35.10    2.36 
   2  -4  -8   21.91    1.37 
   2  -4  -8   20.85    1.40 
   2  -4  -8   21.32    1.46 
  -2  -4   8   19.57    1.54 
   2  -4  -8   21.50    1.39 
  -2  -4   8   19.89    1.50 
  -2  -4   8   21.85    1.40 
  -2  -4   8   20.82    1.44 
  -2  -4   8   20.92    1.40 
   2  -4  -8   20.85    1.38 
  -2  -4   8   18.69    1.47 
  -2  -4   8   22.23    1.38 
  -2   4   8   18.70    1.29 
   2   4  -8   17.71    1.29 
  -2   4   8   19.38    1.36 
  -2   4   8   17.57    1.27 
  -2   4   8   17.93    1.25 
   2   4  -8   15.82    1.23 
  -2   4   8   20.00    1.45 
  -2   4   8   19.47    1.32 
   2   4  -8   19.22    1.39 
   2   4  -8   20.26    1.33 
   1  -4  -8   27.67    1.89 
  -1  -4   8   30.42    1.86 
  -1  -4   8   25.96    2.05 
   1  -4  -8   29.83    1.86 
  -1  -4   8   31.03    2.09 
   1  -4  -8   27.04    2.20 
   1  -4  -8   28.76    1.87 
  -1  -4   8   27.56    1.98 
   1  -4  -8   27.64    2.21 
   1  -4  -8   28.36    1.87 
  -1  -4   8   28.57    1.87 
  -1  -4   8   26.92    2.07 
   1  -4  -8   30.58    1.96 
  -1  -4   8   29.86    2.04 
  -1  -4   8   29.71    1.88 
  -1   4   8   24.05    1.66 
   1   4  -8   24.10    1.65 
  -1   4   8   24.95    1.64 
   1   4  -8   23.03    1.63 
   1   4  -8   23.94    1.67 
   1   4  -8   24.63    1.83 
  -1   4   8   27.77    1.70 
  -1   4   8   26.38    1.71 
   1   4  -8   21.83    1.62 
  -1   4   8   22.04    1.61 
   1   4  -8   26.97    1.76 
  -1   4   8   24.61    1.63 
   0  -4  -8   12.28    0.82 
   0  -4  -8   11.64    0.80 
   0  -4  -8   11.60    0.82 
   0  -4   8   11.34    0.80 
   0  -4   8   12.89    0.81 
   0  -4   8   10.02    0.94 
   0  -4   8   11.84    0.79 
   0  -4   8   12.54    0.93 
   0  -4   8   12.61    0.97 
   0  -4   8   12.37    0.87 
   0  -4  -8   10.68    0.92 
   0  -4  -8   10.45    0.85 
   0   4  -8    9.76    0.92 
   0   4   8    9.72    0.74 
   0   4   8   10.18    0.76 
   0   4  -8    9.47    0.80 
   0   4   8    9.94    0.78 
   0   4  -8   10.62    0.75 
   0   4   8   10.67    0.75 
   0   4   8   11.79    0.81 
   0   4  -8   10.36    0.76 
   0   4  -8    9.44    0.75 
   0   4  -8   10.34    0.76 
   0   4   8   10.47    0.76 
  -1  -4  -8    9.52    0.63 
   1  -4   8    8.93    0.61 
  -1  -4  -8    7.93    0.69 
  -1  -4  -8    8.87    0.63 
  -1  -4  -8    8.20    0.77 
   1  -4   8    7.75    0.89 
   1  -4   8    8.55    0.68 
   1  -4   8    8.96    0.61 
   1   4   8    8.13    0.61 
   1   4   8    8.49    0.65 
   1   4   8    8.46    0.65 
  -1   4  -8    8.07    0.64 
  -1   4  -8    8.59    0.62 
  -1   4  -8    7.74    0.64 
   1   4   8    7.53    0.64 
  -1   4  -8    8.43    0.79 
   1   4   8    8.18    0.63 
  -2  -4  -8    7.94    0.62 
  -2  -4  -8    9.70    0.62 
   2  -4   8    8.16    0.60 
  -2  -4  -8    8.65    0.61 
   2  -4   8    9.40    0.73 
  -2  -4  -8    8.91    0.61 
  -2  -4  -8    7.72    0.66 
   2  -4   8    8.50    0.60 
   2  -4   8    9.32    0.60 
  -2   4  -8    8.03    0.74 
   2   4   8    7.22    0.59 
   2   4   8    8.75    0.63 
  -2   4  -8    8.39    0.65 
  -2   4  -8    8.63    0.58 
  -2   4  -8    8.05    0.64 
  -3  -4  -8    0.71    0.14 
  -3  -4  -8    1.02    0.14 
   3  -4   8    0.80    0.12 
   3  -4   8    0.89    0.12 
   3  -4   8    0.85    0.12 
   3   4   8    0.75    0.11 
  -3   4  -8    0.75    0.17 
  -3   4  -8    0.89    0.23 
   3   4   8    0.91    0.19 
   4  -4   8   14.71    0.94 
  -4   4  -8   11.07    0.84 
  -4   4  -8   12.98    0.82 
  -5  -5   8    6.88    0.50 
   5  -5  -8    8.33    0.51 
  -5   5   8    6.39    0.52 
  -5   5   8    6.65    0.49 
   5   5  -8    8.58    0.53 
  -5   5   8    6.85    0.53 
  -4  -5   8   11.41    0.76 
  -4  -5   8   11.98    0.79 
   4  -5  -8   11.23    0.75 
  -4  -5   8    9.32    0.73 
   4  -5  -8   11.72    0.75 
   4  -5  -8   11.34    0.76 
  -4   5   8    9.63    0.76 
   4   5  -8   10.62    0.71 
  -4   5   8    8.46    0.79 
  -4   5   8    8.36    0.69 
   4   5  -8    8.59    0.66 
  -4   5   8   11.39    0.74 
   3  -5  -8   15.88    1.11 
   3  -5  -8   17.05    1.11 
  -3  -5   8   16.88    1.12 
  -3  -5   8   18.43    1.17 
   3  -5  -8   16.11    1.12 
  -3   5   8   12.08    0.96 
  -3   5   8   14.24    1.00 
  -3   5   8   12.56    1.04 
  -3   5   8   15.86    1.13 
   3   5  -8   14.42    0.99 
  -3   5   8   14.21    1.03 
  -2  -5   8   12.83    1.08 
   2  -5  -8   13.32    0.96 
   2  -5  -8   13.68    0.94 
   2  -5  -8   15.11    0.96 
  -2  -5   8   14.54    0.97 
   2  -5  -8   14.93    1.03 
  -2  -5   8   14.37    0.97 
  -2  -5   8   15.27    0.96 
   2  -5  -8   13.92    0.95 
  -2  -5   8   13.07    1.00 
  -2  -5   8   12.97    1.04 
  -2   5   8   14.51    0.95 
   2   5  -8   11.78    0.93 
  -2   5   8   13.24    0.94 
  -2   5   8   11.65    0.94 
  -2   5   8   12.62    0.90 
   2   5  -8   11.16    0.85 
  -2   5   8   12.45    1.06 
  -2   5   8   12.78    0.97 
   2   5  -8   14.24    1.02 
   2   5  -8   11.47    0.92 
   1  -5  -8    9.51    0.83 
  -1  -5   8   11.78    0.80 
   1  -5  -8   12.88    0.87 
   1  -5  -8   11.59    0.79 
   1  -5  -8   12.59    0.89 
  -1  -5   8    9.36    0.80 
  -1  -5   8   10.44    0.91 
   1  -5  -8   12.31    0.78 
  -1  -5   8   11.91    0.78 
  -1   5   8   10.58    0.79 
  -1   5   8    9.95    0.82 
   1   5  -8    8.60    0.80 
  -1   5   8   11.22    0.92 
  -1   5   8   10.61    0.80 
   1   5  -8    9.44    0.76 
   1   5  -8   10.77    0.79 
  -1   5   8    9.91    0.75 
  -1   5   8    9.64    0.81 
   1   5  -8   11.46    0.81 
   0  -5  -8    6.74    0.60 
   0  -5   8    7.04    0.52 
   0  -5   8    7.00    0.62 
   0  -5   8    6.00    0.69 
   0  -5  -8    7.12    0.53 
   0  -5  -8    5.60    0.48 
   0  -5   8    5.80    0.47 
   0   5   8    5.96    0.49 
   0   5   8    5.02    0.49 
   0   5   8    5.17    0.49 
   0   5  -8    5.62    0.68 
   0   5  -8    5.74    0.48 
  -1  -5  -8    8.54    0.66 
   1  -5   8    9.87    0.65 
  -1  -5  -8    9.43    0.66 
   1  -5   8    8.67    0.77 
   1  -5   8    9.05    0.75 
   1  -5   8    9.62    0.64 
  -1  -5  -8   10.45    0.66 
   1  -5   8    8.96    0.64 
   1   5   8    8.36    0.63 
   1   5   8    7.63    0.61 
   1   5   8    8.85    0.62 
   1   5   8    7.76    0.63 
  -1   5  -8    8.89    0.64 
  -1   5  -8    8.23    0.77 
  -1   5  -8    8.09    0.62 
  -1   5  -8    8.86    0.65 
  -1   5  -8    7.75    0.55 
  -1   5  -8    7.83    0.62 
  -2  -5  -8    6.70    0.47 
  -2  -5  -8    6.10    0.46 
  -2  -5  -8    6.55    0.46 
   2  -5   8    6.78    0.58 
   2  -5   8    6.77    0.46 
   2  -5   8    5.54    0.45 
   2  -5   8    6.41    0.47 
   2  -5   8    6.59    0.55 
  -2  -5  -8    5.84    0.52 
   2   5   8    6.15    0.47 
  -2   5  -8    5.98    0.59 
  -2   5  -8    5.94    0.49 
   2   5   8    5.66    0.47 
  -2   5  -8    6.39    0.49 
   3  -5   8    0.69    0.09 
  -3  -5  -8    0.56    0.10 
   3  -5   8    0.57    0.08 
   3  -5   8    0.38    0.15 
  -3   5  -8    0.68    0.14 
   3   5   8    0.72    0.15 
  -3   5  -8    0.57    0.14 
   3   5   8    0.58    0.09 
   4  -6  -8    5.82    0.41 
  -4  -6   8    5.85    0.41 
  -4   6   8    4.17    0.33 
  -4   6   8    4.33    0.38 
  -3  -6   8    6.25    0.45 
   3  -6  -8    5.85    0.44 
  -3  -6   8    7.30    0.48 
  -3  -6   8    5.49    0.44 
   3  -6  -8    6.17    0.43 
   3   6  -8    6.50    0.53 
  -3   6   8    5.82    0.56 
   2  -6  -8    1.14    0.25 
   2  -6  -8    1.15    0.21 
  -2  -6   8    1.20    0.19 
   2  -6  -8    1.60    0.23 
  -2  -6   8    1.18    0.17 
   2  -6  -8    1.22    0.15 
   2  -6  -8    1.10    0.19 
  -2   6   8    0.92    0.19 
  -2   6   8    0.59    0.21 
   2   6  -8    0.91    0.19 
  -2   6   8    0.89    0.20 
  -2   6   8    1.24    0.24 
  -2   6   8    0.96    0.22 
   2   6  -8    0.78    0.16 
   2   6  -8    0.83    0.16 
   1  -6  -8    0.20    0.09 
  -1  -6   8    0.27    0.10 
   1  -6  -8    0.54    0.11 
  -1  -6   8    0.32    0.23 
   1  -6  -8    0.38    0.18 
  -1  -6   8    0.46    0.11 
   1  -6  -8    0.52    0.10 
  -1  -6   8    0.56    0.11 
  -1   6   8    0.29    0.13 
   1   6  -8    0.27    0.12 
   1   6  -8    0.40    0.16 
   1   6  -8    0.30    0.11 
  -1   6   8    0.37    0.14 
   1   6  -8    0.12    0.17 
  -1   6   8    0.38    0.12 
   1   6  -8    0.34    0.08 
  -1   6   8    0.18    0.19 
  -1   6   8    0.42    0.16 
  -1   6   8    0.42    0.18 
   0  -6  -8   11.45    0.80 
   0  -6  -8   11.20    0.88 
   0  -6   8   12.09    0.82 
   0  -6  -8   12.27    0.80 
   0  -6   8   11.41    0.79 
   0  -6   8   12.86    0.79 
   0  -6   8    9.71    0.87 
   0  -6  -8   12.80    0.80 
   0   6  -8   10.87    0.73 
   0   6  -8    8.52    0.72 
   0   6  -8    9.92    0.71 
   0   6   8   11.18    0.86 
   0   6   8    9.96    0.65 
   0   6   8    9.77    0.74 
   0   6   8    9.92    0.72 
   0   6   8   10.39    0.71 
   0   6   8    8.49    0.73 
   1  -6   8    0.89    0.12 
   1  -6   8    0.75    0.20 
  -1  -6  -8    0.66    0.12 
  -1  -6  -8    0.48    0.16 
   1  -6   8    0.87    0.12 
  -1  -6  -8    0.59    0.12 
  -1  -6  -8    0.56    0.11 
   1  -6   8    0.61    0.10 
   1   6   8    0.74    0.15 
   1   6   8    0.50    0.14 
  -1   6  -8    0.81    0.17 
   1   6   8    0.57    0.15 
  -1   6  -8    0.66    0.15 
  -1   6  -8    0.57    0.20 
  -1   6  -8    0.65    0.15 
   1   6   8    0.61    0.16 
   2  -6   8    1.93    0.19 
   2  -6   8    2.10    0.17 
  -2  -6  -8    2.42    0.20 
   2  -6   8    2.23    0.18 
  -2  -6  -8    2.05    0.18 
  -2   6  -8    1.55    0.18 
  -2   6  -8    1.57    0.27 
   2   6   8    1.42    0.16 
  -3  -6  -8    0.06    0.05 
  -3   6  -8    0.14    0.06 
  -3  -7   8    0.31    0.06 
   3   7  -8    0.39    0.09 
   3   7  -8    0.38    0.08 
  -3   7   8    0.35    0.10 
  -3   7   8    0.49    0.15 
  -3   7   8    0.62    0.12 
  -3   7   8    0.37    0.12 
  -3   7   8    0.57    0.11 
   2  -7  -8    2.88    0.23 
  -2  -7   8    3.01    0.24 
  -2  -7   8    3.08    0.25 
  -2   7   8    2.73    0.26 
   2   7  -8    3.02    0.27 
  -2   7   8    2.93    0.30 
  -2   7   8    2.70    0.32 
   1  -7  -8    0.36    0.08 
   1  -7  -8    0.86    0.19 
   1  -7  -8    0.59    0.12 
  -1  -7   8    0.63    0.11 
  -1  -7   8    0.31    0.08 
   1  -7  -8    0.50    0.10 
  -1  -7   8    0.70    0.13 
  -1   7   8    0.26    0.12 
  -1   7   8    0.30    0.12 
   1   7  -8    0.46    0.10 
  -1   7   8    0.25    0.16 
   1   7  -8    0.37    0.11 
   1   7  -8    0.33    0.10 
  -1   7   8    0.22    0.12 
   0  -7   8    0.63    0.10 
   0  -7  -8    0.54    0.12 
   0  -7   8    0.80    0.10 
   0  -7   8    0.54    0.09 
   0  -7  -8    0.81    0.11 
   0  -7  -8    0.51    0.11 
   0  -7  -8    0.84    0.19 
   0   7  -8    0.61    0.12 
   0   7  -8    0.33    0.10 
   0   7  -8    0.82    0.15 
   0   7   8    0.42    0.11 
   0   7   8    0.61    0.18 
   0   7   8    0.77    0.15 
   0   7  -8    0.50    0.19 
   0   7   8    0.50    0.14 
   0   7   8    0.60    0.14 
  -1  -7  -8    6.28    0.43 
   1  -7   8    6.64    0.43 
  -1  -7  -8    5.53    0.42 
   1   7   8    5.31    0.41 
  -1   7  -8    5.95    0.41 
  -1   7  -8    4.97    0.48 
  -6   0   9    1.39    0.16 
   6   0  -9    1.17    0.12 
  -6   0   9    1.02    0.20 
   5   0  -9    1.11    0.14 
   5   0  -9    0.91    0.21 
  -5   0   9    0.93    0.21 
  -5   0   9    1.24    0.31 
   5   0  -9    0.94    0.13 
   4   0  -9    3.05    0.27 
   4   0  -9    3.33    0.37 
   4   0  -9    3.45    0.44 
  -4   0   9    3.04    0.46 
   4   0  -9    2.86    0.37 
   4   0  -9    3.14    0.29 
  -4   0   9    2.79    0.36 
   4   0  -9    2.85    0.39 
  -4   0   9    3.02    0.44 
  -4   0   9    2.90    0.37 
   3   0  -9   21.00    1.43
[truncated: 76,626 more chars]
